# Supplementary material for: Supramolecular catalysis in confined space: making the pyrogallol[4]arene capsule catalytically active in non-competitive solvent
Source: Royal Society of Chemistry journal article supplement (doi:10.1039/d2qo00172a), 2022-01-01

## Supporting Information

# Supramolecular Catalysis in Confined Space: Making the Pyrogallol[4]arene Capsule Catalytically Active in Non-Competitive Solvent

Pellegrino La Manna,<sup>[a]</sup> Carmen Talotta,<sup>\*[a]</sup> Carmine Gaeta,<sup>[a]</sup> Yoram Cohen,<sup>\*[b]</sup> Sarit Slovak,<sup>[b]</sup> Antonio Rescifina,<sup>\*[c]</sup> Paolo Della Sala,<sup>[a]</sup> Margherita De Rosa,<sup>[a]</sup> Annunziata Soriente,<sup>[a]</sup> Placido Neri<sup>\*[a]</sup>

---

[a] Dr P. La Manna, Prof. C. Talotta, Prof. C. Gaeta, Dr P. Della Sala, Prof. M. De Rosa, Prof. A. Soriente and Prof. P. Neri  
Laboratory of Supramolecular Chemistry,  
Dipartimento di Chimica e Biologia "A. Zambelli",  
Università di Salerno,  
Via Giovanni Paolo II 132, I-84084 Fisciano (Salerno), Italy.  
E-mail: ctalotta@unisa.it, [neri@unisa.it](mailto:neri@unisa.it)

[b] Prof. Y. Cohen, Dr S. Slovak  
School of Chemistry, The Sackler Faculty of Exact Sciences,  
Tel Aviv University,  
Ramat Aviv, 69978 Tel Aviv, Israel.  
E-mail: [ycohen@tauex.tau.ac.il](mailto:ycohen@tauex.tau.ac.il)

[c] Prof. A. Rescifina  
Dipartimento di Scienze del Farmaco e della Salute  
Università di Catania,  
Viale Andrea Doria 6, I-95125 Catania, Italy.  
E-mail: [arescifina@unict.it](mailto:arescifina@unict.it)

|                                                                                                                                                                              |     |
|------------------------------------------------------------------------------------------------------------------------------------------------------------------------------|-----|
| 1. General Remarks                                                                                                                                                           | S1  |
| 2. General Procedures                                                                                                                                                        | S2  |
| 2.0 Monitoring of cycloaddition reaction                                                                                                                                     | S2  |
| 2.1. General procedure for 1,3-dipolar cycloaddition reaction without capsule in the presence of L-proline, crotonaldehyde <b>4</b> , and nitrene <b>3</b>                   | S2  |
| 2.2 General procedure for 1,3-dipolar cycloaddition reaction with capsule <b>CP<sub>6</sub></b> in the presence of L-proline, crotonaldehyde <b>4</b> , and nitrene <b>3</b> | S2  |
| 2.3 General procedure for 1,3-dipolar cycloaddition reaction with capsule <b>CP<sub>6</sub></b> in the presence of L-proline, crotonaldehyde <b>4</b> , and nitrene <b>3</b> | S4  |
| 2.4 Procedure for the inhibition experiments                                                                                                                                 | S4  |
| 2.5 General procedure for reduction of mixture of isoxazolidine adducts                                                                                                      | S6  |
| 3. Inhibition Experiments                                                                                                                                                    | S6  |
| 3.1. Inhibition experiments with DMSO                                                                                                                                        | S6  |
| 3.2. Inhibition experiments with tetralkylammonium salts                                                                                                                     | S8  |
| 4. Encapsulation Experiments                                                                                                                                                 | S9  |
| 4.1 Encapsulation experiments of crotonaldehyde <b>4</b> inside capsule <b>CP<sub>6</sub></b>                                                                                | S9  |
| 4.2 2D experiments for the encapsulation of crotonaldehyde <b>4</b> inside capsule <b>CP<sub>6</sub></b>                                                                     | S13 |
| 4.2.1 2D ROESY of the mixture of <b>CP<sub>6</sub></b> and crotonaldehyde <b>4</b>                                                                                           | S13 |
| 4.2.2 2D COSY of the mixture of <b>CP<sub>6</sub></b> and crotonaldehyde <b>4</b>                                                                                            | S15 |
| 4.2.3 2D HSQC of the mixture of <b>CP<sub>6</sub></b> and crotonaldehyde <b>4</b>                                                                                            | S16 |
| 4.2.4 <sup>13</sup> C NMR of the mixture of <b>CP<sub>6</sub></b> and crotonaldehyde <b>4</b>                                                                                | S17 |
| 4.2.4 <sup>13</sup> C NMR of the mixture of <b>CP<sub>6</sub></b> and crotonaldehyde <b>4</b>                                                                                | S18 |
| 4.3 Diffusion NMR Experiments for the encapsulation of crotonaldehyde <b>4</b> inside capsule <b>CP<sub>6</sub></b>                                                          | S19 |
| 4.4 Encapsulation experiments of nitrene <b>3</b> inside capsule <b>CP<sub>6</sub></b>                                                                                       | S22 |
| 4.4.1 <sup>1</sup> H NMR spectra of mixture of <b>CP<sub>6</sub></b> and nitrene <b>3</b>                                                                                    | S22 |
| 4.4.2 2D EXSY NMR of mixture of <b>CP<sub>6</sub></b> and nitrene <b>3</b>                                                                                                   | S24 |
| 4.4.3 <sup>13</sup> C NMR spectrum of nitrene <b>3</b>                                                                                                                       | S25 |
| 4.4.4 <sup>13</sup> C NMR spectrum of mixture of <b>CP<sub>6</sub></b> and nitrene <b>3</b>                                                                                  | S26 |
| 4.4.5 2D HSQC NMR of mixture of <b>CP<sub>6</sub></b> and nitrene <b>3</b>                                                                                                   | S27 |
| 4.4.6 2D DOSY NMR of mixture of <b>CP<sub>6</sub></b> and nitrene <b>3</b>                                                                                                   | S28 |
| 4.5 Encapsulation L-proline inside capsule <b>CP<sub>6</sub></b>                                                                                                             | S29 |
| 4.5.1 <sup>1</sup> H NMR spectrum of mixture of <b>CP<sub>6</sub></b> and L-proline                                                                                          | S29 |
| 4.5.2 2D HSQC NMR of mixture of <b>CP<sub>6</sub></b> and L-proline                                                                                                          | S30 |
| 4.5.3 2D DOSY NMR of mixture of <b>CP<sub>6</sub></b> and L-proline                                                                                                          | S31 |
| 4.6 Encapsulation of iminium species inside capsule <b>CP<sub>6</sub></b>                                                                                                    | S32 |
| 4.6.1 <sup>1</sup> H NMR spectra of mixture of <b>CP<sub>6</sub></b> , L-proline, and crotonaldehyde                                                                         | S32 |
| 4.6.2 2D DOSY NMR of mixture of <b>CP<sub>6</sub></b> , L-proline, and crotonaldehyde                                                                                        | S33 |
| 5. <sup>1</sup> H NMR spectra of the products arising from the 1,3-dipolar cycloaddition reactions and of reduced cycloadducts                                               | S34 |
| 6. HPLC chromatograms                                                                                                                                                        | S48 |
| 7. Computational Studies                                                                                                                                                     | S51 |
| 7.1. Quantum mechanical, ONIOM, and molecular dynamics calculations                                                                                                          | S51 |
| 7.2. Cartesian coordinates for selected fully optimized compounds and transition states                                                                                      | S53 |

---

## 1. General Remarks

All chemicals were reagent grade and were used without further purification. Solvents were purchased from Aldrich. Reaction temperatures were measured externally; reactions were monitored by  $^1\text{H}$  NMR and by TLC on Merck silica gel plates (0.25 mm) and visualized by UV light. Flash chromatography was performed on Merck silica gel (60, 40-63  $\mu\text{m}$ ). NMR spectra were recorded on Bruker Avance-600 spectrometer [600.13 ( $^1\text{H}$ ) and 150.03 MHz ( $^{13}\text{C}$ )], Bruker Avance-400 spectrometer [400 ( $^1\text{H}$ ) and 100.57 MHz ( $^{13}\text{C}$ )], Bruker Avance-300 spectrometer [300 ( $^1\text{H}$ ) and 75.48 MHz ( $^{13}\text{C}$ )], or Bruker Avance-250 spectrometer [250 ( $^1\text{H}$ ) and 62.80 MHz ( $^{13}\text{C}$ )]; chemical shifts are reported relative to the residual solvent peak ( $\text{CHCl}_3$ :  $\delta$  7.26,  $\text{CDCl}_3$ :  $\delta$  77.23). For nitrone **3**, L-proline and iminium species, DOSY experiments were performed on a Bruker Avance-600 spectrometer equipped with 5 mm PABBO BB|19F-1H\|D Z-GRD Z114607/0109. The standard Bruker pulse program, ledbpgp2s, employing a double stimulated echo sequence and LED, bipolar gradient pulses for diffusion, and two spoil gradients were utilized. Diffusion times were 150 ms, eddy current delay was 5 ms, gradient recovery delays was 0.2 ms, and gradient pulse was 1400 ms. Individual rows of the quasi2D diffusion databases were phased and baseline corrected. For crotonaldehyde **4**, a different approach was exploited (see section 4.3). EXSY 2D experiments were performed on Bruker Avance 400 and Bruker Avance 600 spectrometers with a D8 value range from 0.05 to 0.75 s. HPLC analysis was performed using a Jasco HPLC system equipped with PU-4180 HPLC pump, 20  $\mu\text{l}$  loop injector (Rheodyne model 7725i) and MD-4015 Photodiode Array Detector at  $\lambda = 210$  or 220 nm. As stationary phase, the following Chiralcel column was used: OD-H (250 x 4.6 mm) and OD guard (50 mm). C-undecylresorcin[4]rene **1**, pyrogallol[4]arene **2**, and nitrone **3** were synthesized according to literature procedures.<sup>1,2,3</sup> Percentages of conversions, regioisomeric and diastereomeric ratios of isoxazolidines **5** and **6** were determined by  $^1\text{H}$  NMR analysis in comparison with literature data.<sup>4</sup>

---

<sup>1</sup> Q. Zhang, K. Tiefenbacher, *Nature Chem.* **2015**, *7*, 197-202.

<sup>2</sup> Q. Zhang, L. Catti, V. R. I. Kaila, K. Tiefenbacher, *Chem. Sci.* **2017**, *8*, 1653-1657.

<sup>3</sup> S. Pagoti, D. Dutta, J. Dash, *Adv. Synth. Catal.* **2013**, *355*, 3532-3538.

<sup>4</sup> a) T. Otsuki, J. Kumagai, Y. Kohari, Y. Okuyama, E. Kwon, C. Seki, K. Uwai, Y. Mawatari, N. Kobayashi, T. Iwasa, M. Tokiwa, M. Takeshita, A. Maeda, A. Hashimoto, K. Turuga, H. Nakano, *Eur. J. Org. Chem.* **2015**, 7292-7300; b) X. Wang, C. Weigl, M. P. Doyle, *J. Am. Chem. Soc.* **2011**, *133*, 9572-9579; c) W. S. Jen, J. J. M. Wiener, D. W. C. MacMillan, *J. Am. Chem. Soc.* **2000**, *122*, 9874-9875; d) M. Lemay, J. Trant, W. W. Ogilvie, *Tetrahedron* **2007**, *63*, 11644-11655.

---

## 2. General Procedures

### 2.0 Monitoring of cycloaddition reaction

The progress of the cycloaddition reaction was controlled after 4 h and 16 h by following  $^1\text{H}$  NMR signals associated with nitrones. The reaction was stopped after the consumption of nitron or when its conversion reached a plateau. The enantiomeric excess value was determined by HPLC analysis by converting the mixture of isoxazolidines to the corresponding alcohols. 50  $\mu\text{L}$  of the reaction solution was poured in the vial, diluted with 350  $\mu\text{L}$  of  $\text{C}_6\text{D}_6$ , and the reaction progress was monitored by  $^1\text{H}$  NMR. In Figure S1, the  $^1\text{H}$  NMR spectrum of the reaction mixture for the experiment of Table 1, entry 7 (in the manuscript) can be seen.

### 2.1. General procedure for 1,3-dipolar cycloaddition reaction without capsule in the presence of L-proline, crotonaldehyde **4**, and nitron **3**

L-proline (16.3  $\mu\text{mol}$ , 0.2 eq.) was weighed into a 4 mL vial and deuterated benzene (0.55 mL) was added. Next, crotonaldehyde **4** (325.2  $\mu\text{mol}$ , 4.0 eq.) was added, followed by nitron **3** (81.3  $\mu\text{mol}$ , 1.0 eq.). The vial was thermostatically controlled at 30  $^\circ\text{C}$  and maintained under vigorous stirring for an appropriate time. The progress of the reaction was monitored by  $^1\text{H}$  NMR analysis by periodically sampling from the reaction mixture at different times.

### 2.2 General procedure for 1,3-dipolar cycloaddition reaction with capsule **CR**<sub>6</sub> in the presence of L-proline, crotonaldehyde **4**, and nitron **3**

C-undecylresorcin[4]arene **1** (140.8 mg, 127.4  $\mu\text{mol}$ , 1.56 eq.) was weighed in a 4 mL vial. Then, 0.55 mL of water-saturated deuterated benzene was added and the mixture was stirred at 30  $^\circ\text{C}$  for 15 minutes until resorcinarene was completely dissolved. L-proline (16.3  $\mu\text{mol}$ , 0.2 eq.) was added to the solution and the mixture was stirred for 30 minutes. Subsequently, crotonaldehyde **4** (325.2  $\mu\text{mol}$ , 4.0 eq.) was added and the reaction mixture was stirred for further 5 minutes. Then nitron **3** (81.3  $\mu\text{mol}$ , 1.0 eq.) was added and the reaction mixture was stirred at 30  $^\circ\text{C}$  and checked at the desired time (generally, 4 hrs). Quenching of the reaction was performed by adding the reaction mixture to a 50 mL conical eppendorf tube and diluting with 40 mL n-hexane. To this mixture, 40  $\mu\text{L}$  of DMSO were added. The eppendorf tube was placed in a freezer at  $-20$   $^\circ\text{C}$  for at least 2 h and successively centrifuged at 3000 rpm for 5 minutes. The diluted reaction mixture was subjected three times to this procedure. Finally, the clear solution was removed and concentrated under reduced pressure. The oily residue thus obtained was purified by flash chromatography on silica gel (hexane/ethyl acetate, from 100 to 80:20) to afford the desired compounds (isoxazolidines **5** and **6**).

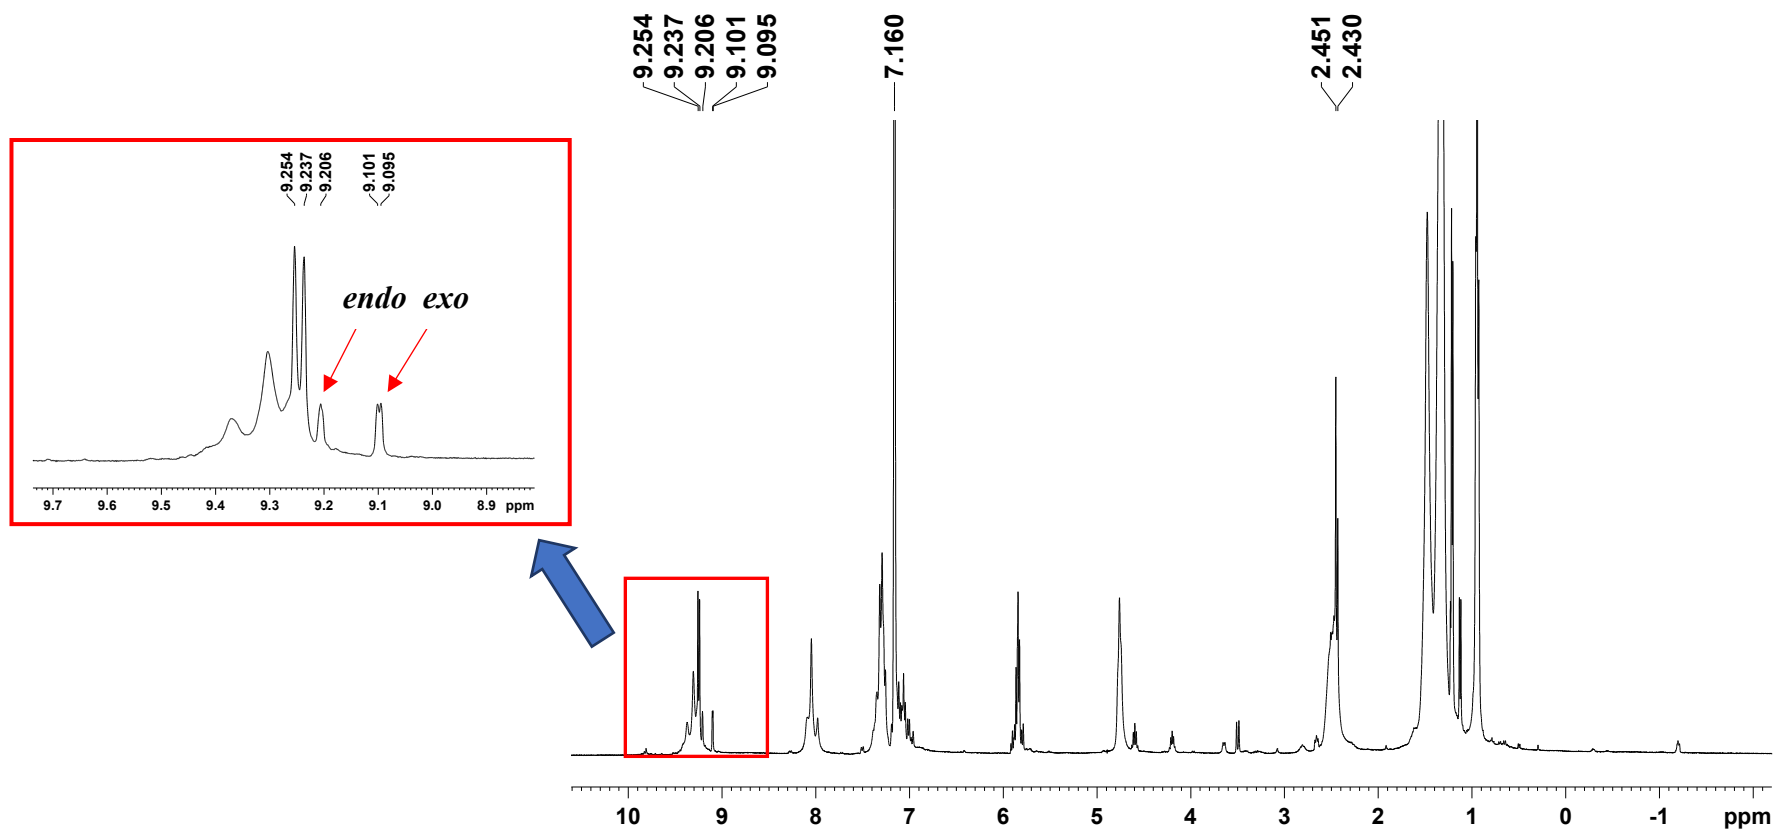

**Figure S1.** <sup>1</sup>H NMR (300 MHz, C<sub>6</sub>D<sub>6</sub>, 298 K) of the crude reaction mixture between **3** and **4** in the presence of CP<sub>6</sub> and L-proline as described in Table 1, entry 7 in the manuscript. Expansion of low field spectral zone, with crotonaldehyde **4** and *endo/exo*-**5** cycloadducts peaks (indicated by arrows), is visible.

---

### 2.3 General procedure for 1,3-dipolar cycloaddition reaction with capsule **CP<sub>6</sub>** in the presence of L-proline, crotonaldehyde **4**, and nitrone **3**

C-undecylpyrogallol[4]arene **2** (127.4  $\mu\text{mol}$ , 148 mg) was weighed in a 4 mL vial. Then, 0.55 mL of deuterated benzene was added and the mixture was stirred at 30 °C for 15 minutes until pyrogallolarene was completely dissolved. L-proline (1.9 mg, 16.3  $\mu\text{mol}$ ) was added to the solution and the mixture was stirred for 30 minutes. Subsequently, crotonaldehyde **4** (325.2  $\mu\text{mol}$ , 26.9  $\mu\text{L}$ ) was added and the reaction mixture was stirred for further 5 minutes. Then, nitrone **3** (81.3  $\mu\text{mol}$ , 11 mg) was added and the reaction mixture was stirred at 30 °C and checked at the desired time (generally, 4 hr). Quenching of the reaction was performed by adding the reaction mixture to a 50 mL conical eppendorf tube and diluting with 40 mL *n*-hexane. To this mixture, 70  $\mu\text{L}$  of DMSO were added. The eppendorf tube was placed in a freezer at -20 °C for at least 2 h and successively centrifuged at 3000 rpm for 5 minutes. The diluted reaction mixture was subjected three times to this procedure. Finally, the clear solution was removed and concentrated under reduced pressure. The oily residue thus obtained was purified by flash chromatography on silica gel (hexane/ethyl acetate, from 100 to 80:20) to afford the desired compounds (isoxazolidines **5** and **6**). Figure S2 shows the mixture of isoxazolidines as isolated by FC means.

### 2.4 Procedure for the inhibition experiments

C-undecylpyrogallol[4]arene **2** (127.4  $\mu\text{mol}$ , 148 mg) was weighed in a 4 mL vial. Then, 0.55 mL of deuterated benzene was added and the mixture was stirred at 30 °C for 15 minutes until pyrogallolarene was completely dissolved. L-proline (1.9 mg, 16.3  $\mu\text{mol}$ ), tetralkylammonium salt (concentration indicated in Table 1 in the main text) was added to the solution and the mixture was stirred for 30 minutes. Subsequently, crotonaldehyde **4** (325.2  $\mu\text{mol}$ , 26.9  $\mu\text{L}$ ) was added and the reaction mixture was stirred for further 5 minutes. Then, nitrone **3** (81.3  $\mu\text{mol}$ , 11 mg) was added and the reaction mixture was stirred at 30 °C and checked at the desired time (generally, 4 hr).

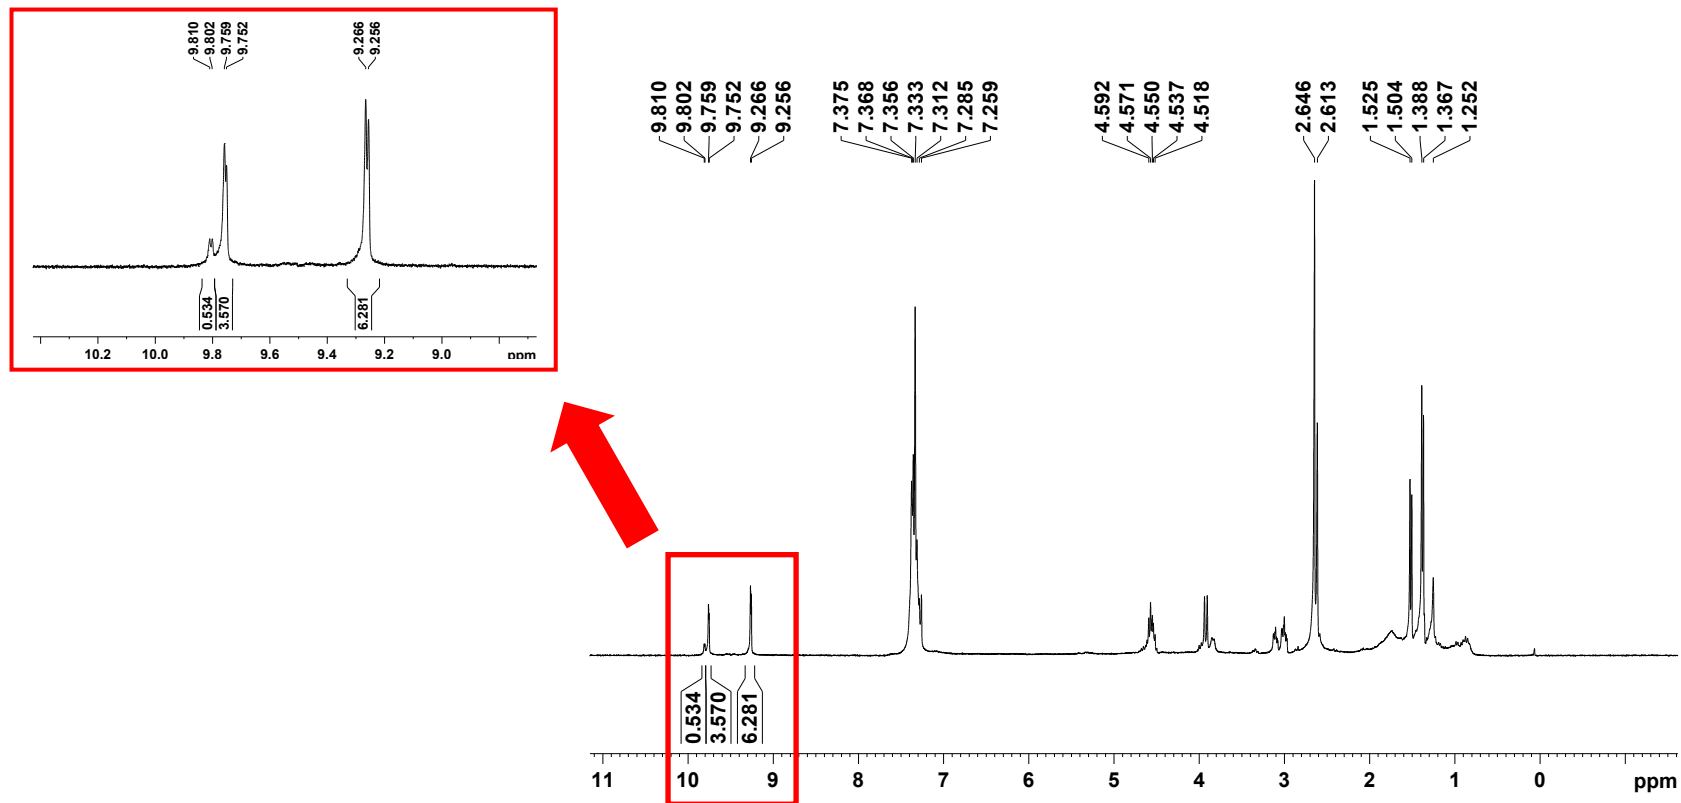

**Figure S2.**  $^1\text{H}$  NMR (300 MHz,  $\text{CDCl}_3$ , 298 K) of the crude reaction mixture between **3** and **4** in the presence of **CP**<sub>6</sub> and L-proline as described in **Table 1, entry 2** in the manuscript. Expansion of low field spectral zone, with aldehyde cycloadduct peaks (indicated by arrows), is visible.

---

## 2.5 General procedure for reduction of mixture of isoxazolidine adducts

To a solution of compounds **5** and **6** (0.15 mmol) in EtOH (2 mL), NaBH<sub>4</sub> (0.30 mmol, 2 eq.) was added and the resulting mixture was stirred at 30 °C for 75 min. The reaction was quenched by the addition of NH<sub>4</sub>Cl saturated solution (5 mL), then EtOH was partially removed under reduced pressure and the residue was extracted with CH<sub>2</sub>Cl<sub>2</sub> (3 × 10 mL). The combined organic phases were washed with deionized H<sub>2</sub>O and dried over Na<sub>2</sub>SO<sub>4</sub>, filtered and concentrated under reduced pressure to give the corresponding purified mixture of alcohols as a yellowish oil, as confirmed by <sup>1</sup>H NMR analysis.

## 3. Inhibition Experiments

### 3.1. Inhibition experiments with DMSO

It has been widely reported that DMSO is able to break the hexameric assembly of the pyrogallolarene capsule **CP<sub>6</sub>** by interfering with hydrogen bonding of hydroxyl groups. So, to highlight whether a capsule exerts a catalytically relevant role, a reaction in the presence of DMSO (151 μL, 3.86 M, 100 eq. in comparison to the capsule **CP<sub>6</sub>**) and the capsule **CP<sub>6</sub>** (38.6 mM) has been performed.

The <sup>1</sup>H NMR spectrum of the crude reaction mixture in Figure S3 shows very weak NMR signals at low field, indicative of the presence of a little amount of the aldehyde cycloadducts. After purification by FC, only scarce yields are obtained. This outcome can be attributed to the disassembling of the pyrogallolarene capsule in the presence of a hydrogen bonding competitor.



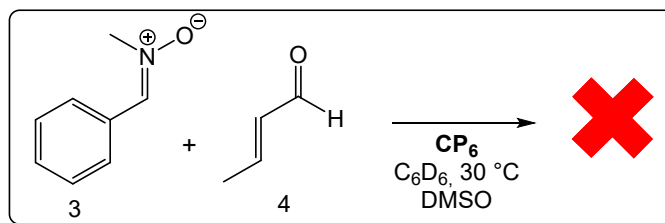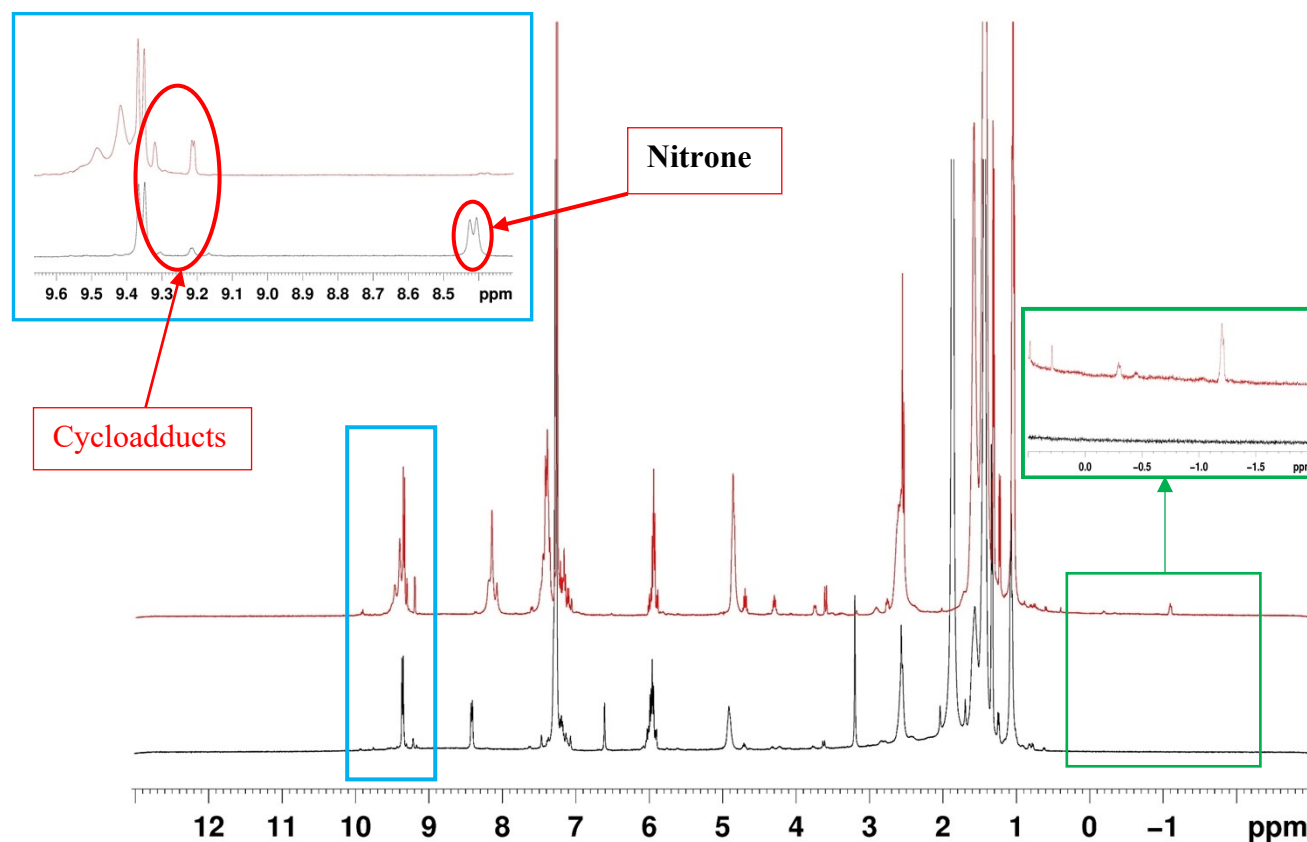

**Figure S3.** Stacked  $^1\text{H}$  NMR spectra (400 MHz,  $\text{C}_6\text{D}_6$ , 298 K) of: (bottom) reaction between **3** (148 mM, 1 equiv.) and **4** (591 mM, 4 equiv.) in the presence of L-proline (29.7 mM, 0.2 equiv.), capsule **CP<sub>6</sub>** (38.6 mM, 0.26 equiv.) and DMSO (100 equiv. in comparison to **CP<sub>6</sub>**) as inhibitor: the crude reaction mixture after 4 h at 30 °C; (top) similar reaction but without DMSO. It is clearly evident how the presence of inhibitor largely reduces the formation of products. It is also noteworthy to observe the absence of protonic signals associated to the encapsulated aldehyde at low field in the presence of DMSO.

### 3.2. Inhibition experiments with tetralkylammonium salts

An evidence that cycloaddition reaction occurred inside supramolecular host **CP**<sub>6</sub> has been furnished by control experiments performed in the presence of tetralkylammonium guests. Indeed, efficient competition of these salts for the inner space of capsule **CR**<sub>6</sub> has been reported by several authors. Moreover, encapsulation of ammonium salts by pyrogallolarene capsule **CP**<sub>6</sub> in benzene has been reported by Cohen et al<sup>5</sup>. Reaction performed in the presence of **NEt**<sub>4</sub>**BF**<sub>4</sub> (3.5 eq. in comparison to the capsule **CP**<sub>6</sub>) gave no trace of products after 4h. This result can be ascribed to an efficient blocking of the cavity by this ammonium salt.

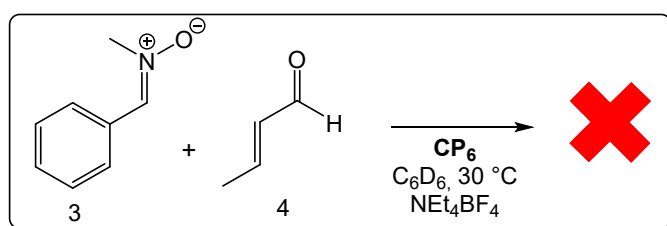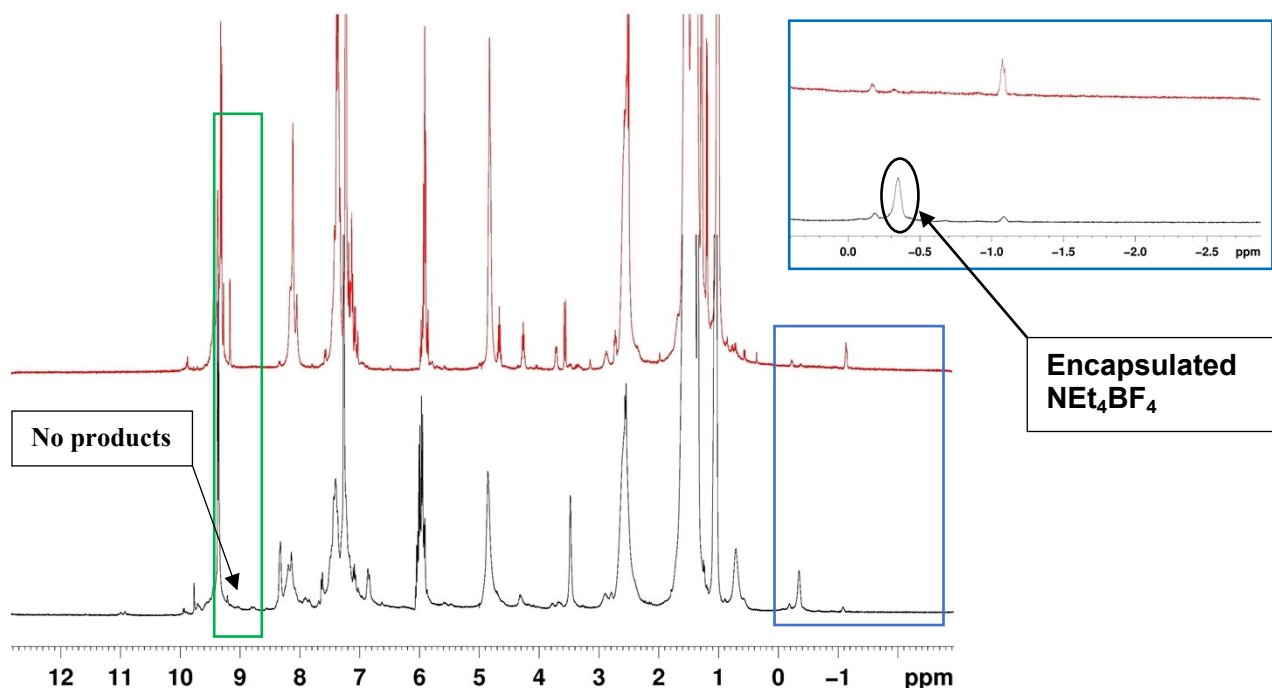

**Figure S4.** Stacked <sup>1</sup>H NMR spectra (400 MHz, C<sub>6</sub>D<sub>6</sub>, 298 K) of: (bottom) reaction between **3** (148 mM, 1 equiv.) and **4** (591 mM, 4 equiv.) in the presence of L-proline (29.7 mM, 0.2 equiv.), capsule **CP**<sub>6</sub> (38.6 mM, 0.26 equiv.), and **NEt**<sub>4</sub>**BF**<sub>4</sub> (3.5 equiv. in comparison to **CP**<sub>6</sub>) as inhibitor: the crude reaction mixture after 4 h at 30 °C; (top) similar reaction but without the ammonium salt. It is clearly evident how the presence of ammonium salt inhibits the reaction. Encapsulation of tetraethylammonium salt is also evident in the inset.

<sup>5</sup> Cohen, Y.; Yariv-Shoushan, S.; Encapsulated or Not Encapsulated? Ammonium Salts Can Be Encapsulated in Hexameric Capsules of Pyrogallol[4]arene. *Org. Lett.* **2016**, *18*, 936–939. DOI: 10.1021/acs.orglett.5b03655.

## 4. Encapsulation Experiments

### 4.1 Encapsulation experiments of crotonaldehyde **4** inside capsule **CP<sub>6</sub>**

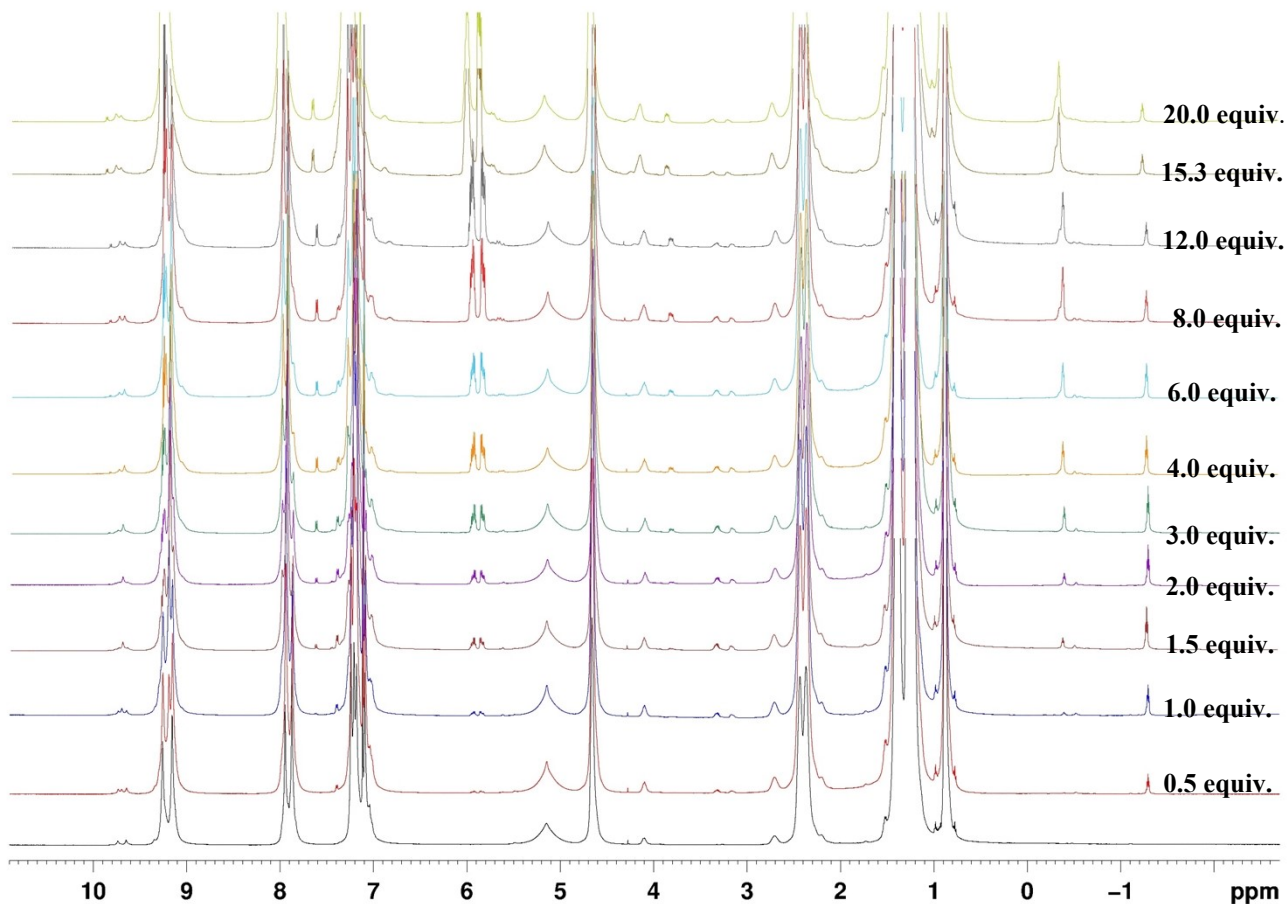

**Figure S5.** Stacked <sup>1</sup>H NMR spectra (600 MHz, CDCl<sub>3</sub>, 298K) of crotonaldehyde **4** (from 0 to 20 equiv. in comparison to capsule **CP<sub>6</sub>**, from bottom to top) and **CP<sub>6</sub>** (21.2 μmol).

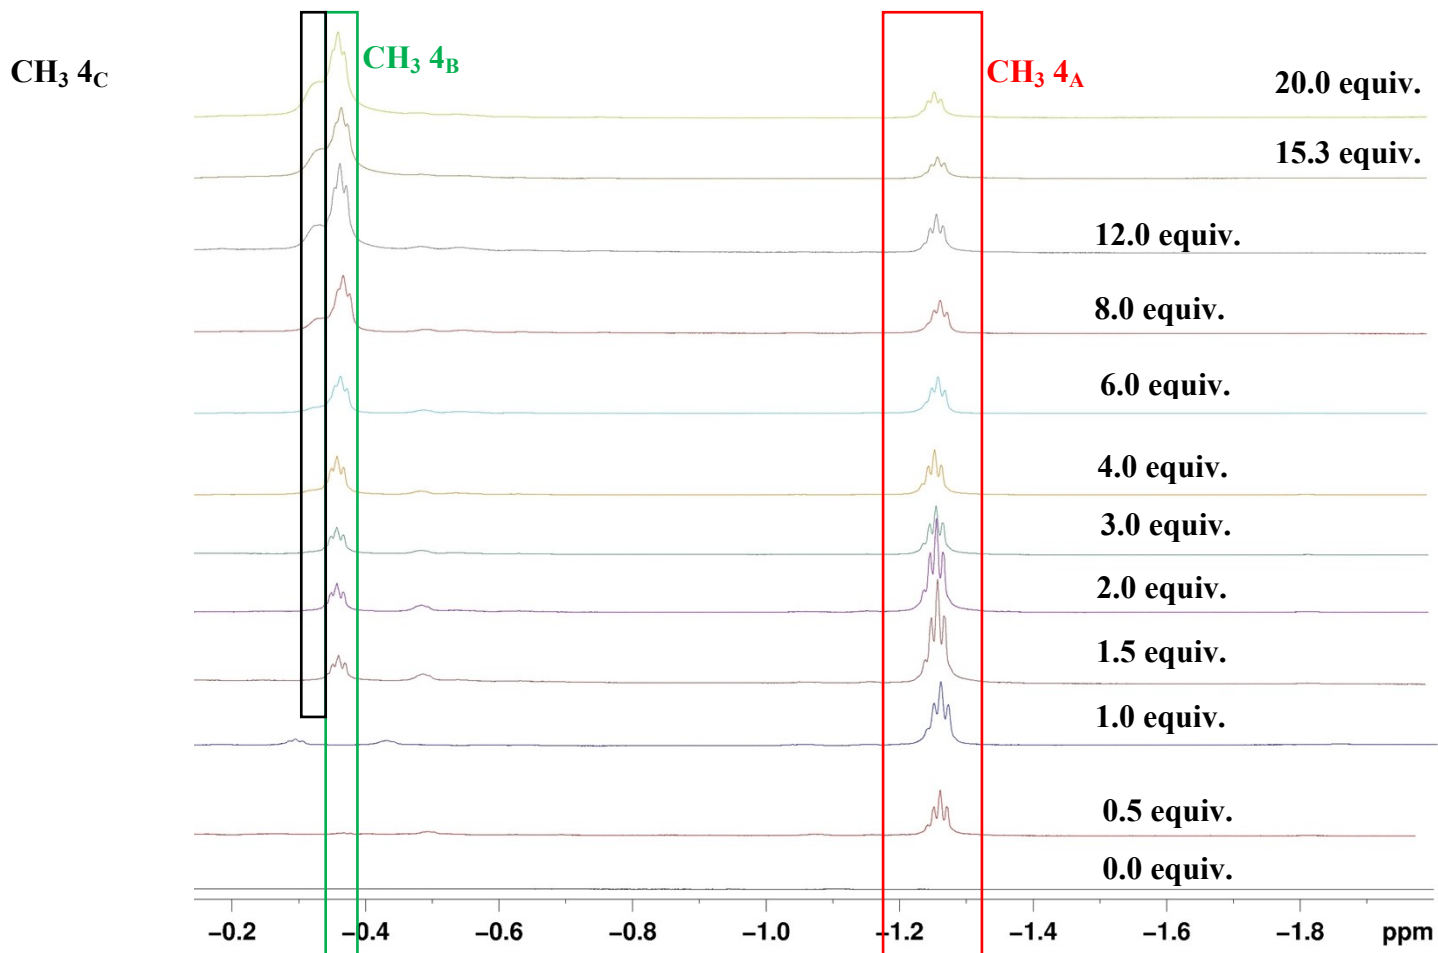

**Figure S6.** Significant portion of **Figure S5** between -0.2 and 2.0 ppm. Increasing concentration of guest **4** leads to an initial increase, followed by a later decrease, of the intensity of CH<sub>3</sub> **4**<sub>A</sub> signal; instead, intensity of CH<sub>3</sub> **4**<sub>B</sub> and CH<sub>3</sub> **4**<sub>C</sub> shows a constant increasing pattern until the plateau (reached with 15.3 equiv. of crotonaldehyde **4**).

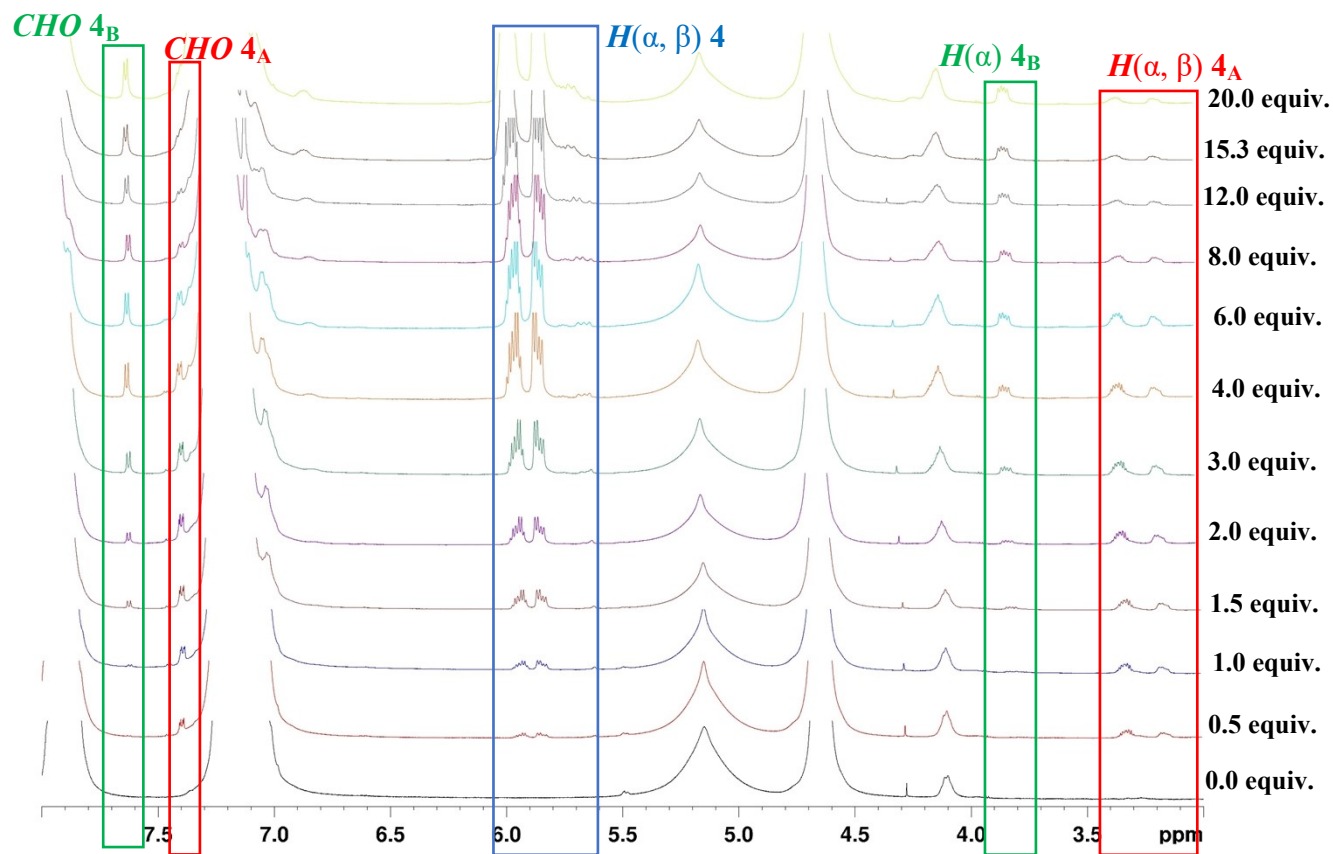

**Figure S7.** Significant portion of **Figure S5** between 8.0 and 3.0 ppm. The trend before observed for **CH<sub>3</sub> 4<sub>A</sub>** and **CH<sub>3</sub> 4<sub>B</sub>** is confirmed also for the **H(α,β) 4<sub>A</sub>** and **4<sub>B</sub>** signals.

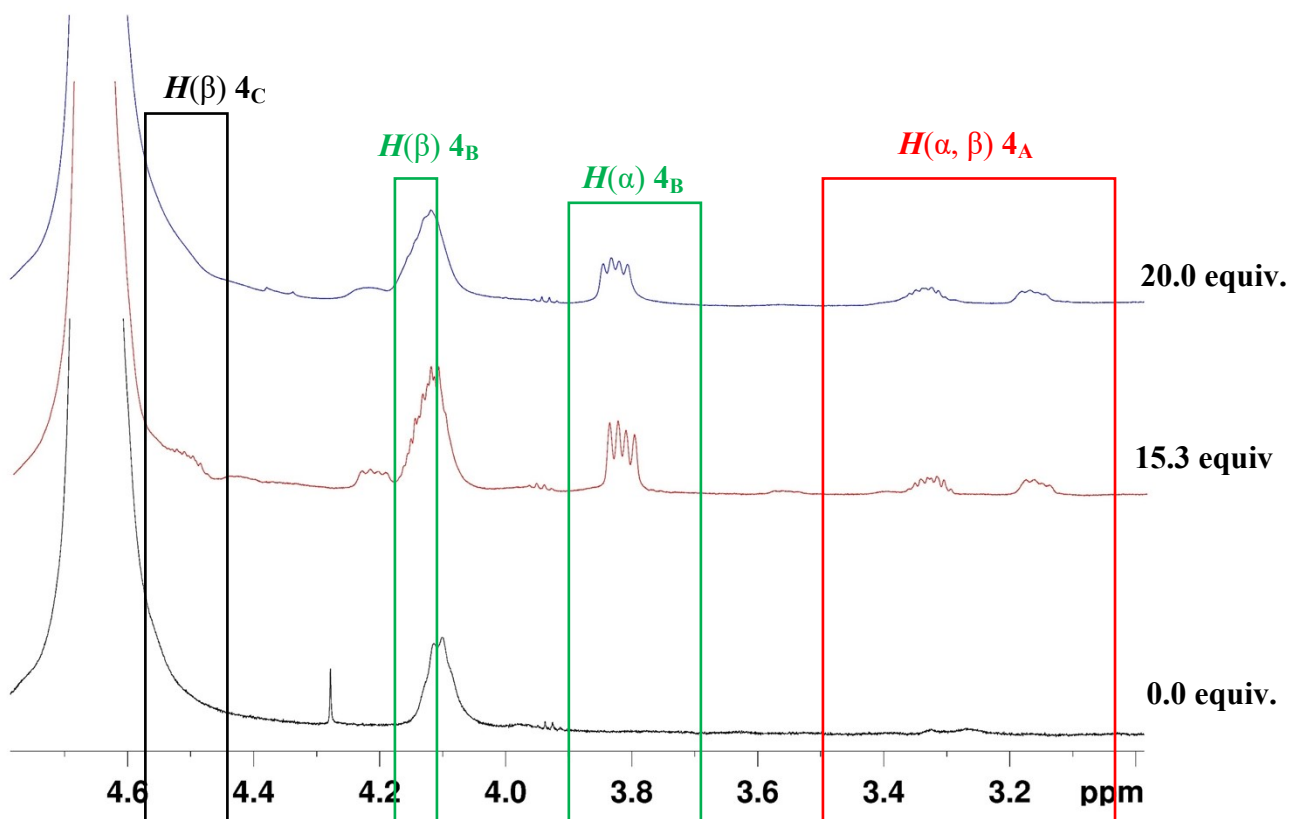

**Figure S8.** Significant portion of **Figure S5** between 4.8 and 3.3 ppm. A better scenario showing the signal  $H(\beta) 4_c$  can be seen.

## 4.2 2D experiments for the encapsulation of crotonaldehyde **4** inside capsule **CP<sub>6</sub>**

### 4.2.1 2D ROESY of the mixture of **CP<sub>6</sub>** and crotonaldehyde **4**

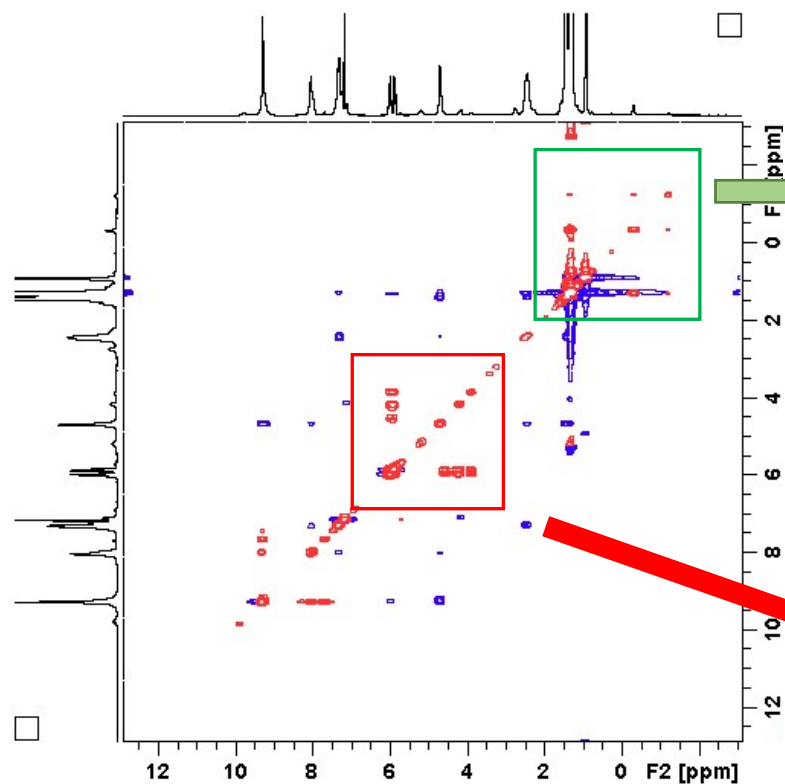

**Figure S9.** 2D ROESY spectrum (400 MHz, C<sub>6</sub>D<sub>6</sub>, 298 K, p15 = 0.50 s) of the mixture of **CP<sub>6</sub>** (38.6 mM) and crotonaldehyde **4** (15.3 equiv).

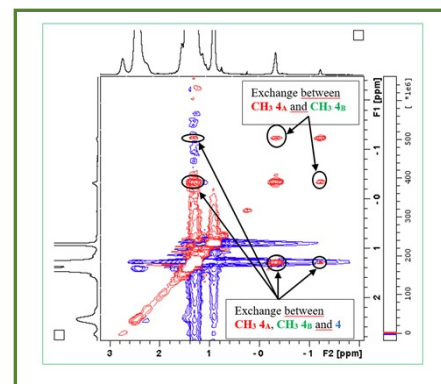

**Figure S10.** Relevant portion of 2D ROESY spectrum (400 MHz, C<sub>6</sub>D<sub>6</sub>, 298 K, p15 = 0.50 s) in **Figure S9**.

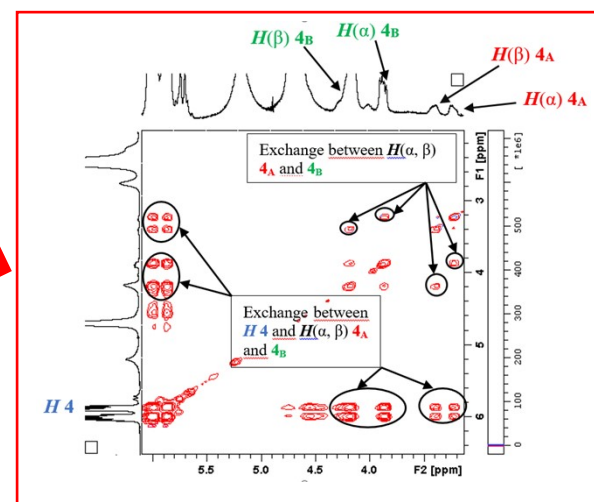

**Figure S11.** Relevant portion of 2D ROESY (400 MHz, C<sub>6</sub>D<sub>6</sub>, 298 K, p15 = 0.50 s) in **Figure S9**.

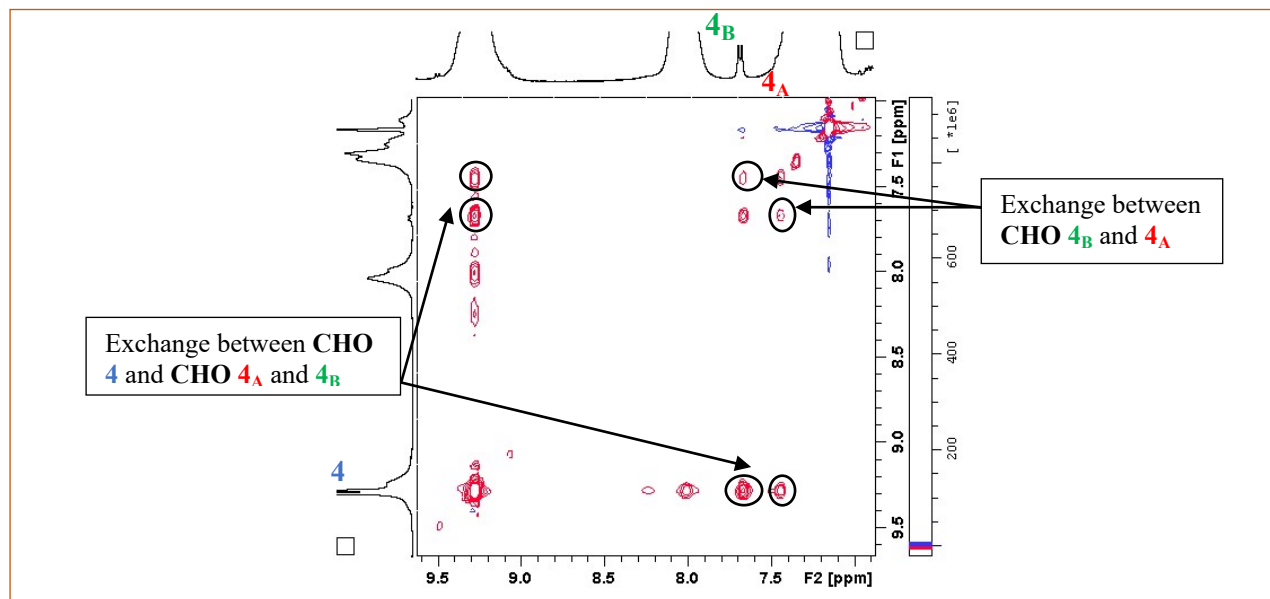

**Figure S12.** Relevant portion of 2D ROESY spectrum (400 MHz, C<sub>6</sub>D<sub>6</sub>, 298 K, p15 = 0.50 s) in **Figure S9**.



#### 4.2.2 2D COSY of the mixture of CP<sub>6</sub> and crotonaldehyde 4

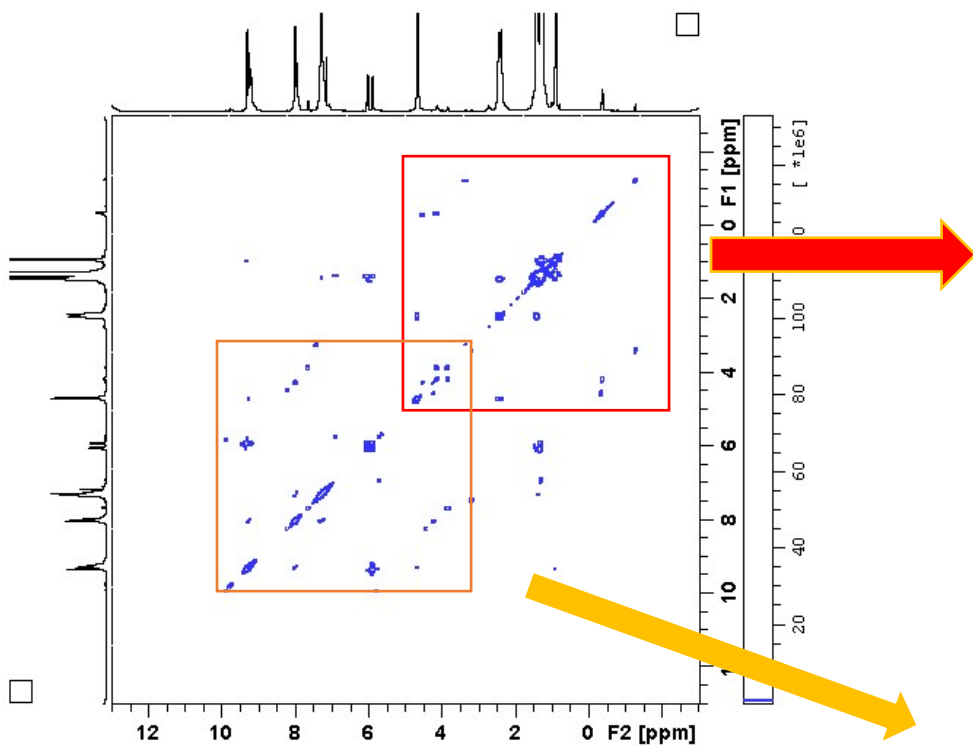

**Figure S13.** 2D COSY (600 MHz, C<sub>6</sub>D<sub>6</sub>, 298 K) of the mixture of CP<sub>6</sub> (38.6 mM) and crotonaldehyde 4 (15.3 equiv).

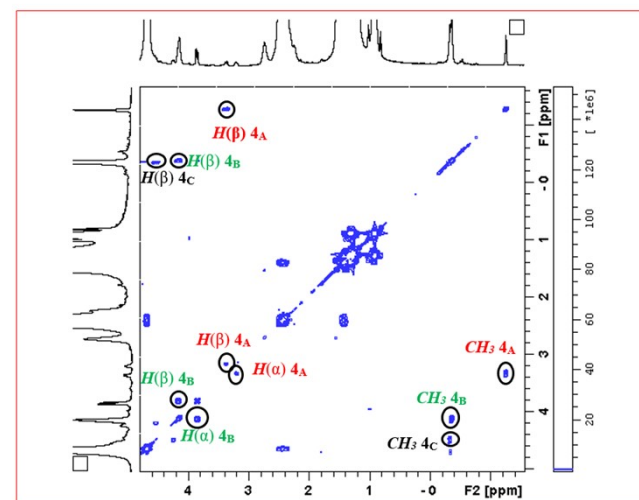

**Figure S14.** Relevant portion of 2D COSY (400 MHz, C<sub>6</sub>D<sub>6</sub>, 298 K) in Figure S13.

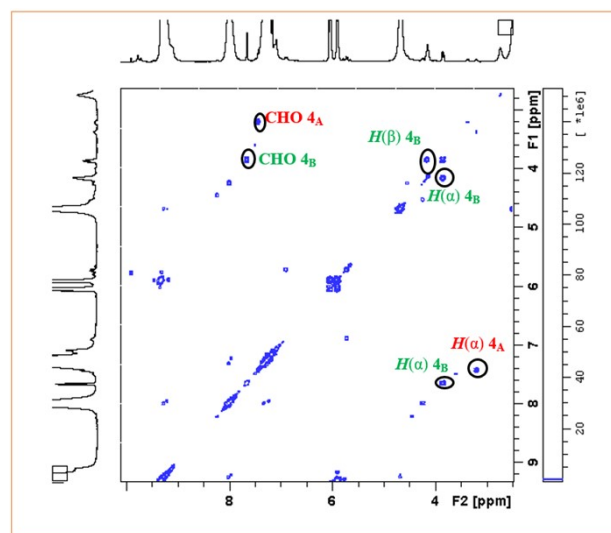

**Figure S15.** Relevant portion of 2D COSY spectrum (400 MHz, C<sub>6</sub>D<sub>6</sub>, 298 K) in Figure S13.

4.2.3 2D HSQC of the mixture of CP<sub>6</sub> and crotonaldehyde 4

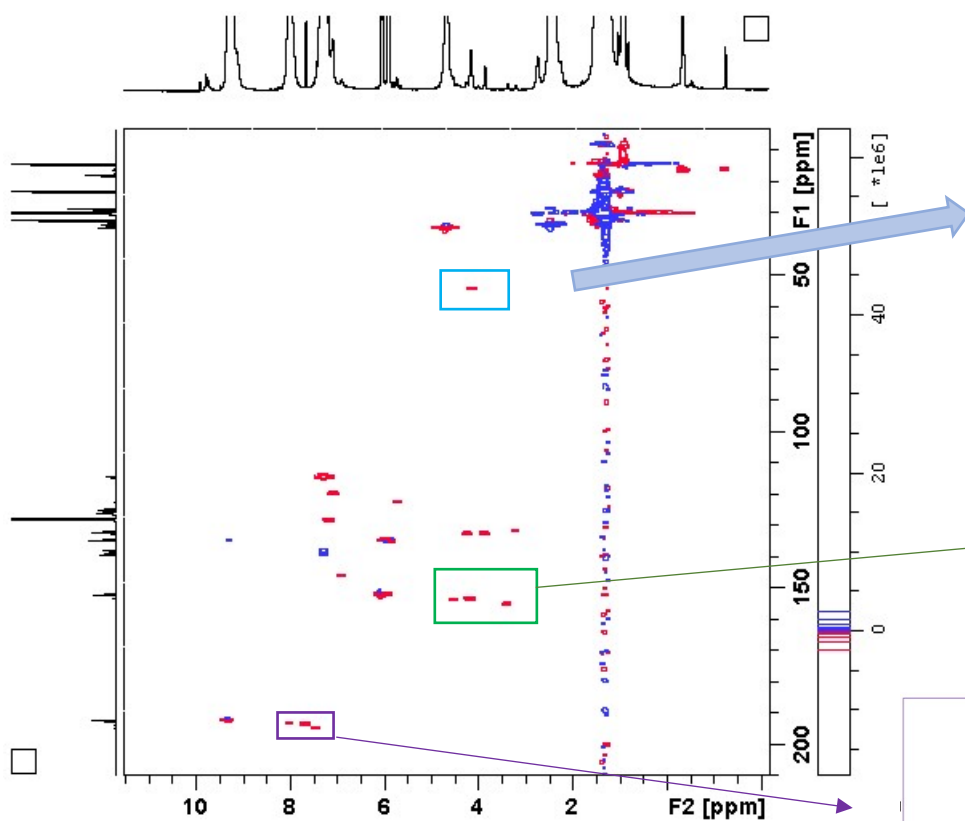

**Figure S16.** 2D HSQC (600 MHz, C<sub>6</sub>D<sub>6</sub>, 298 K) of the mixture of CP<sub>6</sub> (38.6 mM) and crotonaldehyde 4 (15.3 equiv).

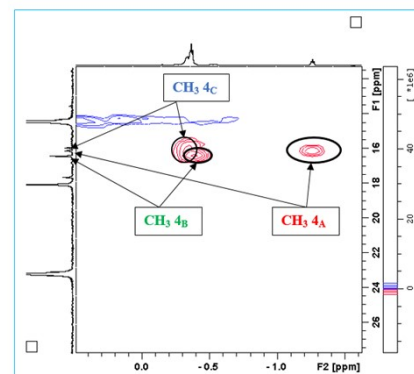

**Figure S17.** Relevant region of 2D HSQC (600 MHz, C<sub>6</sub>D<sub>6</sub>, 298 K) in Figure S16.

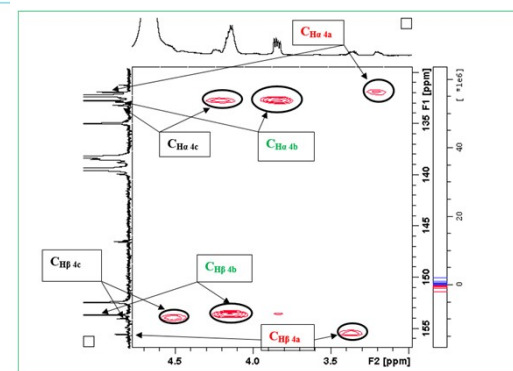

**Figure S18.** Relevant region of 2D HSQC (600 MHz, C<sub>6</sub>D<sub>6</sub>, 298 K) in Figure S16.

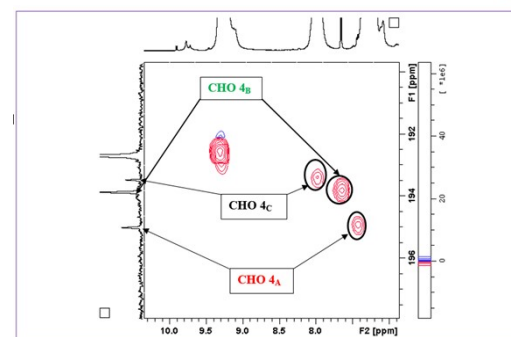

**Figure S19.** Relevant region of 2D HSQC (600 MHz, C<sub>6</sub>D<sub>6</sub>, 298 K) in Figure S16.

4.2.4  $^{13}\text{C}$  NMR of the mixture of  $\text{CP}_6$  and crotonaldehyde **4**

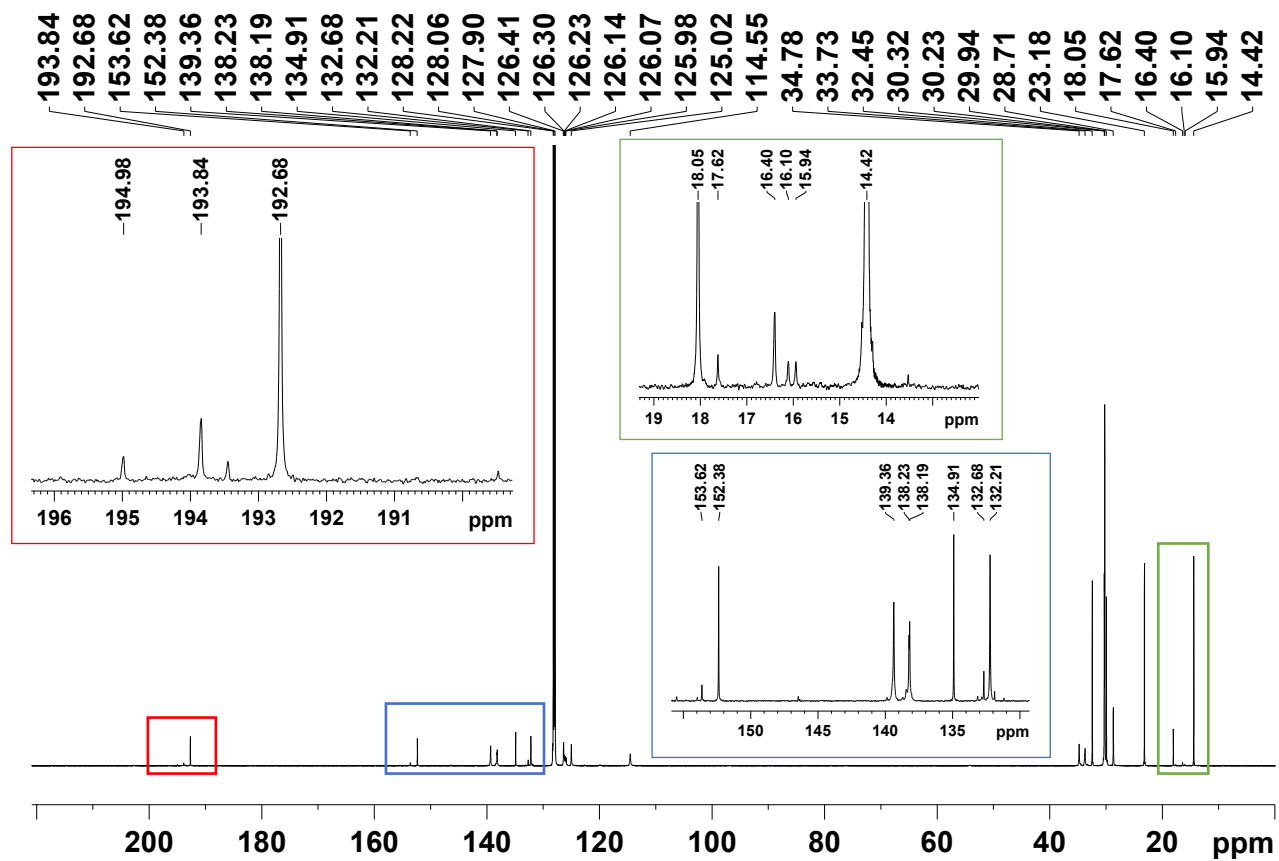

Figure S20.  $^{13}\text{C}$  NMR (100 MHz,  $\text{C}_6\text{D}_6$ , 298K) of the mixture of  $\text{CP}_6$  (38.6 mM) and crotonaldehyde **4** (15.3 equiv).

4.2.4  $^{13}\text{C}$  NMR of the mixture of  $\text{CP}_6$  and crotonaldehyde **4**

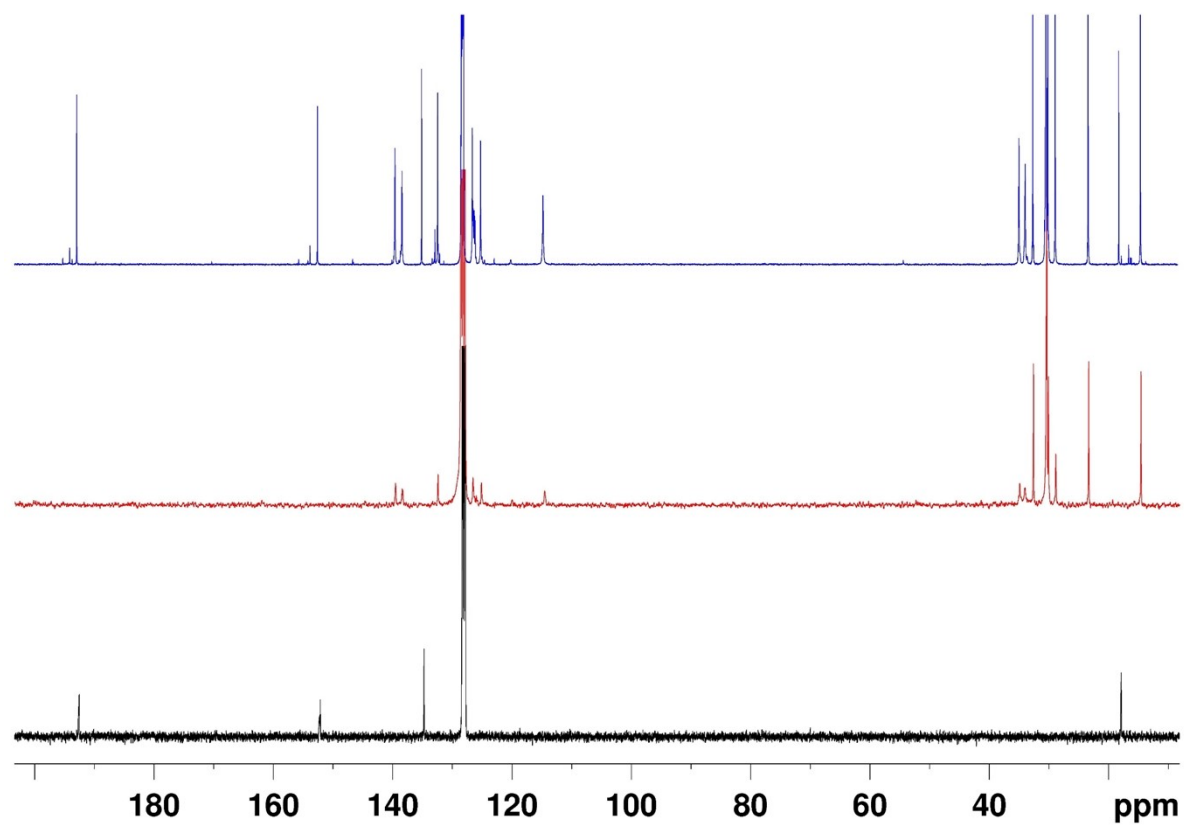

**Figure S21.** Stacked  $^{13}\text{C}$  NMR (100 MHz,  $\text{C}_6\text{D}_6$ , 298K) of (from bottom to top): crotonaldehyde **4**,  $\text{CP}_6$ , and mixture of  $\text{CP}_6$  (38.6 mM) and crotonaldehyde **4** (15.3 equiv).

### 4.3 Diffusion NMR experiments for the encapsulation of crotonaldehyde **4** inside capsule **CP<sub>6</sub>**

Diffusion NMR and DOSY data were collected at 9.4 T, on Avance III Bruker NMR spectrometers, operating at 400.13 MHz for <sup>1</sup>H, equipped with a z-gradient system capable of producing maximal gradient pulses of about 50 G/cm. <sup>1</sup>H-diffusion NMR and DOSY experiments were performed using the eddy currents delays (LED) pulse sequence<sup>1</sup> using sine-shaped pulse gradients incremented from 0.7 to 32.2 G/cm (effective gradient strength:  $G(2/\pi)$ ). The diffusion coefficients were extracted from:  $\ln I/I_0 = -\gamma^2 \delta^2 G^2 (2/\pi)^2 (\Delta - \delta/4) D = -bD$ , where  $I$  and  $I_0$  are the echo intensity in the presence and absence of the gradient pulses, respectively,  $\gamma$  is the gyromagnetic ratio,  $G$  is the pulse gradient strength,  $2/\pi$  is a geometrical correction factor due to the sine shape of the pulse gradients used,  $\delta$  is the duration of the pulse gradient,  $\Delta$  is the time interval between the leading edges of the pulse gradient used, and  $D$  is the diffusion coefficient. All diffusion NMR experiments were performed at 298 K in triplicates. The given values represent means  $\pm$  the standard error of the means (SEM). For routine diffusion NMR and DOSY measurements the sine-shaped pulse gradients were incremented from 0.7 to 32.2 G/cm in 10 steps and  $D$  was set to 50 ms,  $d$  to 6 ms and  $t_e$  to 5 ms unless specified differently. When the dependency of the diffusion time and  $t_e$  was explored the diffusion NMR and DOSY data included at least 28 and 32 gradient steps. Note that diffusion NMR and DOSY data were analyzed using the Bruker software.

**Table S1:** Diffusion coefficients, as deduced from diffusion NMR, of representative signals of **4**, **3**, **CP<sub>6</sub>**, a mixture of **CP<sub>6</sub>** and **4**, and the entire reaction mixture used for catalysis in C<sub>6</sub>D<sub>6</sub> at 298K

| Sample in C <sub>6</sub> D <sub>6</sub>                                                                 |                                         | <sup>c</sup> Diffusion coefficients<br>[x10 <sup>-5</sup> cm <sup>2</sup> s <sup>-1</sup> ] |
|---------------------------------------------------------------------------------------------------------|-----------------------------------------|---------------------------------------------------------------------------------------------|
| Hexameric Capsule of <b>CP<sub>6</sub></b><br>(38.6mM)                                                  | <b>CP<sub>6</sub></b> (4.66ppm)         | 0.07 $\pm$ 0.01 <sup>a</sup>                                                                |
|                                                                                                         | C <sub>6</sub> H <sub>6</sub> (7.16ppm) | 1.18 $\pm$ 0.14 <sup>a</sup>                                                                |
| <b>4</b> (590mM)                                                                                        | <b>4</b> (5.65ppm)                      | 2.60 $\pm$ 0.01 <sup>b</sup>                                                                |
|                                                                                                         | C <sub>6</sub> H <sub>6</sub> (7.16ppm) | 2.29 $\pm$ 0.02 <sup>b</sup>                                                                |
| <b>3</b> (150mM)                                                                                        | <b>3</b> (3.06ppm)                      | 1.50 $\pm$ 0.01 <sup>b</sup>                                                                |
|                                                                                                         | C <sub>6</sub> H <sub>6</sub> (7.16ppm) | 2.41 $\pm$ 0.09 <sup>b</sup>                                                                |
| Hexameric Capsule of <b>CP<sub>6</sub></b><br>(38.6mM) with 12 eq. of <b>4</b><br>(relative to hexamer) | Encapsulated <b>4</b> (-0.34ppm)        | 0.07 $\pm$ 0.01 <sup>a</sup>                                                                |
|                                                                                                         | <b>CP<sub>6</sub></b> (4.66ppm)         | 0.07 $\pm$ 0.01 <sup>a</sup>                                                                |
|                                                                                                         | Free <b>4</b> (6.06ppm)                 | 1.54 $\pm$ 0.01 <sup>a</sup>                                                                |
|                                                                                                         | C <sub>6</sub> H <sub>6</sub> (7.16ppm) | 1.37 $\pm$ 0.01 <sup>a</sup>                                                                |

<sup>a</sup> $\Delta/\delta/t_e = 50/6/5$ ms. <sup>b</sup> $\Delta/\delta/t_e = 30/2/5$ ms. <sup>c</sup>The diffusion coefficients are means  $\pm$  standard error of the mean (SEM) of at least three independent measurements. In all measurements only 10 gradient values were collected and a single component fit function was used to analyze the diffusion data.

**Table S2:** Diffusion coefficients at different  $\Delta$  and  $t_e$ -values, as deduced from diffusion NMR, of representative signals of the mixture of hexameric capsule of **CP<sub>6</sub>** (38.6mM), **4** (590mM), **3** (150mM), L-proline (29.7mM) in C<sub>6</sub>D<sub>6</sub> solution with 4 $\mu$ l of C<sub>6</sub>H<sub>6</sub>.

| Diffusion time ( $\Delta$ ) | peak (ppm)                            | <sup>a</sup> Diffusion coefficients<br>[ $\times 10^{-5}$ cm <sup>2</sup> s <sup>-1</sup> ] |                    |                 |
|-----------------------------|---------------------------------------|---------------------------------------------------------------------------------------------|--------------------|-----------------|
|                             |                                       | $t_e=5\text{ms}$                                                                            | $t_e=250\text{ms}$ | $t_e=1\text{s}$ |
| 15ms                        | -1.2 (encapsulated <b>4</b> )         | 0.07 $\pm$ 0.01                                                                             | 0.08 $\pm$ 0.01    | 0.17 $\pm$ 0.01 |
|                             | -0.34 (encapsulated <b>4</b> )        | 0.07 $\pm$ 0.01                                                                             | 0.18 $\pm$ 0.01    | 0.56 $\pm$ 0.02 |
|                             | 0.93 ( <b>CP<sub>6</sub></b> )        | 0.06 $\pm$ 0.01                                                                             | 0.07 $\pm$ 0.01    | 0.07 $\pm$ 0.01 |
|                             | 4.66 ( <b>CP<sub>6</sub></b> )        | 0.07 $\pm$ 0.01                                                                             | 0.07 $\pm$ 0.01    | 0.09 $\pm$ 0.01 |
|                             | 6.06 ( <b>4</b> )                     | 1.54 $\pm$ 0.03                                                                             | 1.34 $\pm$ 0.01    | 1.07 $\pm$ 0.02 |
|                             | 7.16 (C <sub>6</sub> H <sub>6</sub> ) | 1.19 $\pm$ 0.03                                                                             | 1.18 $\pm$ 0.01    | 1.25 $\pm$ 0.04 |
| 50ms                        | -1.2 (encapsulated <b>4</b> )         | 0.07 $\pm$ 0.01                                                                             | 0.07 $\pm$ 0.01    | 0.10 $\pm$ 0.01 |
|                             | -0.34 (encapsulated <b>4</b> )        | 0.06 $\pm$ 0.01                                                                             | 0.10 $\pm$ 0.01    | 0.37 $\pm$ 0.04 |
|                             | 0.93 ( <b>CP<sub>6</sub></b> )        | 0.07 $\pm$ 0.01                                                                             | 0.07 $\pm$ 0.01    | 0.07 $\pm$ 0.01 |
|                             | 4.66 ( <b>CP<sub>6</sub></b> )        | 0.07 $\pm$ 0.01                                                                             | 0.07 $\pm$ 0.01    | 0.08 $\pm$ 0.01 |
|                             | 6.06 ( <b>4</b> )                     | 1.52 $\pm$ 0.01                                                                             | 1.39 $\pm$ 0.01    | 1.16 $\pm$ 0.03 |
|                             | 7.16 (C <sub>6</sub> H <sub>6</sub> ) | 1.26 $\pm$ 0.02                                                                             | 1.29 $\pm$ 0.04    | 1.29 $\pm$ 0.02 |
| 100ms                       | -1.2 (encapsulated <b>4</b> )         | 0.06 $\pm$ 0.01                                                                             | 0.07 $\pm$ 0.01    | 0.09 $\pm$ 0.01 |
|                             | -0.34 (encapsulated <b>4</b> )        | 0.06 $\pm$ 0.01                                                                             | 0.09 $\pm$ 0.02    | 0.50 $\pm$ 0.02 |
|                             | 0.93 ( <b>CP<sub>6</sub></b> )        | 0.07 $\pm$ 0.01                                                                             | 0.07 $\pm$ 0.01    | 0.07 $\pm$ 0.01 |
|                             | 4.66 ( <b>CP<sub>6</sub></b> )        | 0.07 $\pm$ 0.01                                                                             | 0.07 $\pm$ 0.01    | 0.07 $\pm$ 0.01 |
|                             | 6.06 ( <b>4</b> )                     | 1.46 $\pm$ 0.01                                                                             | 1.40 $\pm$ 0.01    | 1.23 $\pm$ 0.01 |
|                             | 7.16 (C <sub>6</sub> H <sub>6</sub> ) | 1.26 $\pm$ 0.01                                                                             | 1.30 $\pm$ 0.02    | 1.33 $\pm$ 0.05 |
| 200ms                       | -1.2 (encapsulated <b>4</b> )         | 0.06 $\pm$ 0.01                                                                             | 0.06 $\pm$ 0.01    | 0.09 $\pm$ 0.04 |
|                             | -0.34 (encapsulated <b>4</b> )        | 0.06 $\pm$ 0.01                                                                             | 0.08 $\pm$ 0.01    | 0.72 $\pm$ 0.06 |
|                             | 0.93 ( <b>CP<sub>6</sub></b> )        | 0.07 $\pm$ 0.01                                                                             | 0.07 $\pm$ 0.01    | 0.07 $\pm$ 0.01 |
|                             | 4.66 ( <b>CP<sub>6</sub></b> )        | 0.06 $\pm$ 0.01                                                                             | 0.07 $\pm$ 0.01    | 0.08 $\pm$ 0.01 |
|                             | 6.06 ( <b>4</b> )                     | 1.44 $\pm$ 0.01                                                                             | 1.38 $\pm$ 0.01    | 1.28 $\pm$ 0.03 |
|                             | 7.16 (C <sub>6</sub> H <sub>6</sub> ) | 1.29 $\pm$ 0.04                                                                             | 1.28 $\pm$ 0.05    | 1.29 $\pm$ 0.03 |

<sup>a</sup>The diffusion coefficients are mean  $\pm$  standard error of the mean (SEM) of at least three independent measurements. In all measurements only 10 gradient values were collected and a single component fit function was used to fit the data.

The data presented in Tables S1 and S2 clearly show that the diffusion coefficient of only one of the signals at high field (i.e., the signal at -0.34 ppm) is sensitive to the  $t_e$ -values and appear to increase with the increase in  $t_e$ . Some smaller changes, in the opposite direction, are observed for the signal at ~6.0 ppm attributed to unbound **4**. All these results are consistent with exchange of magnetization between two pools that differ considerably in their diffusion coefficients. Based on these results we decided to repeat the diffusion NMR and DOSY measurements with significantly more gradient values to allow for reliable fitting the diffusion data by two component fitting function.

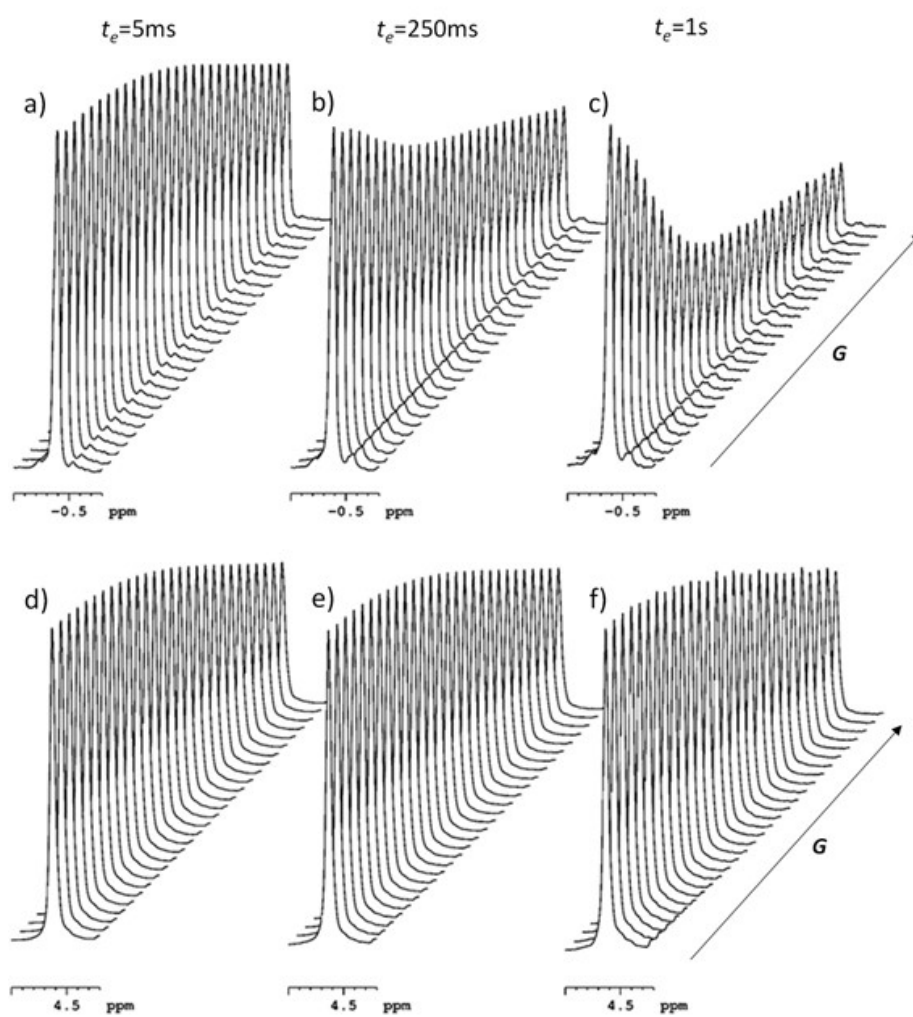

**Figure S22.** Signal decay of the peaks of a mixture of **4** and **CP<sub>6</sub>** as a function of gradient strength (G) at three  $t_e$  values for one peak of **CP<sub>6</sub>** (d-f) and one peak attributed to bound aldehydes (a-c) at different  $t_e$  values.

## 4.4 Encapsulation experiments of nitrone **3** inside capsule **CP**<sub>6</sub>

### 4.4.1 <sup>1</sup>H NMR spectra of mixture of **CP**<sub>6</sub> and nitrone **3**

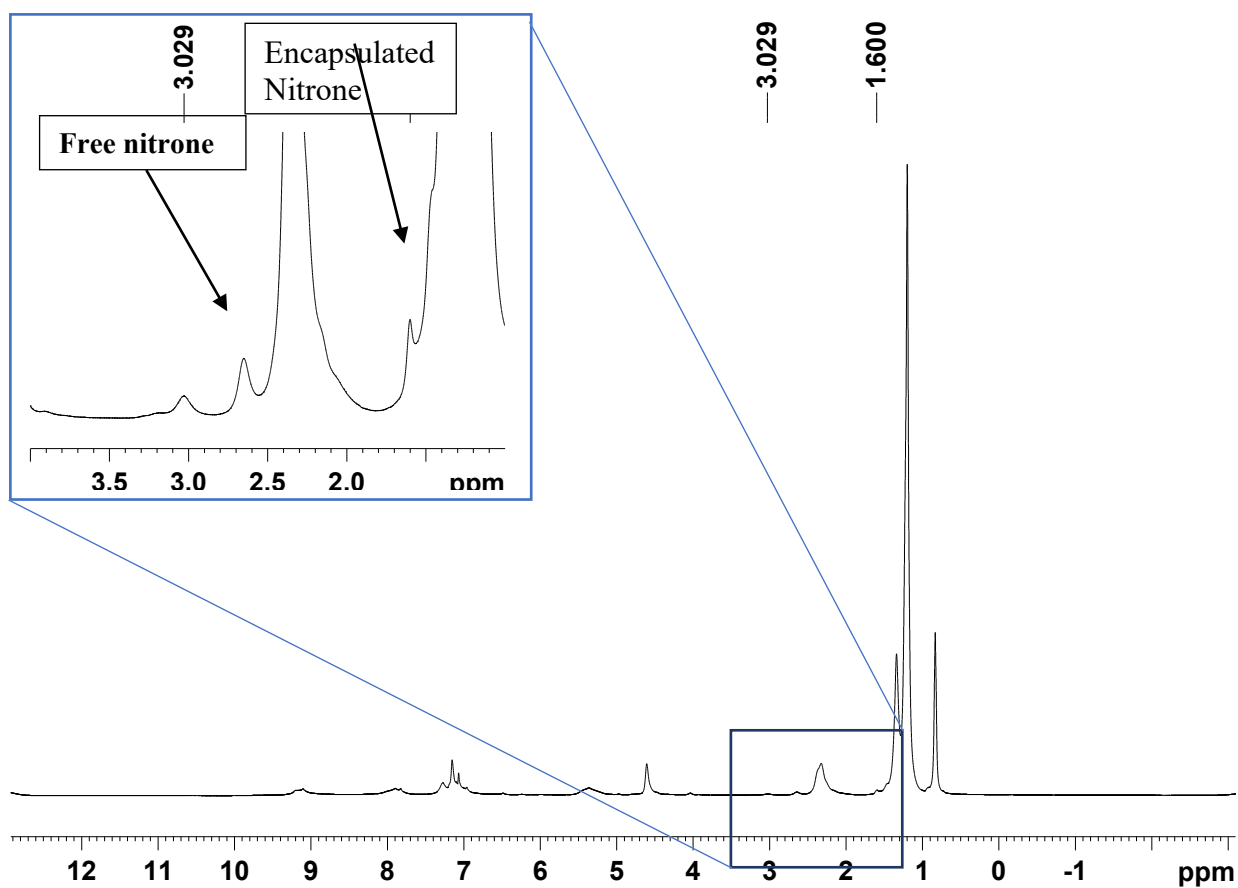

**Figure S23.** <sup>1</sup>H NMR spectrum (400 MHz,  $C_6D_6$ , 298K) of mixture of **CP**<sub>6</sub> (38.6 mM) and nitrone **3** (148 mM, 3.8 equiv) in  $C_6D_6$  (0.55 mL). A blue inset, showing free and encapsulated guest **3**, is present.



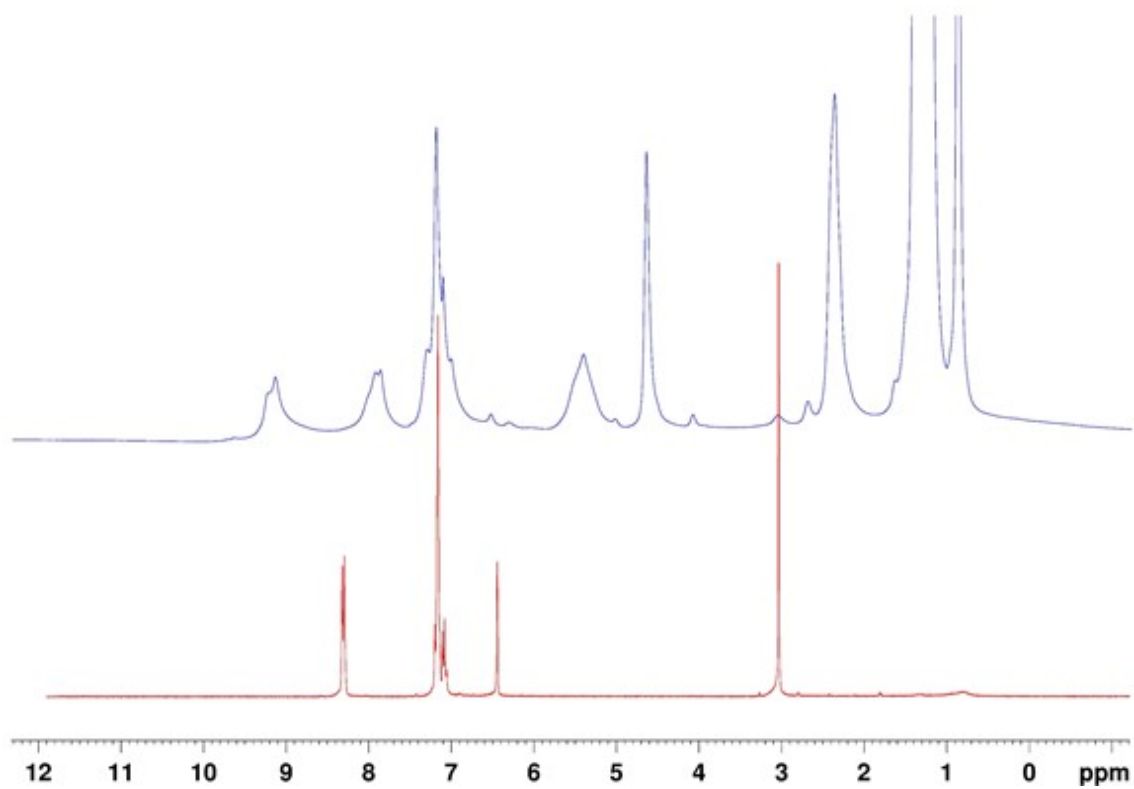

**Figure S24.** Stacked <sup>1</sup>H NMR spectra (400 MHz, C<sub>6</sub>D<sub>6</sub>, 298 K) of nitrone **3** (bottom) and mixture of CP<sub>6</sub> (38.6 mM) and nitrone **3** (148 mM, 3.8 equiv) in C<sub>6</sub>D<sub>6</sub> (0.55 mL).

4.4.2 2D EXSY NMR of mixture of CP<sub>6</sub> and nitrone 3

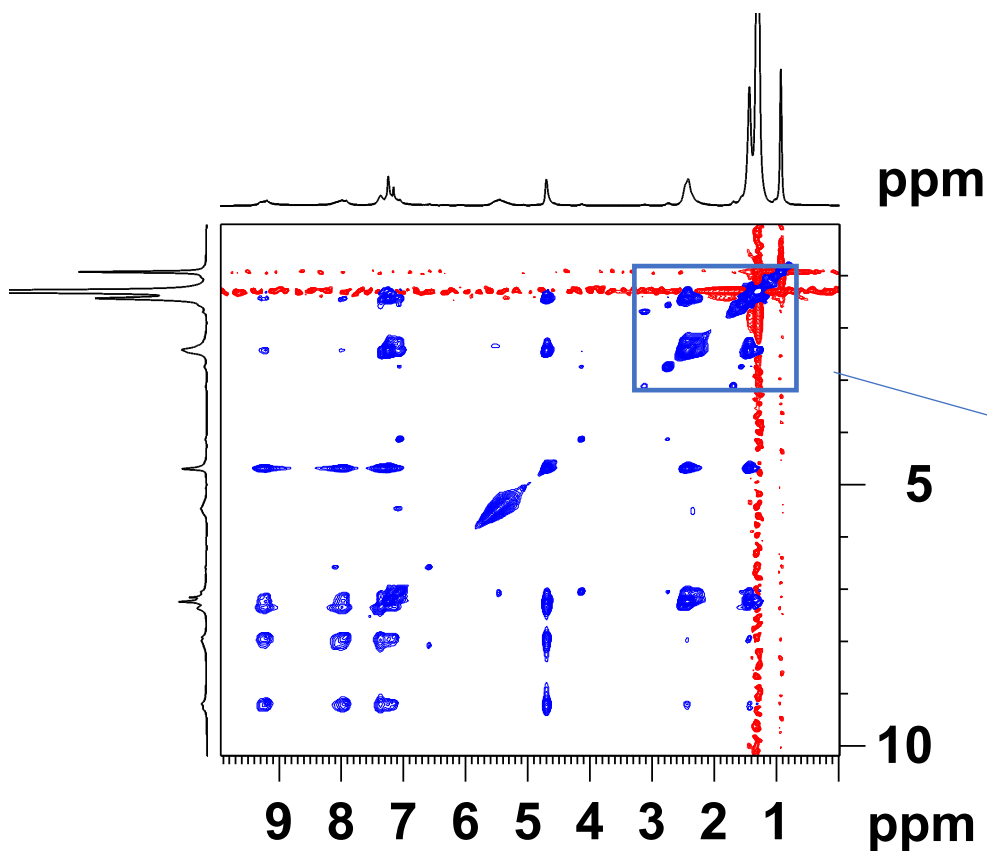

**Figure S25.** 2D EXSY NMR (600 MHz, 298 K, C<sub>6</sub>D<sub>6</sub>, d8 = 250 ms) of mixture of CP<sub>6</sub> (38.6 mM) and nitrone 3 (148 mM, 3.8 equiv) in C<sub>6</sub>D<sub>6</sub> (0.55 mL).

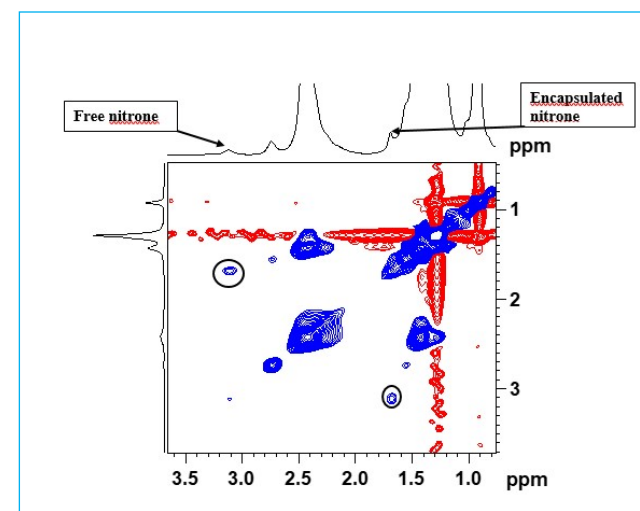

**Figure S26.** Relevant region of 2D EXSY NMR in **Figure S25**. Exchange cross peaks between free and encapsulated nitrone 3 are visible.

4.4.3  $^{13}\text{C}$  NMR spectrum of nitrone **3**

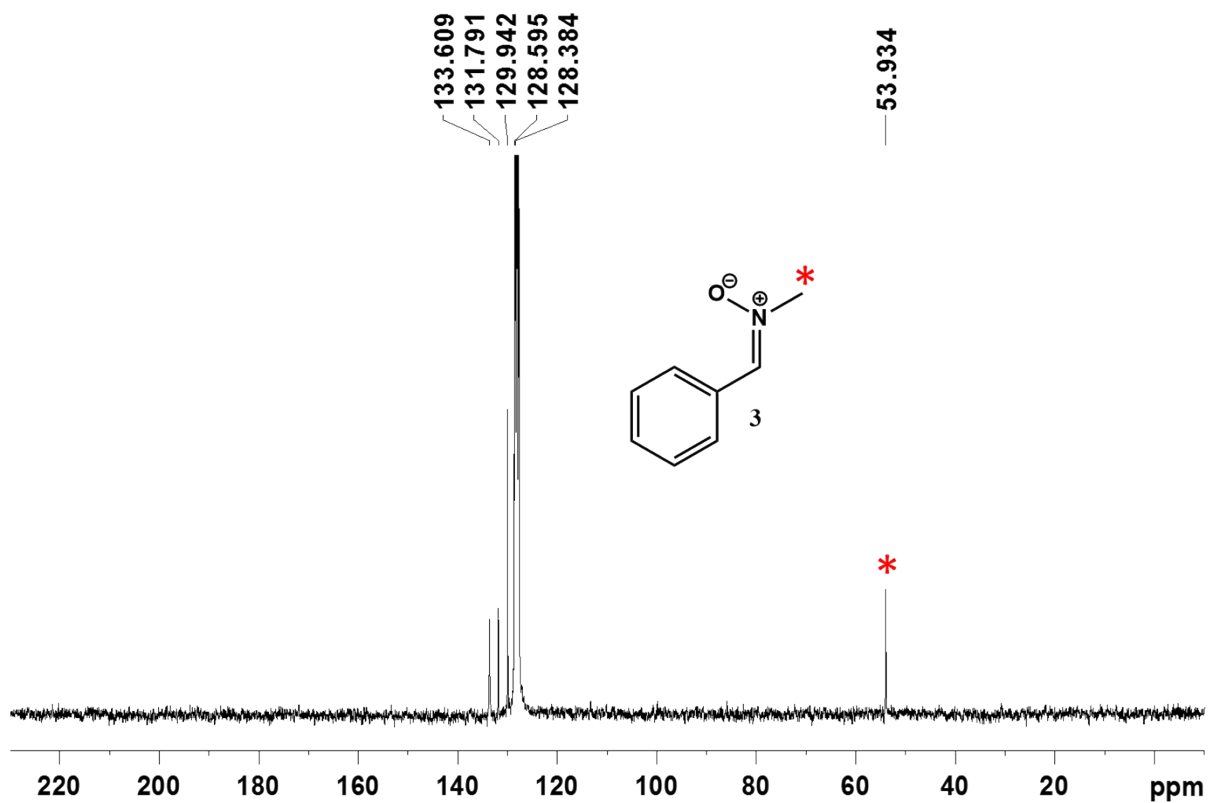

**Figure S27.**  $^{13}\text{C}$  NMR (75 MHz,  $\text{C}_6\text{D}_6$ , 298K) of nitrone **3**.  $^{13}\text{C}$  NMR signal attributable to methyl carbon is evidenced with a red asterisk.

4.4.4  $^{13}\text{C}$  NMR spectrum of mixture of  $\text{CP}_6$  and nitrone **3**

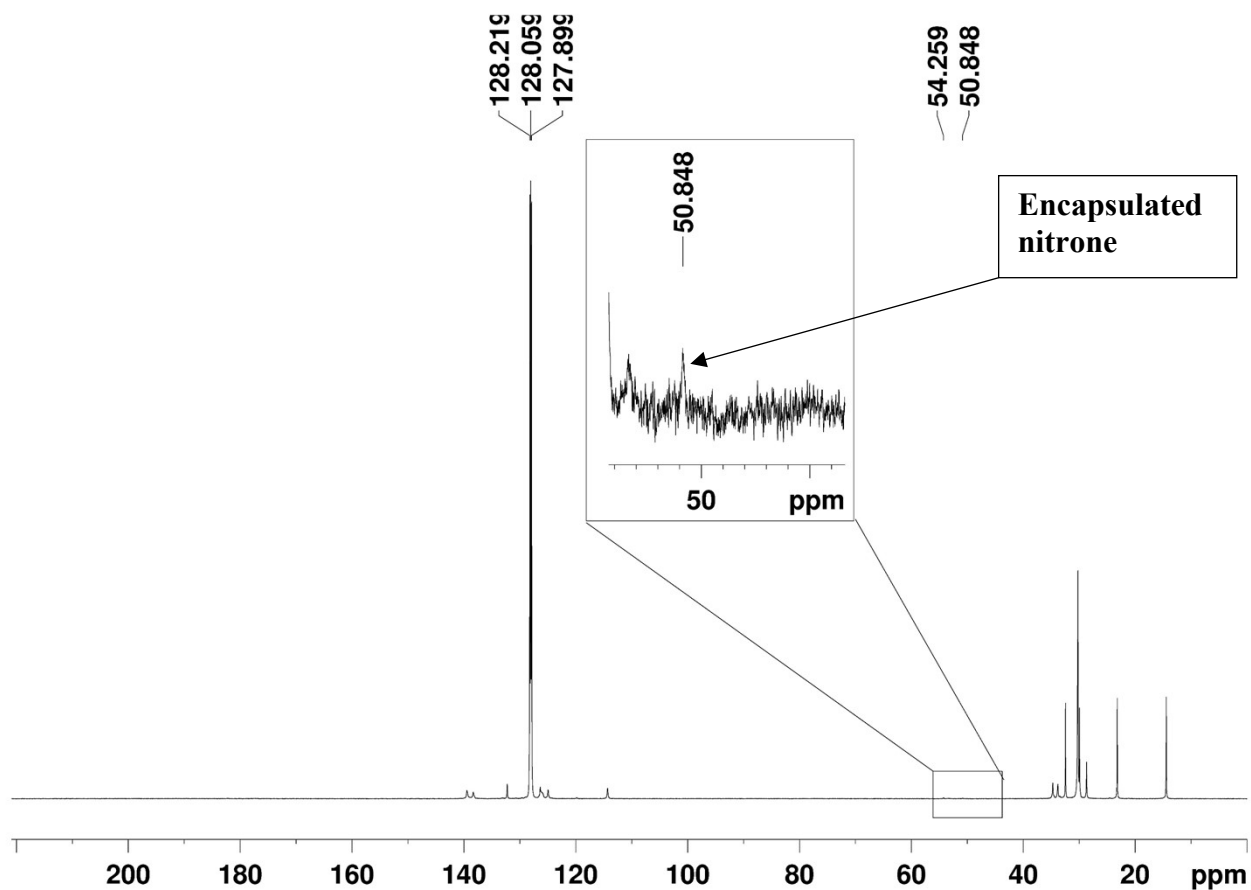

**Figure S28.**  $^{13}\text{C}$  NMR (75 MHz,  $\text{C}_6\text{D}_6$ , 298 K) of mixture of  $\text{CP}_6$  (38.6 mM) and nitrone **3** (148 mM, 3.8 equiv) in  $\text{C}_6\text{D}_6$  (0.55 mL). An inset showing methyl signal of encapsulated nitrone is present.

#### 4.4.5 2D HSQC NMR of mixture of CP<sub>6</sub> and nitrone 3

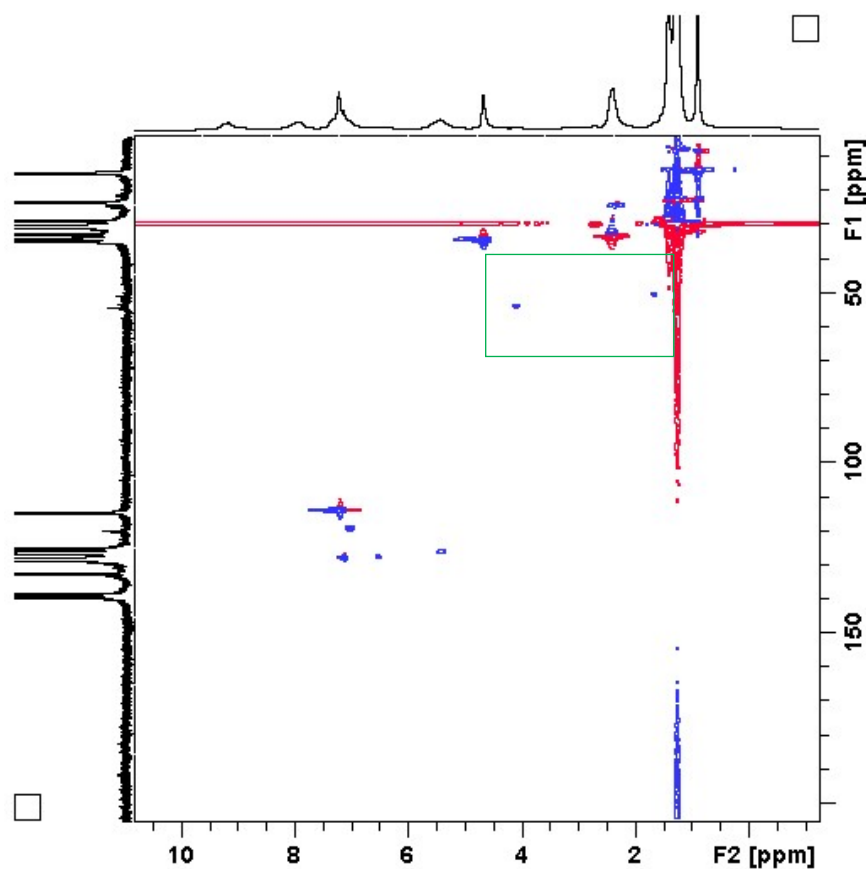

**Figure S29.** 2D HSQC NMR (600 MHz, C<sub>6</sub>D<sub>6</sub>, 298 K) of the mixture of CP<sub>6</sub> (38.6 mM) and nitrone 3 (148 mM, 3.8 equiv) in C<sub>6</sub>D<sub>6</sub> (0.55 mL).

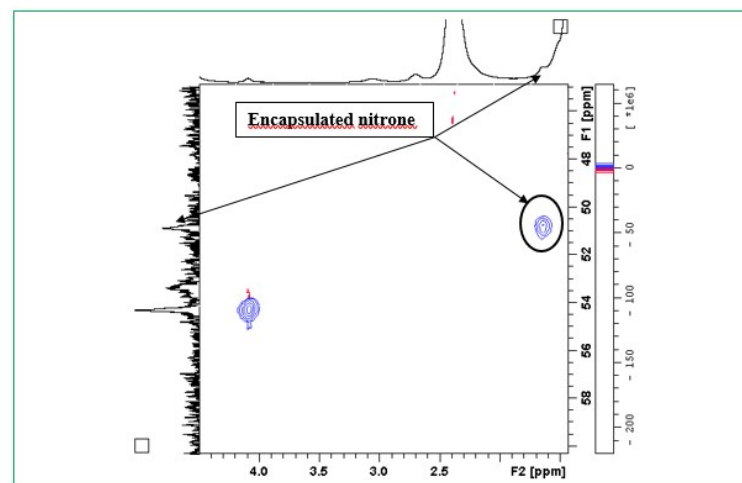

**Figure S30.** Relevant portion of 2D HSQC NMR (600 MHz, C<sub>6</sub>D<sub>6</sub>, 298 K) of the mixture of CP<sub>6</sub> (38.6 mM) and nitrone 3 (148 mM, 3.8 equiv) in C<sub>6</sub>D<sub>6</sub> (0.55 mL).

#### 4.4.6 2D DOSY NMR of mixture of CP<sub>6</sub> and nitrone 3

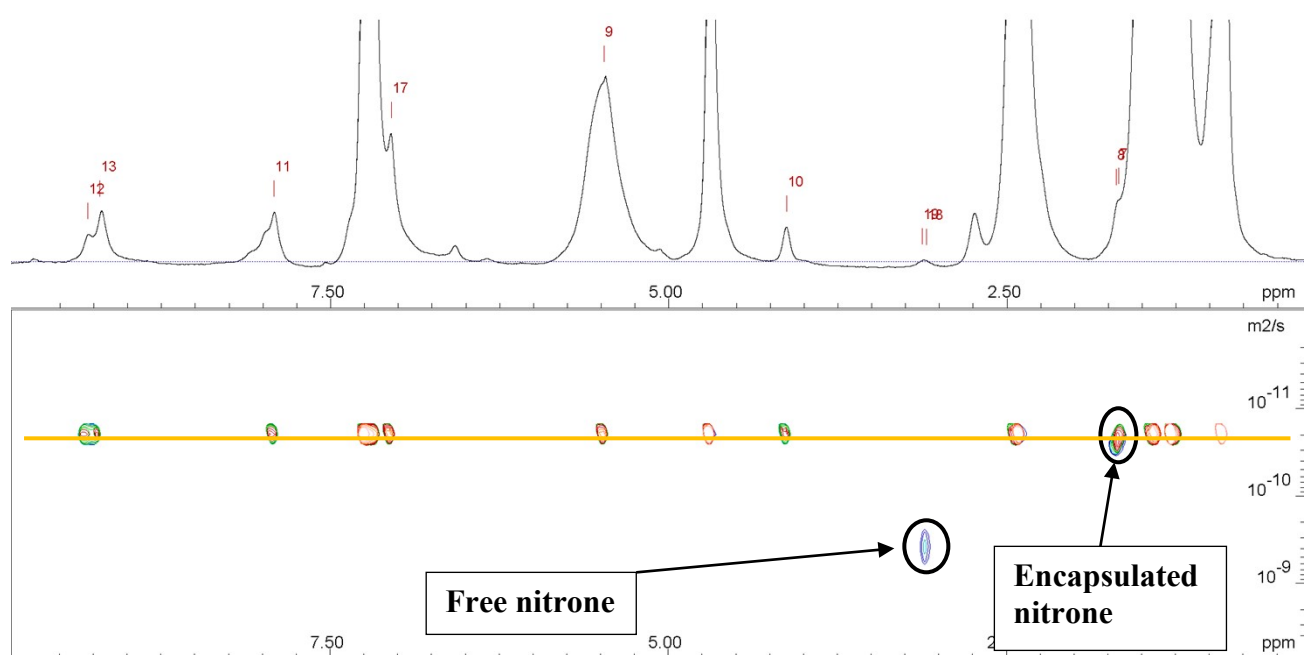

**Figure S31.** 2D DOSY NMR (600 MHz, C<sub>6</sub>D<sub>6</sub>, 298 K, p<sub>30</sub> = 1400 μs) of the mixture of CP<sub>6</sub> (38.6 mM) and nitrone **3** (148 mM, 3.8 equiv) in C<sub>6</sub>D<sub>6</sub> (0.55 mL). Free and encapsulated guest are evidenced.

## 4.5 Encapsulation L-proline inside capsule $CP_6$

### 4.5.1 $^1H$ NMR spectrum of mixture of $CP_6$ and L-proline

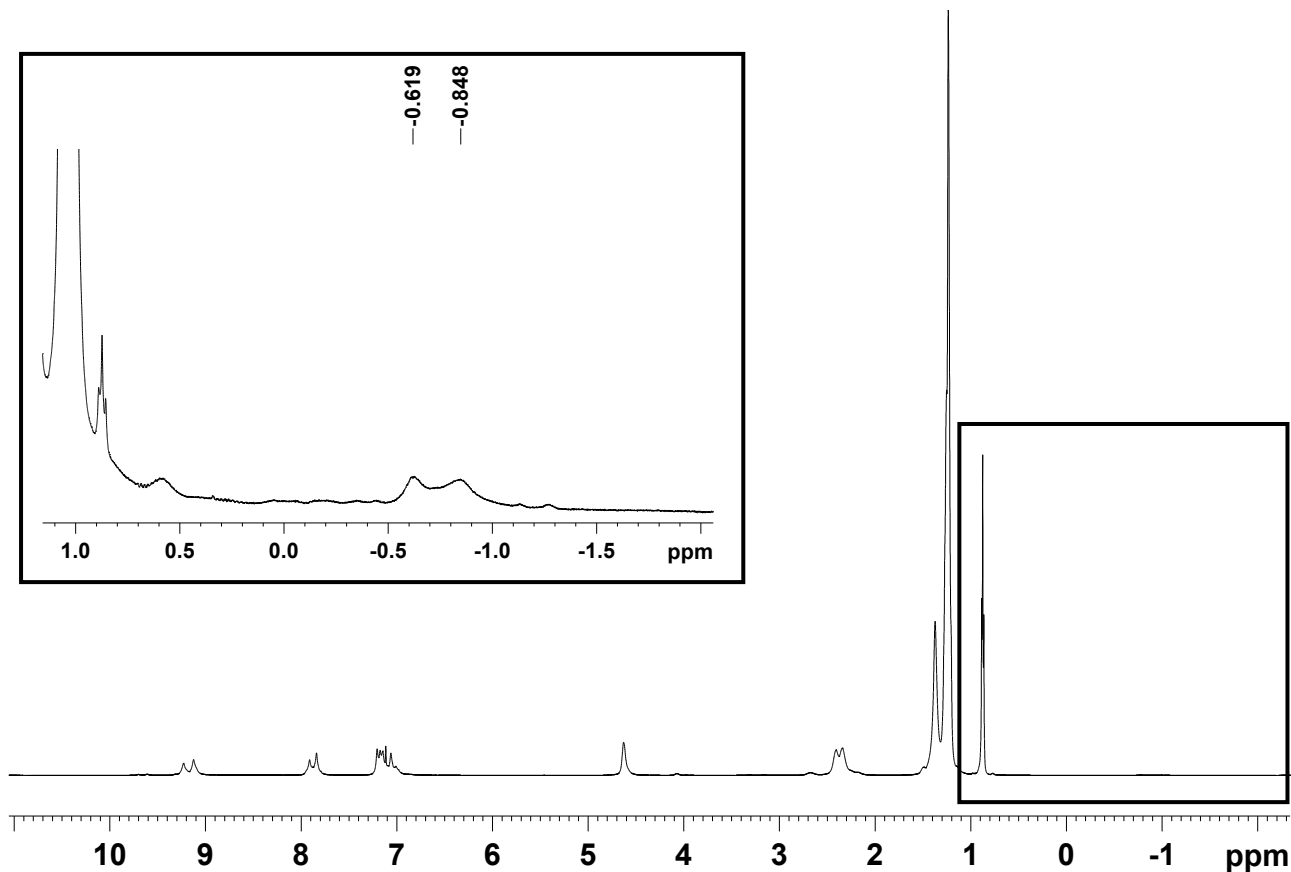

**Figure S32.**  $^1H$  NMR (600 MHz,  $C_6D_6$ , 298 K) of the mixture of  $CP_6$  (38.6 mM) and L-proline (50.2 mM, 1.3 equiv) in  $C_6D_6$  (0.55 mL). Inset showing signals attributable to the encapsulated guest is present.

#### 4.5.2 2D HSQC NMR of mixture of CP<sub>6</sub> and L-proline

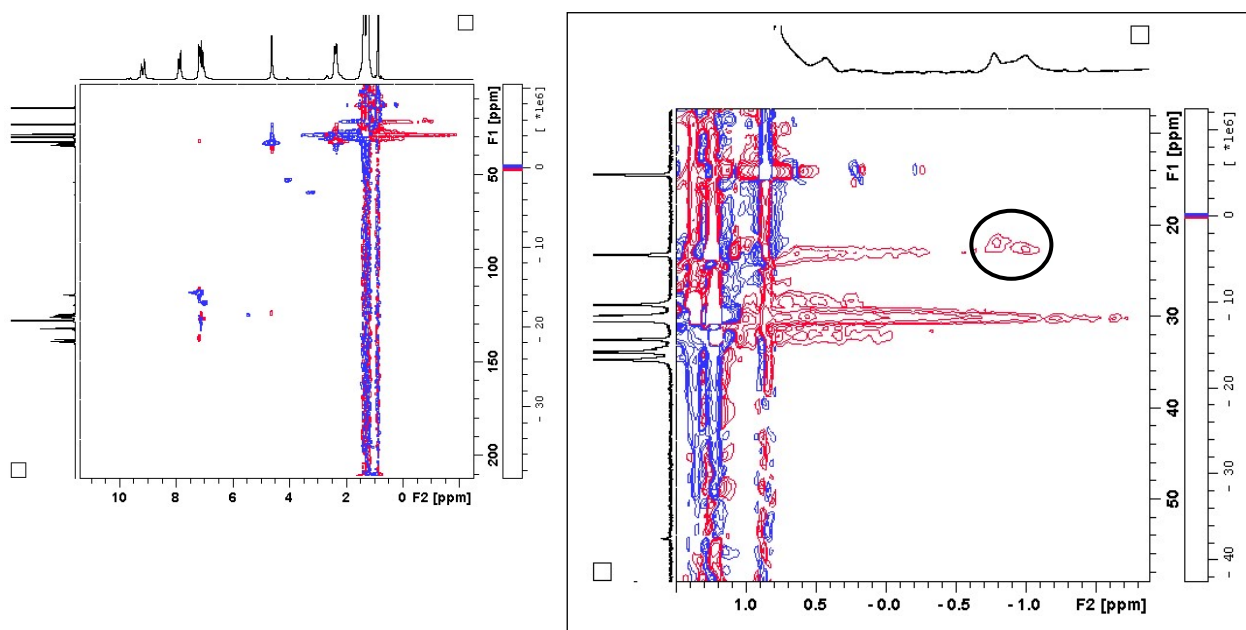

**Figure S33.** 2D HSQC NMR (600 MHz, C<sub>6</sub>D<sub>6</sub>, 298 K) of the mixture of CP<sub>6</sub> (38.6 mM) and L-proline (50.2 mM, 1.3 equiv) in C<sub>6</sub>D<sub>6</sub> (0.55 mL). Inset showing cross-peak signal attributable to the encapsulated guest is present.



### 4.5.3 2D DOSY NMR of mixture of $\text{CP}_6$ and L-proline

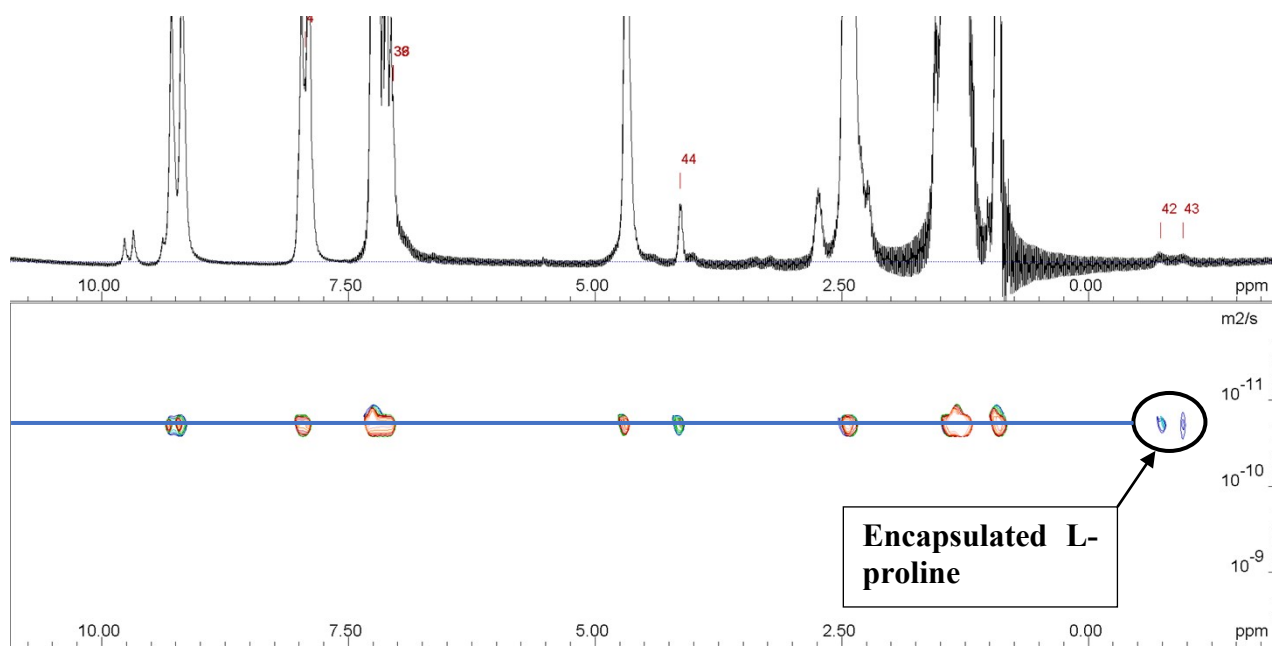

**Figure S34.** 2D DOSY NMR (600 MHz,  $\text{C}_6\text{D}_6$ , 298 K,  $p_{30} = 1400 \mu\text{s}$ ) of the mixture of  $\text{CP}_6$  (38.6 mM) and L-proline (50.2 mM, 1.3 equiv.) in  $\text{C}_6\text{D}_6$  (0.55 mL). Free and encapsulated guest are evidenced.

## 4.6 Encapsulation of iminium species inside capsule $CP_6$

### 4.6.1 $^1H$ NMR spectra of mixture of $CP_6$ , L-proline, and crotonaldehyde

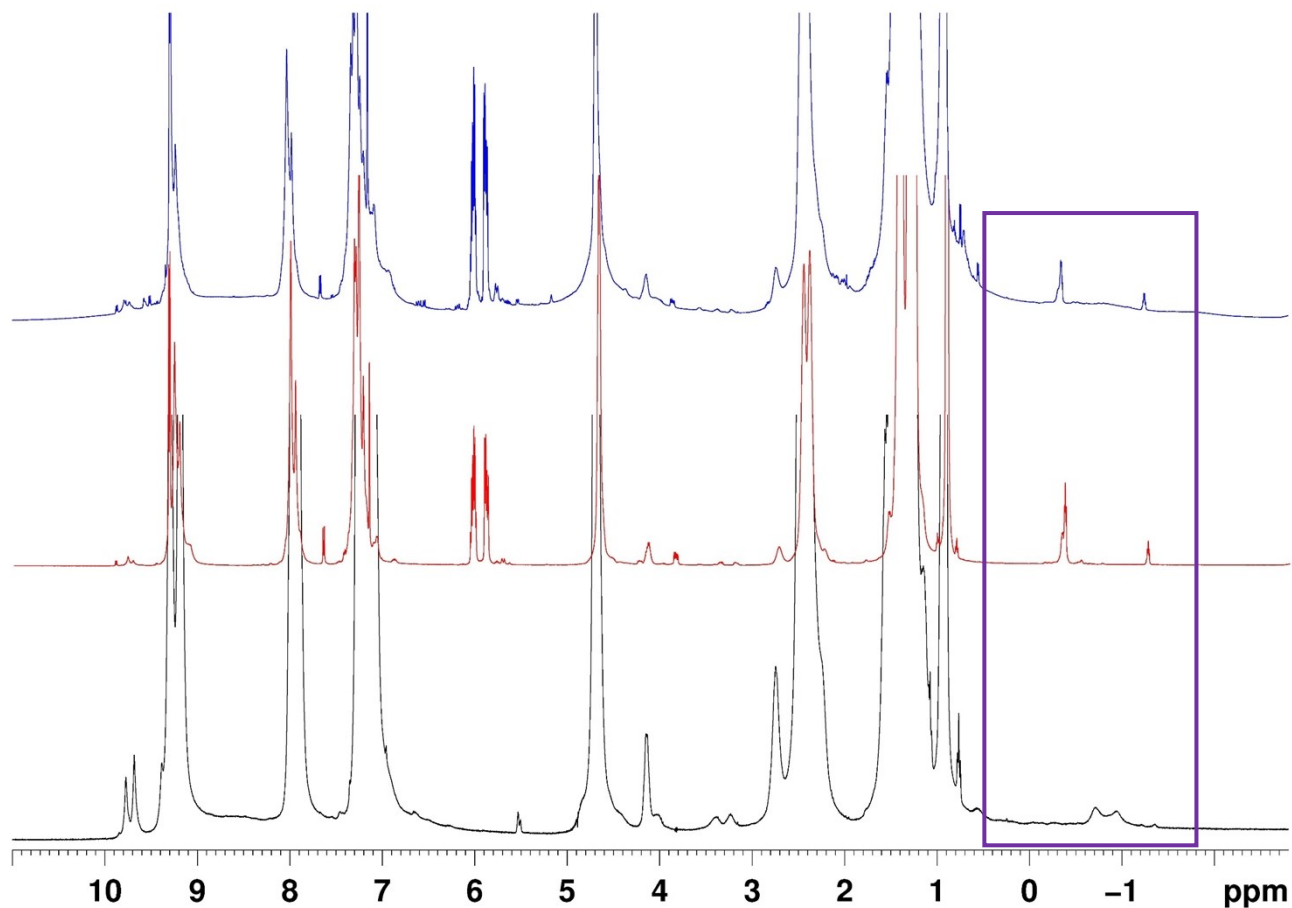

**Figure S35.** Stacked  $^1H$  NMR spectra (600 MHz,  $C_6D_6$ , 298 K) of mixture of  $CP_6$  (38.6 mM) and L-proline (50.2 mM, 1.3 equiv.) (bottom), mixture of  $CP_6$  (38.6 mM) and crotonaldehyde **4** (591 mM, 15.3 equiv) (middle); mixture of  $CP_6$  (38.6 mM), L-proline (50.2 mM, 1.3 equiv.), and crotonaldehyde **4** (591 mM, 15.3 equiv.) (top) in  $C_6D_6$  (0.55 mL).

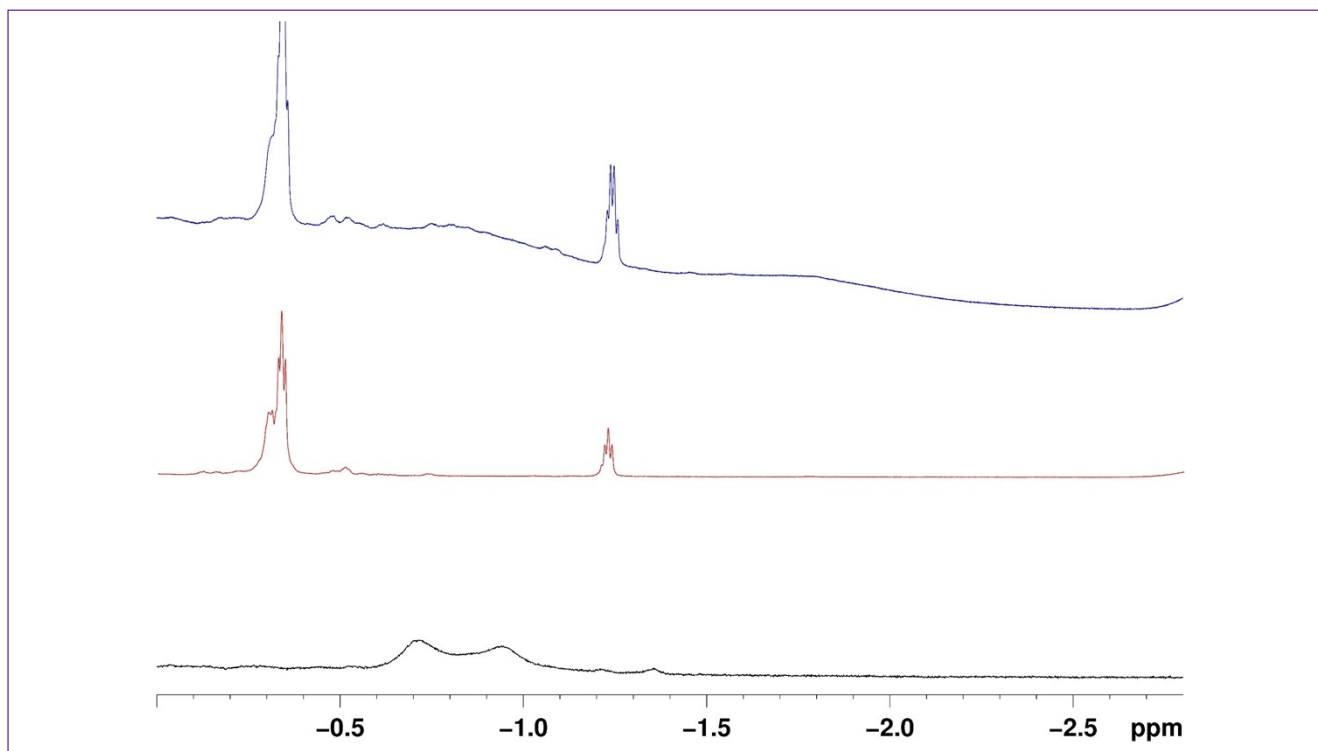

**Figure S36.** High field region of the spectrum in Figure S36. A new set of signals, arising from the presence of iminium species inside the nanocontainer  $\text{CP}_6$ , is evidenced.

#### 4.6.2 2D DOSY NMR of mixture of $\text{CP}_6$ , L-proline, and crotonaldehyde

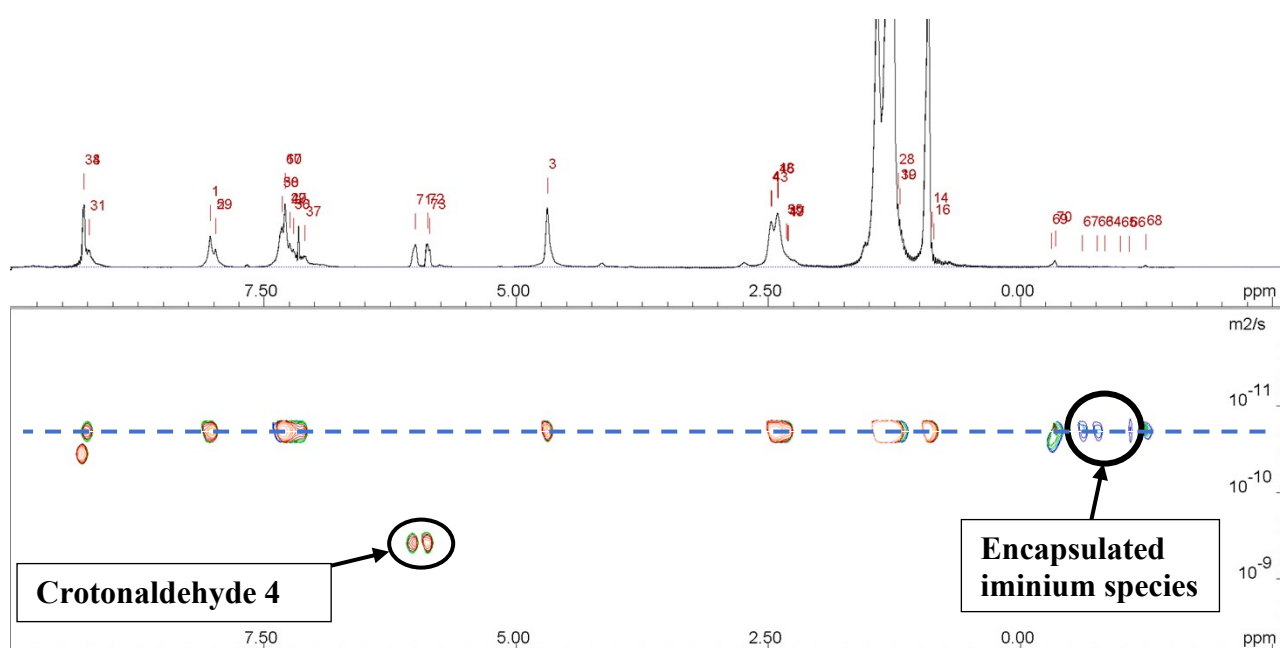

**Figure S37.** 2D DOSY NMR spectrum (600 MHz,  $\text{C}_6\text{D}_6$ , 298 K,  $p_{30} = 1400 \mu\text{s}$ ) for the mixture of  $\text{CP}_6$  (38.6 mM), L-proline (50.2 mM, 1.3 equiv.), and crotonaldehyde **4** (591 mM, 15.3 equiv.) in  $\text{C}_6\text{D}_6$  (0.55 mL).

## 5. <sup>1</sup>H NMR Spectra of the products arising from the 1,3-dipolar cycloaddition reactions and of reduced cycloadducts

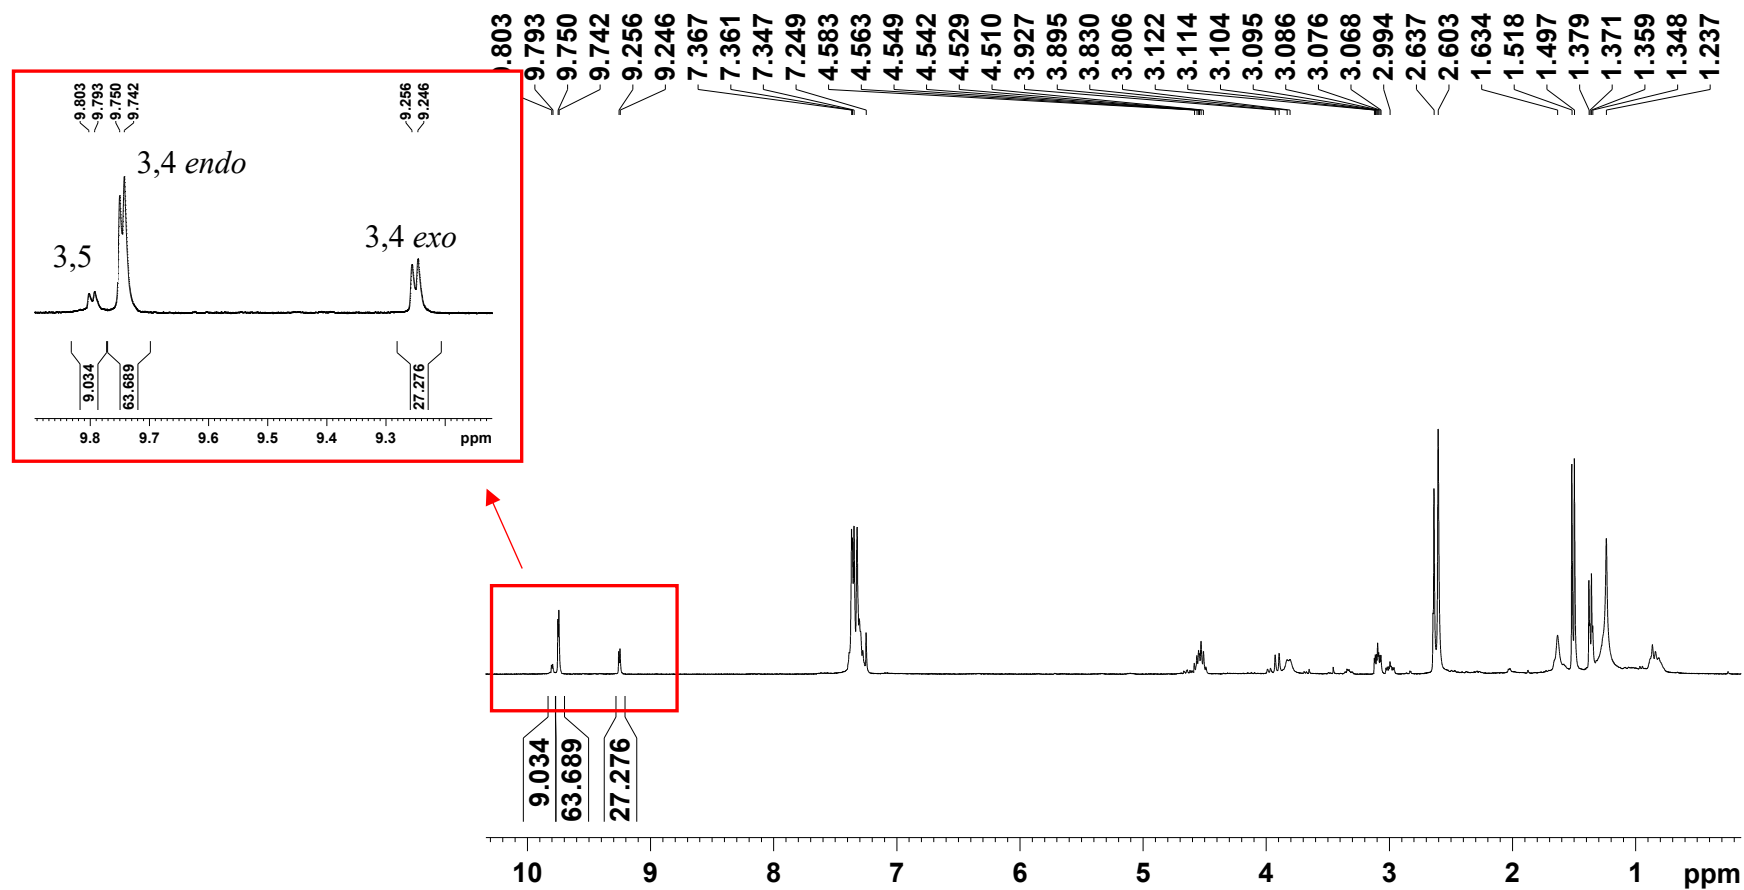

Figure S38. <sup>1</sup>H NMR spectrum (300 MHz, CDCl<sub>3</sub>, 298 K) for entry 1, Table 1.

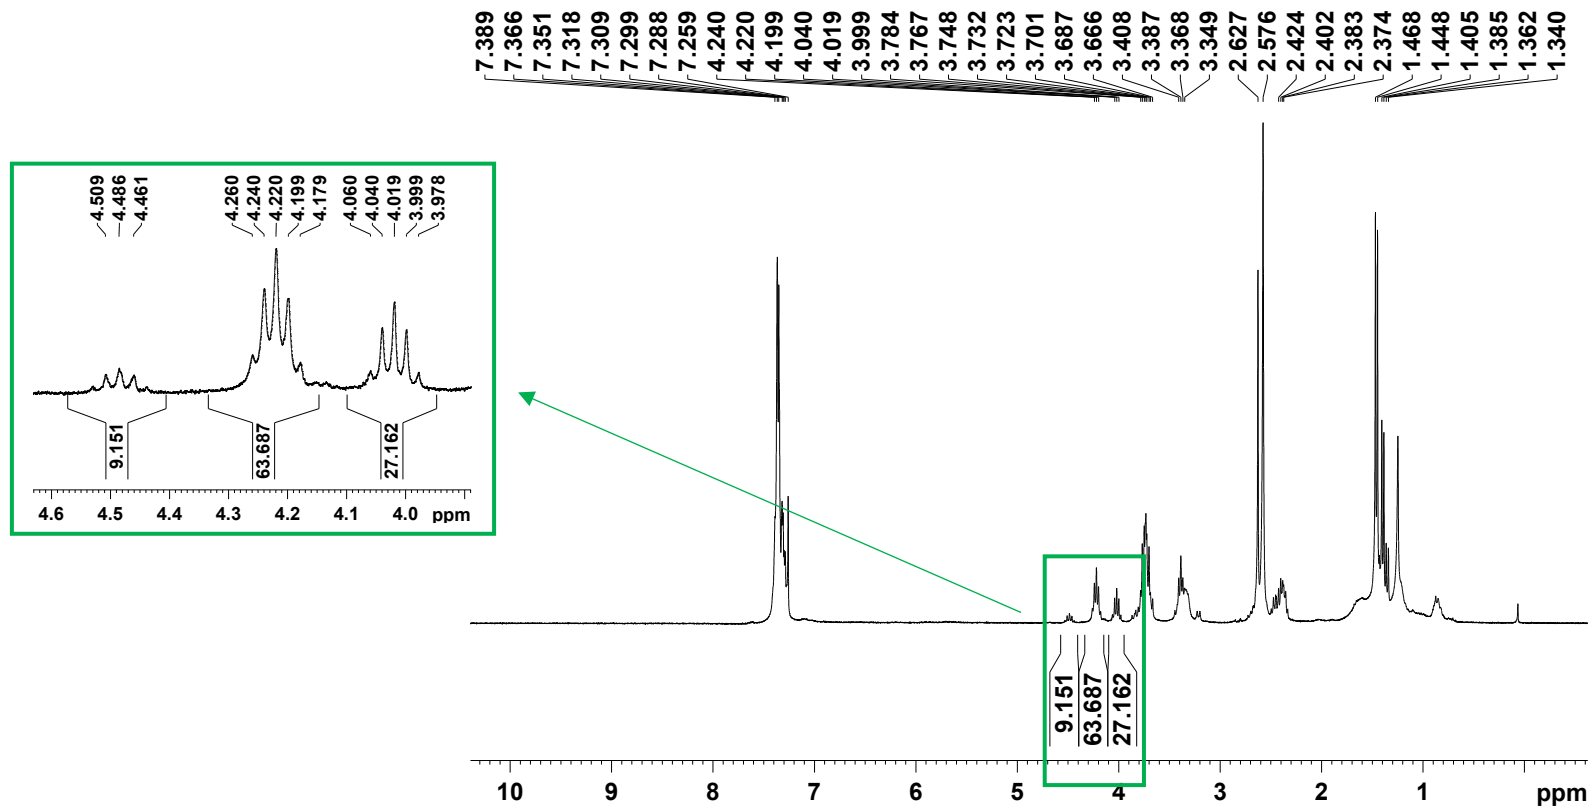

**Figure S39.** <sup>1</sup>H NMR spectrum (300 MHz, CDCl<sub>3</sub>, 298 K) of the reduced mixture for entry 1, Table 1.

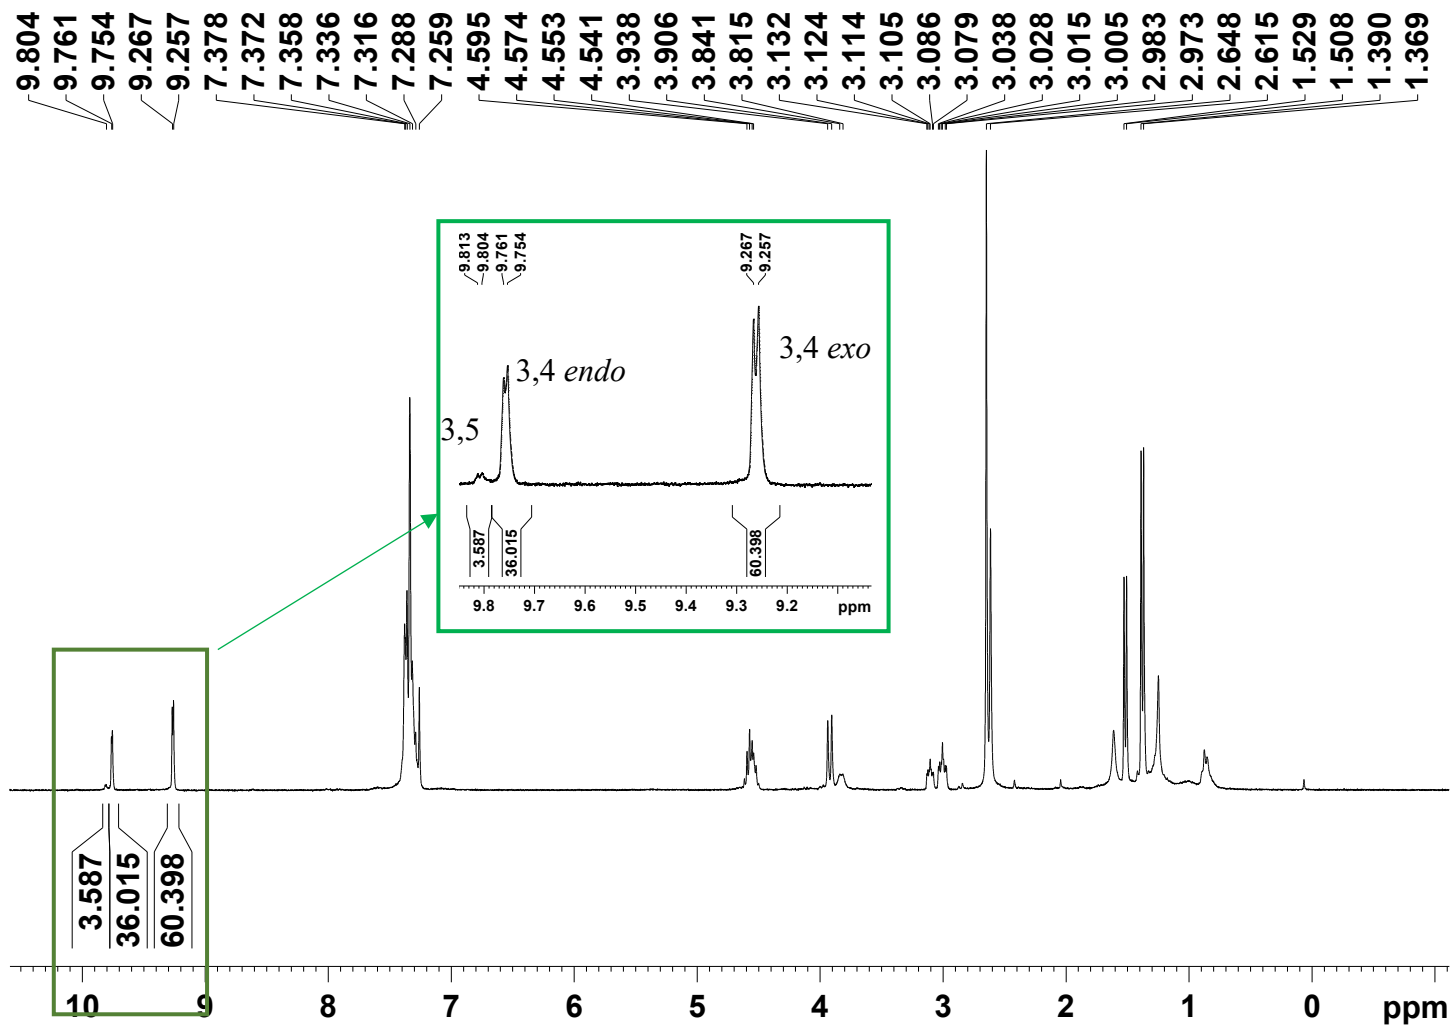

Figure S40. <sup>1</sup>H NMR spectrum (400 MHz, CDCl<sub>3</sub>, 298 K) for entry 2, **Table 1** in the manuscript.

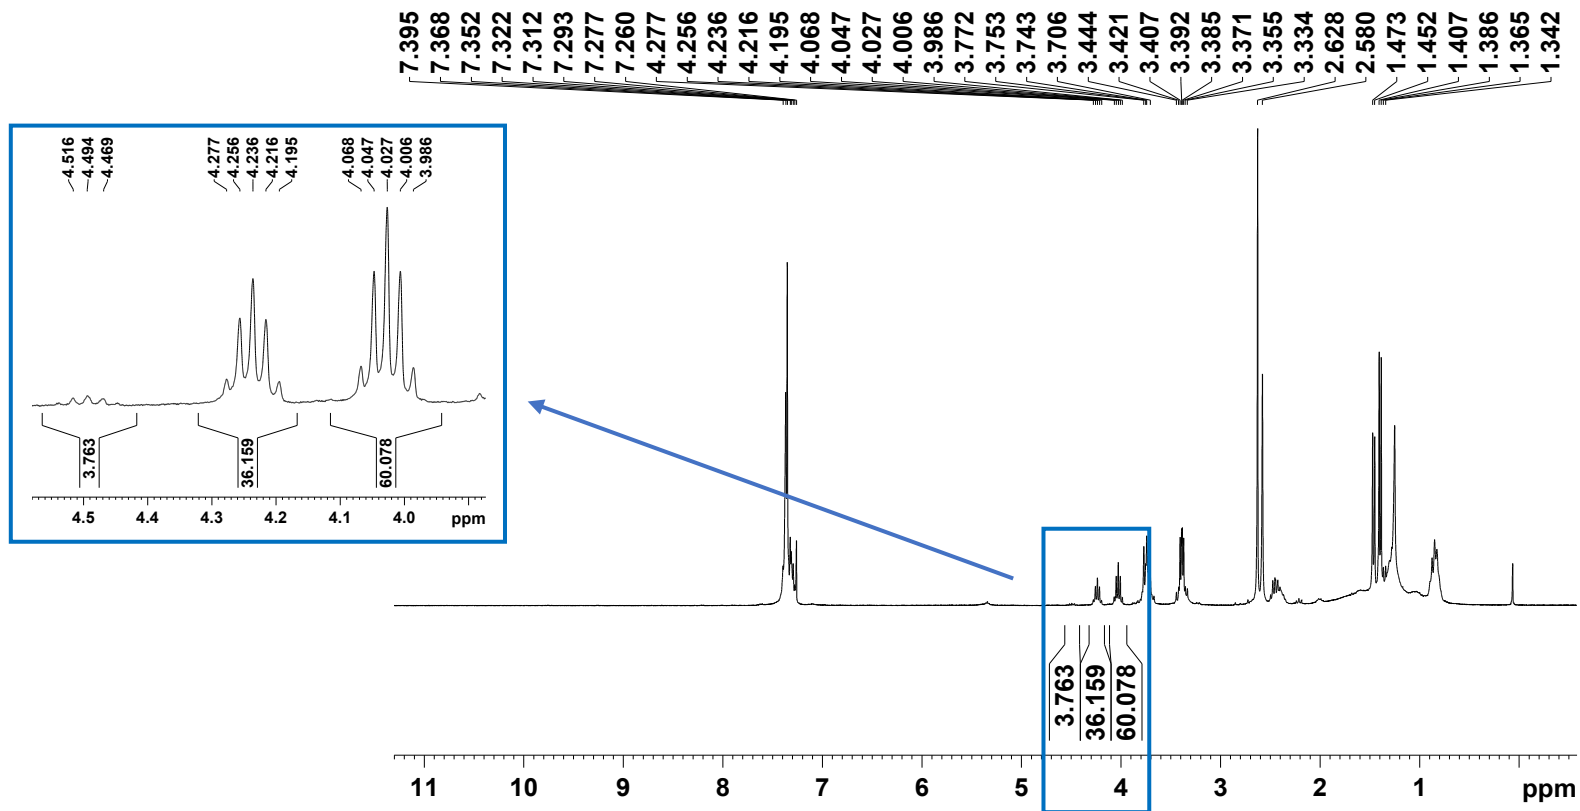

**Figure S41.**  $^1\text{H}$  NMR spectrum (400 MHz,  $\text{CDCl}_3$ , 298 K) of the reduced mixture for entry 2, **Table 1** in the manuscript.

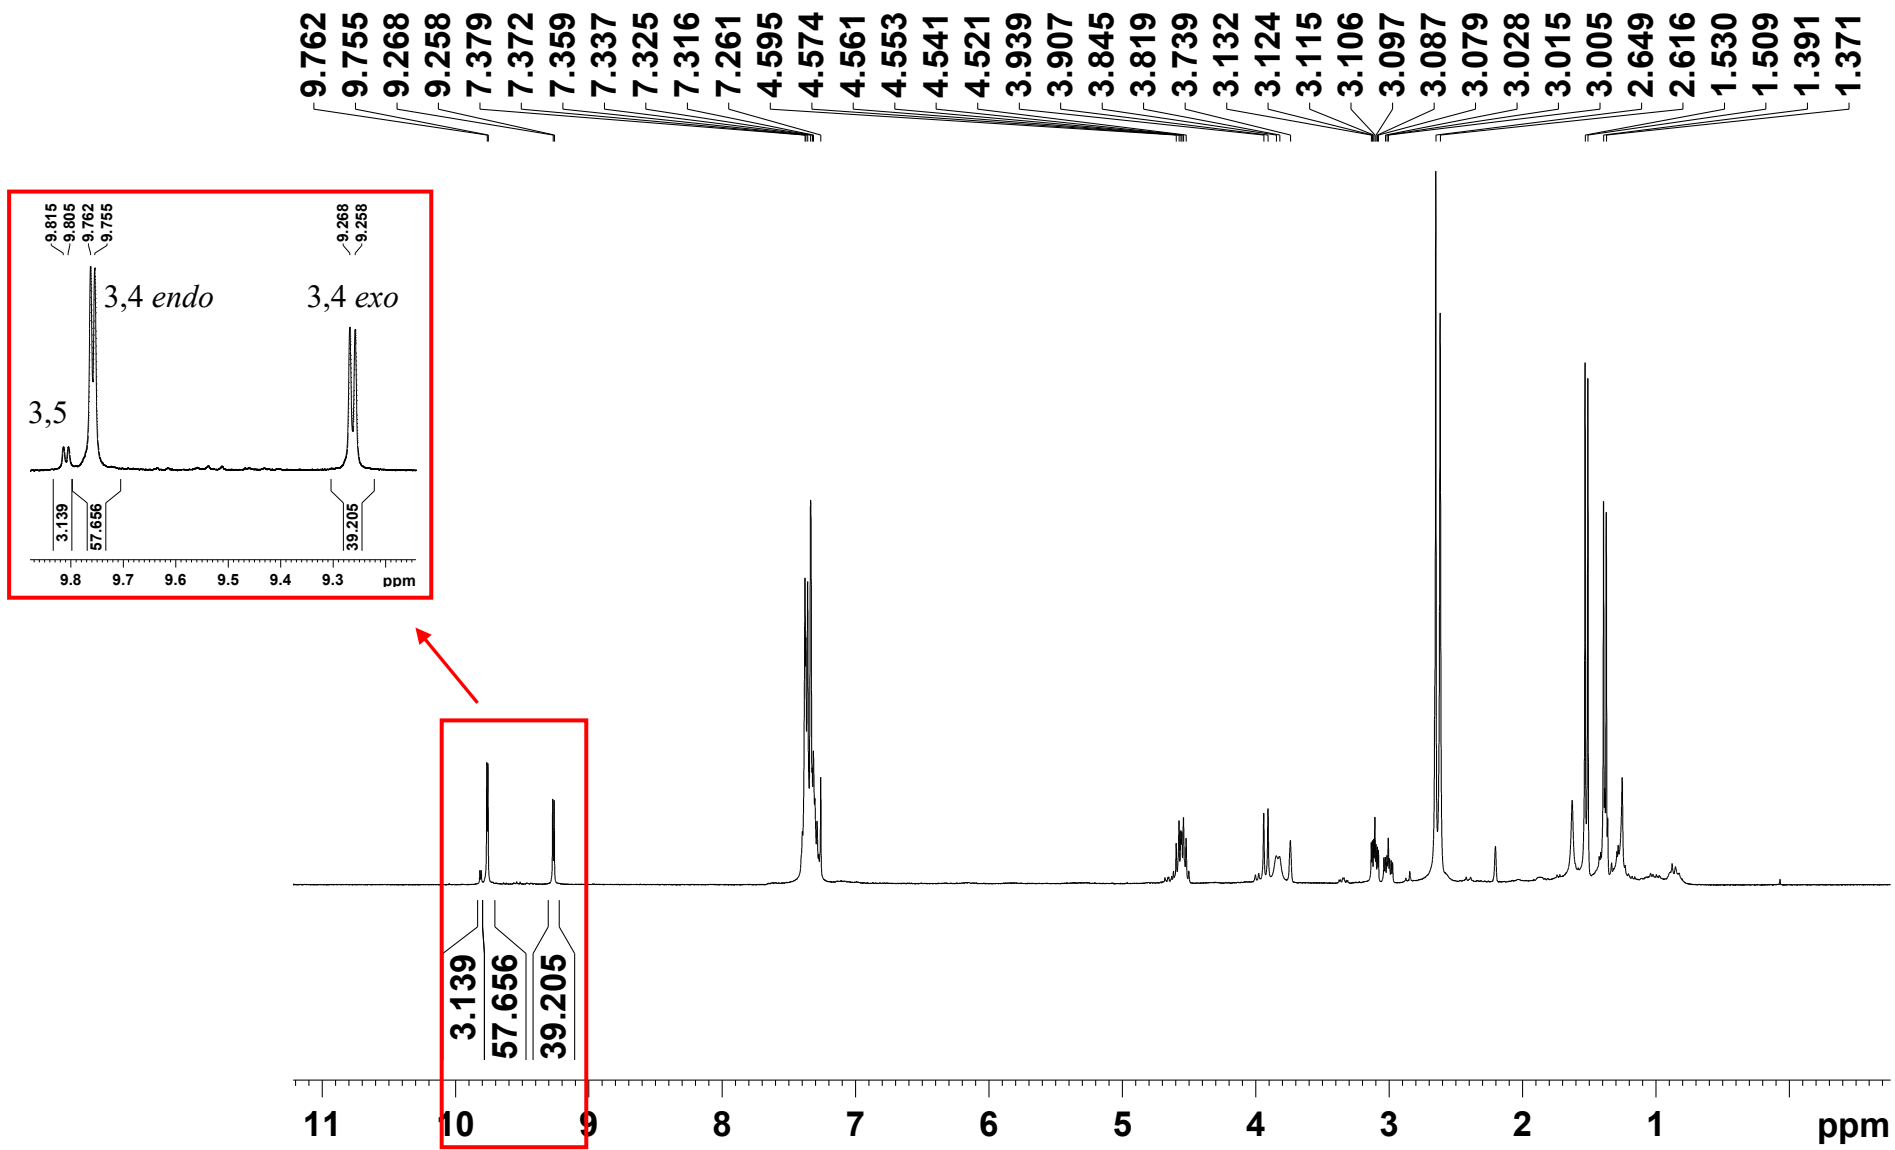

Figure S42. <sup>1</sup>H NMR spectrum (300 MHz, CDCl<sub>3</sub>, 298 K) for entry 4, Table 1 in the manuscript.



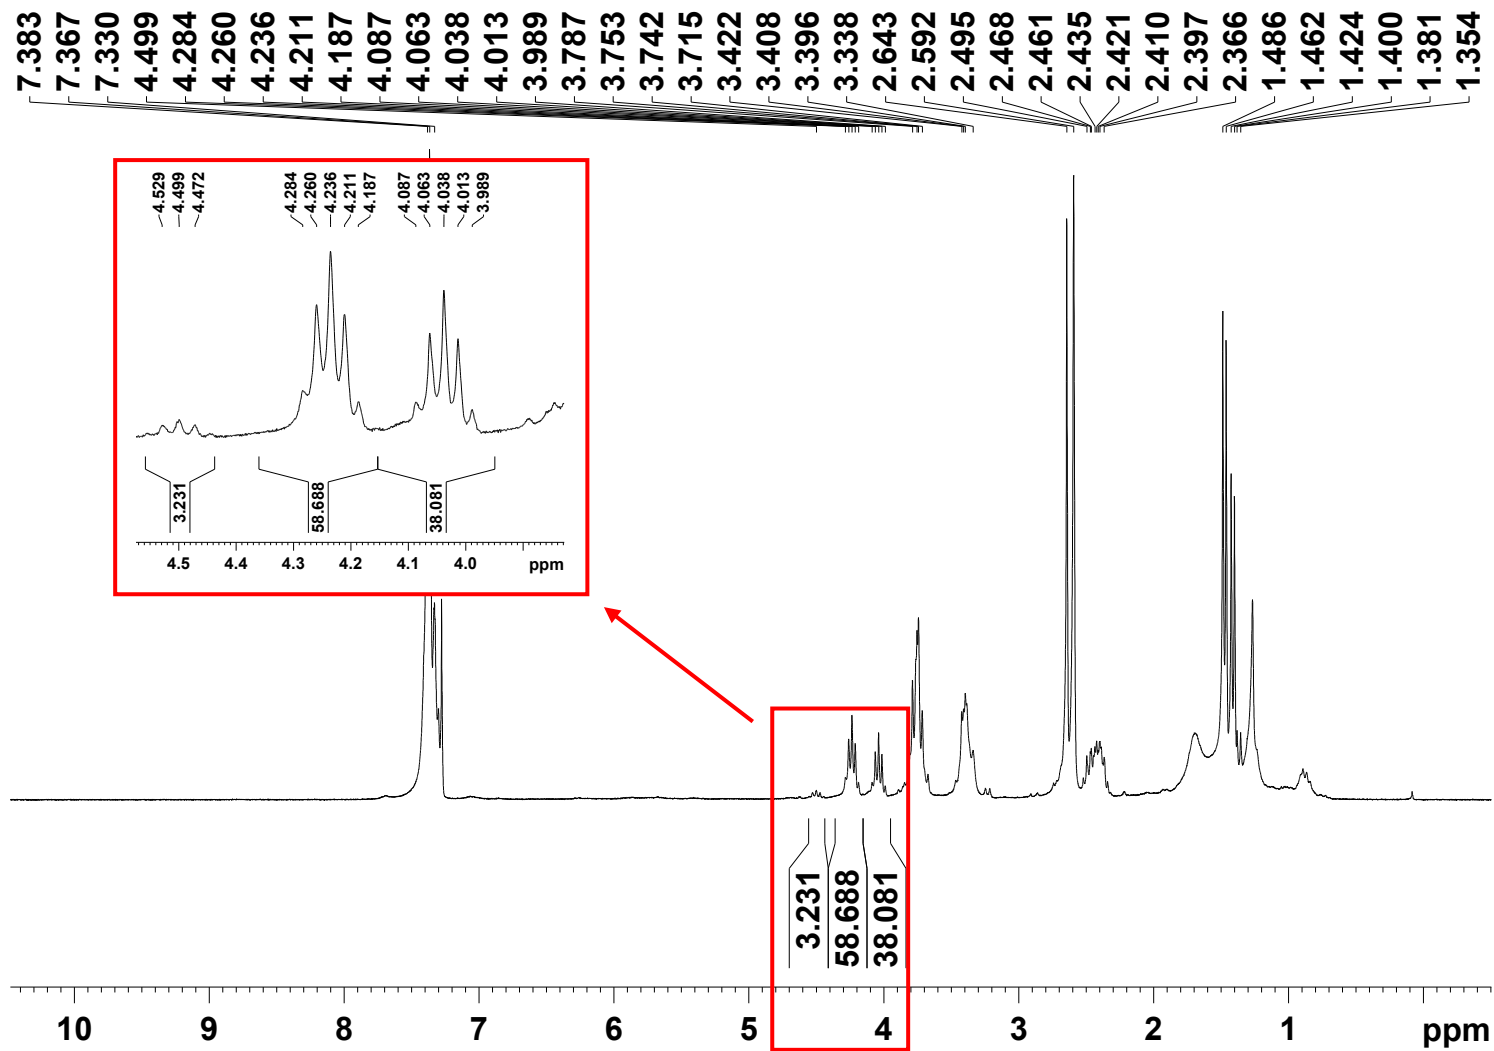

Figure S43.  $^1\text{H}$  NMR spectrum (250 MHz,  $\text{CDCl}_3$ , 298 K) of the reduced mixture for entry 4, **Table 1** in the manuscript.

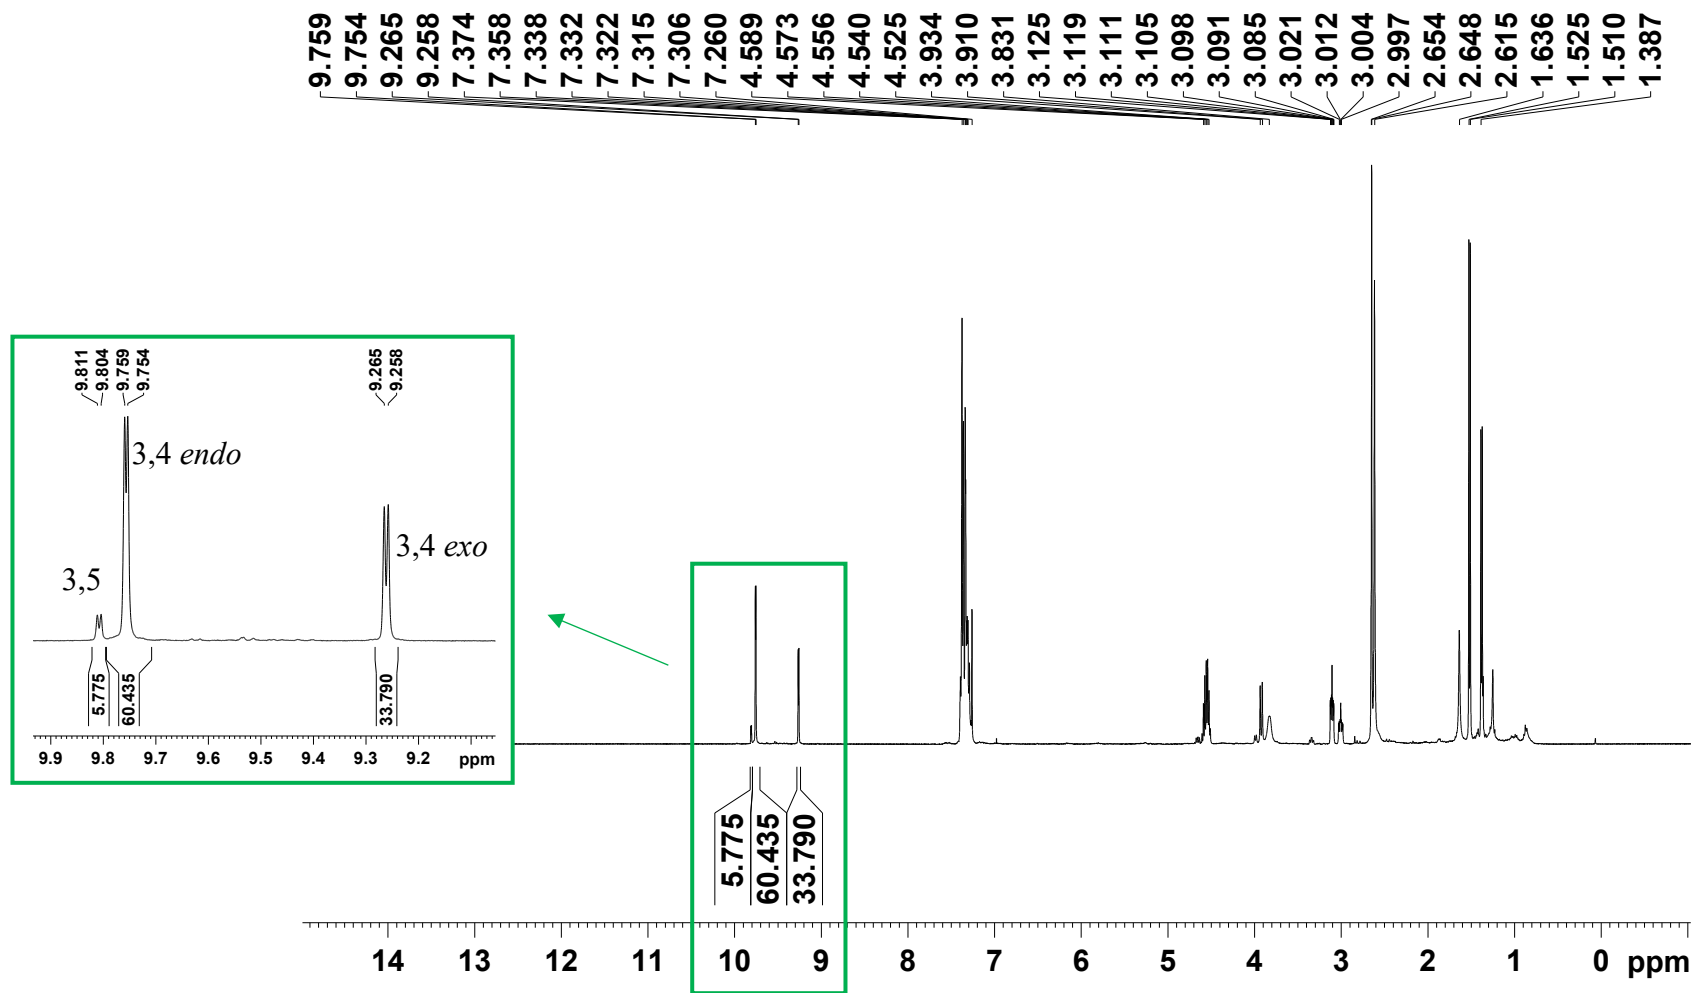

Figure S44. <sup>1</sup>H NMR spectrum (400 MHz, CDCl<sub>3</sub>, 298 K) for entry 5, **Table 1** in the manuscript.

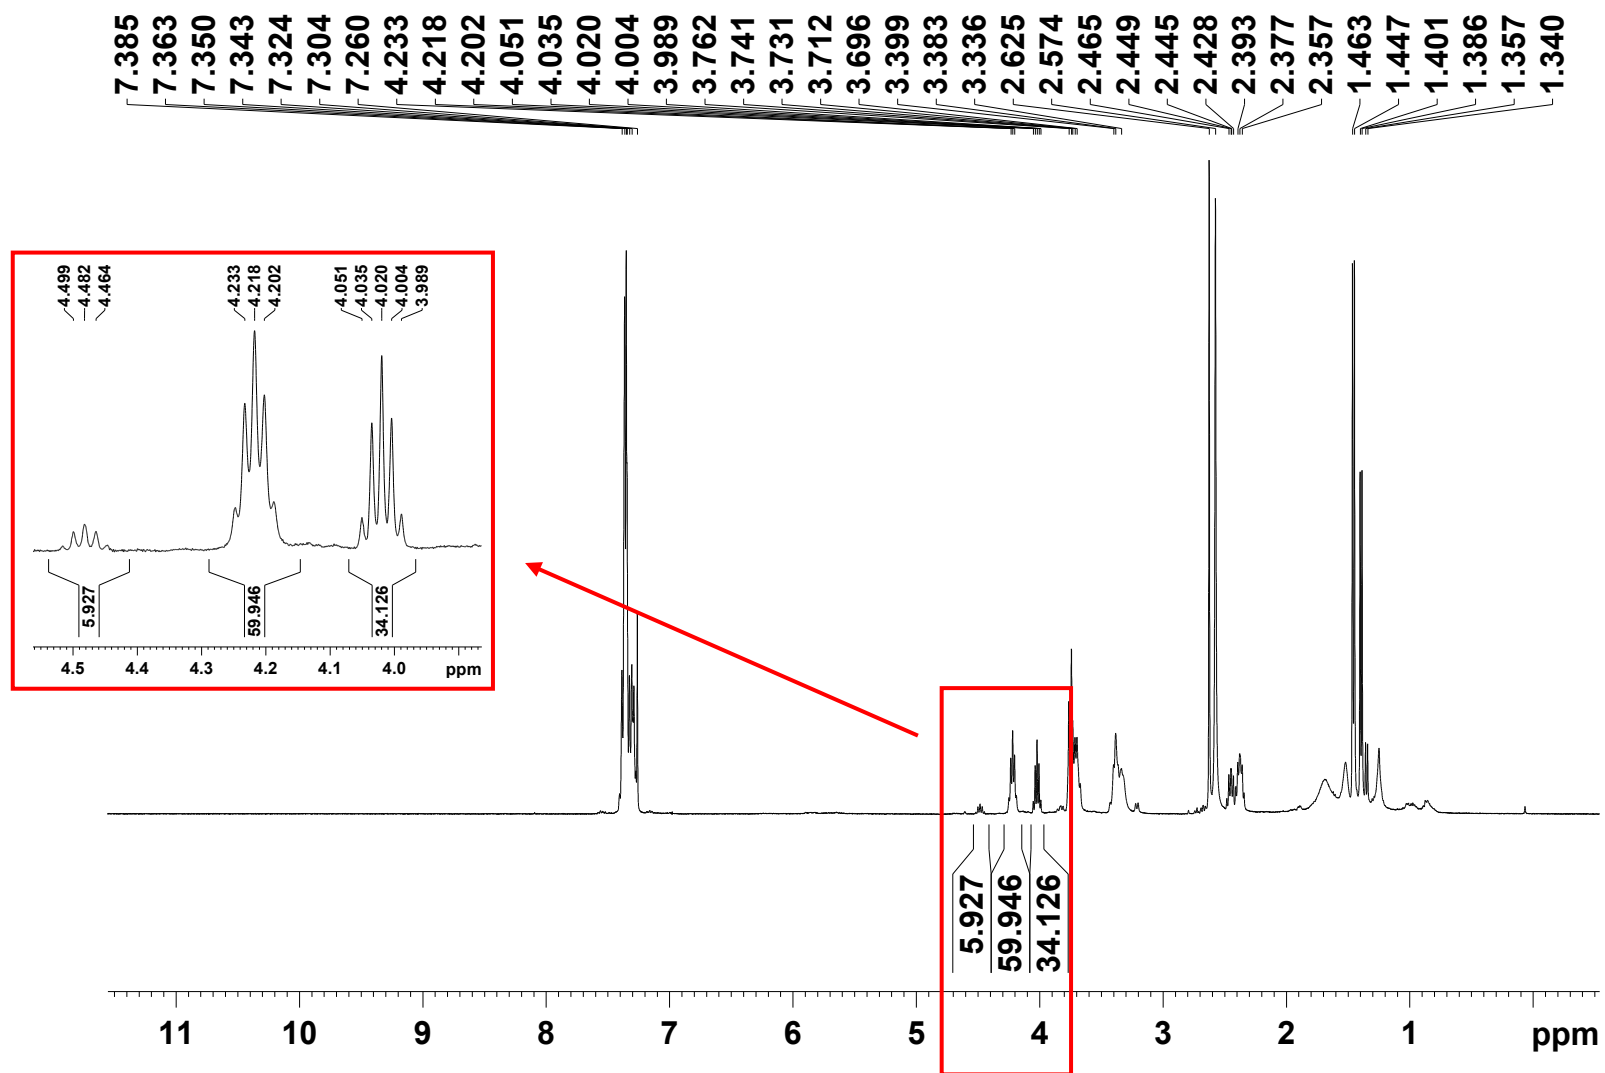

**Figure S45.**  $^1\text{H}$  NMR spectrum (400 MHz,  $\text{CDCl}_3$ , 298 K) of the reduced mixture for entry 5, **Table 1** in the manuscript.

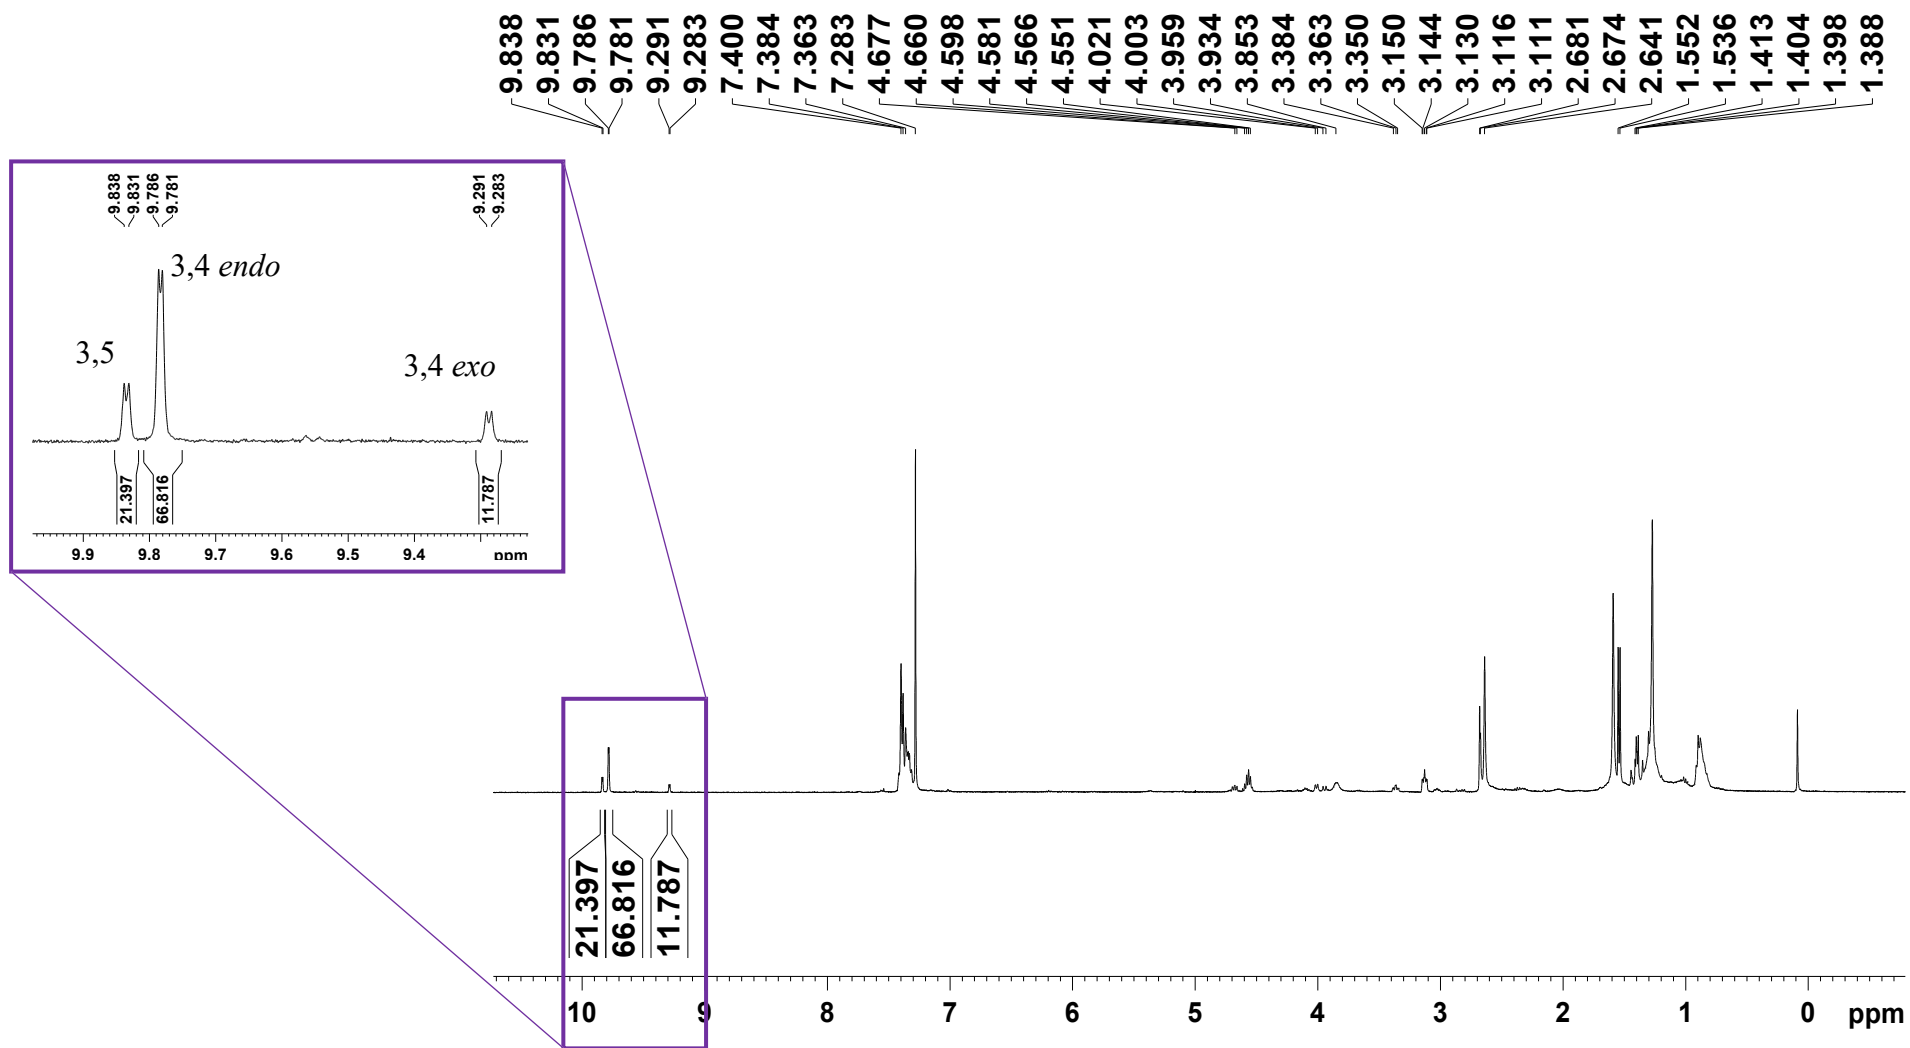

Figure S46. <sup>1</sup>H NMR spectrum (400 MHz, CDCl<sub>3</sub>, 298 K) for entry 6, Table 1 in the manuscript.

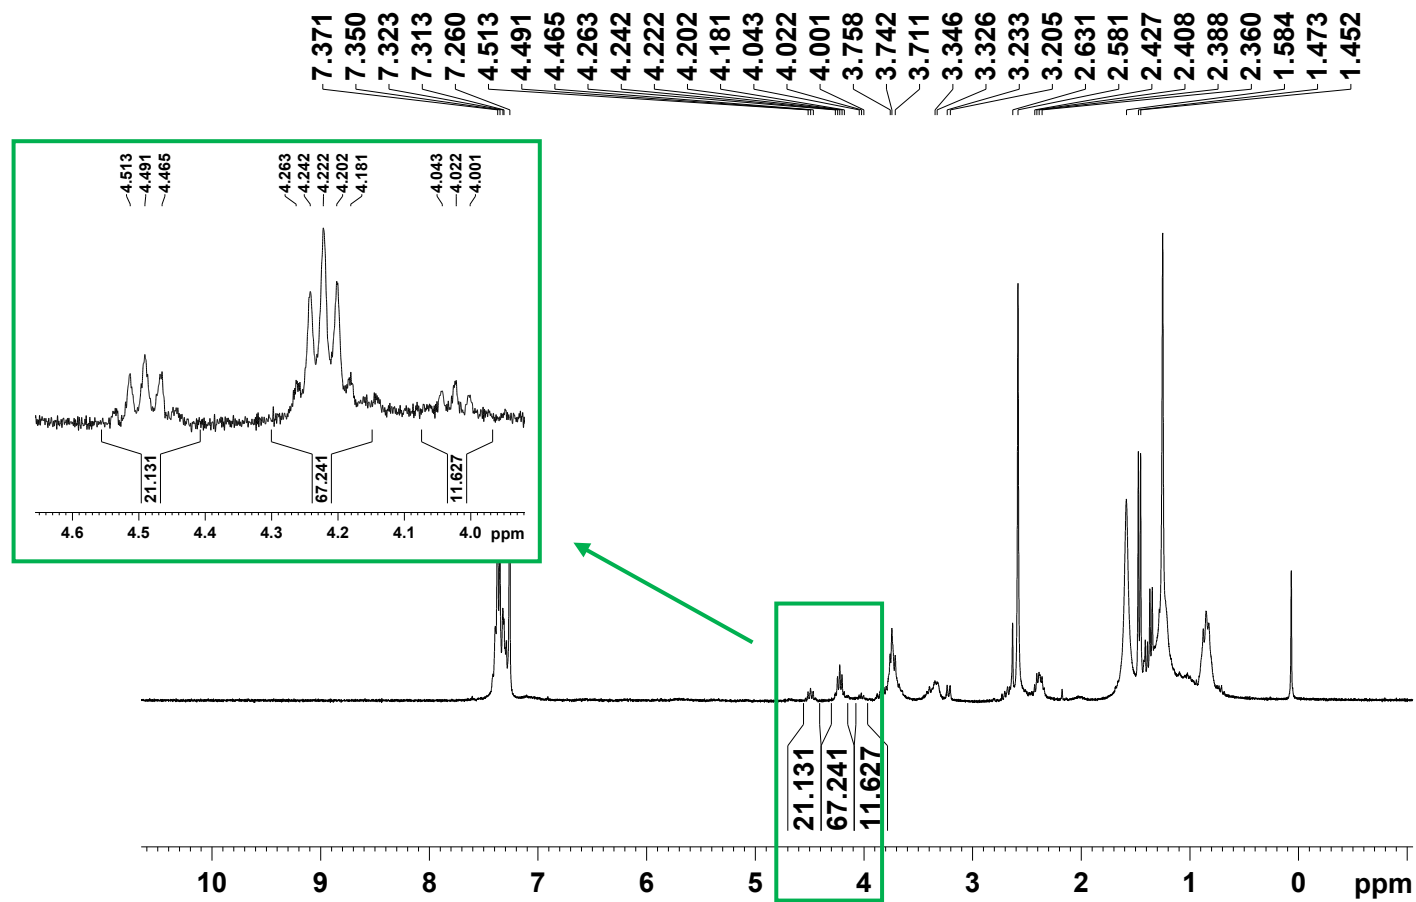

**Figure S47.**  $^1\text{H}$  NMR spectrum (300 MHz,  $\text{CDCl}_3$ , 298 K) of the reduced mixture for entry 6, **Table 1** in the manuscript.

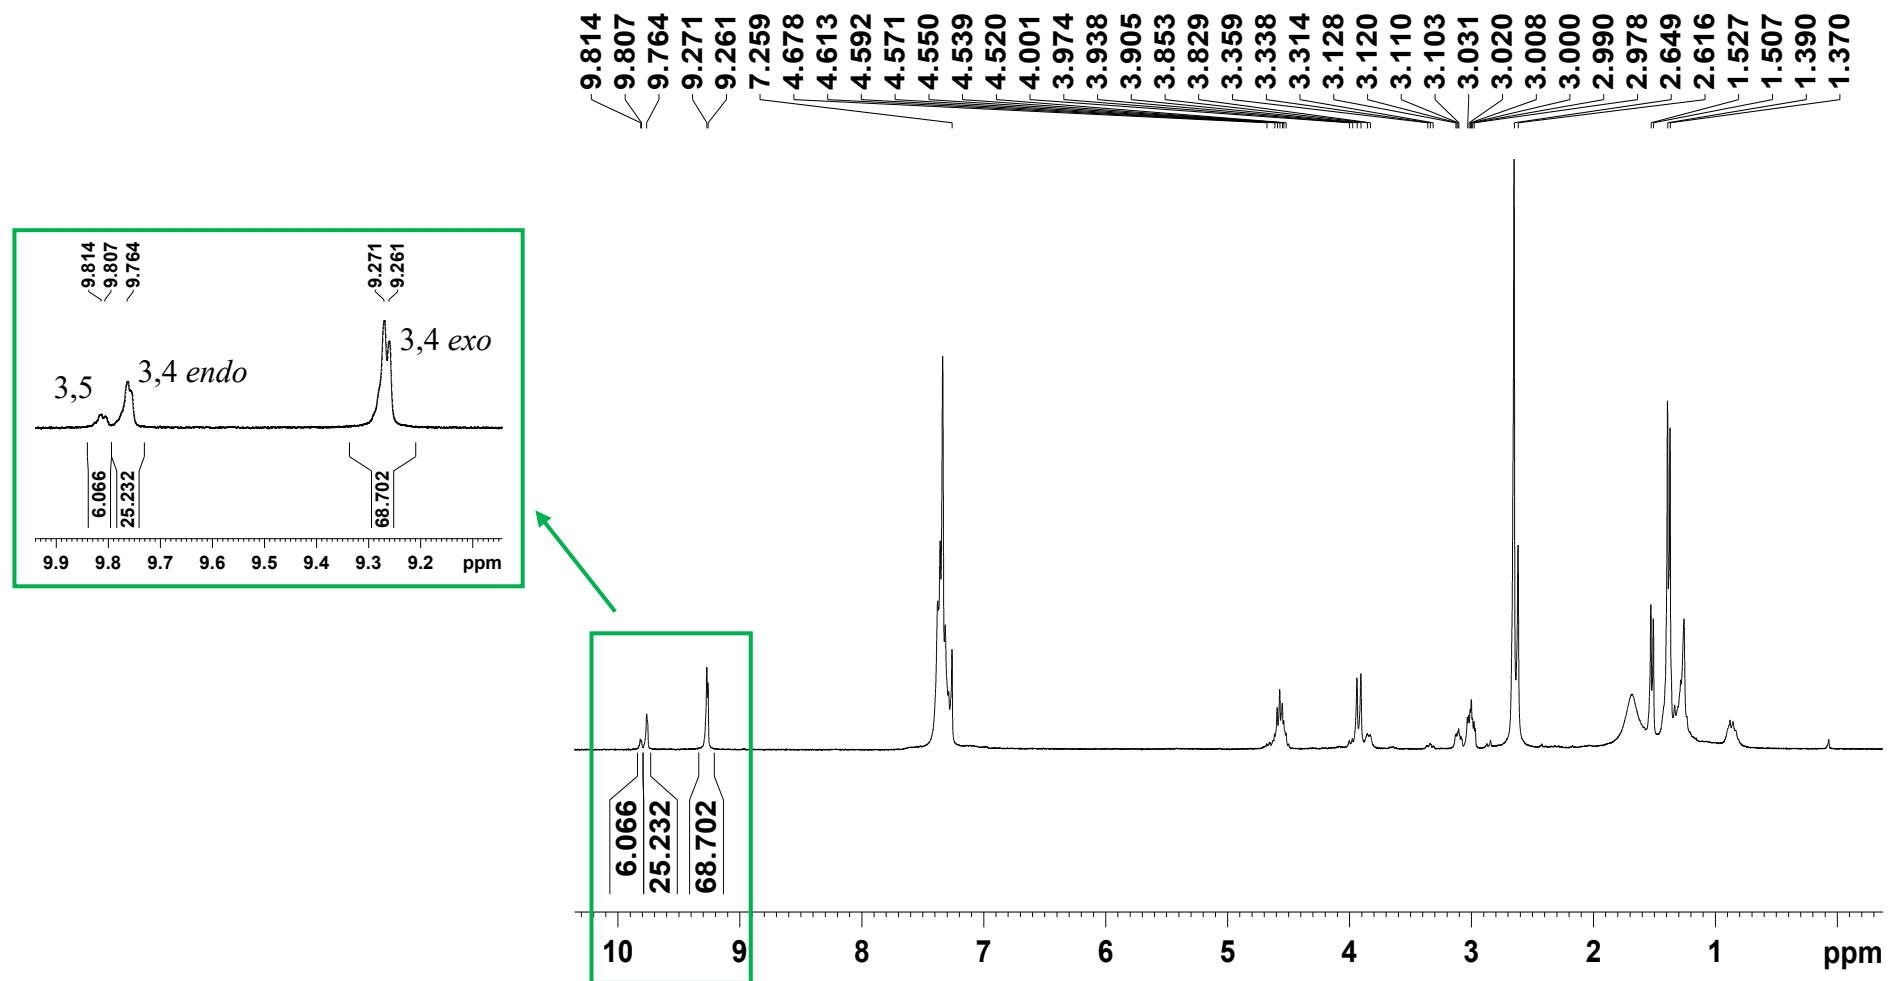

**Figure S48.**  $^1\text{H}$  NMR spectrum (300 MHz,  $\text{CDCl}_3$ , 298 K) for entry 7, **Table 1** in the manuscript.

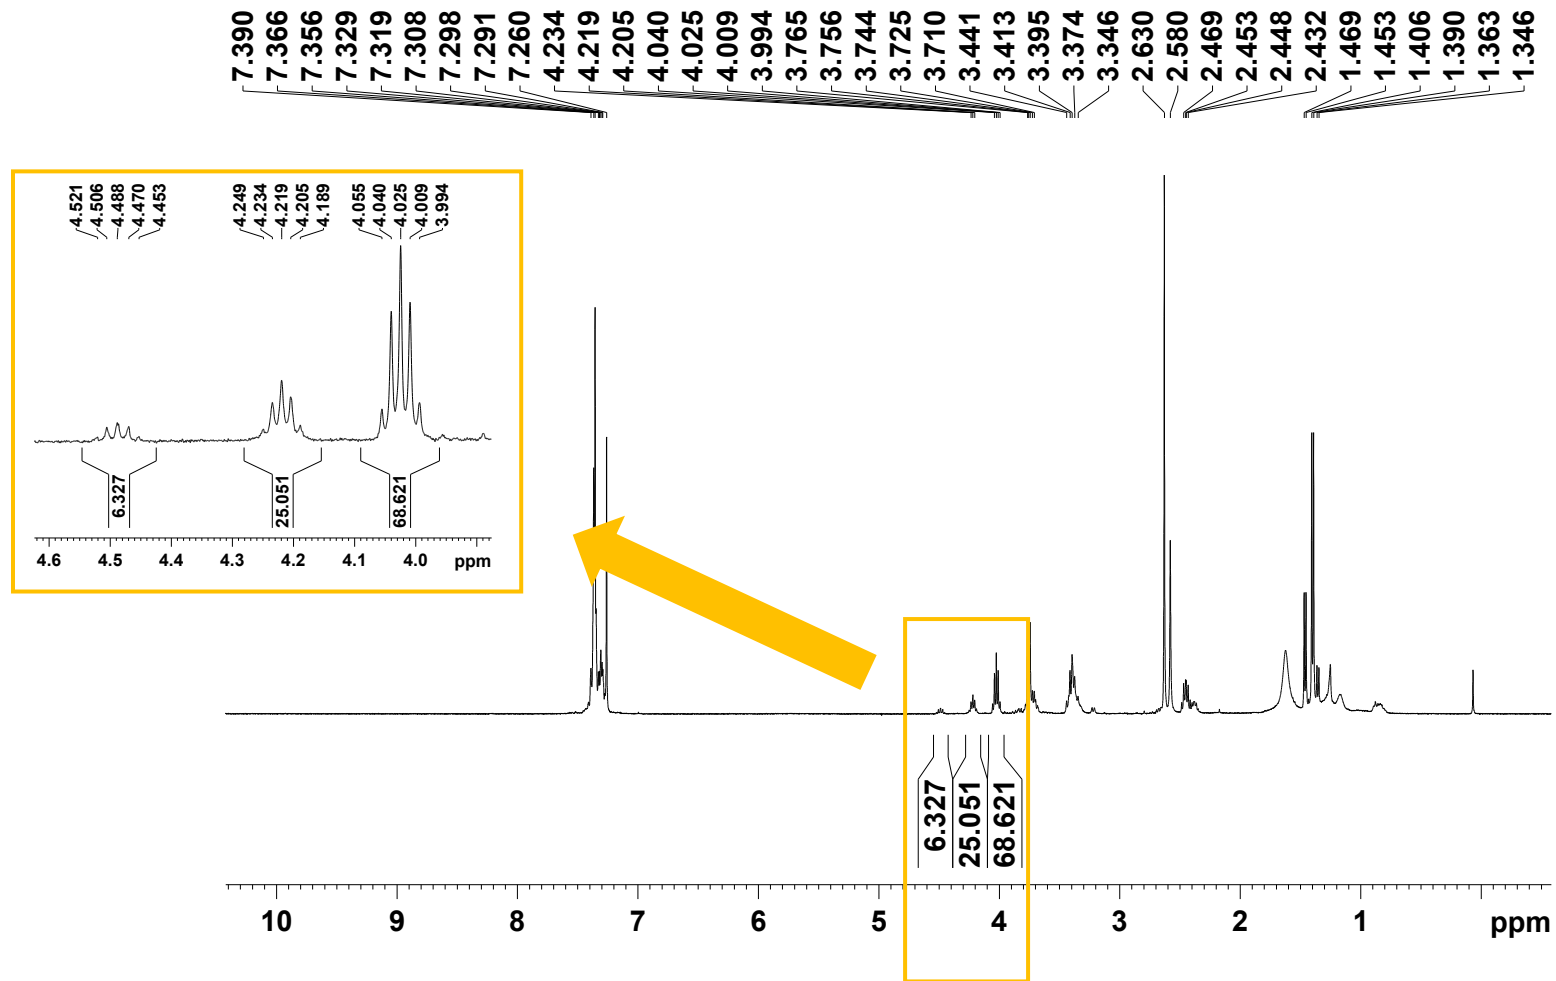

**Figure S49.**  $^1\text{H}$  NMR spectrum (400 MHz,  $\text{CDCl}_3$ , 298 K) for the reduced mixture of entry 7, **Table 1** in the manuscript.

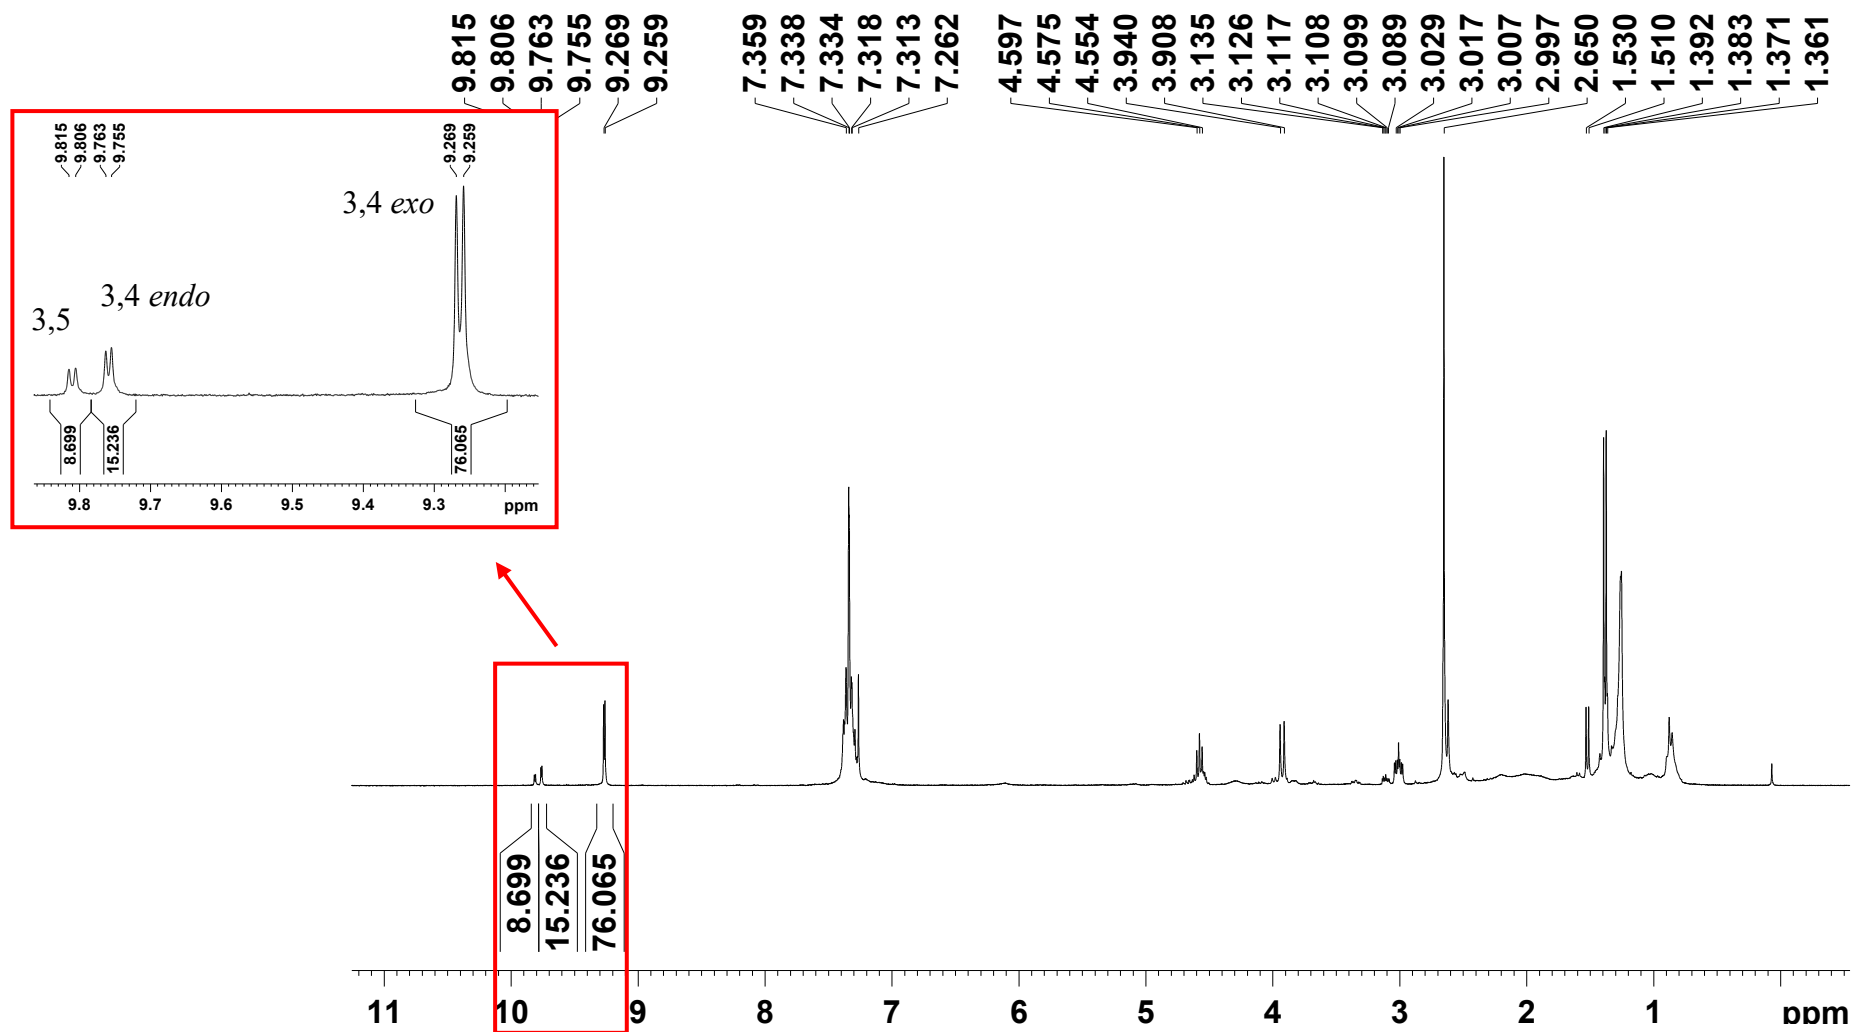

Figure S50.  $^1\text{H}$  NMR spectrum (300 MHz,  $\text{CDCl}_3$ , 298 K) for entry 8, **Table 1** in the manuscript.



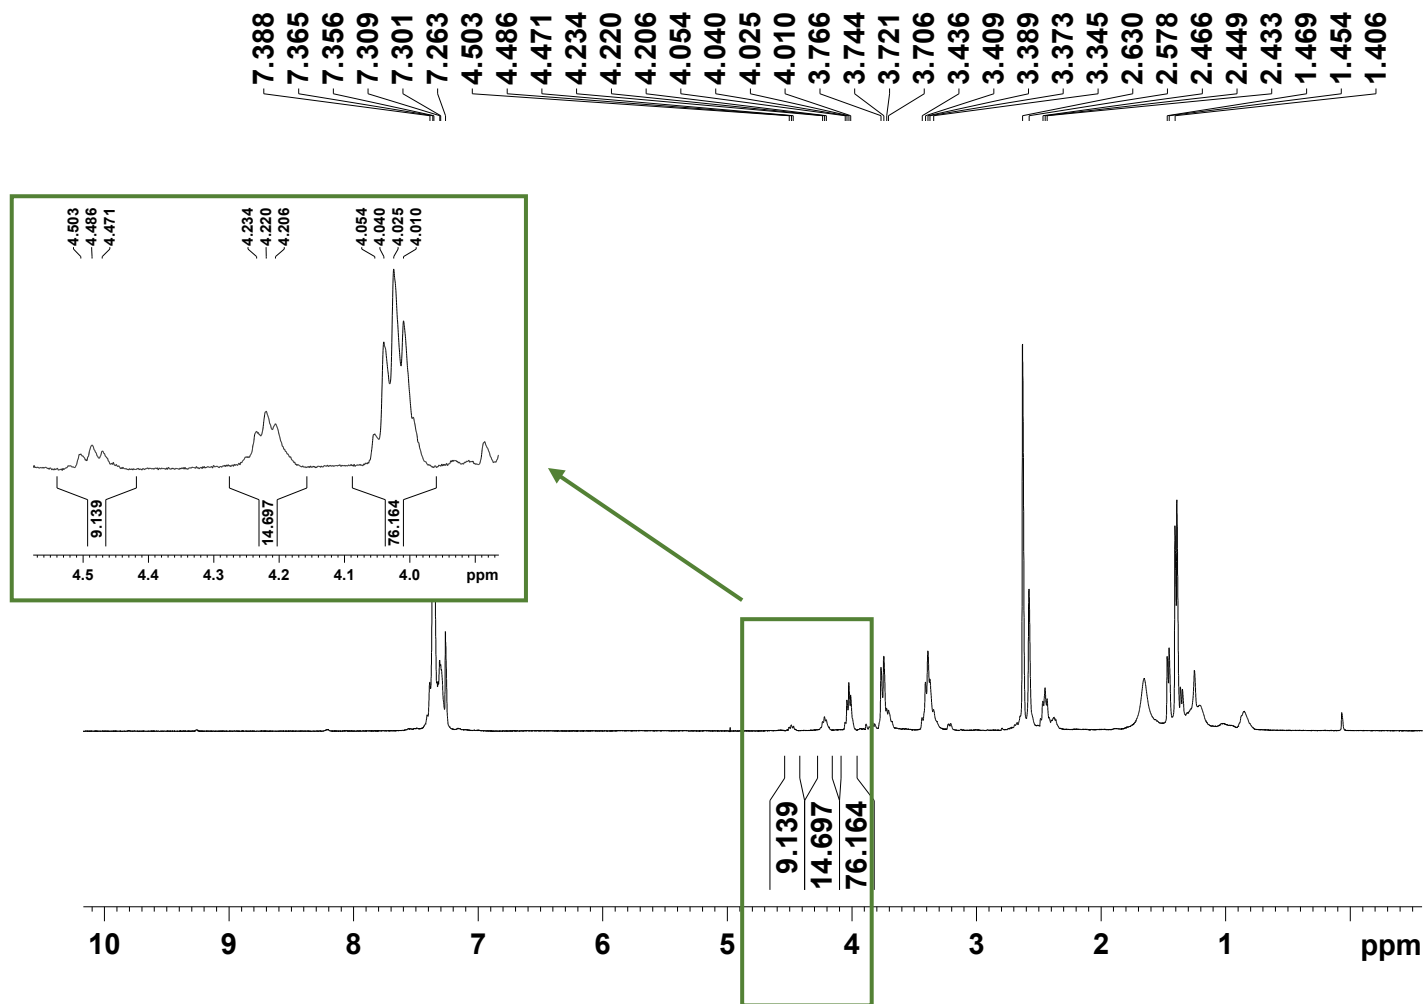

Figure S51.  $^1\text{H}$  NMR spectrum (400 MHz,  $\text{CDCl}_3$ , 298 K) of the reduced mixture for entry 8, **Table 1** in the manuscript.

## 6. HPLC chromatograms

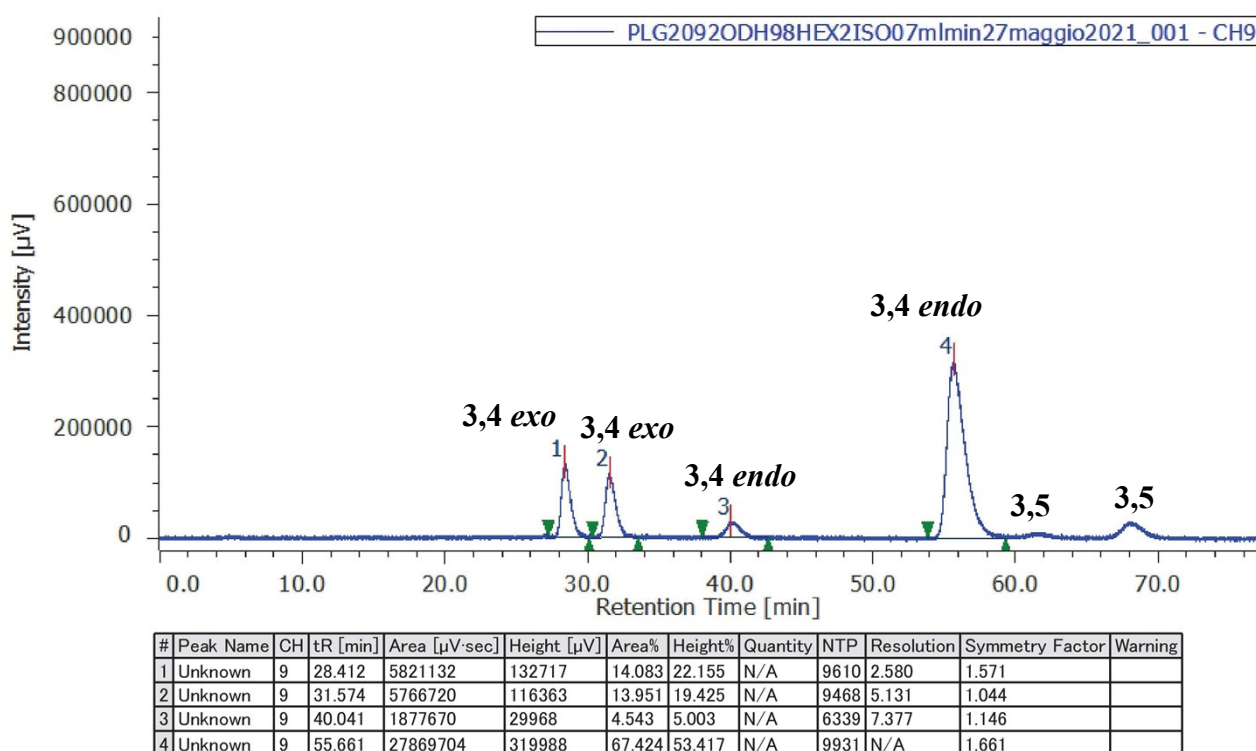

**Figure S52.** HPLC chromatogram for entry 1, Table 1 (in the manuscript) for the 1,3-dipolar cycloaddition between crotonaldehyde **4** and nitrene **3** in the presence of capsule **CR<sub>6</sub>**. The analysis was performed with Chiralcel OD-H as column, 98:2 hexane/isopropanol as eluent phase, 0.7 mL min<sup>-1</sup> at  $\lambda = 214$  nm.

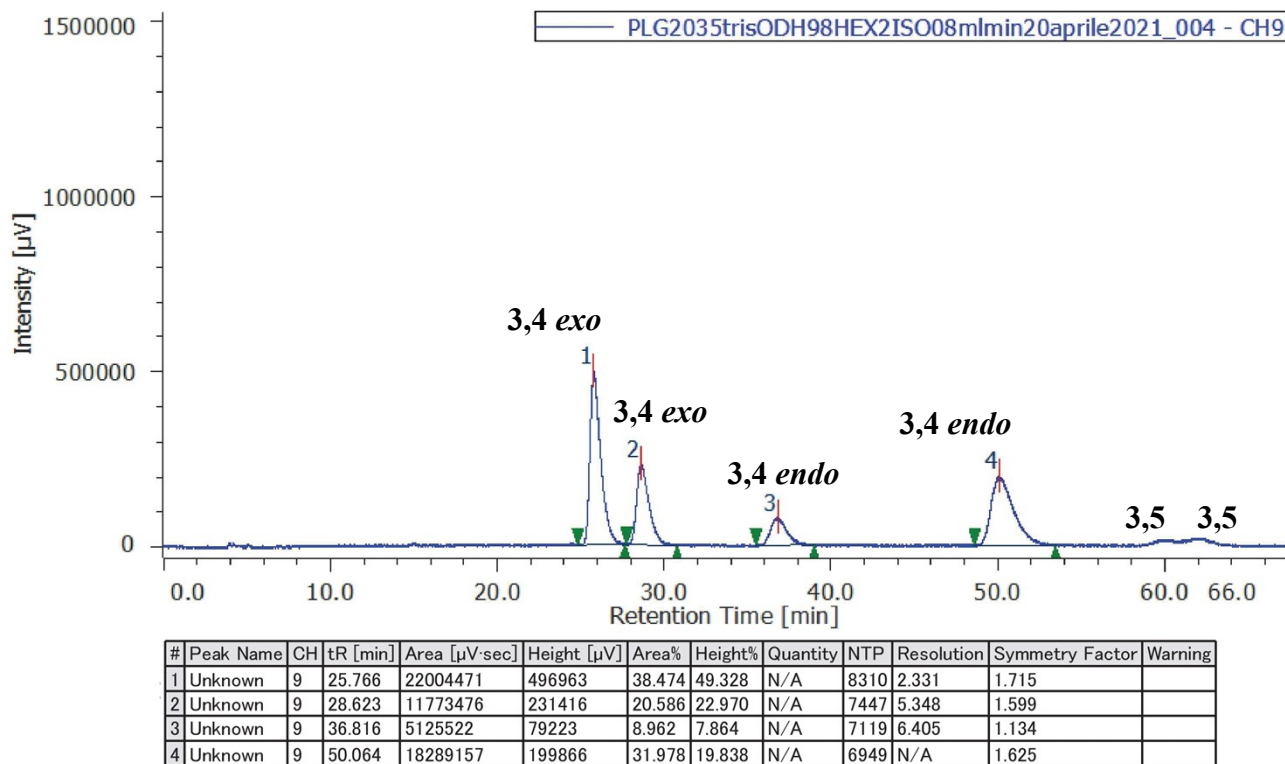

**Figure S53.** HPLC chromatogram for entry 2, Table 1 (in the manuscript) for the 1,3-dipolar cycloaddition between crotonaldehyde **4** and nitrene **3** in the presence of capsule **CP<sub>6</sub>**. The analysis was performed with Chiralcel OD-H as column, 98:2 hexane/isopropanol as eluent phase, 0.7 mL min<sup>-1</sup> at  $\lambda = 214$  nm.

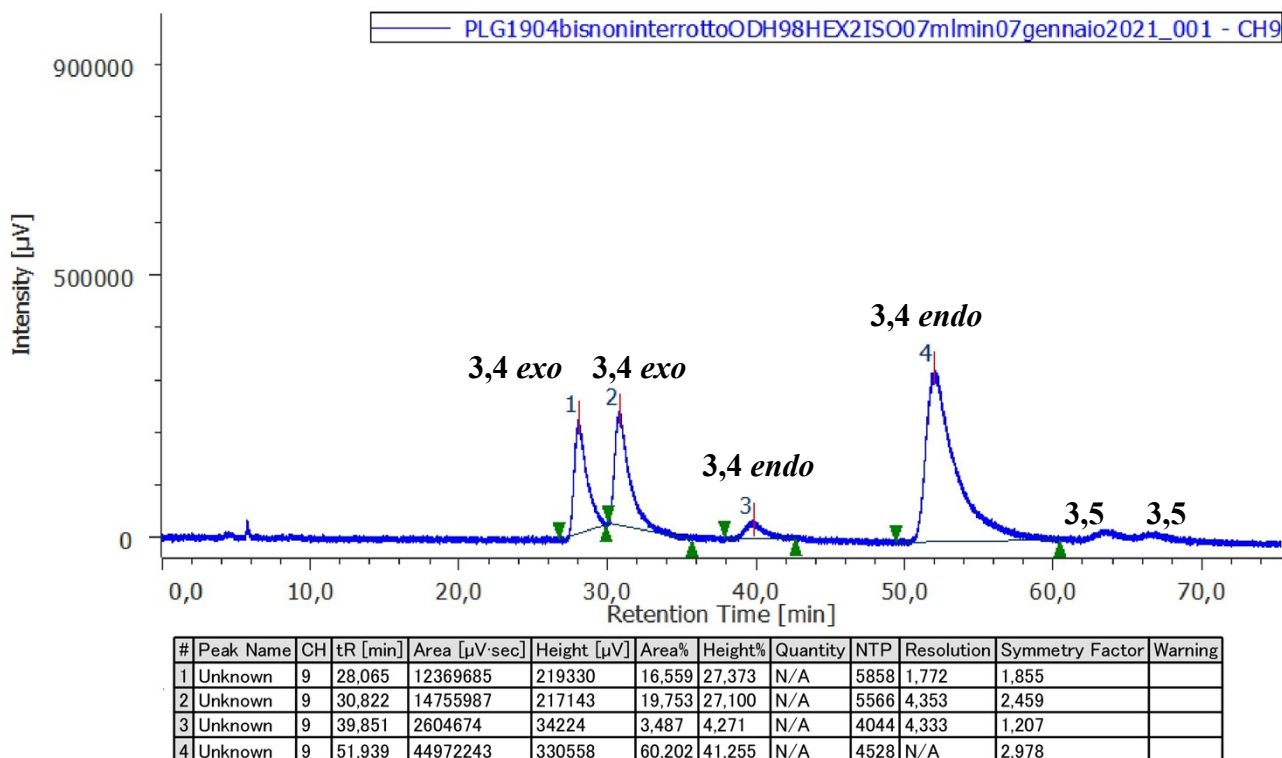

**Figure S54.** HPLC chromatogram for entry 4, Table 1 (in the manuscript) for the 1,3-dipolar cycloaddition between crotonaldehyde **4** and nitrene **3** in the presence of capsule **CP<sub>6</sub>**. The analysis was performed with Chiralcel OD-H as column, 98:2 hexane/isopropanol as eluent phase, 0.7 mL min<sup>-1</sup> at λ = 214 nm.

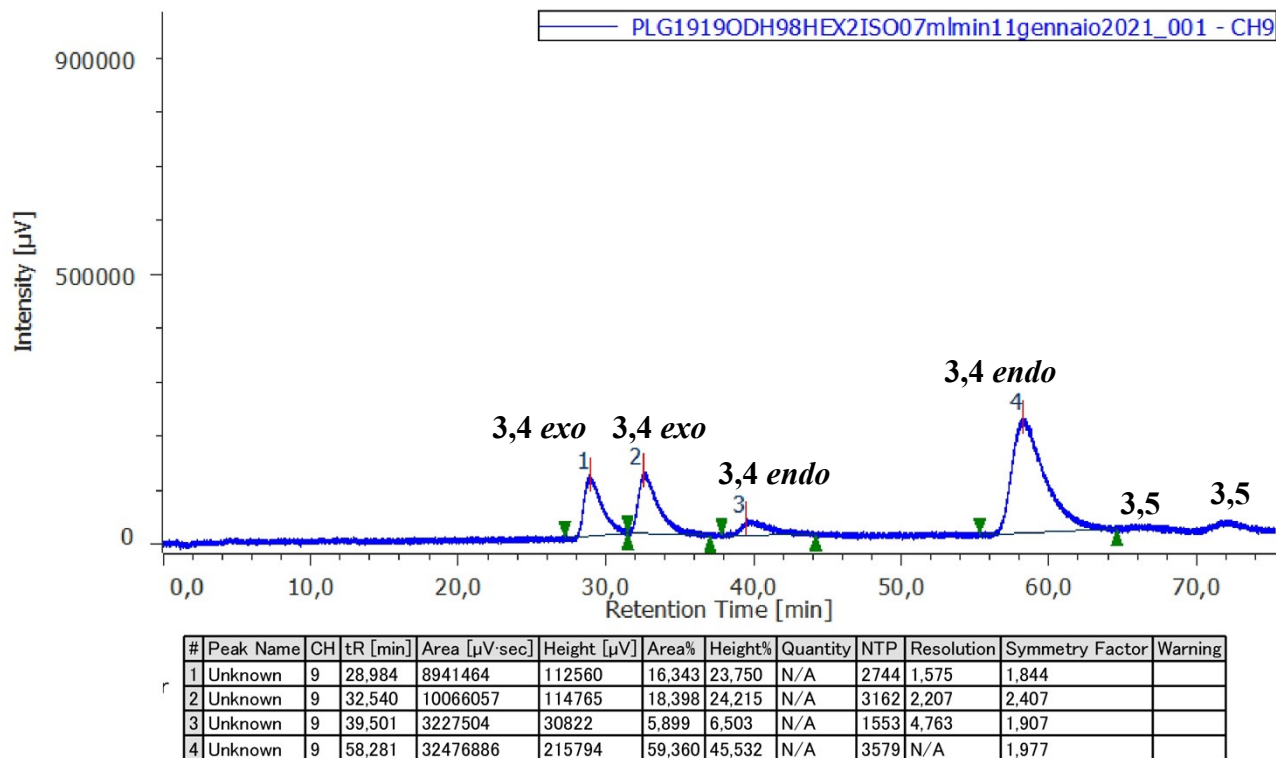

**Figure S55.** HPLC chromatogram for entry 5, Table 1 (in the manuscript) for the 1,3-dipolar cycloaddition between crotonaldehyde **4** and nitrene **3** in the presence of capsule **CP<sub>6</sub>**. The analysis was performed with Chiralcel OD-H as column, 98:2 hexane/isopropanol as eluent phase, 0.7 mL min<sup>-1</sup> at λ = 214 nm.

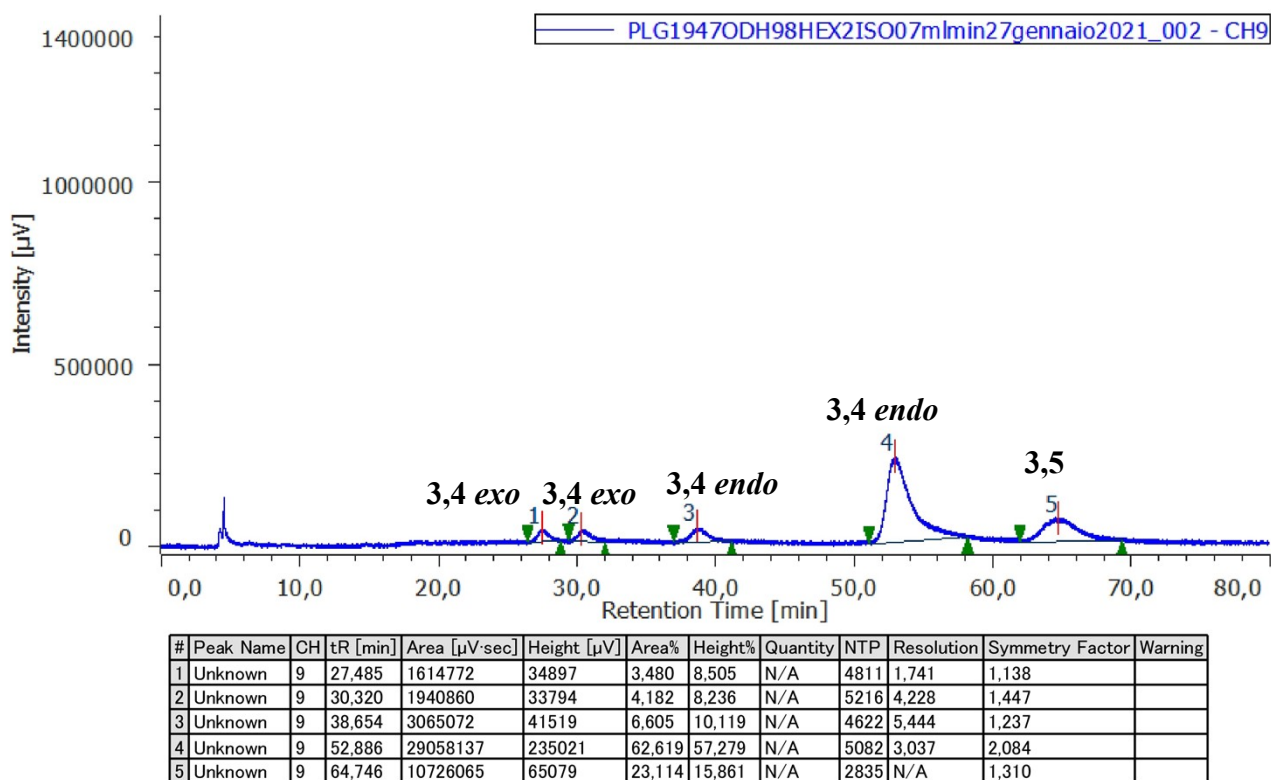

**Figure S56.** HPLC chromatogram for entry 6, Table 1 (in the manuscript) for the 1,3-dipolar cycloaddition between crotonaldehyde **4** and nitrene **3** in the presence of capsule **CP<sub>6</sub>**. The analysis was performed with Chiralcel OD-H as column, 98:2 hexane/isopropanol as eluent phase, 0.7 mL min<sup>-1</sup> at λ = 214 nm.

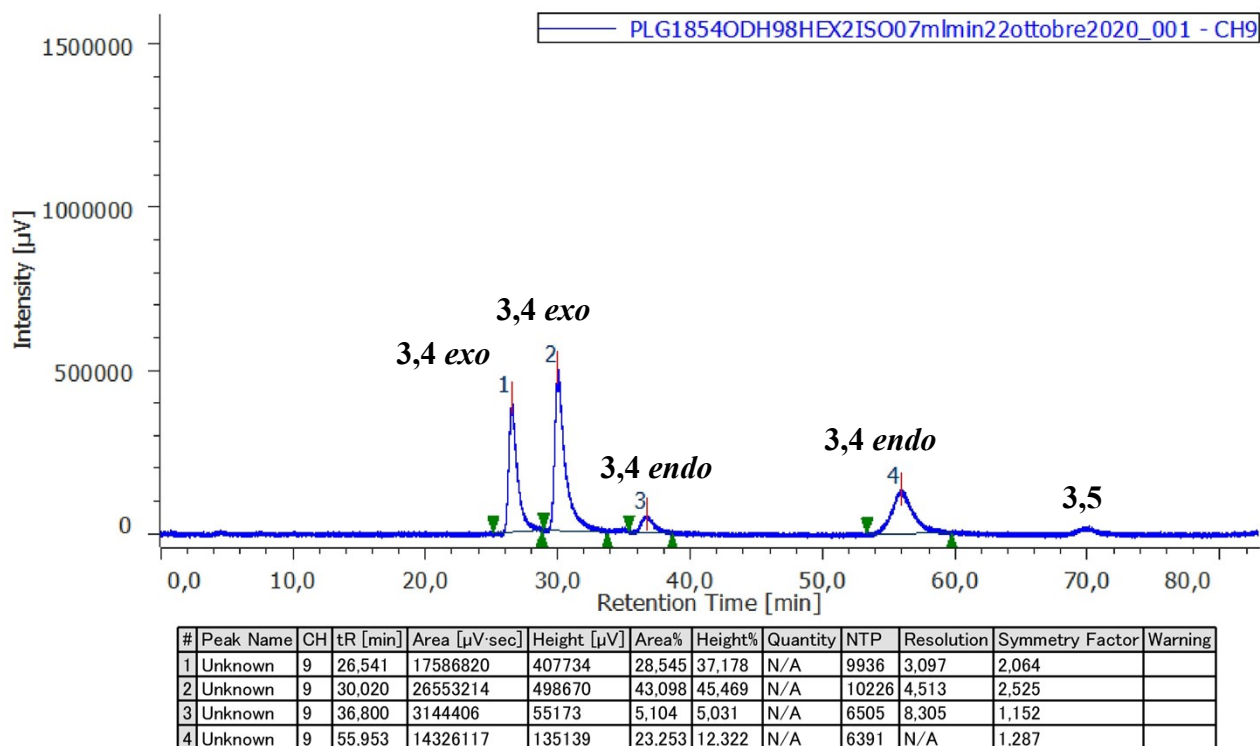

**Figure S57.** HPLC chromatogram for entry 7, Table 1 (in the manuscript) for the 1,3-dipolar cycloaddition between crotonaldehyde **4** and nitrene **3** in the presence of capsule **CP<sub>6</sub>**. The analysis was performed with Chiralcel OD-H as column, 98:2 hexane/isopropanol as eluent phase, 0.7 mL min<sup>-1</sup> at λ = 214 nm.

---

## 7. Computational Studies

### 7.1. Quantum mechanical, ONIOM, and molecular dynamics calculations

Due to the high computational cost derived from the large number of atoms involved, we choose to conduct an *in-silico* investigation using the ONIOM method on a reduced model of **CP<sub>6</sub>**, namely **CP<sub>6R</sub>** substituting the undecyl residues (the so-called “feet”) present in the hexameric capsule with the methyl ones. To deal with the multiple relevant minima due to the flexibility of the capsule and complexes we first conducted, on all compound@**CP<sub>6R</sub>** complexes, a preliminary molecular dynamics (MD) study (10 ns) in benzene, as explicit solvent, at 298 K utilizing the GAFF2 force field, and then full minimization of the structures saved every 100 ps of MD simulation has been performed at the GFN2-xTB level of theory, with the benzene as implicit solvent, to locate the structure with the plausible lowest minima. The so located most stable complex has been submitted to a conformational search using CREST combined to the xTB at the GFN-FF level of theory. CREST employ an iterative conformational search workflow that generates conformer/rotamer ensembles by extensive metadynamic sampling, with an additional genetic z-matrix crossing step at the end. The final ensemble file, containing the most stable generated conformers, has been processed with the *screen* option to optimize each point on the ensemble file with GFN2-xTB (benzene as implicit solvent), and sort the resulting ensemble. The most stable structure has been utilized as starting point for the QM/SE calculations. The MD calculations have been performed with the YASARA Structure software, the semiempirical extended tight binding with the xTB program,<sup>6</sup> the conformational search with the CREST program,<sup>7</sup> and the DFT and ONIOM ones with the Gaussian 16 suite of programs.<sup>8</sup> For the MD calculations, a periodic simulation cell with boundaries extending 10 Å from the surface of the capsule was employed. The box was filled with chloroform, with a maximum sum of all bumps benzene of 1.0 Å, and a density of 0.874 g mL<sup>-1</sup> with explicit solvent. The final system dimensions were approximately 43 × 43 × 43 Å<sup>3</sup>. The force field parameters were generated with the AutoSMILES utility, which employs semiempirical AM1 geometry optimization and assignment of charges, followed by the assignment of the AM1BCC atom and bond types with refinement using the RESP charges, and finally the assignments of general AMBER force field atom types. Optimization of the hydrogen bond network was obtained using the method established by Hooft et al. A short MD was run on the solvent only. The entire system was then energy minimized using first a steepest descent

---

<sup>6</sup> C. Bannwarth, E. Caldeweyher, S. Ehlert, A. Hansen, P. Pracht, J. Seibert, *et al.* *WIREs Computational Molecular Science* **n/a**, e01493.

<sup>7</sup> P. Pracht, F. Bohle, S. Grimme, *Physical Chemistry Chemical Physics* **2020**, *22*, 7169–7192.

<sup>8</sup> M. J. Frisch, G. W. Trucks, H. B. Schlegel, G. E. Scuseria, M. A. Robb, J. R. Cheeseman, G. Scalmani, V. Barone, B. Mennucci, G. A. Petersson, H. Nakatsuji, M. Caricato, X. Li, H. P. Hratchian, A. F. Izmaylov, J. Bloino, G. Zheng, J. L. Sonnenberg, M. Hada, M. Ehara, K. Toyota, R. Fukuda, J. Hasegawa, M. Ishida, T. Nakajima, Y. Honda, O. Kitao, H. Nakai, T. Vreven, J. A. Montgomery, J. E. Peralta, F. Ogliaro, M. Bearpark, J. J. Heyd, E. Brothers, K. N. Kudin, V. N. Staroverov, R. Kobayashi, J. Normand, K. Raghavachari, A. Rendell, J. C. Burant, S. S. Iyengar, J. Tomasi, M. Cossi, N. Rega, J. M. Millam, M. Klene, J. E. Knox, J. B. Cross, V. Bakken, C. Adamo, J. Jaramillo, R. Gomperts, R. E. Stratmann, O. Yazyev, A. J. Austin, R. Cammi, C. Pomelli, J. W. Ochterski, R. L. Martin, K. Morokuma, V. G. Zakrzewski, G. A. Voth, P. Salvador, J. J. Dannenberg, S. Dapprich, A. D. Daniels, Farkas, J. B. Foresman, J. V. Ortiz, J. Cioslowski, D. J. Fox, Gaussian 16 revision C.01.

minimization to remove conformational stress, followed by a simulated annealing minimization until convergence ( $<0.01$  kcal/mol Å). The MD simulation was then initiated, using the NPT ensemble at 298 K, and integration time steps for intramolecular and intermolecular forces every 1.25 fs and 2.5 fs, respectively. Finally, 10 ns MD simulations without any restrictions were conducted, and the conformations of each system were recorded every 100 ps. For the QM/SE calculations, the reactive species together with the two resorcinol hydroxyl groups with which the carboxylate moiety of **1** establishes the hydrogen bonds were modeled using the M06-2X DFT functional, employing the Def2SVP basis set, while the semiempirical method PM6 was employed for all the other atoms. All pure DFT calculations were performed at M06-2X/Def2SVP level. In order to determine the activation energy barrier of each step and the reaction energy profile, reactant complex, transition state and product complex structures were fully optimized. All transition structures were characterized by only one imaginary frequency in normal mode analysis and further supported by Intrinsic Reaction Coordinate (IRC) calculations. Other stationary points (reactant complex, intermediates, and product complex) were characterized by all real frequencies and by IRC calculations. Thermodynamic corrections were calculated at 298.15 K and 1 atm for the optimized geometries. All the relative energies presented in the manuscript are referred to the sum of electronic and thermal free energies calculated at the ONIOM[M06-2X/Def2SVP:PM6] level (zero-point energy-corrected ONIOM values). The optimizations were carried out using the Bery analytical gradient optimization method.

**Table S3.** Gibbs free energies ( $G$ , in Hartree), number of negative frequencies, relative Gibbs free energies ( $\Delta G$ ,<sup>a</sup> in kcal/mol), and activation free energies ( $\Delta G^\ddagger$ ,<sup>b</sup> in kcal/mol) of all investigated structures.

| Structure                       | $G$          | Neg. Freq. | $\Delta G$ | $\Delta G^\ddagger$ |
|---------------------------------|--------------|------------|------------|---------------------|
| <b>3</b>                        | -439.529503  | 0          | —          | —                   |
| <b>I</b>                        | -555.107284  | 0          | —          | —                   |
| <b>CP<sub>6R</sub></b>          | -154.061100  | 0          | —          | —                   |
| <b>I@CP<sub>6R-in</sub></b>     | -709.212695  | 0          | -27.81     | —                   |
| <b>I@CP<sub>6R-out</sub></b>    | -709.195646  | 0          | -17.11     | —                   |
| <b>MC1a@CP<sub>6R-in</sub></b>  | -1148.758868 | 0          | -38.27     | —                   |
| <b>TS1a@CP<sub>6R-in</sub></b>  | -1148.750316 | 1          | -32.90     | 5.37                |
| <b>IN1a@CP<sub>6R-in</sub></b>  | -1148.755829 | 0          | -36.36     | —                   |
| <b>TS2a@CP<sub>6R-in</sub></b>  | -1148.742870 | 1          | -28.23     | 10.04               |
| <b>P1a@CP<sub>6R-in</sub></b>   | -1148.765768 | 0          | -42.60     | —                   |
| <b>MC1b@CP<sub>6R-in</sub></b>  | -1148.755900 | 0          | -36.40     | —                   |
| <b>TS2b@CP<sub>6R-in</sub></b>  | -1148.738450 | 1          | -25.45     | 10.95               |
| <b>MC1c@CP<sub>6R-in</sub></b>  | -1148.747903 | 0          | -31.39     | —                   |
| <b>TS2c@CP<sub>6R-in</sub></b>  | -1148.727967 | 1          | -18.88     | 12.51               |
| <b>MC1d@CP<sub>6R-in</sub></b>  | -1148.742797 | 0          | -28.18     | —                   |
| <b>TS2d@CP<sub>6R-in</sub></b>  | -1148.725172 | 1          | -17.12     | 11.06               |
| <b>MC1a@CP<sub>6R-out</sub></b> | -1148.741158 | 0          | -27.15     | —                   |
| <b>TS2a@CP<sub>6R-out</sub></b> | -1148.724515 | 1          | -16.71     | 10.44               |
| <b>MC1b@CP<sub>6R-out</sub></b> | -1148.741218 | 0          | -27.19     | —                   |
| <b>TS2b@CP<sub>6R-out</sub></b> | -1148.724868 | 1          | -16.93     | 10.26               |
| <b>MC1c@CP<sub>6R-out</sub></b> | -1148.730451 | 0          | -20.43     | —                   |
| <b>TS2c@CP<sub>6R-out</sub></b> | -1148.710037 | 1          | -7.62      | 12.81               |
| <b>MC1d@CP<sub>6R-out</sub></b> | -1148.732184 | 0          | -21.52     | —                   |
| <b>TS2d@CP<sub>6R-out</sub></b> | -1148.715356 | 1          | -10.96     | 10.56               |

|                            |              |   |        |       |
|----------------------------|--------------|---|--------|-------|
| MC2a@CP <sub>6R</sub> -in  | -1148.749130 | 0 | -32.16 | —     |
| TS3a@CP <sub>6R</sub> -in  | -1148.720153 | 1 | -13.97 | 18.18 |
| MC2b@CP <sub>6R</sub> -in  | -1148.758240 | 0 | -37.87 | —     |
| TS3b@CP <sub>6R</sub> -in  | -1148.738878 | 1 | -25.72 | 12.15 |
| MC2c@CP <sub>6R</sub> -in  | -1148.753040 | 0 | -34.61 | —     |
| TS3c@CP <sub>6R</sub> -in  | -1148.721739 | 1 | -14.97 | 19.64 |
| MC2d@CP <sub>6R</sub> -in  | -1148.741520 | 0 | -27.38 | —     |
| TS3d@CP <sub>6R</sub> -in  | -1148.715305 | 1 | -10.93 | 16.45 |
| MC2a@CP <sub>6R</sub> -out | -1148.735132 | 0 | -23.37 | —     |
| TS3a@CP <sub>6R</sub> -out | -1148.705996 | 1 | -5.09  | 18.28 |
| MC2b@CP <sub>6R</sub> -out | -1148.728524 | 0 | -19.23 | —     |
| TS3b@CP <sub>6R</sub> -out | -1148.710006 | 1 | -7.61  | 11.62 |
| MC2c@CP <sub>6R</sub> -out | -1148.746056 | 0 | -30.23 | —     |
| TS3c@CP <sub>6R</sub> -out | -1148.709569 | 1 | -7.33  | 22.90 |
| MC2d@CP <sub>6R</sub> -out | -1148.727034 | 0 | -18.29 | —     |
| TS3d@CP <sub>6R</sub> -out | -1148.700245 | 1 | -1.48  | 16.81 |

<sup>a</sup> Referred to those of the CP<sub>6R</sub> host and the corresponding **3** and **I** non-encapsulated guests.

<sup>b</sup> Relative to the corresponding MC@CP<sub>6R</sub>.

## 7.2. Cartesian coordinates for selected fully optimized compounds and transition states

### MC1a@CP<sub>6R</sub>-in

| Center Number | Atomic Number | Atomic Type | Coordinates (Angstroms) |          |           |
|---------------|---------------|-------------|-------------------------|----------|-----------|
|               |               |             | X                       | Y        | Z         |
| 1             | 6             | 0           | -0.628624               | 8.290053 | -2.557617 |
| 2             | 8             | 0           | -2.677666               | 4.065512 | -6.839283 |
| 3             | 8             | 0           | -0.112082               | 2.701533 | -7.577831 |
| 4             | 6             | 0           | -0.048047               | 7.263018 | -0.402543 |
| 5             | 8             | 0           | -2.287580               | 7.273541 | -1.040191 |
| 6             | 8             | 0           | 2.155403                | 7.243309 | 0.410983  |
| 7             | 8             | 0           | 4.493549                | 2.975914 | -6.313794 |
| 8             | 6             | 0           | 3.152628                | 8.664044 | -1.972894 |
| 9             | 8             | 0           | -3.960672               | 7.108008 | -3.289490 |
| 10            | 6             | 0           | -1.677999               | 8.648118 | -3.590702 |
| 11            | 8             | 0           | 2.340466                | 1.473877 | -7.108316 |
| 12            | 6             | 0           | -1.935749               | 7.446262 | -4.476874 |
| 13            | 8             | 0           | -0.382504               | 6.533926 | 0.717090  |
| 14            | 6             | 0           | 1.699387                | 8.284748 | -1.776423 |
| 15            | 6             | 0           | 4.440944                | 5.726228 | -5.951825 |
| 16            | 8             | 0           | 6.025913                | 4.195566 | -4.045272 |
| 17            | 8             | 0           | 4.927815                | 7.188978 | -0.469524 |
| 18            | 8             | 0           | 6.365521                | 5.042279 | -1.402592 |
| 19            | 8             | 0           | -4.468261               | 4.735916 | -4.822283 |
| 20            | 6             | 0           | 1.302640                | 7.606569 | -0.604673 |
| 21            | 6             | 0           | -0.426118               | 5.589910 | -7.487029 |
| 22            | 6             | 0           | -1.001650               | 7.622251 | -1.377894 |
| 23            | 6             | 0           | 3.191767                | 4.966004 | -6.339460 |
| 24            | 6             | 0           | 2.145537                | 2.822408 | -6.916425 |
| 25            | 6             | 0           | 0.846539                | 4.897295 | -7.046815 |
| 26            | 6             | 0           | 3.274076                | 3.570197 | -6.517040 |
| 27            | 6             | 0           | 3.758988                | 7.118597 | -3.922021 |
| 28            | 6             | 0           | -3.342714               | 5.511223 | -5.014441 |
| 29            | 6             | 0           | 1.969253                | 5.599508 | -6.594440 |
| 30            | 6             | 0           | -1.311690               | 5.947786 | -6.315343 |
| 31            | 6             | 0           | -1.060434               | 7.056030 | -5.496293 |
| 32            | 6             | 0           | -3.096673               | 6.675455 | -4.266846 |
| 33            | 6             | 0           | 0.727405                | 8.590507 | -2.735649 |
| 34            | 6             | 0           | 4.477816                | 6.050871 | -4.472791 |
| 35            | 6             | 0           | -2.452094               | 5.163291 | -6.048829 |
| 36            | 6             | 0           | 0.936929                | 3.496139 | -7.167894 |
| 37            | 6             | 0           | 3.904155                | 7.498338 | -2.582830 |
| 38            | 6             | 0           | 5.315609                | 5.296719 | -3.625774 |
| 39            | 6             | 0           | 5.497597                | 5.658467 | -2.277519 |
| 40            | 6             | 0           | 4.794563                | 6.768797 | -1.771825 |
| 41            | 6             | 0           | 3.344999                | 9.946019 | -2.788702 |
| 42            | 6             | 0           | -0.137520               | 6.805373 | -8.375158 |
| 43            | 6             | 0           | 4.641590                | 6.981121 | -6.808869 |

|     |   |   |           |           |           |
|-----|---|---|-----------|-----------|-----------|
| 44  | 6 | 0 | -1.331092 | 9.895831  | -4.407650 |
| 45  | 1 | 0 | -3.538618 | 3.601680  | -6.561807 |
| 46  | 1 | 0 | -0.974583 | 3.242516  | -7.645723 |
| 47  | 1 | 0 | -2.909008 | 7.230734  | -1.852763 |
| 48  | 1 | 0 | 3.129152  | 7.240366  | 0.112644  |
| 49  | 1 | 0 | 4.469428  | 1.994034  | -6.582802 |
| 50  | 1 | 0 | 3.591450  | 8.873272  | -0.951023 |
| 51  | 1 | 0 | -4.766775 | 6.482165  | -3.197185 |
| 52  | 1 | 0 | -2.633866 | 8.889602  | -3.036549 |
| 53  | 1 | 0 | 1.459472  | 0.984645  | -7.228654 |
| 54  | 1 | 0 | -1.390260 | 6.550547  | 0.867321  |
| 55  | 1 | 0 | 5.324646  | 5.046166  | -6.171921 |
| 56  | 1 | 0 | 5.743661  | 3.917848  | -4.987415 |
| 57  | 1 | 0 | 5.630933  | 6.650944  | 0.027500  |
| 58  | 1 | 0 | 6.731703  | 4.178161  | -1.785866 |
| 59  | 1 | 0 | -4.515060 | 4.433906  | -3.838668 |
| 60  | 1 | 0 | -1.004881 | 4.854967  | -8.131897 |
| 61  | 1 | 0 | 3.070460  | 7.678356  | -4.556770 |
| 62  | 1 | 0 | 1.898017  | 6.679820  | -6.460932 |
| 63  | 1 | 0 | -0.153721 | 7.640613  | -5.663452 |
| 64  | 1 | 0 | 1.037085  | 9.091962  | -3.655121 |
| 65  | 1 | 0 | 4.408114  | 10.217203 | -2.833368 |
| 66  | 1 | 0 | 2.993925  | 9.848570  | -3.821077 |
| 67  | 1 | 0 | 2.808104  | 10.786665 | -2.332248 |
| 68  | 1 | 0 | 0.463456  | 6.518558  | -9.247287 |
| 69  | 1 | 0 | -1.071379 | 7.247266  | -8.745319 |
| 70  | 1 | 0 | 0.408599  | 7.593722  | -7.847710 |
| 71  | 1 | 0 | 3.841326  | 7.715847  | -6.675845 |
| 72  | 1 | 0 | 5.586531  | 7.479095  | -6.557346 |
| 73  | 1 | 0 | 4.675462  | 6.722959  | -7.874975 |
| 74  | 1 | 0 | -1.173886 | 10.762320 | -3.753514 |
| 75  | 1 | 0 | -0.427984 | 9.769238  | -5.013334 |
| 76  | 1 | 0 | -2.149884 | 10.144938 | -5.095513 |
| 77  | 6 | 0 | 4.216933  | 0.558451  | 7.162970  |
| 78  | 8 | 0 | -1.390747 | 3.779392  | 7.250778  |
| 79  | 8 | 0 | -0.736863 | 5.987740  | 5.600877  |
| 80  | 6 | 0 | 4.993780  | -0.787043 | 5.277727  |
| 81  | 8 | 0 | 3.299743  | -1.625794 | 6.783268  |
| 82  | 8 | 0 | 6.661087  | -0.066622 | 3.816168  |
| 83  | 8 | 0 | 2.830904  | 7.608650  | 2.745371  |
| 84  | 6 | 0 | 7.149124  | 2.371595  | 5.434484  |
| 85  | 8 | 0 | 0.760238  | -0.386074 | 8.128710  |
| 86  | 6 | 0 | 3.302999  | 0.719242  | 8.359702  |
| 87  | 8 | 0 | 0.026170  | 7.175644  | 3.223695  |
| 88  | 6 | 0 | 2.101038  | 1.580798  | 8.030314  |
| 89  | 8 | 0 | 4.875612  | -1.965612 | 4.568739  |
| 90  | 6 | 0 | 6.049326  | 1.370804  | 5.731615  |
| 91  | 6 | 0 | 4.799224  | 6.820490  | 4.537372  |
| 92  | 8 | 0 | 4.993508  | 6.087999  | 1.694976  |
| 93  | 8 | 0 | 7.628172  | 2.244355  | 2.688103  |
| 94  | 8 | 0 | 6.393644  | 3.858479  | 0.860311  |
| 95  | 8 | 0 | -1.483868 | 0.997111  | 7.449251  |
| 96  | 6 | 0 | 5.921065  | 0.214352  | 4.942293  |
| 97  | 6 | 0 | 1.060304  | 5.271883  | 7.635675  |
| 98  | 6 | 0 | 4.161665  | -0.631232 | 6.404403  |
| 99  | 6 | 0 | 3.333296  | 6.593305  | 4.831178  |
| 100 | 6 | 0 | 1.000247  | 6.769433  | 4.110391  |
| 101 | 6 | 0 | 1.534922  | 5.814552  | 6.305989  |
| 102 | 6 | 0 | 2.370426  | 6.992707  | 3.883729  |
| 103 | 6 | 0 | 5.938201  | 4.571659  | 4.938582  |
| 104 | 6 | 0 | -0.311842 | 1.716006  | 7.606645  |
| 105 | 6 | 0 | 2.891746  | 6.000508  | 6.019280  |
| 106 | 6 | 0 | 1.030085  | 3.757970  | 7.649224  |
| 107 | 6 | 0 | 2.167148  | 2.972126  | 7.881110  |
| 108 | 6 | 0 | 0.839830  | 0.960399  | 7.914122  |
| 109 | 6 | 0 | 5.157460  | 1.531292  | 6.802444  |
| 110 | 6 | 0 | 5.430649  | 5.531859  | 4.053237  |
| 111 | 6 | 0 | -0.209154 | 3.108633  | 7.479373  |
| 112 | 6 | 0 | 0.591091  | 6.183012  | 5.324795  |
| 113 | 6 | 0 | 6.628414  | 3.438194  | 4.495417  |
| 114 | 6 | 0 | 5.530166  | 5.284093  | 2.671369  |
| 115 | 6 | 0 | 6.230280  | 4.161677  | 2.189837  |
| 116 | 6 | 0 | 6.828033  | 3.281767  | 3.110109  |
| 117 | 6 | 0 | 7.771375  | 2.957659  | 6.704940  |
| 118 | 6 | 0 | 1.860487  | 5.834397  | 8.815578  |
| 119 | 6 | 0 | 5.545629  | 7.427611  | 5.729367  |
| 120 | 6 | 0 | 4.050803  | 1.247609  | 9.589676  |
| 121 | 1 | 0 | -1.210584 | 4.746388  | 6.975376  |



|     |   |   |           |           |           |
|-----|---|---|-----------|-----------|-----------|
| 122 | 1 | 0 | -1.314731 | 6.208047  | 4.789249  |
| 123 | 1 | 0 | 3.495188  | -2.484947 | 6.267302  |
| 124 | 1 | 0 | 7.159025  | 0.759598  | 3.466093  |
| 125 | 1 | 0 | 2.068905  | 7.849416  | 2.109744  |
| 126 | 1 | 0 | 7.980198  | 1.819537  | 4.900585  |
| 127 | 1 | 0 | -0.169185 | -0.721600 | 7.938317  |
| 128 | 1 | 0 | 2.919634  | -0.314507 | 8.626073  |
| 129 | 1 | 0 | 0.252337  | 6.863778  | 2.265986  |
| 130 | 1 | 0 | 5.591083  | -2.020365 | 3.841483  |
| 131 | 1 | 0 | 4.872695  | 7.577509  | 3.699323  |
| 132 | 1 | 0 | 4.269387  | 6.706398  | 2.067214  |
| 133 | 1 | 0 | 7.741417  | 2.256260  | 1.670094  |
| 134 | 1 | 0 | 5.939335  | 4.555250  | 0.266071  |
| 135 | 1 | 0 | -2.284587 | 1.607417  | 7.563050  |
| 136 | 1 | 0 | -0.006897 | 5.634710  | 7.774277  |
| 137 | 1 | 0 | 5.800353  | 4.717614  | 6.011256  |
| 138 | 1 | 0 | 3.633548  | 5.682453  | 6.754895  |
| 139 | 1 | 0 | 3.137301  | 3.463588  | 7.965645  |
| 140 | 1 | 0 | 5.212295  | 2.447447  | 7.393968  |
| 141 | 1 | 0 | 8.169403  | 2.161763  | 7.347136  |
| 142 | 1 | 0 | 8.602081  | 3.629984  | 6.455444  |
| 143 | 1 | 0 | 7.054818  | 3.530950  | 7.302264  |
| 144 | 1 | 0 | 2.912948  | 5.534215  | 8.792908  |
| 145 | 1 | 0 | 1.444518  | 5.484174  | 9.768874  |
| 146 | 1 | 0 | 1.830466  | 6.930964  | 8.821750  |
| 147 | 1 | 0 | 5.525068  | 6.785123  | 6.615422  |
| 148 | 1 | 0 | 5.101432  | 8.389959  | 6.014326  |
| 149 | 1 | 0 | 6.598681  | 7.608315  | 5.479767  |
| 150 | 1 | 0 | 4.899159  | 0.598619  | 9.838139  |
| 151 | 1 | 0 | 3.386506  | 1.272480  | 10.462608 |
| 152 | 1 | 0 | 4.439340  | 2.260074  | 9.447298  |
| 153 | 6 | 0 | 5.578905  | -3.472044 | -5.296509 |
| 154 | 8 | 0 | 5.001621  | -7.398567 | -0.160758 |
| 155 | 8 | 0 | 5.921670  | -5.720805 | 1.755916  |
| 156 | 6 | 0 | 4.323592  | -1.423304 | -5.754536 |
| 157 | 8 | 0 | 3.316419  | -3.613494 | -6.032234 |
| 158 | 8 | 0 | 5.306390  | 0.687240  | -5.584506 |
| 159 | 8 | 0 | 8.096853  | -1.546172 | 2.461087  |
| 160 | 6 | 0 | 7.894621  | -0.437092 | -4.766414 |
| 161 | 8 | 0 | 3.055266  | -5.943076 | -4.257503 |
| 162 | 6 | 0 | 5.619841  | -4.984709 | -5.280221 |
| 163 | 8 | 0 | 6.338715  | -3.519878 | 3.292501  |
| 164 | 6 | 0 | 5.445434  | -5.529687 | -3.877963 |
| 165 | 8 | 0 | 3.135437  | -0.851136 | -6.149191 |
| 166 | 6 | 0 | 6.672136  | -1.287506 | -5.056019 |
| 167 | 6 | 0 | 9.374977  | -1.558047 | -0.002824 |
| 168 | 8 | 0 | 7.595993  | 0.663564  | 0.814850  |
| 169 | 8 | 0 | 6.746910  | 1.904995  | -3.684426 |
| 170 | 8 | 0 | 6.478422  | 2.370989  | -1.043887 |
| 171 | 8 | 0 | 2.880868  | -7.294771 | -1.814109 |
| 172 | 6 | 0 | 5.470174  | -0.667423 | -5.445788 |
| 173 | 6 | 0 | 7.501716  | -6.258851 | -0.700763 |
| 174 | 6 | 0 | 4.388405  | -2.828624 | -5.695597 |
| 175 | 6 | 0 | 8.532144  | -2.732720 | 0.445769  |
| 176 | 6 | 0 | 6.980268  | -3.674382 | 2.082850  |
| 177 | 6 | 0 | 7.571106  | -4.961875 | 0.081515  |
| 178 | 6 | 0 | 7.859367  | -2.655467 | 1.682253  |
| 179 | 6 | 0 | 8.602071  | -0.960775 | -2.359838 |
| 180 | 6 | 0 | 4.029498  | -6.687802 | -2.249515 |
| 181 | 6 | 0 | 8.379548  | -3.890804 | -0.323413 |
| 182 | 6 | 0 | 6.378361  | -6.195130 | -1.711506 |
| 183 | 6 | 0 | 6.509044  | -5.595409 | -2.969681 |
| 184 | 6 | 0 | 4.184665  | -6.034959 | -3.490900 |
| 185 | 6 | 0 | 6.689243  | -2.685528 | -4.967920 |
| 186 | 6 | 0 | 8.585129  | -0.710666 | -0.980603 |
| 187 | 6 | 0 | 5.132641  | -6.754118 | -1.380385 |
| 188 | 6 | 0 | 6.829381  | -4.817496 | 1.269185  |
| 189 | 6 | 0 | 7.949843  | -0.135191 | -3.283310 |
| 190 | 6 | 0 | 7.817627  | 0.372636  | -0.510269 |
| 191 | 6 | 0 | 7.193519  | 1.254849  | -1.411622 |
| 192 | 6 | 0 | 7.285163  | 1.003915  | -2.792242 |
| 193 | 6 | 0 | 9.185919  | -1.061792 | -5.300219 |
| 194 | 6 | 0 | 8.840816  | -6.637967 | -1.339583 |
| 195 | 6 | 0 | 10.733468 | -1.994059 | -0.558620 |
| 196 | 6 | 0 | 6.880317  | -5.535036 | -5.956571 |
| 197 | 1 | 0 | 4.017968  | -7.535381 | 0.036888  |
| 198 | 1 | 0 | 5.743964  | -6.498533 | 1.093217  |
| 199 | 1 | 0 | 2.514424  | -3.037699 | -6.306980 |

|     |   |   |           |           |           |
|-----|---|---|-----------|-----------|-----------|
| 200 | 1 | 0 | 5.966650  | 1.210226  | -4.995702 |
| 201 | 1 | 0 | 7.602083  | -1.596895 | 3.349201  |
| 202 | 1 | 0 | 7.767940  | 0.546562  | -5.310281 |
| 203 | 1 | 0 | 3.199049  | -5.313966 | -5.043655 |
| 204 | 1 | 0 | 4.741909  | -5.350956 | -5.898833 |
| 205 | 1 | 0 | 5.576293  | -4.199680 | 3.384225  |
| 206 | 1 | 0 | 3.224539  | 0.167206  | -6.150537 |
| 207 | 1 | 0 | 9.595471  | -0.920272 | 0.905512  |
| 208 | 1 | 0 | 7.886719  | -0.096913 | 1.432338  |
| 209 | 1 | 0 | 6.099892  | 2.540165  | -3.206700 |
| 210 | 1 | 0 | 6.094508  | 2.248935  | -0.101837 |
| 211 | 1 | 0 | 2.068701  | -6.694953 | -2.040622 |
| 212 | 1 | 0 | 7.257080  | -7.084545 | 0.034226  |
| 213 | 1 | 0 | 9.149228  | -1.830211 | -2.729237 |
| 214 | 1 | 0 | 8.917989  | -3.966171 | -1.270619 |
| 215 | 1 | 0 | 7.473018  | -5.172848 | -3.254351 |
| 216 | 1 | 0 | 7.607706  | -3.182006 | -4.651067 |
| 217 | 1 | 0 | 9.117012  | -1.228836 | -6.382962 |
| 218 | 1 | 0 | 10.042157 | -0.399614 | -5.120437 |
| 219 | 1 | 0 | 9.413369  | -2.027206 | -4.836664 |
| 220 | 1 | 0 | 9.169700  | -5.916883 | -2.094731 |
| 221 | 1 | 0 | 9.631272  | -6.709231 | -0.582392 |
| 222 | 1 | 0 | 8.766885  | -7.615000 | -1.835443 |
| 223 | 1 | 0 | 10.645607 | -2.642254 | -1.436603 |
| 224 | 1 | 0 | 11.332638 | -1.123009 | -0.853071 |
| 225 | 1 | 0 | 11.302509 | -2.547502 | 0.199511  |
| 226 | 1 | 0 | 7.799962  | -5.235567 | -5.444543 |
| 227 | 1 | 0 | 6.861702  | -6.632027 | -5.979102 |
| 228 | 1 | 0 | 6.951549  | -5.181101 | -6.992597 |
| 229 | 6 | 0 | -4.826158 | -0.564332 | -6.922347 |
| 230 | 8 | 0 | 0.908083  | -3.028137 | -5.505160 |
| 231 | 8 | 0 | -0.062359 | -4.930818 | -3.713650 |
| 232 | 6 | 0 | -5.916555 | 0.948042  | -5.331535 |
| 233 | 8 | 0 | -3.990828 | 1.695820  | -6.426991 |
| 234 | 8 | 0 | -7.878794 | 0.319356  | -4.182842 |
| 235 | 8 | 0 | -3.994676 | -7.132681 | -1.865393 |
| 236 | 6 | 0 | -7.938754 | -2.293000 | -5.445798 |
| 237 | 8 | 0 | -1.519039 | 0.728450  | -7.174709 |
| 238 | 6 | 0 | -3.738117 | -0.796132 | -7.951099 |
| 239 | 8 | 0 | -1.462037 | -6.422014 | -1.498778 |
| 240 | 6 | 0 | -2.528221 | -1.433096 | -7.299859 |
| 241 | 8 | 0 | -6.009598 | 2.145964  | -4.648022 |
| 242 | 6 | 0 | -6.842283 | -1.283946 | -5.721547 |
| 243 | 6 | 0 | -5.519862 | -6.591980 | -4.151023 |
| 244 | 8 | 0 | -6.499236 | -6.076796 | -1.435205 |
| 245 | 8 | 0 | -8.699277 | -2.054031 | -2.764635 |
| 246 | 8 | 0 | -8.012624 | -3.877196 | -0.799490 |
| 247 | 8 | 0 | 0.718653  | -0.304616 | -5.994437 |
| 248 | 6 | 0 | -6.890633 | -0.033770 | -5.072295 |
| 249 | 6 | 0 | -1.190326 | -4.884304 | -6.253276 |
| 250 | 6 | 0 | -4.885169 | 0.671543  | -6.249753 |
| 251 | 6 | 0 | -4.050639 | -6.237229 | -4.075973 |
| 252 | 6 | 0 | -2.004155 | -6.078297 | -2.729848 |
| 253 | 6 | 0 | -1.993377 | -5.325742 | -5.049522 |
| 254 | 6 | 0 | -3.348697 | -6.476022 | -2.881677 |
| 255 | 6 | 0 | -6.700462 | -4.402241 | -4.727203 |
| 256 | 6 | 0 | -0.288884 | -1.176266 | -6.328400 |
| 257 | 6 | 0 | -3.344476 | -5.673940 | -5.146012 |
| 258 | 6 | 0 | -1.314766 | -3.394328 | -6.476070 |
| 259 | 6 | 0 | -2.447258 | -2.809133 | -7.052649 |
| 260 | 6 | 0 | -1.438326 | -0.624105 | -6.926540 |
| 261 | 6 | 0 | -5.798943 | -1.527243 | -6.622514 |
| 262 | 6 | 0 | -6.342669 | -5.372809 | -3.784561 |
| 263 | 6 | 0 | -0.241351 | -2.564079 | -6.103604 |
| 264 | 6 | 0 | -1.342810 | -5.452157 | -3.801224 |
| 265 | 6 | 0 | -7.496575 | -3.297414 | -4.402719 |
| 266 | 6 | 0 | -6.768942 | -5.197853 | -2.453339 |
| 267 | 6 | 0 | -7.549154 | -4.084799 | -2.085654 |
| 268 | 6 | 0 | -7.916093 | -3.142194 | -3.065074 |
| 269 | 6 | 0 | -8.438321 | -2.969932 | -6.726190 |
| 270 | 6 | 0 | -1.537434 | -5.680006 | -7.515620 |
| 271 | 6 | 0 | -5.921724 | -7.193787 | -5.499453 |
| 272 | 6 | 0 | -4.230293 | -1.594310 | -9.162033 |
| 273 | 1 | 0 | 0.756455  | -3.949118 | -5.082294 |
| 274 | 1 | 0 | 0.404091  | -5.211550 | -2.873759 |
| 275 | 1 | 0 | -3.109023 | 1.359804  | -6.837156 |
| 276 | 1 | 0 | -8.308280 | -0.507922 | -3.763305 |
| 277 | 1 | 0 | -3.381313 | -7.253466 | -1.045660 |

|     |   |   |            |           |           |
|-----|---|---|------------|-----------|-----------|
| 278 | 1 | 0 | -8.824666  | -1.729406 | -5.019064 |
| 279 | 1 | 0 | -0.735351  | 1.225047  | -6.739087 |
| 280 | 1 | 0 | -3.420780  | 0.216033  | -8.347032 |
| 281 | 1 | 0 | -0.514437  | -6.088276 | -1.400559 |
| 282 | 1 | 0 | -5.482964  | 2.865009  | -5.125974 |
| 283 | 1 | 0 | -5.718060  | -7.390440 | -3.372404 |
| 284 | 1 | 0 | -5.724120  | -6.698564 | -1.686982 |
| 285 | 1 | 0 | -8.923007  | -2.019449 | -1.773414 |
| 286 | 1 | 0 | -7.695670  | -4.624512 | -0.196861 |
| 287 | 1 | 0 | 1.405078   | -0.775609 | -5.392201 |
| 288 | 1 | 0 | -0.102191  | -5.111508 | -6.021445 |
| 289 | 1 | 0 | -6.354921  | -4.515987 | -5.756534 |
| 290 | 1 | 0 | -3.863351  | -5.517017 | -6.093299 |
| 291 | 1 | 0 | -3.292529  | -3.444551 | -7.320084 |
| 292 | 1 | 0 | -5.749058  | -2.498162 | -7.119201 |
| 293 | 1 | 0 | -7.661521  | -3.556933 | -7.226449 |
| 294 | 1 | 0 | -8.800571  | -2.224750 | -7.445522 |
| 295 | 1 | 0 | -9.270433  | -3.650962 | -6.505910 |
| 296 | 1 | 0 | -1.409082  | -6.756798 | -7.346065 |
| 297 | 1 | 0 | -0.881395  | -5.394945 | -8.347876 |
| 298 | 1 | 0 | -2.568430  | -5.520619 | -7.846775 |
| 299 | 1 | 0 | -5.340640  | -8.101438 | -5.707865 |
| 300 | 1 | 0 | -5.762601  | -6.505018 | -6.335422 |
| 301 | 1 | 0 | -6.983315  | -7.471688 | -5.501542 |
| 302 | 1 | 0 | -3.435335  | -1.686781 | -9.913564 |
| 303 | 1 | 0 | -5.081828  | -1.094163 | -9.640020 |
| 304 | 1 | 0 | -4.548899  | -2.608539 | -8.900667 |
| 305 | 6 | 0 | -5.937441  | 4.015657  | 5.321736  |
| 306 | 8 | 0 | -4.242704  | 7.680781  | 0.282994  |
| 307 | 8 | 0 | -4.883190  | 5.655825  | -1.597424 |
| 308 | 6 | 0 | -4.801906  | 1.909201  | 5.837628  |
| 309 | 8 | 0 | -3.681661  | 4.032508  | 6.114234  |
| 310 | 8 | 0 | -5.870025  | -0.163743 | 5.608376  |
| 311 | 8 | 0 | -7.136563  | 1.522859  | -2.099558 |
| 312 | 6 | 0 | -8.361651  | 1.079833  | 4.709621  |
| 313 | 8 | 0 | -3.154902  | 6.435401  | 4.773055  |
| 314 | 6 | 0 | -5.884635  | 5.527246  | 5.289576  |
| 315 | 8 | 0 | -5.011284  | 3.237354  | -2.652916 |
| 316 | 6 | 0 | -5.421553  | 6.014643  | 3.932004  |
| 317 | 8 | 0 | -3.647565  | 1.326612  | 6.297385  |
| 318 | 6 | 0 | -7.117190  | 1.880379  | 5.038376  |
| 319 | 6 | 0 | -9.175919  | 2.157844  | -0.210449 |
| 320 | 8 | 0 | -8.265837  | -0.569118 | -0.747838 |
| 321 | 8 | 0 | -7.688755  | -1.503889 | 3.910582  |
| 322 | 8 | 0 | -7.582334  | -2.312349 | 1.242907  |
| 323 | 8 | 0 | -2.391758  | 7.464101  | 2.282495  |
| 324 | 6 | 0 | -5.960803  | 1.201608  | 5.471283  |
| 325 | 6 | 0 | -6.813648  | 6.647969  | 0.398278  |
| 326 | 6 | 0 | -4.794651  | 3.315176  | 5.751702  |
| 327 | 6 | 0 | -8.056215  | 3.125385  | -0.528168 |
| 328 | 6 | 0 | -6.009808  | 3.605646  | -1.786858 |
| 329 | 6 | 0 | -6.900745  | 5.270954  | -0.231612 |
| 330 | 6 | 0 | -7.094422  | 2.760885  | -1.484761 |
| 331 | 6 | 0 | -8.711119  | 1.578817  | 2.232404  |
| 332 | 6 | 0 | -3.666559  | 7.010205  | 2.545496  |
| 333 | 6 | 0 | -7.926179  | 4.372897  | 0.094427  |
| 334 | 6 | 0 | -5.893387  | 6.595947  | 1.600252  |
| 335 | 6 | 0 | -6.283630  | 6.053309  | 2.829551  |
| 336 | 6 | 0 | -4.094374  | 6.461229  | 3.767990  |
| 337 | 6 | 0 | -7.071502  | 3.278014  | 4.957588  |
| 338 | 6 | 0 | -8.730576  | 1.207513  | 0.881698  |
| 339 | 6 | 0 | -4.586283  | 7.105703  | 1.483651  |
| 340 | 6 | 0 | -5.931907  | 4.872752  | -1.174009 |
| 341 | 6 | 0 | -8.360590  | 0.681489  | 3.247406  |
| 342 | 6 | 0 | -8.325820  | -0.095637 | 0.543207  |
| 343 | 6 | 0 | -7.963404  | -1.026624 | 1.537182  |
| 344 | 6 | 0 | -8.000529  | -0.633748 | 2.887824  |
| 345 | 6 | 0 | -9.654681  | 1.798549  | 5.105774  |
| 346 | 6 | 0 | -8.180689  | 7.240501  | 0.751972  |
| 347 | 6 | 0 | -10.494902 | 2.852996  | 0.137565  |
| 348 | 6 | 0 | -7.205394  | 6.179460  | 5.708519  |
| 349 | 1 | 0 | -3.279552  | 8.026126  | 0.301518  |
| 350 | 1 | 0 | -4.607906  | 6.343979  | -0.894295 |
| 351 | 1 | 0 | -2.883643  | 3.411267  | 6.269682  |
| 352 | 1 | 0 | -6.640936  | -0.646628 | 5.141316  |
| 353 | 1 | 0 | -7.312689  | 1.620668  | -3.108101 |
| 354 | 1 | 0 | -8.325883  | 0.129755  | 5.325919  |
| 355 | 1 | 0 | -3.438555  | 5.785912  | 5.512851  |

|     |   |   |            |           |           |
|-----|---|---|------------|-----------|-----------|
| 356 | 1 | 0 | -5.111708  | 5.849078  | 6.054582  |
| 357 | 1 | 0 | -5.191712  | 2.294733  | -3.022657 |
| 358 | 1 | 0 | -3.642409  | 0.316297  | 6.126114  |
| 359 | 1 | 0 | -9.368800  | 1.549477  | -1.144280 |
| 360 | 1 | 0 | -7.953038  | 0.173390  | -1.388373 |
| 361 | 1 | 0 | -7.426730  | -2.412214 | 3.551321  |
| 362 | 1 | 0 | -7.542673  | -2.441610 | 0.224094  |
| 363 | 1 | 0 | -1.853778  | 7.545208  | 3.136671  |
| 364 | 1 | 0 | -6.356281  | 7.344956  | -0.366415 |
| 365 | 1 | 0 | -8.979240  | 2.601271  | 2.502419  |
| 366 | 1 | 0 | -8.658157  | 4.661224  | 0.850761  |
| 367 | 1 | 0 | -7.292988  | 5.651229  | 2.932869  |
| 368 | 1 | 0 | -7.955666  | 3.814228  | 4.608831  |
| 369 | 1 | 0 | -9.650465  | 2.050311  | 6.173690  |
| 370 | 1 | 0 | -9.810573  | 2.727702  | 4.548283  |
| 371 | 1 | 0 | -10.526146 | 1.157515  | 4.919378  |
| 372 | 1 | 0 | -8.827610  | 7.291156  | -0.132560 |
| 373 | 1 | 0 | -8.709380  | 6.661226  | 1.516031  |
| 374 | 1 | 0 | -8.068762  | 8.261712  | 1.139423  |
| 375 | 1 | 0 | -10.818788 | 3.510877  | -0.678261 |
| 376 | 1 | 0 | -11.289705 | 2.114036  | 0.303414  |
| 377 | 1 | 0 | -10.426370 | 3.461521  | 1.045269  |
| 378 | 1 | 0 | -8.028453  | 5.944352  | 5.025989  |
| 379 | 1 | 0 | -7.503942  | 5.846440  | 6.710626  |
| 380 | 1 | 0 | -7.108795  | 7.272265  | 5.736468  |
| 381 | 6 | 0 | 0.049367   | -8.546671 | 2.780689  |
| 382 | 8 | 0 | 2.614549   | -3.043362 | 4.751458  |
| 383 | 8 | 0 | 0.290168   | -1.379471 | 5.933276  |
| 384 | 6 | 0 | -0.849820  | -8.605287 | 0.495079  |
| 385 | 8 | 0 | 1.527068   | -8.633470 | 0.890656  |
| 386 | 8 | 0 | -3.173507  | -8.631557 | 0.082690  |
| 387 | 8 | 0 | -4.379167  | -2.085862 | 5.684152  |
| 388 | 6 | 0 | -3.795563  | -8.743000 | 2.921288  |
| 389 | 8 | 0 | 3.187164   | -6.975448 | 2.118449  |
| 390 | 6 | 0 | 1.252941   | -8.485206 | 3.698793  |
| 391 | 8 | 0 | -2.223280  | -0.451614 | 5.403351  |
| 392 | 6 | 0 | 1.607668   | -7.041170 | 3.997130  |
| 393 | 8 | 0 | -0.517463  | -8.649082 | -0.831479 |
| 394 | 6 | 0 | -2.374637  | -8.633562 | 2.407089  |
| 395 | 6 | 0 | -4.237590  | -4.827970 | 6.151237  |
| 396 | 8 | 0 | -5.956680  | -3.602699 | 4.080753  |
| 397 | 8 | 0 | -5.480308  | -7.341009 | 1.174202  |
| 398 | 8 | 0 | -6.507232  | -4.850883 | 1.712743  |
| 399 | 8 | 0 | 3.839614   | -4.369187 | 2.643959  |
| 400 | 6 | 0 | -2.156446  | -8.616546 | 1.014520  |
| 401 | 6 | 0 | 0.832853   | -4.224864 | 6.511807  |
| 402 | 6 | 0 | 0.242484   | -8.585264 | 1.388233  |
| 403 | 6 | 0 | -2.981532  | -3.987094 | 6.055043  |
| 404 | 6 | 0 | -1.988810  | -1.770740 | 5.724878  |
| 405 | 6 | 0 | -0.548967  | -3.686279 | 6.212209  |
| 406 | 6 | 0 | -3.112533  | -2.607362 | 5.802898  |
| 407 | 6 | 0 | -4.017247  | -6.732151 | 4.472781  |
| 408 | 6 | 0 | 2.928382   | -5.054747 | 3.427157  |
| 409 | 6 | 0 | -1.691537  | -4.499753 | 6.231912  |
| 410 | 6 | 0 | 1.393741   | -4.994661 | 5.334746  |
| 411 | 6 | 0 | 1.038819   | -6.319721 | 5.054288  |
| 412 | 6 | 0 | 2.558735   | -6.392671 | 3.184297  |
| 413 | 6 | 0 | -1.267685  | -8.568805 | 3.260463  |
| 414 | 6 | 0 | -4.537425  | -5.478595 | 4.816834  |
| 415 | 6 | 0 | 2.333066   | -4.359709 | 4.495269  |
| 416 | 6 | 0 | -0.705275  | -2.312183 | 5.944227  |
| 417 | 6 | 0 | -4.331659  | -7.371785 | 3.268284  |
| 418 | 6 | 0 | -5.375793  | -4.829997 | 3.888958  |
| 419 | 6 | 0 | -5.693364  | -5.433526 | 2.656283  |
| 420 | 6 | 0 | -5.175248  | -6.707038 | 2.357582  |
| 421 | 6 | 0 | -3.923777  | -9.732592 | 4.082263  |
| 422 | 6 | 0 | 0.857857   | -5.050457 | 7.802056  |
| 423 | 6 | 0 | -4.174654  | -5.837216 | 7.301662  |
| 424 | 6 | 0 | 1.076547   | -9.321477 | 4.968054  |
| 425 | 1 | 0 | 3.323414   | -2.671090 | 4.112196  |
| 426 | 1 | 0 | 1.212930   | -1.771239 | 6.138873  |
| 427 | 1 | 0 | 1.526640   | -8.492726 | -0.115918 |
| 428 | 1 | 0 | -4.084696  | -8.563669 | 0.540687  |
| 429 | 1 | 0 | -4.356685  | -1.106349 | 5.382939  |
| 430 | 1 | 0 | -4.434904  | -9.154196 | 2.078049  |
| 431 | 1 | 0 | 2.774994   | -7.892132 | 1.904836  |
| 432 | 1 | 0 | 2.125343   | -8.940397 | 3.134466  |
| 433 | 1 | 0 | -1.490755  | 0.151296  | 5.800241  |

|     |   |   |           |            |           |
|-----|---|---|-----------|------------|-----------|
| 434 | 1 | 0 | -1.269230 | -8.270040  | -1.402496 |
| 435 | 1 | 0 | -5.096759 | -4.129928  | 6.390747  |
| 436 | 1 | 0 | -5.496229 | -3.081614  | 4.834029  |
| 437 | 1 | 0 | -6.058801 | -6.749118  | 0.594729  |
| 438 | 1 | 0 | -6.668637 | -3.879219  | 1.952110  |
| 439 | 1 | 0 | 4.255105  | -5.014563  | 1.949200  |
| 440 | 1 | 0 | 1.512424  | -3.329518  | 6.689102  |
| 441 | 1 | 0 | -3.348104 | -7.235355  | 5.173209  |
| 442 | 1 | 0 | -1.571391 | -5.569829  | 6.409149  |
| 443 | 1 | 0 | 0.295501  | -6.810074  | 5.686229  |
| 444 | 1 | 0 | -1.434503 | -8.543720  | 4.338311  |
| 445 | 1 | 0 | -4.971768 | -9.835522  | 4.391802  |
| 446 | 1 | 0 | -3.563773 | -10.727097 | 3.789462  |
| 447 | 1 | 0 | -3.352861 | -9.425934  | 4.964645  |
| 448 | 1 | 0 | 0.521228  | -4.449102  | 8.656436  |
| 449 | 1 | 0 | 0.212409  | -5.932913  | 7.752630  |
| 450 | 1 | 0 | 1.874063  | -5.399151  | 8.024886  |
| 451 | 1 | 0 | -4.020323 | -5.323890  | 8.259441  |
| 452 | 1 | 0 | -5.112556 | -6.402122  | 7.376209  |
| 453 | 1 | 0 | -3.363339 | -6.562824  | 7.185582  |
| 454 | 1 | 0 | 1.985072  | -9.295388  | 5.583040  |
| 455 | 1 | 0 | 0.248158  | -8.972498  | 5.593305  |
| 456 | 1 | 0 | 0.876381  | -10.371427 | 4.717173  |
| 457 | 1 | 0 | -1.347114 | 0.803421   | -2.815523 |
| 458 | 1 | 0 | -1.202954 | -1.632043  | -3.377262 |
| 459 | 1 | 0 | 0.908055  | -2.842953  | -3.087685 |
| 460 | 1 | 0 | 6.216424  | -2.306990  | -2.208923 |
| 461 | 1 | 0 | 5.023650  | -3.569726  | -1.664903 |
| 462 | 1 | 0 | 5.793321  | -2.445708  | -0.484165 |
| 463 | 1 | 0 | 3.127427  | -3.005125  | -2.398703 |
| 464 | 1 | 0 | 4.615730  | 1.259049   | 2.323728  |
| 465 | 1 | 0 | 5.162677  | 1.163096   | 0.633092  |
| 466 | 1 | 0 | 3.491681  | 1.729465   | 1.012036  |
| 467 | 1 | 0 | 4.602247  | -1.146638  | 1.408168  |
| 468 | 1 | 0 | 1.766365  | -0.073796  | 0.840152  |
| 469 | 1 | 0 | 3.077778  | -2.913062  | 1.248356  |
| 470 | 1 | 0 | -1.008598 | -4.160702  | 1.740306  |
| 471 | 1 | 0 | -0.996051 | -5.228020  | 0.308111  |
| 472 | 1 | 0 | 1.353121  | -4.635825  | 1.611392  |
| 473 | 1 | 0 | -0.521411 | -1.521049  | 1.300876  |
| 474 | 6 | 0 | -1.022019 | -3.081882  | -0.144844 |
| 475 | 6 | 0 | -0.106442 | -1.981936  | 0.387853  |
| 476 | 7 | 0 | 1.119572  | -2.718841  | 0.766343  |
| 477 | 8 | 0 | 4.647001  | -0.386587  | -1.316445 |
| 478 | 6 | 0 | 3.198621  | -1.946057  | -2.168680 |
| 479 | 6 | 0 | -0.405249 | 0.263825   | -2.697524 |
| 480 | 6 | 0 | 1.647644  | -4.738187  | -0.515592 |
| 481 | 8 | 0 | 2.824262  | -4.411175  | -0.626753 |
| 482 | 6 | 0 | 2.018175  | -1.117328  | -2.364067 |
| 483 | 8 | 0 | 0.993801  | -5.505534  | -1.296182 |
| 484 | 6 | 0 | 2.277709  | -2.196552  | 1.019511  |
| 485 | 6 | 0 | 2.564290  | -0.795616  | 1.028376  |
| 486 | 6 | 0 | 3.836413  | -0.381707  | 1.231420  |
| 487 | 7 | 0 | 4.345521  | -1.562245  | -1.676022 |
| 488 | 6 | 0 | 5.409194  | -2.558018  | -1.506358 |
| 489 | 6 | 0 | 0.732557  | 0.934139   | -2.239389 |
| 490 | 1 | 0 | -0.797538 | -3.308299  | -1.197910 |
| 491 | 6 | 0 | 0.890075  | -4.180862  | 0.721163  |
| 492 | 6 | 0 | -0.629212 | -4.283889  | 0.711437  |
| 493 | 6 | 0 | -0.327144 | -1.093572  | -3.009893 |
| 494 | 6 | 0 | 0.873023  | -1.779525  | -2.845238 |
| 495 | 6 | 0 | 1.941180  | 0.260548   | -2.076762 |
| 496 | 1 | 0 | 0.136321  | -1.191282  | -0.334100 |
| 497 | 1 | 0 | -2.080877 | -2.804669  | -0.063833 |
| 498 | 6 | 0 | 4.290381  | 1.030732   | 1.292505  |
| 499 | 1 | 0 | 0.676929  | 2.000388   | -2.007049 |
| 500 | 1 | 0 | 2.832508  | 0.772090   | -1.719892 |

TS1a@CP6R-in

| Center Number | Atomic Number | Atomic Type | Coordinates (Angstroms) |          |           |
|---------------|---------------|-------------|-------------------------|----------|-----------|
|               |               |             | X                       | Y        | Z         |
| 1             | 6             | 0           | 0.690506                | 8.115310 | -2.988753 |
| 2             | 8             | 0           | -2.305004               | 4.160035 | -6.955828 |
| 3             | 8             | 0           | -0.051351               | 2.298045 | -7.547436 |

|    |   |   |           |           |           |
|----|---|---|-----------|-----------|-----------|
| 4  | 6 | 0 | 1.192740  | 7.067204  | -0.823450 |
| 5  | 8 | 0 | -1.040886 | 7.433696  | -1.367808 |
| 6  | 8 | 0 | 3.398259  | 6.701646  | -0.101240 |
| 7  | 8 | 0 | 4.595643  | 1.822651  | -6.528838 |
| 8  | 6 | 0 | 4.503992  | 7.869172  | -2.572810 |
| 9  | 8 | 0 | -2.845399 | 7.548878  | -3.530608 |
| 10 | 6 | 0 | -0.332258 | 8.615555  | -3.988967 |
| 11 | 8 | 0 | 2.155196  | 0.683391  | -7.048948 |
| 12 | 6 | 0 | -0.847669 | 7.445738  | -4.802667 |
| 13 | 8 | 0 | 0.795067  | 6.437980  | 0.334578  |
| 14 | 6 | 0 | 3.019041  | 7.742687  | -2.304358 |
| 15 | 6 | 0 | 5.062683  | 4.559980  | -6.429686 |
| 16 | 8 | 0 | 6.567417  | 2.933974  | -4.546174 |
| 17 | 8 | 0 | 6.126766  | 6.216201  | -1.082425 |
| 18 | 8 | 0 | 7.192191  | 3.844040  | -1.979071 |
| 19 | 8 | 0 | -3.855951 | 5.250449  | -4.929127 |
| 20 | 6 | 0 | 2.570748  | 7.174326  | -1.093533 |
| 21 | 6 | 0 | 0.171454  | 5.191865  | -7.746201 |
| 22 | 6 | 0 | 0.267588  | 7.553048  | -1.771427 |
| 23 | 6 | 0 | 3.677115  | 4.011788  | -6.690321 |
| 24 | 6 | 0 | 2.224547  | 2.057776  | -6.996593 |
| 25 | 6 | 0 | 1.320611  | 4.316976  | -7.291144 |
| 26 | 6 | 0 | 3.493802  | 2.614596  | -6.729559 |
| 27 | 6 | 0 | 4.737247  | 6.148759  | -4.453768 |
| 28 | 6 | 0 | -2.614329 | 5.790972  | -5.194147 |
| 29 | 6 | 0 | 2.577148  | 4.835559  | -6.959181 |
| 30 | 6 | 0 | -0.589498 | 5.771890  | -6.575785 |
| 31 | 6 | 0 | -0.102426 | 6.850294  | -5.825934 |
| 32 | 6 | 0 | -2.123347 | 6.919353  | -4.515792 |
| 33 | 6 | 0 | 2.067728  | 8.179279  | -3.233180 |
| 34 | 6 | 0 | 5.256411  | 4.960503  | -4.981268 |
| 35 | 6 | 0 | -1.845955 | 5.232916  | -6.234505 |
| 36 | 6 | 0 | 1.145875  | 2.918694  | -7.267820 |
| 37 | 6 | 0 | 5.030144  | 6.571534  | -3.151841 |
| 38 | 6 | 0 | 6.041534  | 4.142081  | -4.144321 |
| 39 | 6 | 0 | 6.363998  | 4.538024  | -2.832860 |
| 40 | 6 | 0 | 5.857778  | 5.760868  | -2.351551 |
| 41 | 6 | 0 | 4.867713  | 9.063950  | -3.459638 |
| 42 | 6 | 0 | 0.626989  | 6.280971  | -8.723509 |
| 43 | 6 | 0 | 5.422666  | 5.707942  | -7.379216 |
| 44 | 6 | 0 | 0.185390  | 9.745724  | -4.882985 |
| 45 | 1 | 0 | -3.226862 | 3.883975  | -6.627517 |
| 46 | 1 | 0 | -0.802471 | 2.980054  | -7.653909 |
| 47 | 1 | 0 | -1.700679 | 7.492597  | -2.147679 |
| 48 | 1 | 0 | 4.344227  | 6.540364  | -0.435192 |
| 49 | 1 | 0 | 4.372580  | 0.841665  | -6.696447 |
| 50 | 1 | 0 | 5.015173  | 8.048476  | -1.579242 |
| 51 | 1 | 0 | -3.751460 | 7.094419  | -3.380993 |
| 52 | 1 | 0 | -1.197811 | 9.048049  | -3.403357 |
| 53 | 1 | 0 | 1.193229  | 0.363248  | -7.087873 |
| 54 | 1 | 0 | -0.184520 | 6.637983  | 0.533339  |
| 55 | 1 | 0 | 5.796013  | 3.720229  | -6.652279 |
| 56 | 1 | 0 | 6.162477  | 2.643172  | -5.438885 |
| 57 | 1 | 0 | 6.794125  | 5.619204  | -0.606926 |
| 58 | 1 | 0 | 7.412382  | 2.922601  | -2.339306 |
| 59 | 1 | 0 | -3.917462 | 5.001195  | -3.931089 |
| 60 | 1 | 0 | -0.549222 | 4.529039  | -8.321749 |
| 61 | 1 | 0 | 4.090365  | 6.768528  | -5.076485 |
| 62 | 1 | 0 | 2.711802  | 5.918000  | -6.935762 |
| 63 | 1 | 0 | 0.891032  | 7.243067  | -6.050615 |
| 64 | 1 | 0 | 2.413139  | 8.595670  | -4.181910 |
| 65 | 1 | 0 | 5.958010  | 9.156024  | -3.552244 |
| 66 | 1 | 0 | 4.464868  | 8.977296  | -4.473929 |
| 67 | 1 | 0 | 4.492235  | 10.001041 | -3.030420 |
| 68 | 1 | 0 | 1.141896  | 5.841629  | -9.587046 |
| 69 | 1 | 0 | -0.233424 | 6.847525  | -9.102150 |
| 70 | 1 | 0 | 1.312482  | 7.000464  | -8.264826 |
| 71 | 1 | 0 | 4.782628  | 6.585324  | -7.242276 |
| 72 | 1 | 0 | 6.458752  | 6.034073  | -7.222891 |
| 73 | 1 | 0 | 5.327843  | 5.392562  | -8.426019 |
| 74 | 1 | 0 | 0.530849  | 10.595718 | -4.281732 |
| 75 | 1 | 0 | 1.015437  | 9.433128  | -5.524651 |
| 76 | 1 | 0 | -0.613412 | 10.110328 | -5.542380 |
| 77 | 6 | 0 | 4.610116  | 0.191342  | 6.936910  |
| 78 | 8 | 0 | -0.347774 | 4.337051  | 7.160216  |
| 79 | 8 | 0 | 0.604137  | 6.211952  | 5.258622  |
| 80 | 6 | 0 | 5.038368  | -1.297147 | 5.047313  |
| 81 | 8 | 0 | 3.285578  | -1.788197 | 6.634543  |

|     |   |   |           |           |           |
|-----|---|---|-----------|-----------|-----------|
| 82  | 8 | 0 | 6.767942  | -0.935450 | 3.525775  |
| 83  | 8 | 0 | 4.256759  | 7.061482  | 2.186389  |
| 84  | 6 | 0 | 7.756684  | 1.397725  | 5.058632  |
| 85  | 8 | 0 | 1.088667  | -0.098740 | 8.174069  |
| 86  | 6 | 0 | 3.794893  | 0.535377  | 8.165701  |
| 87  | 8 | 0 | 1.441576  | 7.096069  | 2.776747  |
| 88  | 6 | 0 | 2.744493  | 1.584169  | 7.862053  |
| 89  | 8 | 0 | 4.653030  | -2.426667 | 4.354656  |
| 90  | 6 | 0 | 6.503216  | 0.626349  | 5.422496  |
| 91  | 6 | 0 | 6.157355  | 6.129276  | 3.985973  |
| 92  | 8 | 0 | 6.294952  | 5.304426  | 1.177029  |
| 93  | 8 | 0 | 8.235692  | 1.096251  | 2.327953  |
| 94  | 8 | 0 | 7.394617  | 2.886270  | 0.417954  |
| 95  | 8 | 0 | -0.921373 | 1.635593  | 7.553097  |
| 96  | 6 | 0 | 6.130365  | -0.498643 | 4.666334  |
| 97  | 6 | 0 | 2.350574  | 5.376081  | 7.289147  |
| 98  | 6 | 0 | 4.298794  | -0.974274 | 6.203317  |
| 99  | 6 | 0 | 4.685526  | 6.135524  | 4.330632  |
| 100 | 6 | 0 | 2.378388  | 6.607870  | 3.662764  |
| 101 | 6 | 0 | 2.849564  | 5.742812  | 5.909374  |
| 102 | 6 | 0 | 3.757001  | 6.604314  | 3.380596  |
| 103 | 6 | 0 | 6.911087  | 3.738711  | 4.472491  |
| 104 | 6 | 0 | 0.369527  | 2.134230  | 7.589151  |
| 105 | 6 | 0 | 4.206459  | 5.701355  | 5.571779  |
| 106 | 6 | 0 | 2.052859  | 3.896220  | 7.407645  |
| 107 | 6 | 0 | 3.046241  | 2.930133  | 7.618271  |
| 108 | 6 | 0 | 1.387835  | 1.198152  | 7.869077  |
| 109 | 6 | 0 | 5.700532  | 0.965997  | 6.521415  |
| 110 | 6 | 0 | 6.583555  | 4.742427  | 3.551858  |
| 111 | 6 | 0 | 0.708879  | 3.475289  | 7.361065  |
| 112 | 6 | 0 | 1.933556  | 6.179624  | 4.929425  |
| 113 | 6 | 0 | 7.421762  | 2.498369  | 4.074067  |
| 114 | 6 | 0 | 6.680065  | 4.446943  | 2.179290  |
| 115 | 6 | 0 | 7.211643  | 3.219086  | 1.741947  |
| 116 | 6 | 0 | 7.622825  | 2.272782  | 2.697867  |
| 117 | 6 | 0 | 8.505224  | 1.924753  | 6.286471  |
| 118 | 6 | 0 | 3.291304  | 5.852972  | 8.401174  |
| 119 | 6 | 0 | 7.028638  | 6.671850  | 5.123353  |
| 120 | 6 | 0 | 4.676831  | 0.957520  | 9.346961  |
| 121 | 1 | 0 | -0.018096 | 5.230811  | 6.792783  |
| 122 | 1 | 0 | 0.033242  | 6.465673  | 4.453105  |
| 123 | 1 | 0 | 3.293714  | -2.671293 | 6.117927  |
| 124 | 1 | 0 | 7.411081  | -0.233304 | 3.149502  |
| 125 | 1 | 0 | 3.514209  | 7.383095  | 1.563556  |
| 126 | 1 | 0 | 8.462002  | 0.677758  | 4.543946  |
| 127 | 1 | 0 | 0.107756  | -0.279095 | 8.039172  |
| 128 | 1 | 0 | 3.254096  | -0.411010 | 8.479481  |
| 129 | 1 | 0 | 1.573028  | 6.681409  | 1.841820  |
| 130 | 1 | 0 | 5.322952  | -2.639753 | 3.617624  |
| 131 | 1 | 0 | 6.308687  | 6.829231  | 3.109067  |
| 132 | 1 | 0 | 5.647860  | 6.016286  | 1.521268  |
| 133 | 1 | 0 | 8.369470  | 1.052777  | 1.317458  |
| 134 | 1 | 0 | 6.978404  | 3.592266  | -0.191326 |
| 135 | 1 | 0 | -1.586871 | 2.386681  | 7.683201  |
| 136 | 1 | 0 | 1.372720  | 5.934083  | 7.439404  |
| 137 | 1 | 0 | 6.772088  | 3.933129  | 5.537418  |
| 138 | 1 | 0 | 4.920996  | 5.330500  | 6.309751  |
| 139 | 1 | 0 | 4.091919  | 3.240189  | 7.605906  |
| 140 | 1 | 0 | 5.949127  | 1.862998  | 7.092171  |
| 141 | 1 | 0 | 8.766850  | 1.103836  | 6.966096  |
| 142 | 1 | 0 | 9.438348  | 2.419806  | 5.988848  |
| 143 | 1 | 0 | 7.919653  | 2.650279  | 6.860580  |
| 144 | 1 | 0 | 4.268318  | 5.360466  | 8.366896  |
| 145 | 1 | 0 | 2.860059  | 5.646050  | 9.389021  |
| 146 | 1 | 0 | 3.463238  | 6.934126  | 8.332643  |
| 147 | 1 | 0 | 6.956684  | 6.072336  | 6.036398  |
| 148 | 1 | 0 | 6.734049  | 7.696991  | 5.381773  |
| 149 | 1 | 0 | 8.085446  | 6.693577  | 4.829106  |
| 150 | 1 | 0 | 5.420683  | 0.184611  | 9.574249  |
| 151 | 1 | 0 | 4.067618  | 1.105348  | 10.247601 |
| 152 | 1 | 0 | 5.214577  | 1.891758  | 9.161641  |
| 153 | 6 | 0 | 4.575234  | -4.610925 | -5.178635 |
| 154 | 8 | 0 | 3.854297  | -8.290791 | 0.112271  |
| 155 | 8 | 0 | 5.014163  | -6.550903 | 1.823924  |
| 156 | 6 | 0 | 3.623218  | -2.390625 | -5.555513 |
| 157 | 8 | 0 | 2.247352  | -4.387702 | -5.631668 |
| 158 | 8 | 0 | 4.929870  | -0.465493 | -5.538058 |
| 159 | 8 | 0 | 7.815205  | -2.720808 | 2.209302  |

|     |   |   |           |           |           |
|-----|---|---|-----------|-----------|-----------|
| 160 | 6 | 0 | 7.395868  | -1.989257 | -4.986669 |
| 161 | 8 | 0 | 1.805041  | -6.846047 | -3.944268 |
| 162 | 6 | 0 | 4.374385  | -6.110206 | -5.126022 |
| 163 | 8 | 0 | 5.773157  | -4.309041 | 3.178121  |
| 164 | 6 | 0 | 4.235389  | -6.601359 | -3.700032 |
| 165 | 8 | 0 | 2.509329  | -1.634290 | -5.836597 |
| 166 | 6 | 0 | 6.027278  | -2.630302 | -5.119527 |
| 167 | 6 | 0 | 9.017080  | -3.086647 | -0.264457 |
| 168 | 8 | 0 | 7.824099  | -0.496649 | 0.498171  |
| 169 | 8 | 0 | 6.848483  | 0.595330  | -4.026460 |
| 170 | 8 | 0 | 6.913513  | 1.291923  | -1.421165 |
| 171 | 8 | 0 | 1.632388  | -7.972213 | -1.404137 |
| 172 | 6 | 0 | 4.904194  | -1.827708 | -5.393436 |
| 173 | 6 | 0 | 6.406842  | -7.460087 | -0.633632 |
| 174 | 6 | 0 | 3.463599  | -3.786519 | -5.458709 |
| 175 | 6 | 0 | 8.005548  | -4.078920 | 0.266979  |
| 176 | 6 | 0 | 6.359796  | -4.655582 | 1.981279  |
| 177 | 6 | 0 | 6.698735  | -6.146505 | 0.064557  |
| 178 | 6 | 0 | 7.381220  | -3.816914 | 1.503248  |
| 179 | 6 | 0 | 8.187283  | -2.494713 | -2.601346 |
| 180 | 6 | 0 | 2.813027  | -7.542090 | -1.938908 |
| 181 | 6 | 0 | 7.651415  | -5.242046 | -0.423682 |
| 182 | 6 | 0 | 5.231214  | -7.296140 | -1.571933 |
| 183 | 6 | 0 | 5.343008  | -6.748026 | -2.854031 |
| 184 | 6 | 0 | 2.960757  | -6.973105 | -3.224428 |
| 185 | 6 | 0 | 5.827889  | -4.012588 | -5.001961 |
| 186 | 6 | 0 | 8.339298  | -2.155429 | -1.250144 |
| 187 | 6 | 0 | 3.957241  | -7.706141 | -1.140420 |
| 188 | 6 | 0 | 6.023913  | -5.817988 | 1.256024  |
| 189 | 6 | 0 | 7.636572  | -1.612741 | -3.538619 |
| 190 | 6 | 0 | 7.853541  | -0.907173 | -0.813834 |
| 191 | 6 | 0 | 7.349675  | 0.028535  | -1.736904 |
| 192 | 6 | 0 | 7.268372  | -0.329071 | -3.095115 |
| 193 | 6 | 0 | 8.516465  | -2.854368 | -5.568194 |
| 194 | 6 | 0 | 7.631169  | -8.050817 | -1.338191 |
| 195 | 6 | 0 | 10.254917 | -3.766638 | -0.855437 |
| 196 | 6 | 0 | 5.469641  | -6.870352 | -5.882074 |
| 197 | 1 | 0 | 2.881459  | -8.377881 | 0.367038  |
| 198 | 1 | 0 | 4.755450  | -7.375541 | 1.253409  |
| 199 | 1 | 0 | 1.519385  | -3.696211 | -5.845168 |
| 200 | 1 | 0 | 5.775592  | -0.047769 | -5.127624 |
| 201 | 1 | 0 | 7.337832  | -2.633499 | 3.105769  |
| 202 | 1 | 0 | 7.386461  | -1.033113 | -5.591406 |
| 203 | 1 | 0 | 1.910831  | -6.157453 | -4.681512 |
| 204 | 1 | 0 | 3.401190  | -6.335931 | -5.663261 |
| 205 | 1 | 0 | 4.908035  | -4.836849 | 3.323666  |
| 206 | 1 | 0 | 2.768842  | -0.648601 | -5.928771 |
| 207 | 1 | 0 | 9.383364  | -2.464079 | 0.606721  |
| 208 | 1 | 0 | 7.928627  | -1.283151 | 1.145058  |
| 209 | 1 | 0 | 6.415793  | 1.405269  | -3.568822 |
| 210 | 1 | 0 | 6.789394  | 1.391343  | -0.411993 |
| 211 | 1 | 0 | 0.849441  | -7.383819 | -1.761929 |
| 212 | 1 | 0 | 6.111713  | -8.207337 | 0.164584  |
| 213 | 1 | 0 | 8.514764  | -3.480521 | -2.936691 |
| 214 | 1 | 0 | 8.146927  | -5.459847 | -1.372474 |
| 215 | 1 | 0 | 6.324533  | -6.435245 | -3.210561 |
| 216 | 1 | 0 | 6.685818  | -4.650784 | -4.782369 |
| 217 | 1 | 0 | 8.327590  | -3.075504 | -6.626707 |
| 218 | 1 | 0 | 9.481199  | -2.334864 | -5.505371 |
| 219 | 1 | 0 | 8.625917  | -3.812523 | -5.049799 |
| 220 | 1 | 0 | 7.992696  | -7.423037 | -2.158879 |
| 221 | 1 | 0 | 8.461144  | -8.190549 | -0.634738 |
| 222 | 1 | 0 | 7.390251  | -9.033503 | -1.765851 |
| 223 | 1 | 0 | 10.019796 | -4.414524 | -1.706109 |
| 224 | 1 | 0 | 10.980733 | -3.020764 | -1.204134 |
| 225 | 1 | 0 | 10.754233 | -4.387417 | -0.100260 |
| 226 | 1 | 0 | 6.461406  | -6.735064 | -5.439988 |
| 227 | 1 | 0 | 5.260454  | -7.947943 | -5.886240 |
| 228 | 1 | 0 | 5.525283  | -6.538079 | -6.926063 |
| 229 | 6 | 0 | -5.227114 | -0.021825 | -6.698432 |
| 230 | 8 | 0 | -0.067260 | -3.357865 | -5.070637 |
| 231 | 8 | 0 | -1.134379 | -5.479045 | -3.570741 |
| 232 | 6 | 0 | -5.984871 | 1.746210  | -5.178370 |
| 233 | 8 | 0 | -4.024083 | 2.102179  | -6.402787 |
| 234 | 8 | 0 | -7.960536 | 1.512741  | -3.908086 |
| 235 | 8 | 0 | -5.376786 | -6.678093 | -1.486745 |
| 236 | 6 | 0 | -8.509732 | -1.116528 | -5.002334 |
| 237 | 8 | 0 | -1.777354 | 0.651305  | -7.004707 |



|     |   |   |            |           |           |
|-----|---|---|------------|-----------|-----------|
| 238 | 6 | 0 | -4.229341  | -0.501397 | -7.733861 |
| 239 | 8 | 0 | -2.738233  | -6.636867 | -1.273990 |
| 240 | 6 | 0 | -3.139915  | -1.312672 | -7.063671 |
| 241 | 8 | 0 | -5.847852  | 2.980996  | -4.571743 |
| 242 | 6 | 0 | -7.276573  | -0.322285 | -5.382808 |
| 243 | 6 | 0 | -6.853199  | -5.751645 | -3.675719 |
| 244 | 8 | 0 | -7.485995  | -4.965611 | -0.926297 |
| 245 | 8 | 0 | -9.009761  | -0.649375 | -2.293126 |
| 246 | 8 | 0 | -8.519151  | -2.491714 | -0.293826 |
| 247 | 8 | 0 | 0.218751   | -0.674235 | -5.722899 |
| 248 | 6 | 0 | -7.089668  | 0.954344  | -4.815205 |
| 249 | 6 | 0 | -2.368233  | -4.918543 | -5.970154 |
| 250 | 6 | 0 | -5.058769  | 1.248872  | -6.115349 |
| 251 | 6 | 0 | -5.340296  | -5.722669 | -3.672021 |
| 252 | 6 | 0 | -3.240537  | -6.119611 | -2.460279 |
| 253 | 6 | 0 | -3.185881  | -5.256466 | -4.742654 |
| 254 | 6 | 0 | -4.648799  | -6.167946 | -2.532967 |
| 255 | 6 | 0 | -7.629590  | -3.394276 | -4.271110 |
| 256 | 6 | 0 | -0.911676  | -1.389403 | -6.040062 |
| 257 | 6 | 0 | -4.583482  | -5.274272 | -4.762349 |
| 258 | 6 | 0 | -2.265257  | -3.423041 | -6.171739 |
| 259 | 6 | 0 | -3.276821  | -2.679468 | -6.790933 |
| 260 | 6 | 0 | -1.938076  | -0.680760 | -6.694103 |
| 261 | 6 | 0 | -6.328899  | -0.790597 | -6.300329 |
| 262 | 6 | 0 | -7.387373  | -4.381631 | -3.310021 |
| 263 | 6 | 0 | -1.096474  | -2.755506 | -5.758369 |
| 264 | 6 | 0 | -2.511184  | -5.626404 | -3.556534 |
| 265 | 6 | 0 | -8.179925  | -2.148988 | -3.945766 |
| 266 | 6 | 0 | -7.665742  | -4.082957 | -1.961054 |
| 267 | 6 | 0 | -8.194679  | -2.830490 | -1.593592 |
| 268 | 6 | 0 | -8.458833  | -1.871972 | -2.591629 |
| 269 | 6 | 0 | -9.196905  | -1.732927 | -6.225045 |
| 270 | 6 | 0 | -2.891567  | -5.631572 | -7.222247 |
| 271 | 6 | 0 | -7.427570  | -6.283488 | -4.991296 |
| 272 | 6 | 0 | -4.895634  | -1.254457 | -8.888504 |
| 273 | 1 | 0 | -0.375356  | -4.234159 | -4.628010 |
| 274 | 1 | 0 | -0.703793  | -5.847795 | -2.739337 |
| 275 | 1 | 0 | -3.226354  | 1.597462  | -6.810640 |
| 276 | 1 | 0 | -8.489456  | 0.788540  | -3.417226 |
| 277 | 1 | 0 | -4.762863  | -6.952339 | -0.703464 |
| 278 | 1 | 0 | -9.257463  | -0.395867 | -4.547858 |
| 279 | 1 | 0 | -0.929927  | 1.026545  | -6.570804 |
| 280 | 1 | 0 | -3.741424  | 0.412659  | -8.190324 |
| 281 | 1 | 0 | -1.741608  | -6.480554 | -1.188988 |
| 282 | 1 | 0 | -5.230444  | 3.571439  | -5.112304 |
| 283 | 1 | 0 | -7.183542  | -6.474901 | -2.868323 |
| 284 | 1 | 0 | -6.909982  | -5.763100 | -1.218408 |
| 285 | 1 | 0 | -9.165675  | -0.545293 | -1.294641 |
| 286 | 1 | 0 | -8.249971  | -3.235890 | 0.336185  |
| 287 | 1 | 0 | 0.810145   | -1.217040 | -5.087780 |
| 288 | 1 | 0 | -1.320293  | -5.315421 | -5.795906 |
| 289 | 1 | 0 | -7.394585  | -3.607266 | -5.315719 |
| 290 | 1 | 0 | -5.103737  | -4.941256 | -5.661667 |
| 291 | 1 | 0 | -4.201436  | -3.183453 | -7.076979 |
| 292 | 1 | 0 | -6.458659  | -1.786342 | -6.728593 |
| 293 | 1 | 0 | -8.562348  | -2.454687 | -6.749113 |
| 294 | 1 | 0 | -9.475727  | -0.956405 | -6.948377 |
| 295 | 1 | 0 | -10.114650 | -2.258281 | -5.931054 |
| 296 | 1 | 0 | -2.897400  | -6.719321 | -7.074049 |
| 297 | 1 | 0 | -2.253251  | -5.418294 | -8.088602 |
| 298 | 1 | 0 | -3.911195  | -5.333789 | -7.485468 |
| 299 | 1 | 0 | -7.063530  | -7.300110 | -5.189080 |
| 300 | 1 | 0 | -7.153375  | -5.666818 | -5.853195 |
| 301 | 1 | 0 | -8.523186  | -6.325086 | -4.950975 |
| 302 | 1 | 0 | -4.153797  | -1.536872 | -9.646793 |
| 303 | 1 | 0 | -5.650000  | -0.627248 | -9.379982 |
| 304 | 1 | 0 | -5.394753  | -2.173251 | -8.563715 |
| 305 | 6 | 0 | -4.892294  | 5.247330  | 5.345606  |
| 306 | 8 | 0 | -2.817198  | 8.258592  | 0.010248  |
| 307 | 8 | 0 | -3.926979  | 6.339861  | -1.749479 |
| 308 | 6 | 0 | -4.141830  | 3.020944  | 6.035410  |
| 309 | 8 | 0 | -2.661622  | 4.929074  | 6.145909  |
| 310 | 8 | 0 | -5.566153  | 1.157831  | 5.956701  |
| 311 | 8 | 0 | -6.901192  | 2.659826  | -1.929042 |
| 312 | 6 | 0 | -7.803053  | 2.744986  | 4.968421  |
| 313 | 8 | 0 | -1.747835  | 7.022603  | 4.505082  |
| 314 | 6 | 0 | -4.575405  | 6.719316  | 5.198371  |
| 315 | 8 | 0 | -4.546309  | 3.945681  | -2.680981 |

|     |   |   |            |           |           |
|-----|---|---|------------|-----------|-----------|
| 316 | 6 | 0 | -4.097826  | 7.026316  | 3.794139  |
| 317 | 8 | 0 | -3.109724  | 2.285887  | 6.560709  |
| 318 | 6 | 0 | -6.432766  | 3.339423  | 5.226236  |
| 319 | 6 | 0 | -8.671964  | 3.718772  | 0.038919  |
| 320 | 8 | 0 | -8.268260  | 0.852983  | -0.389270 |
| 321 | 8 | 0 | -7.587800  | 0.048140  | 4.277318  |
| 322 | 8 | 0 | -7.796371  | -0.889504 | 1.657072  |
| 323 | 8 | 0 | -0.938909  | 7.773427  | 1.932592  |
| 324 | 6 | 0 | -5.410013  | 2.503527  | 5.716352  |
| 325 | 6 | 0 | -5.528396  | 7.739682  | 0.290685  |
| 326 | 6 | 0 | -3.887701  | 4.392139  | 5.835630  |
| 327 | 6 | 0 | -7.424384  | 4.460429  | -0.390140 |
| 328 | 6 | 0 | -5.408593  | 4.519044  | -1.780845 |
| 329 | 6 | 0 | -5.894471  | 6.375939  | -0.263511 |
| 330 | 6 | 0 | -6.603925  | 3.893684  | -1.379359 |
| 331 | 6 | 0 | -8.174861  | 3.180650  | 2.484885  |
| 332 | 6 | 0 | -2.260868  | 7.588061  | 2.276953  |
| 333 | 6 | 0 | -7.039579  | 5.688665  | 0.161483  |
| 334 | 6 | 0 | -4.573112  | 7.571509  | 1.453936  |
| 335 | 6 | 0 | -4.993803  | 7.177829  | 2.728966  |
| 336 | 6 | 0 | -2.719447  | 7.190424  | 3.546252  |
| 337 | 6 | 0 | -6.142728  | 4.696109  | 5.035124  |
| 338 | 6 | 0 | -8.330100  | 2.757801  | 1.158553  |
| 339 | 6 | 0 | -3.200809  | 7.812521  | 1.253003  |
| 340 | 6 | 0 | -5.070460  | 5.773893  | -1.234906 |
| 341 | 6 | 0 | -7.926752  | 2.284094  | 3.530458  |
| 342 | 6 | 0 | -8.171087  | 1.390274  | 0.874052  |
| 343 | 6 | 0 | -7.917273  | 0.457749  | 1.899285  |
| 344 | 6 | 0 | -7.808677  | 0.911201  | 3.227496  |
| 345 | 6 | 0 | -8.940017  | 3.691165  | 5.366433  |
| 346 | 6 | 0 | -6.747574  | 8.585525  | 0.669003  |
| 347 | 6 | 0 | -9.828438  | 4.649378  | 0.414040  |
| 348 | 6 | 0 | -5.742471  | 7.619655  | 5.615029  |
| 349 | 1 | 0 | -1.805536  | 8.411145  | -0.029990 |
| 350 | 1 | 0 | -3.485058  | 6.981640  | -1.087975 |
| 351 | 1 | 0 | -1.983525  | 4.190354  | 6.347198  |
| 352 | 1 | 0 | -6.406491  | 0.787457  | 5.506568  |
| 353 | 1 | 0 | -7.130537  | 2.748427  | -2.927116 |
| 354 | 1 | 0 | -7.905674  | 1.830454  | 5.630420  |
| 355 | 1 | 0 | -2.110952  | 6.482566  | 5.297035  |
| 356 | 1 | 0 | -3.723885  | 6.951100  | 5.910296  |
| 357 | 1 | 0 | -4.919482  | 3.043232  | -3.004771 |
| 358 | 1 | 0 | -3.261004  | 1.280390  | 6.434884  |
| 359 | 1 | 0 | -9.022855  | 3.109858  | -0.847292 |
| 360 | 1 | 0 | -7.873976  | 1.498168  | -1.086642 |
| 361 | 1 | 0 | -7.505173  | -0.909730 | 3.955643  |
| 362 | 1 | 0 | -7.847855  | -1.068868 | 0.647142  |
| 363 | 1 | 0 | -0.348810  | 7.788271  | 2.755259  |
| 364 | 1 | 0 | -4.991478  | 8.308184  | -0.526718 |
| 365 | 1 | 0 | -8.254397  | 4.244900  | 2.711523  |
| 366 | 1 | 0 | -7.661289  | 6.132320  | 0.940925  |
| 367 | 1 | 0 | -6.055057  | 6.988541  | 2.899489  |
| 368 | 1 | 0 | -6.921579  | 5.351029  | 4.641560  |
| 369 | 1 | 0 | -8.854115  | 3.983016  | 6.420643  |
| 370 | 1 | 0 | -8.954692  | 4.609414  | 4.770736  |
| 371 | 1 | 0 | -9.914189  | 3.202499  | 5.235453  |
| 372 | 1 | 0 | -7.417050  | 8.715723  | -0.190261 |
| 373 | 1 | 0 | -7.334419  | 8.144547  | 1.481434  |
| 374 | 1 | 0 | -6.435122  | 9.584617  | 1.000087  |
| 375 | 1 | 0 | -10.084286 | 5.313304  | -0.420794 |
| 376 | 1 | 0 | -10.726320 | 4.069154  | 0.663952  |
| 377 | 1 | 0 | -9.601023  | 5.279958  | 1.279797  |
| 378 | 1 | 0 | -6.628152  | 7.482720  | 4.986363  |
| 379 | 1 | 0 | -6.040919  | 7.414991  | 6.651110  |
| 380 | 1 | 0 | -5.459749  | 8.678150  | 5.553416  |
| 381 | 6 | 0 | -1.363831  | -8.278763 | 3.155228  |
| 382 | 8 | 0 | 2.282749   | -3.184908 | 4.684464  |
| 383 | 8 | 0 | 0.326285   | -1.039870 | 6.040684  |
| 384 | 6 | 0 | -2.403028  | -8.525648 | 0.940198  |
| 385 | 8 | 0 | -0.037593  | -8.892893 | 1.251594  |
| 386 | 8 | 0 | -4.723077  | -8.182234 | 0.624854  |
| 387 | 8 | 0 | -4.403115  | -0.962883 | 6.040942  |
| 388 | 6 | 0 | -5.163918  | -7.745428 | 3.461297  |
| 389 | 8 | 0 | 1.874767   | -7.203252 | 2.166087  |
| 390 | 6 | 0 | -0.116871  | -8.326091 | 4.013965  |
| 391 | 8 | 0 | -2.029692  | 0.292609  | 5.636029  |
| 392 | 6 | 0 | 0.483238   | -6.943737 | 4.179520  |
| 393 | 8 | 0 | -2.168261  | -8.844841 | -0.368544 |

|     |   |   |           |            |           |
|-----|---|---|-----------|------------|-----------|
| 394 | 6 | 0 | -3.782829 | -7.980104  | 2.883982  |
| 395 | 6 | 0 | -4.697492 | -3.686195  | 6.502412  |
| 396 | 8 | 0 | -6.096651 | -2.200485  | 4.339468  |
| 397 | 8 | 0 | -6.435410 | -6.077787  | 1.612075  |
| 398 | 8 | 0 | -6.843384 | -3.381003  | 2.012995  |
| 399 | 8 | 0 | 3.132628  | -4.848682  | 2.598823  |
| 400 | 6 | 0 | -3.655584 | -8.215169  | 1.500358  |
| 401 | 6 | 0 | 0.419647  | -3.938153  | 6.592781  |
| 402 | 6 | 0 | -1.269908 | -8.553967  | 1.779909  |
| 403 | 6 | 0 | -3.322119 | -3.070072  | 6.343918  |
| 404 | 6 | 0 | -1.993763 | -1.046947  | 5.952296  |
| 405 | 6 | 0 | -0.868932 | -3.177875  | 6.367470  |
| 406 | 6 | 0 | -3.233187 | -1.686906  | 6.095888  |
| 407 | 6 | 0 | -4.927434 | -5.667274  | 4.919365  |
| 408 | 6 | 0 | 2.123601  | -5.272770  | 3.447263  |
| 409 | 6 | 0 | -2.128019 | -3.791540  | 6.452211  |
| 410 | 6 | 0 | 0.749029  | -4.841244  | 5.422939  |
| 411 | 6 | 0 | 0.138253  | -6.086156  | 5.233587  |
| 412 | 6 | 0 | 1.464461  | -6.506691  | 3.269860  |
| 413 | 6 | 0 | -2.631353 | -7.990019  | 3.679021  |
| 414 | 6 | 0 | -5.141741 | -4.311197  | 5.196464  |
| 415 | 6 | 0 | 1.739714  | -4.430045  | 4.504192  |
| 416 | 6 | 0 | -0.808358 | -1.795261  | 6.105200  |
| 417 | 6 | 0 | -5.366919 | -6.273162  | 3.737630  |
| 418 | 6 | 0 | -5.798941 | -3.533651  | 4.223165  |
| 419 | 6 | 0 | -6.222362 | -4.103396  | 3.005315  |
| 420 | 6 | 0 | -6.013515 | -5.474982  | 2.773590  |
| 421 | 6 | 0 | -5.432489 | -8.624839  | 4.685204  |
| 422 | 6 | 0 | 0.399981  | -4.704267  | 7.919833  |
| 423 | 6 | 0 | -4.758405 | -4.655207  | 7.687109  |
| 424 | 6 | 0 | -0.364541 | -9.021396  | 5.356261  |
| 425 | 1 | 0 | 2.945068  | -2.944639  | 3.946708  |
| 426 | 1 | 0 | 1.181652  | -1.583978  | 6.173787  |
| 427 | 1 | 0 | -0.065850 | -8.845425  | 0.236086  |
| 428 | 1 | 0 | -5.556778 | -7.827720  | 1.098869  |
| 429 | 1 | 0 | -4.232507 | 0.000914   | 5.729256  |
| 430 | 1 | 0 | -5.926101 | -8.047689  | 2.675072  |
| 431 | 1 | 0 | 1.216123  | -7.964722  | 1.934822  |
| 432 | 1 | 0 | 0.644837  | -8.960832  | 3.466213  |
| 433 | 1 | 0 | -1.171337 | 0.762933   | 5.949247  |
| 434 | 1 | 0 | -2.889044 | -8.452953  | -0.972280 |
| 435 | 1 | 0 | -5.423261 | -2.851111  | 6.742365  |
| 436 | 1 | 0 | -5.562201 | -1.750672  | 5.091792  |
| 437 | 1 | 0 | -6.851025 | -5.396162  | 0.989970  |
| 438 | 1 | 0 | -6.793414 | -2.388211  | 2.230511  |
| 439 | 1 | 0 | 3.459128  | -5.650026  | 2.037534  |
| 440 | 1 | 0 | 1.255010  | -3.169998  | 6.676487  |
| 441 | 1 | 0 | -4.405591 | -6.279591  | 5.657441  |
| 442 | 1 | 0 | -2.178213 | -4.867993  | 6.623159  |
| 443 | 1 | 0 | -0.632278 | -6.404897  | 5.938904  |
| 444 | 1 | 0 | -2.723832 | -7.771621  | 4.743641  |
| 445 | 1 | 0 | -6.449505 | -8.465114  | 5.065148  |
| 446 | 1 | 0 | -5.334531 | -9.687937  | 4.430679  |
| 447 | 1 | 0 | -4.740094 | -8.424609  | 5.509397  |
| 448 | 1 | 0 | 0.248263  | -4.018907  | 8.763650  |
| 449 | 1 | 0 | -0.397280 | -5.452782  | 7.963696  |
| 450 | 1 | 0 | 1.350560  | -5.226198  | 8.085991  |
| 451 | 1 | 0 | -4.491744 | -4.141798  | 8.619966  |
| 452 | 1 | 0 | -5.771289 | -5.058935  | 7.809765  |
| 453 | 1 | 0 | -4.076073 | -5.503994  | 7.576247  |
| 454 | 1 | 0 | 0.563173  | -9.090479  | 5.937977  |
| 455 | 1 | 0 | -1.102426 | -8.499504  | 5.974050  |
| 456 | 1 | 0 | -0.734491 | -10.043270 | 5.200268  |
| 457 | 1 | 0 | -1.163640 | 1.319887   | -2.236150 |
| 458 | 1 | 0 | -1.589260 | -1.033369  | -2.932881 |
| 459 | 1 | 0 | 0.262846  | -2.693924  | -2.896378 |
| 460 | 1 | 0 | 5.704813  | -3.181587  | -2.282927 |
| 461 | 1 | 0 | 4.279697  | -4.299359  | -2.274700 |
| 462 | 1 | 0 | 5.054744  | -3.785079  | -0.735311 |
| 463 | 1 | 0 | 2.472622  | -3.256986  | -2.701825 |
| 464 | 1 | 0 | 4.649430  | -0.282840  | 2.441757  |
| 465 | 1 | 0 | 5.554128  | -0.228899  | 0.906474  |
| 466 | 1 | 0 | 3.971566  | 0.608815   | 1.055203  |
| 467 | 1 | 0 | 4.428579  | -2.454974  | 1.025622  |
| 468 | 1 | 0 | 1.850110  | -0.752930  | 1.002318  |
| 469 | 1 | 0 | 2.503720  | -3.800948  | 0.769560  |
| 470 | 1 | 0 | -1.772574 | -4.310217  | 1.755494  |
| 471 | 1 | 0 | -2.076851 | -5.011290  | 0.142089  |

|     |   |   |           |           |           |
|-----|---|---|-----------|-----------|-----------|
| 472 | 1 | 0 | 0.408922  | -5.172448 | 1.322873  |
| 473 | 1 | 0 | -0.635050 | -1.743892 | 1.746363  |
| 474 | 6 | 0 | -1.675524 | -2.844519 | 0.162555  |
| 475 | 6 | 0 | -0.460667 | -2.107226 | 0.717527  |
| 476 | 7 | 0 | 0.576366  | -3.145228 | 0.741214  |
| 477 | 8 | 0 | 4.401124  | -1.327317 | -0.979036 |
| 478 | 6 | 0 | 2.736300  | -2.327258 | -2.206064 |
| 479 | 6 | 0 | -0.350199 | 0.591661  | -2.233546 |
| 480 | 6 | 0 | 0.449441  | -5.080691 | -0.810033 |
| 481 | 8 | 0 | 1.366286  | -4.555143 | -1.433026 |
| 482 | 6 | 0 | 1.735522  | -1.267822 | -2.201858 |
| 483 | 8 | 0 | -0.185319 | -6.132927 | -1.168291 |
| 484 | 6 | 0 | 1.867722  | -2.908003 | 0.812098  |
| 485 | 6 | 0 | 2.464845  | -1.654155 | 0.951531  |
| 486 | 6 | 0 | 3.851123  | -1.528716 | 0.922148  |
| 487 | 7 | 0 | 3.917750  | -2.310514 | -1.668180 |
| 488 | 6 | 0 | 4.787923  | -3.480175 | -1.755898 |
| 489 | 6 | 0 | 0.935122  | 0.985141  | -1.847443 |
| 490 | 1 | 0 | -1.641098 | -2.843776 | -0.937366 |
| 491 | 6 | 0 | 0.017345  | -4.491652 | 0.547328  |
| 492 | 6 | 0 | -1.492475 | -4.268249 | 0.690323  |
| 493 | 6 | 0 | -0.589504 | -0.725964 | -2.622422 |
| 494 | 6 | 0 | 0.447826  | -1.655829 | -2.610367 |
| 495 | 6 | 0 | 1.978537  | 0.066323  | -1.827234 |
| 496 | 1 | 0 | -0.135369 | -1.257711 | 0.099092  |
| 497 | 1 | 0 | -2.619974 | -2.380336 | 0.475735  |
| 498 | 6 | 0 | 4.548467  | -0.279745 | 1.342748  |
| 499 | 1 | 0 | 1.121911  | 2.020945  | -1.555832 |
| 500 | 1 | 0 | 2.980135  | 0.357606  | -1.515591 |

### IN1a@CP<sub>6R</sub>-in

| Center Number | Atomic Number | Atomic Type | Coordinates (Angstroms) |          |           |
|---------------|---------------|-------------|-------------------------|----------|-----------|
|               |               |             | X                       | Y        | Z         |
| 1             | 6             | 0           | 0.872752                | 8.156681 | -2.825487 |
| 2             | 8             | 0           | -2.234584               | 4.377560 | -6.872314 |
| 3             | 8             | 0           | -0.032192               | 2.471601 | -7.461271 |
| 4             | 6             | 0           | 1.355286                | 7.033494 | -0.693194 |
| 5             | 8             | 0           | -0.870243               | 7.462453 | -1.222444 |
| 6             | 8             | 0           | 3.553258                | 6.600618 | 0.013899  |
| 7             | 8             | 0           | 4.604125                | 1.858640 | -6.470462 |
| 8             | 6             | 0           | 4.680500                | 7.816097 | -2.424081 |
| 9             | 8             | 0           | -2.682306               | 7.702127 | -3.371753 |
| 10            | 6             | 0           | -0.141048               | 8.709073 | -3.807275 |
| 11            | 8             | 0           | 2.126966                | 0.792237 | -6.983463 |
| 12            | 6             | 0           | -0.689612               | 7.574280 | -4.648559 |
| 13            | 8             | 0           | 0.946243                | 6.378382 | 0.445885  |
| 14            | 6             | 0           | 3.193540                | 7.713715 | -2.157304 |
| 15            | 6             | 0           | 5.148715                | 4.582542 | -6.356695 |
| 16            | 8             | 0           | 6.655963                | 2.899477 | -4.530171 |
| 17            | 8             | 0           | 6.283950                | 6.101466 | -0.982809 |
| 18            | 8             | 0           | 7.308937                | 3.735533 | -1.944105 |
| 19            | 8             | 0           | -3.755646               | 5.462451 | -4.827218 |
| 20            | 6             | 0           | 2.734913                | 7.119799 | -0.962724 |
| 21            | 6             | 0           | 0.269998                | 5.360102 | -7.641547 |
| 22            | 6             | 0           | 0.439581                | 7.567007 | -1.624769 |
| 23            | 6             | 0           | 3.747330                | 4.074507 | -6.614223 |
| 24            | 6             | 0           | 2.238276                | 2.164575 | -6.923376 |
| 25            | 6             | 0           | 1.397142                | 4.449741 | -7.200967 |
| 26            | 6             | 0           | 3.524042                | 2.683324 | -6.660502 |
| 27            | 6             | 0           | 4.868457                | 6.133915 | -4.343801 |
| 28            | 6             | 0           | -2.500667               | 5.977841 | -5.076787 |
| 29            | 6             | 0           | 2.669689                | 4.930386 | -6.872891 |
| 30            | 6             | 0           | -0.476527               | 5.935380 | -6.459615 |
| 31            | 6             | 0           | 0.039118                | 6.983513 | -5.685969 |
| 32            | 6             | 0           | -1.979555               | 7.076436 | -4.372689 |
| 33            | 6             | 0           | 2.250636                | 8.198418 | -3.070742 |
| 34            | 6             | 0           | 5.364830                | 4.950284 | -4.902635 |
| 35            | 6             | 0           | -1.746583               | 5.423202 | -6.129517 |
| 36            | 6             | 0           | 1.182723                | 3.056904 | -7.184920 |
| 37            | 6             | 0           | 5.179944                | 6.522634 | -3.035544 |
| 38            | 6             | 0           | 6.147420                | 4.103692 | -4.092154 |
| 39            | 6             | 0           | 6.485487                | 4.462684 | -2.774484 |
| 40            | 6             | 0           | 6.000870                | 5.681203 | -2.260257 |
| 41            | 6             | 0           | 5.069309                | 9.023885 | -3.282104 |

|     |   |   |           |           |           |
|-----|---|---|-----------|-----------|-----------|
| 42  | 6 | 0 | 0.751005  | 6.456404  | -8.598092 |
| 43  | 6 | 0 | 5.530651  | 5.739417  | -7.286369 |
| 44  | 6 | 0 | 0.400898  | 9.848641  | -4.674438 |
| 45  | 1 | 0 | -3.162771 | 4.119495  | -6.546729 |
| 46  | 1 | 0 | -0.763928 | 3.175150  | -7.568075 |
| 47  | 1 | 0 | -1.530926 | 7.575509  | -1.995328 |
| 48  | 1 | 0 | 4.496996  | 6.437982  | -0.323092 |
| 49  | 1 | 0 | 4.350407  | 0.885470  | -6.637395 |
| 50  | 1 | 0 | 5.195555  | 7.960597  | -1.426769 |
| 51  | 1 | 0 | -3.600273 | 7.269099  | -3.229607 |
| 52  | 1 | 0 | -0.992649 | 9.147991  | -3.206079 |
| 53  | 1 | 0 | 1.154453  | 0.503343  | -7.018585 |
| 54  | 1 | 0 | -0.025966 | 6.600984  | 0.658873  |
| 55  | 1 | 0 | 5.857832  | 3.728440  | -6.602303 |
| 56  | 1 | 0 | 6.230924  | 2.633356  | -5.421156 |
| 57  | 1 | 0 | 6.947277  | 5.485098  | -0.526618 |
| 58  | 1 | 0 | 7.508516  | 2.818645  | -2.325043 |
| 59  | 1 | 0 | -3.827419 | 5.192176  | -3.835023 |
| 60  | 1 | 0 | -0.465613 | 4.725131  | -8.229261 |
| 61  | 1 | 0 | 4.224775  | 6.777079  | -4.945913 |
| 62  | 1 | 0 | 2.835027  | 6.008660  | -6.844488 |
| 63  | 1 | 0 | 1.042546  | 7.354884  | -5.902448 |
| 64  | 1 | 0 | 2.603572  | 8.636077  | -4.007009 |
| 65  | 1 | 0 | 6.161332  | 9.096201  | -3.372055 |
| 66  | 1 | 0 | 4.665525  | 8.969918  | -4.298254 |
| 67  | 1 | 0 | 4.712793  | 9.958015  | -2.830581 |
| 68  | 1 | 0 | 1.257644  | 6.022253  | -9.469053 |
| 69  | 1 | 0 | -0.096526 | 7.048239  | -8.967452 |
| 70  | 1 | 0 | 1.450382  | 7.153098  | -8.125324 |
| 71  | 1 | 0 | 4.918029  | 6.631878  | -7.123273 |
| 72  | 1 | 0 | 6.577358  | 6.032878  | -7.135397 |
| 73  | 1 | 0 | 5.415396  | 5.449608  | -8.338491 |
| 74  | 1 | 0 | 0.770588  | 10.673790 | -4.053227 |
| 75  | 1 | 0 | 1.219520  | 9.532137  | -5.328666 |
| 76  | 1 | 0 | -0.391634 | 10.250570 | -5.319639 |
| 77  | 6 | 0 | 4.631246  | -0.069406 | 6.890385  |
| 78  | 8 | 0 | -0.226224 | 4.182951  | 7.248472  |
| 79  | 8 | 0 | 0.770147  | 6.057162  | 5.364186  |
| 80  | 6 | 0 | 5.009701  | -1.506077 | 4.948804  |
| 81  | 8 | 0 | 3.248412  | -1.997423 | 6.524169  |
| 82  | 8 | 0 | 6.754009  | -1.147305 | 3.440110  |
| 83  | 8 | 0 | 4.437163  | 6.889146  | 2.305481  |
| 84  | 6 | 0 | 7.810277  | 1.101486  | 5.045864  |
| 85  | 8 | 0 | 1.107475  | -0.308839 | 8.151362  |
| 86  | 6 | 0 | 3.828202  | 0.257305  | 8.131736  |
| 87  | 8 | 0 | 1.625930  | 6.967682  | 2.895983  |
| 88  | 6 | 0 | 2.801772  | 1.338899  | 7.862791  |
| 89  | 8 | 0 | 4.579173  | -2.596991 | 4.224411  |
| 90  | 6 | 0 | 6.534050  | 0.357833  | 5.386951  |
| 91  | 6 | 0 | 6.321298  | 5.894027  | 4.091340  |
| 92  | 8 | 0 | 6.488212  | 5.153521  | 1.263291  |
| 93  | 8 | 0 | 8.327194  | 0.871471  | 2.315585  |
| 94  | 8 | 0 | 7.567278  | 2.745625  | 0.444536  |
| 95  | 8 | 0 | -0.864117 | 1.488326  | 7.581122  |
| 96  | 6 | 0 | 6.126103  | -0.730378 | 4.594868  |
| 97  | 6 | 0 | 2.498550  | 5.150886  | 7.378543  |
| 98  | 6 | 0 | 4.282712  | -1.198536 | 6.118420  |
| 99  | 6 | 0 | 4.849449  | 5.918342  | 4.434125  |
| 100 | 6 | 0 | 2.551760  | 6.445080  | 3.774623  |
| 101 | 6 | 0 | 3.005684  | 5.532774  | 6.005815  |
| 102 | 6 | 0 | 3.930281  | 6.420323  | 3.492398  |
| 103 | 6 | 0 | 7.017700  | 3.474048  | 4.516854  |
| 104 | 6 | 0 | 0.438984  | 1.953301  | 7.621006  |
| 105 | 6 | 0 | 4.361375  | 5.471307  | 5.667508  |
| 106 | 6 | 0 | 2.164378  | 3.676878  | 7.466776  |
| 107 | 6 | 0 | 3.135186  | 2.681971  | 7.647499  |
| 108 | 6 | 0 | 1.435801  | 0.986167  | 7.871836  |
| 109 | 6 | 0 | 5.744312  | 0.685468  | 6.498264  |
| 110 | 6 | 0 | 6.725998  | 4.512043  | 3.622436  |
| 111 | 6 | 0 | 0.810323  | 3.290299  | 7.421032  |
| 112 | 6 | 0 | 2.098170  | 6.004094  | 5.033578  |
| 113 | 6 | 0 | 7.512493  | 2.237091  | 4.088978  |
| 114 | 6 | 0 | 6.841838  | 4.257163  | 2.243379  |
| 115 | 6 | 0 | 7.359690  | 3.034171  | 1.777475  |
| 116 | 6 | 0 | 7.734002  | 2.050275  | 2.709856  |
| 117 | 6 | 0 | 8.570508  | 1.576919  | 6.287680  |
| 118 | 6 | 0 | 3.451377  | 5.580833  | 8.499406  |
| 119 | 6 | 0 | 7.201112  | 6.390783  | 5.243096  |

|     |   |   |           |           |           |
|-----|---|---|-----------|-----------|-----------|
| 120 | 6 | 0 | 4.722241  | 0.624132  | 9.322397  |
| 121 | 1 | 0 | 0.122766  | 5.074157  | 6.895006  |
| 122 | 1 | 0 | 0.203826  | 6.335387  | 4.563853  |
| 123 | 1 | 0 | 3.223496  | -2.858438 | 5.966035  |
| 124 | 1 | 0 | 7.415875  | -0.453827 | 3.090200  |
| 125 | 1 | 0 | 3.699884  | 7.242980  | 1.694353  |
| 126 | 1 | 0 | 8.495880  | 0.373908  | 4.515616  |
| 127 | 1 | 0 | 0.124080  | -0.466934 | 8.004463  |
| 128 | 1 | 0 | 3.266323  | -0.685346 | 8.418915  |
| 129 | 1 | 0 | 1.742413  | 6.556943  | 1.958090  |
| 130 | 1 | 0 | 5.209601  | -2.785453 | 3.448582  |
| 131 | 1 | 0 | 6.485755  | 6.613973  | 3.233067  |
| 132 | 1 | 0 | 5.843792  | 5.861359  | 1.620690  |
| 133 | 1 | 0 | 8.485457  | 0.857644  | 1.310403  |
| 134 | 1 | 0 | 7.153059  | 3.468759  | -0.144523 |
| 135 | 1 | 0 | -1.508950 | 2.250510  | 7.742567  |
| 136 | 1 | 0 | 1.535105  | 5.730083  | 7.540915  |
| 137 | 1 | 0 | 6.861840  | 3.637493  | 5.584822  |
| 138 | 1 | 0 | 5.068435  | 5.074140  | 6.399077  |
| 139 | 1 | 0 | 4.188118  | 2.966019  | 7.633075  |
| 140 | 1 | 0 | 6.020766  | 1.554415  | 7.098334  |
| 141 | 1 | 0 | 8.804492  | 0.732370  | 6.948322  |
| 142 | 1 | 0 | 9.519082  | 2.050350  | 6.004744  |
| 143 | 1 | 0 | 8.004689  | 2.305517  | 6.877477  |
| 144 | 1 | 0 | 4.414674  | 5.062708  | 8.455440  |
| 145 | 1 | 0 | 3.014354  | 5.365389  | 9.482958  |
| 146 | 1 | 0 | 3.651933  | 6.658077  | 8.452656  |
| 147 | 1 | 0 | 7.120347  | 5.766407  | 6.138644  |
| 148 | 1 | 0 | 6.922221  | 7.412412  | 5.531081  |
| 149 | 1 | 0 | 8.258075  | 6.404694  | 4.949082  |
| 150 | 1 | 0 | 5.450040  | -0.171133 | 9.522882  |
| 151 | 1 | 0 | 4.118776  | 0.756766  | 10.229176 |
| 152 | 1 | 0 | 5.278992  | 1.552054  | 9.163751  |
| 153 | 6 | 0 | 4.427345  | -4.564870 | -5.268896 |
| 154 | 8 | 0 | 3.690508  | -8.371361 | -0.078202 |
| 155 | 8 | 0 | 4.904278  | -6.699646 | 1.653918  |
| 156 | 6 | 0 | 3.525659  | -2.306689 | -5.522410 |
| 157 | 8 | 0 | 2.094621  | -4.260467 | -5.637210 |
| 158 | 8 | 0 | 4.877992  | -0.417374 | -5.460481 |
| 159 | 8 | 0 | 7.766318  | -2.922936 | 2.093652  |
| 160 | 6 | 0 | 7.322891  | -2.028268 | -5.056441 |
| 161 | 8 | 0 | 1.619918  | -6.804059 | -4.074806 |
| 162 | 6 | 0 | 4.185622  | -6.059192 | -5.261610 |
| 163 | 8 | 0 | 5.688761  | -4.474734 | 3.030281  |
| 164 | 6 | 0 | 4.055177  | -6.588463 | -3.848631 |
| 165 | 8 | 0 | 2.421597  | -1.511071 | -5.719270 |
| 166 | 6 | 0 | 5.933984  | -2.626374 | -5.176652 |
| 167 | 6 | 0 | 8.967694  | -3.276785 | -0.380914 |
| 168 | 8 | 0 | 7.881241  | -0.664099 | 0.448405  |
| 169 | 8 | 0 | 6.888945  | 0.550013  | -4.043916 |
| 170 | 8 | 0 | 6.980888  | 1.186653  | -1.418518 |
| 171 | 8 | 0 | 1.455486  | -7.963987 | -1.555101 |
| 172 | 6 | 0 | 4.825843  | -1.783559 | -5.380827 |
| 173 | 6 | 0 | 6.249236  | -7.574074 | -0.836677 |
| 174 | 6 | 0 | 3.330702  | -3.700922 | -5.483922 |
| 175 | 6 | 0 | 7.930449  | -4.252620 | 0.129479  |
| 176 | 6 | 0 | 6.270969  | -4.821936 | 1.834706  |
| 177 | 6 | 0 | 6.578434  | -6.285017 | -0.110443 |
| 178 | 6 | 0 | 7.310003  | -3.997000 | 1.368564  |
| 179 | 6 | 0 | 8.123834  | -2.612147 | -2.692493 |
| 180 | 6 | 0 | 2.637181  | -7.549584 | -2.094149 |
| 181 | 6 | 0 | 7.549919  | -5.393670 | -0.583602 |
| 182 | 6 | 0 | 5.064503  | -7.359479 | -1.753612 |
| 183 | 6 | 0 | 5.170461  | -6.776869 | -3.020448 |
| 184 | 6 | 0 | 2.781363  | -6.955689 | -3.369193 |
| 185 | 6 | 0 | 5.700227  | -4.006917 | -5.109403 |
| 186 | 6 | 0 | 8.309597  | -2.303282 | -1.338722 |
| 187 | 6 | 0 | 3.788258  | -7.756643 | -1.315084 |
| 188 | 6 | 0 | 5.916720  | -5.968416 | 1.092181  |
| 189 | 6 | 0 | 7.595592  | -1.691027 | -3.604327 |
| 190 | 6 | 0 | 7.874999  | -1.047592 | -0.870331 |
| 191 | 6 | 0 | 7.386855  | -0.077706 | -1.766769 |
| 192 | 6 | 0 | 7.282966  | -0.402997 | -3.131736 |
| 193 | 6 | 0 | 8.409909  | -2.910337 | -5.673828 |
| 194 | 6 | 0 | 7.449117  | -8.175149 | -1.573473 |
| 195 | 6 | 0 | 10.183707 | -3.972861 | -0.997318 |
| 196 | 6 | 0 | 5.247031  | -6.825937 | -6.057540 |
| 197 | 1 | 0 | 2.719856  | -8.438862 | 0.193547  |

|     |   |   |           |           |           |
|-----|---|---|-----------|-----------|-----------|
| 198 | 1 | 0 | 4.644829  | -7.520904 | 1.082358  |
| 199 | 1 | 0 | 1.382929  | -3.547494 | -5.844293 |
| 200 | 1 | 0 | 5.783839  | -0.042054 | -5.146192 |
| 201 | 1 | 0 | 7.279591  | -2.835385 | 2.988239  |
| 202 | 1 | 0 | 7.330272  | -1.059123 | -5.640513 |
| 203 | 1 | 0 | 1.719414  | -6.096413 | -4.791806 |
| 204 | 1 | 0 | 3.198103  | -6.240175 | -5.789630 |
| 205 | 1 | 0 | 4.811592  | -4.993311 | 3.175405  |
| 206 | 1 | 0 | 2.706429  | -0.539459 | -5.870553 |
| 207 | 1 | 0 | 9.354721  | -2.687467 | 0.504575  |
| 208 | 1 | 0 | 7.973919  | -1.469499 | 1.079565  |
| 209 | 1 | 0 | 6.510599  | 1.379927  | -3.573113 |
| 210 | 1 | 0 | 6.955412  | 1.295688  | -0.399174 |
| 211 | 1 | 0 | 0.676066  | -7.355868 | -1.901143 |
| 212 | 1 | 0 | 5.947566  | -8.334248 | -0.052871 |
| 213 | 1 | 0 | 8.408184  | -3.603581 | -3.050542 |
| 214 | 1 | 0 | 8.040562  | -5.605276 | -1.535936 |
| 215 | 1 | 0 | 6.153080  | -6.472481 | -3.380585 |
| 216 | 1 | 0 | 6.547216  | -4.676226 | -4.943752 |
| 217 | 1 | 0 | 8.199561  | -3.104575 | -6.733610 |
| 218 | 1 | 0 | 9.389406  | -2.417987 | -5.616028 |
| 219 | 1 | 0 | 8.503070  | -3.881527 | -5.176646 |
| 220 | 1 | 0 | 7.814120  | -7.535656 | -2.383313 |
| 221 | 1 | 0 | 8.285046  | -8.351891 | -0.885413 |
| 222 | 1 | 0 | 7.179187  | -9.141113 | -2.021474 |
| 223 | 1 | 0 | 9.927490  | -4.591038 | -1.863785 |
| 224 | 1 | 0 | 10.928726 | -3.238167 | -1.328445 |
| 225 | 1 | 0 | 10.668687 | -4.628078 | -0.261728 |
| 226 | 1 | 0 | 6.247783  | -6.738551 | -5.623665 |
| 227 | 1 | 0 | 5.003564  | -7.896075 | -6.094200 |
| 228 | 1 | 0 | 5.300452  | -6.461826 | -7.090811 |
| 229 | 6 | 0 | -5.265821 | 0.248696  | -6.699329 |
| 230 | 8 | 0 | -0.195838 | -3.204747 | -5.081310 |
| 231 | 8 | 0 | -1.247559 | -5.389286 | -3.710122 |
| 232 | 6 | 0 | -5.990219 | 2.005501  | -5.149782 |
| 233 | 8 | 0 | -4.038714 | 2.356399  | -6.392203 |
| 234 | 8 | 0 | -7.957087 | 1.776864  | -3.865255 |
| 235 | 8 | 0 | -5.500019 | -6.514943 | -1.603650 |
| 236 | 6 | 0 | -8.553588 | -0.824924 | -5.000963 |
| 237 | 8 | 0 | -1.815004 | 0.866791  | -6.960856 |
| 238 | 6 | 0 | -4.277054 | -0.232032 | -7.743090 |
| 239 | 8 | 0 | -2.861975 | -6.544159 | -1.416384 |
| 240 | 6 | 0 | -3.205064 | -1.075545 | -7.084442 |
| 241 | 8 | 0 | -5.831187 | 3.228882  | -4.524890 |
| 242 | 6 | 0 | -7.310482 | -0.042965 | -5.374834 |
| 243 | 6 | 0 | -6.974012 | -5.512006 | -3.762692 |
| 244 | 8 | 0 | -7.564834 | -4.754450 | -0.994800 |
| 245 | 8 | 0 | -9.026958 | -0.394061 | -2.281605 |
| 246 | 8 | 0 | -8.555481 | -2.279170 | -0.316858 |
| 247 | 8 | 0 | 0.134847  | -0.510449 | -5.664313 |
| 248 | 6 | 0 | -7.102016 | 1.222131  | -4.788641 |
| 249 | 6 | 0 | -2.492724 | -4.718825 | -6.074147 |
| 250 | 6 | 0 | -5.079595 | 1.510506  | -6.102694 |
| 251 | 6 | 0 | -5.460907 | -5.515532 | -3.769584 |
| 252 | 6 | 0 | -3.359920 | -5.990806 | -2.587170 |
| 253 | 6 | 0 | -3.305674 | -5.074621 | -4.848589 |
| 254 | 6 | 0 | -4.769816 | -6.001450 | -2.647088 |
| 255 | 6 | 0 | -7.709662 | -3.130574 | -4.314245 |
| 256 | 6 | 0 | -0.998028 | -1.205717 | -6.023819 |
| 257 | 6 | 0 | -4.703377 | -5.058777 | -4.855803 |
| 258 | 6 | 0 | -2.369001 | -3.219573 | -6.233963 |
| 259 | 6 | 0 | -3.360808 | -2.447606 | -6.850779 |
| 260 | 6 | 0 | -2.001391 | -0.468119 | -6.680887 |
| 261 | 6 | 0 | -6.374711 | -0.511375 | -6.304345 |
| 262 | 6 | 0 | -7.477685 | -4.137667 | -3.371174 |
| 263 | 6 | 0 | -1.202511 | -2.575778 | -5.778682 |
| 264 | 6 | 0 | -2.628497 | -5.492155 | -3.679816 |
| 265 | 6 | 0 | -8.234715 | -1.880864 | -3.964648 |
| 266 | 6 | 0 | -7.739339 | -3.855480 | -2.015362 |
| 267 | 6 | 0 | -8.246021 | -2.600668 | -1.624467 |
| 268 | 6 | 0 | -8.499979 | -1.621321 | -2.604347 |
| 269 | 6 | 0 | -9.256754 | -1.408394 | -6.230775 |
| 270 | 6 | 0 | -3.038128 | -5.390672 | -7.339401 |
| 271 | 6 | 0 | -7.567545 | -6.009827 | -5.083331 |
| 272 | 6 | 0 | -4.957884 | -0.950337 | -8.910942 |
| 273 | 1 | 0 | -0.523584 | -4.093370 | -4.664870 |
| 274 | 1 | 0 | -0.816970 | -5.759915 | -2.874047 |
| 275 | 1 | 0 | -3.259628 | 1.849317  | -6.828731 |

|     |   |   |            |           |           |
|-----|---|---|------------|-----------|-----------|
| 276 | 1 | 0 | -8.491529  | 1.051454  | -3.380705 |
| 277 | 1 | 0 | -4.884736  | -6.816876 | -0.830905 |
| 278 | 1 | 0 | -9.287558  | -0.100915 | -4.529681 |
| 279 | 1 | 0 | -0.972146  | 1.220781  | -6.503908 |
| 280 | 1 | 0 | -3.769555  | 0.679974  | -8.182329 |
| 281 | 1 | 0 | -1.860578  | -6.408413 | -1.333254 |
| 282 | 1 | 0 | -5.212040  | 3.819589  | -5.061806 |
| 283 | 1 | 0 | -7.314634  | -6.241711 | -2.965800 |
| 284 | 1 | 0 | -6.977763  | -5.542248 | -1.292166 |
| 285 | 1 | 0 | -9.171487  | -0.303209 | -1.279837 |
| 286 | 1 | 0 | -8.311385  | -3.047047 | 0.295386  |
| 287 | 1 | 0 | 0.701712   | -1.076164 | -5.033520 |
| 288 | 1 | 0 | -1.449777  | -5.135937 | -5.920757 |
| 289 | 1 | 0 | -7.487175  | -3.331106 | -5.363961 |
| 290 | 1 | 0 | -5.223486  | -4.691245 | -5.741456 |
| 291 | 1 | 0 | -4.285911  | -2.933574 | -7.166209 |
| 292 | 1 | 0 | -6.519678  | -1.499923 | -6.744361 |
| 293 | 1 | 0 | -8.636612  | -2.130840 | -6.770862 |
| 294 | 1 | 0 | -9.527429  | -0.614974 | -6.938585 |
| 295 | 1 | 0 | -10.181026 | -1.924593 | -5.940749 |
| 296 | 1 | 0 | -3.054925  | -6.482057 | -7.219808 |
| 297 | 1 | 0 | -2.407614  | -5.161703 | -8.207164 |
| 298 | 1 | 0 | -4.057894  | -5.075818 | -7.581604 |
| 299 | 1 | 0 | -7.226211  | -7.030569 | -5.299587 |
| 300 | 1 | 0 | -7.285464  | -5.385158 | -5.936743 |
| 301 | 1 | 0 | -8.663481  | -6.029202 | -5.036367 |
| 302 | 1 | 0 | -4.222115  | -1.236394 | -9.673633 |
| 303 | 1 | 0 | -5.697964  | -0.298363 | -9.392066 |
| 304 | 1 | 0 | -5.478434  | -1.862858 | -8.602105 |
| 305 | 6 | 0 | -4.751838  | 5.235245  | 5.467005  |
| 306 | 8 | 0 | -2.616703  | 8.299871  | 0.182625  |
| 307 | 8 | 0 | -3.788567  | 6.466300  | -1.624488 |
| 308 | 6 | 0 | -4.063399  | 2.979058  | 6.124447  |
| 309 | 8 | 0 | -2.532467  | 4.844876  | 6.266754  |
| 310 | 8 | 0 | -5.535602  | 1.155441  | 6.009316  |
| 311 | 8 | 0 | -6.853911  | 2.866768  | -1.879249 |
| 312 | 6 | 0 | -7.727873  | 2.819931  | 5.042701  |
| 313 | 8 | 0 | -1.563849  | 6.927456  | 4.641176  |
| 314 | 6 | 0 | -4.396126  | 6.700478  | 5.344646  |
| 315 | 8 | 0 | -4.479513  | 4.114773  | -2.619456 |
| 316 | 6 | 0 | -3.916120  | 7.020195  | 3.944089  |
| 317 | 8 | 0 | -3.054756  | 2.210096  | 6.645093  |
| 318 | 6 | 0 | -6.342204  | 3.371419  | 5.313321  |
| 319 | 6 | 0 | -8.583418  | 3.915450  | 0.134987  |
| 320 | 8 | 0 | -8.232627  | 1.052039  | -0.353731 |
| 321 | 8 | 0 | -7.572774  | 0.136822  | 4.295313  |
| 322 | 8 | 0 | -7.787983  | -0.739903 | 1.654315  |
| 323 | 8 | 0 | -0.745156  | 7.715500  | 2.082678  |
| 324 | 6 | 0 | -5.343765  | 2.500372  | 5.792654  |
| 325 | 6 | 0 | -5.340541  | 7.850467  | 0.463756  |
| 326 | 6 | 0 | -3.772066  | 4.345806  | 5.945860  |
| 327 | 6 | 0 | -7.321825  | 4.637422  | -0.286871 |
| 328 | 6 | 0 | -5.317600  | 4.685265  | -1.694637 |
| 329 | 6 | 0 | -5.743841  | 6.510887  | -0.122816 |
| 330 | 6 | 0 | -6.524371  | 4.078406  | -1.298802 |
| 331 | 6 | 0 | -8.093954  | 3.317082  | 2.568861  |
| 332 | 6 | 0 | -2.070432  | 7.560037  | 2.429868  |
| 333 | 6 | 0 | -6.901977  | 5.840703  | 0.293840  |
| 334 | 6 | 0 | -4.385860  | 7.629267  | 1.618485  |
| 335 | 6 | 0 | -4.812064  | 7.220647  | 2.887058  |
| 336 | 6 | 0 | -2.534413  | 7.147209  | 3.692364  |
| 337 | 6 | 0 | -6.015594  | 4.722716  | 5.144683  |
| 338 | 6 | 0 | -8.257898  | 2.925353  | 1.233895  |
| 339 | 6 | 0 | -3.008196  | 7.835314  | 1.416487  |
| 340 | 6 | 0 | -4.942855  | 5.915086  | -1.117179 |
| 341 | 6 | 0 | -7.863170  | 2.393977  | 3.595056  |
| 342 | 6 | 0 | -8.124670  | 1.561463  | 0.920521  |
| 343 | 6 | 0 | -7.888088  | 0.602697  | 1.925536  |
| 344 | 6 | 0 | -7.772605  | 1.025662  | 3.263244  |
| 345 | 6 | 0 | -8.838832  | 3.787558  | 5.462080  |
| 346 | 6 | 0 | -6.536728  | 8.717151  | 0.867544  |
| 347 | 6 | 0 | -9.716105  | 4.865231  | 0.534045  |
| 348 | 6 | 0 | -5.537441  | 7.623497  | 5.782785  |
| 349 | 1 | 0 | -1.601661  | 8.426965  | 0.143485  |
| 350 | 1 | 0 | -3.322203  | 7.071203  | -0.944924 |
| 351 | 1 | 0 | -1.874828  | 4.084628  | 6.457718  |
| 352 | 1 | 0 | -6.385924  | 0.816171  | 5.553524  |
| 353 | 1 | 0 | -7.107194  | 2.989493  | -2.867260 |



|     |   |   |            |           |           |
|-----|---|---|------------|-----------|-----------|
| 354 | 1 | 0 | -7.855405  | 1.894057  | 5.684442  |
| 355 | 1 | 0 | -1.937745  | 6.375859  | 5.420990  |
| 356 | 1 | 0 | -3.536126  | 6.897108  | 6.056822  |
| 357 | 1 | 0 | -4.885262  | 3.236550  | -2.970872 |
| 358 | 1 | 0 | -3.224674  | 1.210333  | 6.492372  |
| 359 | 1 | 0 | -8.953026  | 3.331710  | -0.760432 |
| 360 | 1 | 0 | -7.825084  | 1.701852  | -1.038005 |
| 361 | 1 | 0 | -7.506814  | -0.815272 | 3.954581  |
| 362 | 1 | 0 | -7.830521  | -0.896353 | 0.640243  |
| 363 | 1 | 0 | -0.150541  | 7.693720  | 2.902134  |
| 364 | 1 | 0 | -4.792001  | 8.425322  | -0.341341 |
| 365 | 1 | 0 | -8.152895  | 4.377520  | 2.818104  |
| 366 | 1 | 0 | -7.505836  | 6.277954  | 1.090822  |
| 367 | 1 | 0 | -5.877670  | 7.059239  | 3.059256  |
| 368 | 1 | 0 | -6.775550  | 5.404297  | 4.759757  |
| 369 | 1 | 0 | -8.745305  | 4.052986  | 6.522632  |
| 370 | 1 | 0 | -8.827946  | 4.719161  | 4.887476  |
| 371 | 1 | 0 | -9.825875  | 3.328701  | 5.320366  |
| 372 | 1 | 0 | -7.205316  | 8.885874  | 0.014346  |
| 373 | 1 | 0 | -7.132217  | 8.270793  | 1.670753  |
| 374 | 1 | 0 | -6.198041  | 9.699296  | 1.222659  |
| 375 | 1 | 0 | -9.961616  | 5.550035  | -0.286824 |
| 376 | 1 | 0 | -10.625496 | 4.300979  | 0.779055  |
| 377 | 1 | 0 | -9.469368  | 5.474365  | 1.409836  |
| 378 | 1 | 0 | -6.429636  | 7.519966  | 5.157007  |
| 379 | 1 | 0 | -5.835808  | 7.408363  | 6.816832  |
| 380 | 1 | 0 | -5.227767  | 8.675199  | 5.738077  |
| 381 | 6 | 0 | -1.524511  | -8.326308 | 3.010317  |
| 382 | 8 | 0 | 2.214189   | -3.325995 | 4.545777  |
| 383 | 8 | 0 | 0.305554   | -1.154842 | 5.989104  |
| 384 | 6 | 0 | -2.568284  | -8.483868 | 0.788988  |
| 385 | 8 | 0 | -0.216008  | -8.927271 | 1.089127  |
| 386 | 8 | 0 | -4.877954  | -8.069835 | 0.481593  |
| 387 | 8 | 0 | -4.423133  | -1.005417 | 6.036353  |
| 388 | 6 | 0 | -5.313533  | -7.725314 | 3.332454  |
| 389 | 8 | 0 | 1.779900   | -7.369145 | 2.062786  |
| 390 | 6 | 0 | -0.278920  | -8.422647 | 3.867528  |
| 391 | 8 | 0 | -2.032989  | 0.224585  | 5.643925  |
| 392 | 6 | 0 | 0.361767   | -7.060582 | 4.049112  |
| 393 | 8 | 0 | -2.339706  | -8.772784 | -0.528083 |
| 394 | 6 | 0 | -3.936586  | -7.965023 | 2.747490  |
| 395 | 6 | 0 | -4.751276  | -3.735446 | 6.448685  |
| 396 | 8 | 0 | -6.174721  | -2.191716 | 4.348132  |
| 397 | 8 | 0 | -6.621440  | -6.010866 | 1.551677  |
| 398 | 8 | 0 | -6.999183  | -3.319336 | 2.020365  |
| 399 | 8 | 0 | 3.075245   | -5.027406 | 2.496012  |
| 400 | 6 | 0 | -3.813089  | -8.158012 | 1.356920  |
| 401 | 6 | 0 | 0.360778   | -4.063228 | 6.471395  |
| 402 | 6 | 0 | -1.436788  | -8.566208 | 1.627957  |
| 403 | 6 | 0 | -3.370078  | -3.135419 | 6.281802  |
| 404 | 6 | 0 | -2.015740  | -1.124253 | 5.922295  |
| 405 | 6 | 0 | -0.919013  | -3.281437 | 6.273018  |
| 406 | 6 | 0 | -3.263345  | -1.748723 | 6.063254  |
| 407 | 6 | 0 | -5.027331  | -5.680574 | 4.828006  |
| 408 | 6 | 0 | 2.046728   | -5.427592 | 3.330816  |
| 409 | 6 | 0 | -2.185992  | -3.877767 | 6.357697  |
| 410 | 6 | 0 | 0.664822   | -4.964634 | 5.293777  |
| 411 | 6 | 0 | 0.029061   | -6.196479 | 5.101817  |
| 412 | 6 | 0 | 1.366319   | -6.649531 | 3.153376  |
| 413 | 6 | 0 | -2.785897  | -8.024007 | 3.541600  |
| 414 | 6 | 0 | -5.224748  | -4.329299 | 5.138643  |
| 415 | 6 | 0 | 1.660273   | -4.567782 | 4.373276  |
| 416 | 6 | 0 | -0.840525  | -1.893920 | 6.042786  |
| 417 | 6 | 0 | -5.499171  | -6.257887 | 3.644250  |
| 418 | 6 | 0 | -5.895355  | -3.525375 | 4.196460  |
| 419 | 6 | 0 | -6.354855  | -4.066979 | 2.979041  |
| 420 | 6 | 0 | -6.163536  | -5.434919 | 2.714007  |
| 421 | 6 | 0 | -5.592069  | -8.627875 | 4.537426  |
| 422 | 6 | 0 | 0.347349   | -4.838193 | 7.793924  |
| 423 | 6 | 0 | -4.808276  | -4.727146 | 7.614883  |
| 424 | 6 | 0 | -0.544642  | -9.126236 | 5.201991  |
| 425 | 1 | 0 | 2.822332   | -3.065373 | 3.768450  |
| 426 | 1 | 0 | 1.153789   | -1.720553 | 6.074382  |
| 427 | 1 | 0 | -0.241548  | -8.846663 | 0.076323  |
| 428 | 1 | 0 | -5.703823  | -7.711557 | 0.965511  |
| 429 | 1 | 0 | -4.239811  | -0.039502 | 5.741343  |
| 430 | 1 | 0 | -6.079939  | -8.001003 | 2.540910  |
| 431 | 1 | 0 | 1.095012   | -8.100116 | 1.819653  |

|     |   |   |           |            |           |
|-----|---|---|-----------|------------|-----------|
| 432 | 1 | 0 | 0.462198  | -9.072868  | 3.309668  |
| 433 | 1 | 0 | -1.157425 | 0.667758   | 5.946854  |
| 434 | 1 | 0 | -3.051407 | -8.350180  | -1.121671 |
| 435 | 1 | 0 | -5.461461 | -2.895304  | 6.715981  |
| 436 | 1 | 0 | -5.605279 | -1.761824  | 5.086797  |
| 437 | 1 | 0 | -7.046719 | -5.313700  | 0.955952  |
| 438 | 1 | 0 | -6.919349 | -2.332303  | 2.248343  |
| 439 | 1 | 0 | 3.329501  | -5.806867  | 1.877220  |
| 440 | 1 | 0 | 1.208827  | -3.307988  | 6.549569  |
| 441 | 1 | 0 | -4.492612 | -6.312158  | 5.540112  |
| 442 | 1 | 0 | -2.250633 | -4.957236  | 6.502858  |
| 443 | 1 | 0 | -0.752116 | -6.498504  | 5.802143  |
| 444 | 1 | 0 | -2.874057 | -7.834737  | 4.612173  |
| 445 | 1 | 0 | -6.608109 | -8.466505  | 4.919079  |
| 446 | 1 | 0 | -5.503231 | -9.686152  | 4.260822  |
| 447 | 1 | 0 | -4.899363 | -8.450713  | 5.366626  |
| 448 | 1 | 0 | 0.219493  | -4.156379  | 8.644309  |
| 449 | 1 | 0 | -0.461435 | -5.573779  | 7.843368  |
| 450 | 1 | 0 | 1.291456  | -5.376941  | 7.942182  |
| 451 | 1 | 0 | -4.520682 | -4.236141  | 8.553489  |
| 452 | 1 | 0 | -5.824578 | -5.119724  | 7.744321  |
| 453 | 1 | 0 | -4.139117 | -5.582440  | 7.476794  |
| 454 | 1 | 0 | 0.382510  | -9.230892  | 5.779300  |
| 455 | 1 | 0 | -1.262570 | -8.587287  | 5.828669  |
| 456 | 1 | 0 | -0.947630 | -10.133597 | 5.035632  |
| 457 | 1 | 0 | -1.336401 | 1.331980   | -2.060345 |
| 458 | 1 | 0 | -1.783201 | -0.992779  | -2.830036 |
| 459 | 1 | 0 | 0.068040  | -2.655056  | -2.898039 |
| 460 | 1 | 0 | 5.519318  | -3.146806  | -2.363897 |
| 461 | 1 | 0 | 4.113470  | -4.284648  | -2.440553 |
| 462 | 1 | 0 | 4.885930  | -3.902785  | -0.869817 |
| 463 | 1 | 0 | 2.301466  | -3.178926  | -2.855990 |
| 464 | 1 | 0 | 4.601259  | -0.634938  | 2.345713  |
| 465 | 1 | 0 | 5.663315  | -0.432870  | 0.921454  |
| 466 | 1 | 0 | 4.096774  | 0.430773   | 1.012265  |
| 467 | 1 | 0 | 4.448241  | -2.618918  | 0.812091  |
| 468 | 1 | 0 | 1.905910  | -0.881932  | 1.042279  |
| 469 | 1 | 0 | 2.466599  | -3.902459  | 0.597991  |
| 470 | 1 | 0 | -1.759128 | -4.462240  | 1.776743  |
| 471 | 1 | 0 | -2.151172 | -5.040286  | 0.132609  |
| 472 | 1 | 0 | 0.373947  | -5.319629  | 1.169147  |
| 473 | 1 | 0 | -0.602427 | -1.838843  | 1.865024  |
| 474 | 6 | 0 | -1.729084 | -2.882919  | 0.294674  |
| 475 | 6 | 0 | -0.472198 | -2.193969  | 0.825183  |
| 476 | 7 | 0 | 0.534603  | -3.245328  | 0.769080  |
| 477 | 8 | 0 | 4.174478  | -1.404566  | -0.876296 |
| 478 | 6 | 0 | 2.546667  | -2.311867  | -2.245036 |
| 479 | 6 | 0 | -0.524287 | 0.603231   | -2.099062 |
| 480 | 6 | 0 | 0.321699  | -5.041910  | -0.940481 |
| 481 | 8 | 0 | 1.178456  | -4.457235  | -1.603018 |
| 482 | 6 | 0 | 1.551006  | -1.254058  | -2.172536 |
| 483 | 8 | 0 | -0.308622 | -6.087888  | -1.334621 |
| 484 | 6 | 0 | 1.857478  | -3.003663  | 0.755298  |
| 485 | 6 | 0 | 2.476893  | -1.800962  | 0.886854  |
| 486 | 6 | 0 | 3.917133  | -1.674755  | 0.603628  |
| 487 | 7 | 0 | 3.705464  | -2.379725  | -1.677620 |
| 488 | 6 | 0 | 4.612140  | -3.504823  | -1.855142 |
| 489 | 6 | 0 | 0.767304  | 0.984678   | -1.723019 |
| 490 | 1 | 0 | -1.760122 | -2.805498  | -0.803361 |
| 491 | 6 | 0 | -0.030076 | -4.557605  | 0.479106  |
| 492 | 6 | 0 | -1.532898 | -4.343998  | 0.704588  |
| 493 | 6 | 0 | -0.776797 | -0.699088  | -2.530051 |
| 494 | 6 | 0 | 0.257985  | -1.628586  | -2.577145 |
| 495 | 6 | 0 | 1.806412  | 0.063088   | -1.749663 |
| 496 | 1 | 0 | -0.161564 | -1.328982  | 0.214132  |
| 497 | 1 | 0 | -2.651713 | -2.438275  | 0.691568  |
| 498 | 6 | 0 | 4.617793  | -0.506247  | 1.254259  |
| 499 | 1 | 0 | 0.961378  | 2.009302   | -1.399893 |
| 500 | 1 | 0 | 2.811349  | 0.352409   | -1.447674 |

TS2a@CP<sub>6R</sub>-in

| Center<br>Number | Atomic<br>Number | Atomic<br>Type | Coordinates (Angstroms) |          |           |
|------------------|------------------|----------------|-------------------------|----------|-----------|
|                  |                  |                | X                       | Y        | Z         |
| 1                | 6                | 0              | 0.808310                | 8.122700 | -2.782183 |

|    |   |   |           |           |           |
|----|---|---|-----------|-----------|-----------|
| 2  | 8 | 0 | -2.885461 | 4.618154  | -6.576052 |
| 3  | 8 | 0 | -0.857791 | 2.605519  | -7.272871 |
| 4  | 6 | 0 | 1.426994  | 6.945224  | -0.717432 |
| 5  | 8 | 0 | -0.811923 | 7.511201  | -1.023576 |
| 6  | 8 | 0 | 3.646082  | 6.380130  | -0.223964 |
| 7  | 8 | 0 | 3.811049  | 1.710060  | -6.818359 |
| 8  | 6 | 0 | 4.608338  | 7.543845  | -2.768225 |
| 9  | 8 | 0 | -2.804932 | 7.879666  | -2.990520 |
| 10 | 6 | 0 | -0.260660 | 8.752952  | -3.651991 |
| 11 | 8 | 0 | 1.223827  | 0.803555  | -6.987167 |
| 12 | 6 | 0 | -0.951771 | 7.669615  | -4.454999 |
| 13 | 8 | 0 | 1.110356  | 6.307427  | 0.456049  |
| 14 | 6 | 0 | 3.152290  | 7.529670  | -2.352237 |
| 15 | 6 | 0 | 4.535611  | 4.394931  | -6.805466 |
| 16 | 8 | 0 | 6.036035  | 2.545367  | -5.112131 |
| 17 | 8 | 0 | 6.063366  | 5.594775  | -1.443831 |
| 18 | 8 | 0 | 6.810051  | 3.205694  | -2.529029 |
| 19 | 8 | 0 | -4.140121 | 5.740896  | -4.380835 |
| 20 | 6 | 0 | 2.777241  | 6.954483  | -1.121101 |
| 21 | 6 | 0 | -0.402795 | 5.469191  | -7.559881 |
| 22 | 6 | 0 | 0.458208  | 7.543793  | -1.549027 |
| 23 | 6 | 0 | 3.085455  | 3.974375  | -6.914398 |
| 24 | 6 | 0 | 1.432912  | 2.164177  | -7.000341 |
| 25 | 6 | 0 | 0.711122  | 4.494962  | -7.237591 |
| 26 | 6 | 0 | 2.771736  | 2.599638  | -6.903682 |
| 27 | 6 | 0 | 4.558659  | 5.924123  | -4.755589 |
| 28 | 6 | 0 | -2.885790 | 6.190272  | -4.737526 |
| 29 | 6 | 0 | 2.041886  | 4.894866  | -7.070966 |
| 30 | 6 | 0 | -1.004244 | 6.060728  | -6.304839 |
| 31 | 6 | 0 | -0.358450 | 7.060709  | -5.565542 |
| 32 | 6 | 0 | -2.237122 | 7.239954  | -4.065676 |
| 33 | 6 | 0 | 2.154392  | 8.082205  | -3.164190 |
| 34 | 6 | 0 | 4.906188  | 4.714433  | -5.371176 |
| 35 | 6 | 0 | -2.266751 | 5.617297  | -5.865728 |
| 36 | 6 | 0 | 0.413359  | 3.119924  | -7.162016 |
| 37 | 6 | 0 | 4.956716  | 6.236263  | -3.450204 |
| 38 | 6 | 0 | 5.653242  | 3.776626  | -4.632154 |
| 39 | 6 | 0 | 6.080611  | 4.061415  | -3.321982 |
| 40 | 6 | 0 | 5.713569  | 5.287121  | -2.738012 |
| 41 | 6 | 0 | 4.985692  | 8.748172  | -3.636006 |
| 42 | 6 | 0 | 0.040375  | 6.557845  | -8.542818 |
| 43 | 6 | 0 | 4.888962  | 5.546218  | -7.751723 |
| 44 | 6 | 0 | 0.262059  | 9.878841  | -4.548449 |
| 45 | 1 | 0 | -3.790513 | 4.405655  | -6.163514 |
| 46 | 1 | 0 | -1.555894 | 3.347508  | -7.329662 |
| 47 | 1 | 0 | -1.534360 | 7.656259  | -1.731118 |
| 48 | 1 | 0 | 4.525541  | 6.104011  | -0.659168 |
| 49 | 1 | 0 | 3.480585  | 0.749726  | -6.906665 |
| 50 | 1 | 0 | 5.230354  | 7.627802  | -1.827024 |
| 51 | 1 | 0 | -3.727189 | 7.494894  | -2.768738 |
| 52 | 1 | 0 | -1.024015 | 9.225941  | -2.964422 |
| 53 | 1 | 0 | 0.236950  | 0.581094  | -6.934812 |
| 54 | 1 | 0 | 0.172005  | 6.560306  | 0.767088  |
| 55 | 1 | 0 | 5.163250  | 3.507243  | -7.132980 |
| 56 | 1 | 0 | 5.516747  | 2.304876  | -5.957770 |
| 57 | 1 | 0 | 6.530631  | 4.803067  | -0.994395 |
| 58 | 1 | 0 | 7.101762  | 2.379324  | -3.043418 |
| 59 | 1 | 0 | -4.138294 | 5.464140  | -3.387956 |
| 60 | 1 | 0 | -1.220996 | 4.881718  | -8.083345 |
| 61 | 1 | 0 | 3.956387  | 6.646438  | -5.309039 |
| 62 | 1 | 0 | 2.278336  | 5.960252  | -7.087900 |
| 63 | 1 | 0 | 0.641197  | 7.377951  | -5.868641 |
| 64 | 1 | 0 | 2.439197  | 8.508071  | -4.128389 |
| 65 | 1 | 0 | 6.063443  | 8.750191  | -3.845317 |
| 66 | 1 | 0 | 4.469121  | 8.754342  | -4.601283 |
| 67 | 1 | 0 | 4.746250  | 9.689465  | -3.125629 |
| 68 | 1 | 0 | 0.444478  | 6.115676  | -9.462018 |
| 69 | 1 | 0 | -0.808712 | 7.193700  | -8.825534 |
| 70 | 1 | 0 | 0.811195  | 7.214570  | -8.127270 |
| 71 | 1 | 0 | 4.347490  | 6.468297  | -7.517133 |
| 72 | 1 | 0 | 5.960691  | 5.777579  | -7.701545 |
| 73 | 1 | 0 | 4.654840  | 5.283065  | -8.791160 |
| 74 | 1 | 0 | 0.738759  | 10.666451 | -3.951821 |
| 75 | 1 | 0 | 0.993860  | 9.530605  | -5.284305 |
| 76 | 1 | 0 | -0.563343 | 10.340687 | -5.106225 |
| 77 | 6 | 0 | 5.373442  | -0.403152 | 6.386957  |
| 78 | 8 | 0 | 0.758079  | 4.003620  | 7.300912  |
| 79 | 8 | 0 | 1.620523  | 5.816007  | 5.284465  |

|     |   |   |           |           |           |
|-----|---|---|-----------|-----------|-----------|
| 80  | 6 | 0 | 5.451329  | -1.784701 | 4.371395  |
| 81  | 8 | 0 | 3.870576  | -2.255053 | 6.137111  |
| 82  | 8 | 0 | 7.017815  | -1.444687 | 2.669083  |
| 83  | 8 | 0 | 4.971790  | 6.548644  | 1.859585  |
| 84  | 6 | 0 | 8.377325  | 0.676050  | 4.229372  |
| 85  | 8 | 0 | 2.018886  | -0.532383 | 8.090202  |
| 86  | 6 | 0 | 4.731476  | -0.076730 | 7.718778  |
| 87  | 8 | 0 | 2.230629  | 6.705348  | 2.749756  |
| 88  | 6 | 0 | 3.723651  | 1.046008  | 7.580537  |
| 89  | 8 | 0 | 4.887208  | -2.833798 | 3.676303  |
| 90  | 6 | 0 | 7.104931  | -0.010007 | 4.681280  |
| 91  | 6 | 0 | 7.006589  | 5.534800  | 3.453118  |
| 92  | 8 | 0 | 7.262235  | 4.957786  | 0.622005  |
| 93  | 8 | 0 | 8.734121  | 0.479047  | 1.483846  |
| 94  | 8 | 0 | 8.127374  | 2.447141  | -0.308218 |
| 95  | 8 | 0 | 0.059167  | 1.342980  | 7.747413  |
| 96  | 6 | 0 | 6.552755  | -1.045719 | 3.906061  |
| 97  | 6 | 0 | 3.518345  | 4.864498  | 7.110036  |
| 98  | 6 | 0 | 4.885412  | -1.489498 | 5.629697  |
| 99  | 6 | 0 | 5.575239  | 5.568161  | 3.936614  |
| 100 | 6 | 0 | 3.235397  | 6.152495  | 3.515428  |
| 101 | 6 | 0 | 3.893756  | 5.224523  | 5.689905  |
| 102 | 6 | 0 | 4.577300  | 6.094516  | 3.091334  |
| 103 | 6 | 0 | 7.617335  | 3.078404  | 3.789725  |
| 104 | 6 | 0 | 1.375708  | 1.752664  | 7.621620  |
| 105 | 6 | 0 | 5.205214  | 5.128590  | 5.213044  |
| 106 | 6 | 0 | 3.136777  | 3.405818  | 7.245784  |
| 107 | 6 | 0 | 4.082313  | 2.373792  | 7.317921  |
| 108 | 6 | 0 | 2.356419  | 0.747119  | 7.759826  |
| 109 | 6 | 0 | 6.468272  | 0.313161  | 5.888143  |
| 110 | 6 | 0 | 7.371906  | 4.159072  | 2.934749  |
| 111 | 6 | 0 | 1.772886  | 3.072520  | 7.363869  |
| 112 | 6 | 0 | 2.904774  | 5.722453  | 4.815718  |
| 113 | 6 | 0 | 8.064440  | 1.840511  | 3.312892  |
| 114 | 6 | 0 | 7.504607  | 3.963138  | 1.546081  |
| 115 | 6 | 0 | 7.942355  | 2.731453  | 1.029615  |
| 116 | 6 | 0 | 8.248659  | 1.688271  | 1.925286  |
| 117 | 6 | 0 | 9.272634  | 1.103390  | 5.397405  |
| 118 | 6 | 0 | 4.599165  | 5.257965  | 8.123313  |
| 119 | 6 | 0 | 7.999359  | 6.016978  | 4.515644  |
| 120 | 6 | 0 | 5.766377  | 0.235823  | 8.805844  |
| 121 | 1 | 0 | 1.095562  | 4.874123  | 6.890232  |
| 122 | 1 | 0 | 0.985631  | 6.127404  | 4.554157  |
| 123 | 1 | 0 | 3.729179  | -3.089819 | 5.563706  |
| 124 | 1 | 0 | 7.642453  | -0.754657 | 2.251228  |
| 125 | 1 | 0 | 4.200690  | 7.005451  | 1.367496  |
| 126 | 1 | 0 | 8.975593  | -0.080727 | 3.637229  |
| 127 | 1 | 0 | 1.021305  | -0.668262 | 8.030933  |
| 128 | 1 | 0 | 4.170853  | -1.004515 | 8.052588  |
| 129 | 1 | 0 | 2.233311  | 6.308303  | 1.799887  |
| 130 | 1 | 0 | 5.413501  | -3.022611 | 2.821098  |
| 131 | 1 | 0 | 7.084643  | 6.264549  | 2.586569  |
| 132 | 1 | 0 | 6.719118  | 5.714873  | 1.044355  |
| 133 | 1 | 0 | 8.876120  | 0.481709  | 0.476020  |
| 134 | 1 | 0 | 7.913721  | 3.249115  | -0.881661 |
| 135 | 1 | 0 | -0.532003 | 2.136550  | 7.952260  |
| 136 | 1 | 0 | 2.601024  | 5.482638  | 7.368094  |
| 137 | 1 | 0 | 7.465408  | 3.206068  | 4.863130  |
| 138 | 1 | 0 | 5.973654  | 4.715333  | 5.869727  |
| 139 | 1 | 0 | 5.136238  | 2.615576  | 7.175674  |
| 140 | 1 | 0 | 6.856694  | 1.145555  | 6.478447  |
| 141 | 1 | 0 | 9.518947  | 0.244660  | 6.034823  |
| 142 | 1 | 0 | 10.216772 | 1.523857  | 5.028396  |
| 143 | 1 | 0 | 8.805540  | 1.861351  | 6.034504  |
| 144 | 1 | 0 | 5.530508  | 4.700009  | 7.983946  |
| 145 | 1 | 0 | 4.257836  | 5.063861  | 9.148327  |
| 146 | 1 | 0 | 4.837516  | 6.325846  | 8.048378  |
| 147 | 1 | 0 | 8.021139  | 5.369664  | 5.398290  |
| 148 | 1 | 0 | 7.742947  | 7.027772  | 4.857723  |
| 149 | 1 | 0 | 9.019165  | 6.050615  | 4.112305  |
| 150 | 1 | 0 | 6.486521  | -0.584675 | 8.907207  |
| 151 | 1 | 0 | 5.273689  | 0.365448  | 9.777928  |
| 152 | 1 | 0 | 6.329949  | 1.151089  | 8.603493  |
| 153 | 6 | 0 | 3.472553  | -4.768939 | -5.415327 |
| 154 | 8 | 0 | 3.333805  | -8.368440 | -0.018715 |
| 155 | 8 | 0 | 4.864707  | -6.697637 | 1.419782  |
| 156 | 6 | 0 | 2.644493  | -2.489000 | -5.714406 |
| 157 | 8 | 0 | 1.129078  | -4.381892 | -5.603792 |

|     |   |   |           |           |           |
|-----|---|---|-----------|-----------|-----------|
| 158 | 8 | 0 | 4.085686  | -0.661212 | -5.882751 |
| 159 | 8 | 0 | 8.127628  | -3.251360 | 1.335787  |
| 160 | 6 | 0 | 6.474409  | -2.362873 | -5.647353 |
| 161 | 8 | 0 | 0.784294  | -6.790884 | -3.742993 |
| 162 | 6 | 0 | 3.180748  | -6.251022 | -5.313584 |
| 163 | 8 | 0 | 6.160479  | -4.651449 | 2.647037  |
| 164 | 6 | 0 | 3.232153  | -6.727741 | -3.877233 |
| 165 | 8 | 0 | 1.563960  | -1.647264 | -5.881683 |
| 166 | 6 | 0 | 5.058510  | -2.899355 | -5.572895 |
| 167 | 6 | 0 | 8.843505  | -3.708259 | -1.324003 |
| 168 | 8 | 0 | 8.146883  | -1.019569 | -0.358237 |
| 169 | 8 | 0 | 6.260375  | 0.212863  | -4.555115 |
| 170 | 8 | 0 | 6.877240  | 0.839020  | -2.000395 |
| 171 | 8 | 0 | 0.890048  | -7.736715 | -1.163359 |
| 172 | 6 | 0 | 3.970989  | -2.018778 | -5.714440 |
| 173 | 6 | 0 | 5.778985  | -7.797824 | -1.195558 |
| 174 | 6 | 0 | 2.396545  | -3.868585 | -5.577788 |
| 175 | 6 | 0 | 7.857348  | -4.607701 | -0.610507 |
| 176 | 6 | 0 | 6.489721  | -5.041210 | 1.363332  |
| 177 | 6 | 0 | 6.322115  | -6.527213 | -0.573087 |
| 178 | 6 | 0 | 7.485655  | -4.294906 | 0.712672  |
| 179 | 6 | 0 | 7.625388  | -2.994931 | -3.447621 |
| 180 | 6 | 0 | 2.029481  | -7.502260 | -1.880809 |
| 181 | 6 | 0 | 7.277802  | -5.728093 | -1.216261 |
| 182 | 6 | 0 | 4.482919  | -7.510049 | -1.922479 |
| 183 | 6 | 0 | 4.441157  | -6.971983 | -3.212864 |
| 184 | 6 | 0 | 2.025740  | -6.981394 | -3.195966 |
| 185 | 6 | 0 | 4.776587  | -4.261211 | -5.399562 |
| 186 | 6 | 0 | 8.080046  | -2.696401 | -2.156664 |
| 187 | 6 | 0 | 3.264275  | -7.790410 | -1.274692 |
| 188 | 6 | 0 | 5.883366  | -6.129498 | 0.704735  |
| 189 | 6 | 0 | 6.982640  | -2.048786 | -4.255306 |
| 190 | 6 | 0 | 7.812941  | -1.416817 | -1.630237 |
| 191 | 6 | 0 | 7.184686  | -0.435897 | -2.418805 |
| 192 | 6 | 0 | 6.798664  | -0.755361 | -3.733615 |
| 193 | 6 | 0 | 7.412643  | -3.292257 | -6.422630 |
| 194 | 6 | 0 | 6.797133  | -8.508997 | -2.091811 |
| 195 | 6 | 0 | 9.871053  | -4.489691 | -2.146860 |
| 196 | 6 | 0 | 4.095976  | -7.082008 | -6.220473 |
| 197 | 1 | 0 | 2.418741  | -8.356381 | 0.428902  |
| 198 | 1 | 0 | 4.438426  | -7.511370 | 0.931505  |
| 199 | 1 | 0 | 0.434125  | -3.638846 | -5.725713 |
| 200 | 1 | 0 | 4.967520  | -0.305264 | -5.492940 |
| 201 | 1 | 0 | 7.741187  | -3.080126 | 2.268670  |
| 202 | 1 | 0 | 6.443038  | -1.390694 | -6.225240 |
| 203 | 1 | 0 | 0.797504  | -6.031653 | -4.413511 |
| 204 | 1 | 0 | 2.125111  | -6.414297 | -5.692248 |
| 205 | 1 | 0 | 5.475738  | -5.275899 | 3.036740  |
| 206 | 1 | 0 | 1.893954  | -0.695416 | -6.044391 |
| 207 | 1 | 0 | 9.428931  | -3.142857 | -0.538410 |
| 208 | 1 | 0 | 8.219467  | -1.821754 | 0.277106  |
| 209 | 1 | 0 | 5.961833  | 1.030898  | -4.021891 |
| 210 | 1 | 0 | 7.192096  | 1.005609  | -1.047718 |
| 211 | 1 | 0 | 0.119788  | -7.100680 | -1.530283 |
| 212 | 1 | 0 | 5.549946  | -8.515018 | -0.349936 |
| 213 | 1 | 0 | 7.782429  | -4.001032 | -3.841360 |
| 214 | 1 | 0 | 7.586063  | -5.992003 | -2.230548 |
| 215 | 1 | 0 | 5.378635  | -6.748239 | -3.722012 |
| 216 | 1 | 0 | 5.607239  | -4.956437 | -5.264257 |
| 217 | 1 | 0 | 7.035910  | -3.464048 | -7.439204 |
| 218 | 1 | 0 | 8.413594  | -2.851478 | -6.509650 |
| 219 | 1 | 0 | 7.525404  | -4.272638 | -5.948239 |
| 220 | 1 | 0 | 7.076824  | -7.916508 | -2.968821 |
| 221 | 1 | 0 | 7.715330  | -8.740045 | -1.538441 |
| 222 | 1 | 0 | 6.384826  | -9.457458 | -2.461745 |
| 223 | 1 | 0 | 9.413260  | -5.089551 | -2.940265 |
| 224 | 1 | 0 | 10.587655 | -3.809240 | -2.624078 |
| 225 | 1 | 0 | 10.440454 | -5.175295 | -1.506163 |
| 226 | 1 | 0 | 5.150994  | -7.006931 | -5.940542 |
| 227 | 1 | 0 | 3.822150  | -8.144041 | -6.176161 |
| 228 | 1 | 0 | 4.007208  | -6.758702 | -7.264785 |
| 229 | 6 | 0 | -6.024436 | 0.594770  | -6.097697 |
| 230 | 8 | 0 | -1.039035 | -3.052126 | -4.846882 |
| 231 | 8 | 0 | -1.997561 | -5.357393 | -3.656303 |
| 232 | 6 | 0 | -6.537853 | 2.356867  | -4.471463 |
| 233 | 8 | 0 | -4.732663 | 2.677635  | -5.927521 |
| 234 | 8 | 0 | -8.351094 | 2.154432  | -2.973386 |
| 235 | 8 | 0 | -6.081420 | -6.376702 | -1.211087 |

|     |   |   |            |           |           |
|-----|---|---|------------|-----------|-----------|
| 236 | 6 | 0 | -9.143579  | -0.410132 | -4.073332 |
| 237 | 8 | 0 | -2.615568  | 1.090156  | -6.577933 |
| 238 | 6 | 0 | -5.151530  | 0.093287  | -7.231445 |
| 239 | 8 | 0 | -3.434010  | -6.454675 | -1.247124 |
| 240 | 6 | 0 | -4.066857  | -0.804742 | -6.673320 |
| 241 | 8 | 0 | -6.280748  | 3.569745  | -3.859006 |
| 242 | 6 | 0 | -7.922652  | 0.340525  | -4.565436 |
| 243 | 6 | 0 | -7.703372  | -5.222186 | -3.187539 |
| 244 | 8 | 0 | -7.936501  | -4.546099 | -0.345954 |
| 245 | 8 | 0 | -9.233094  | -0.052811 | -1.308229 |
| 246 | 8 | 0 | -8.630412  | -2.029192 | 0.525876  |
| 247 | 8 | 0 | -0.636906  | -0.395904 | -5.404420 |
| 248 | 6 | 0 | -7.619747  | 1.593638  | -3.994613 |
| 249 | 6 | 0 | -3.405330  | -4.503467 | -5.861389 |
| 250 | 6 | 0 | -5.750438  | 1.850411  | -5.522600 |
| 251 | 6 | 0 | -6.200073  | -5.304158 | -3.342507 |
| 252 | 6 | 0 | -4.025231  | -5.885909 | -2.365802 |
| 253 | 6 | 0 | -4.131804  | -4.902288 | -4.595926 |
| 254 | 6 | 0 | -5.434478  | -5.854594 | -2.300526 |
| 255 | 6 | 0 | -8.358508  | -2.784172 | -3.570864 |
| 256 | 6 | 0 | -1.816488  | -1.030357 | -5.730378 |
| 257 | 6 | 0 | -5.523452  | -4.836974 | -4.477328 |
| 258 | 6 | 0 | -3.249146  | -3.000935 | -5.944133 |
| 259 | 6 | 0 | -4.246712  | -2.179680 | -6.486135 |
| 260 | 6 | 0 | -2.824359  | -0.244252 | -6.317276 |
| 261 | 6 | 0 | -7.102394  | -0.143127 | -5.591360 |
| 262 | 6 | 0 | -8.078915  | -3.838823 | -2.695021 |
| 263 | 6 | 0 | -2.055770  | -2.399557 | -5.503963 |
| 264 | 6 | 0 | -3.376430  | -5.392424 | -3.508152 |
| 265 | 6 | 0 | -8.755687  | -1.519883 | -3.120394 |
| 266 | 6 | 0 | -8.158296  | -3.594704 | -1.309059 |
| 267 | 6 | 0 | -8.516672  | -2.323754 | -0.818805 |
| 268 | 6 | 0 | -8.827895  | -1.295081 | -1.729960 |
| 269 | 6 | 0 | -10.008808 | -0.912080 | -5.234083 |
| 270 | 6 | 0 | -4.070910  | -5.088886 | -7.111982 |
| 271 | 6 | 0 | -8.449989  | -5.630601 | -4.459302 |
| 272 | 6 | 0 | -5.962810  | -0.571585 | -8.345812 |
| 273 | 1 | 0 | -1.363052  | -3.934440 | -4.419633 |
| 274 | 1 | 0 | -1.526701  | -5.728376 | -2.850289 |
| 275 | 1 | 0 | -4.017675  | 2.153041  | -6.443044 |
| 276 | 1 | 0 | -8.846536  | 1.433276  | -2.444125 |
| 277 | 1 | 0 | -5.401732  | -6.734730 | -0.511963 |
| 278 | 1 | 0 | -9.786295  | 0.320736  | -3.491396 |
| 279 | 1 | 0 | -1.736468  | 1.411024  | -6.176893 |
| 280 | 1 | 0 | -4.641442  | 0.990045  | -7.698687 |
| 281 | 1 | 0 | -2.453487  | -6.218360 | -1.186734 |
| 282 | 1 | 0 | -5.707862  | 4.149185  | -4.455885 |
| 283 | 1 | 0 | -8.005967  | -5.964507 | -2.386249 |
| 284 | 1 | 0 | -7.544705  | -5.401497 | -0.753809 |
| 285 | 1 | 0 | -9.249030  | 0.010171  | -0.293989 |
| 286 | 1 | 0 | -8.316100  | -2.814629 | 1.082829  |
| 287 | 1 | 0 | 0.013386   | -1.072570 | -4.982707 |
| 288 | 1 | 0 | -2.367550  | -4.955520 | -5.818878 |
| 289 | 1 | 0 | -8.280109  | -2.957511 | -4.645802 |
| 290 | 1 | 0 | -6.104414  | -4.414939 | -5.298820 |
| 291 | 1 | 0 | -5.196483  | -2.631114 | -6.779476 |
| 292 | 1 | 0 | -7.315143  | -1.125531 | -6.016966 |
| 293 | 1 | 0 | -9.484037  | -1.627057 | -5.875597 |
| 294 | 1 | 0 | -10.330397 | -0.077587 | -5.869845 |
| 295 | 1 | 0 | -10.911565 | -1.410788 | -4.858663 |
| 296 | 1 | 0 | -4.102427  | -6.184980 | -7.054074 |
| 297 | 1 | 0 | -3.508994  | -4.821606 | -8.015508 |
| 298 | 1 | 0 | -5.099643  | -4.741819 | -7.249044 |
| 299 | 1 | 0 | -8.192217  | -6.658591 | -4.745906 |
| 300 | 1 | 0 | -8.215500  | -4.987031 | -5.313286 |
| 301 | 1 | 0 | -9.535625  | -5.591369 | -4.305279 |
| 302 | 1 | 0 | -5.309460  | -0.881584 | -9.171575 |
| 303 | 1 | 0 | -6.706671  | 0.124081  | -8.754699 |
| 304 | 1 | 0 | -6.502337  | -1.461256 | -8.004504 |
| 305 | 6 | 0 | -3.924288  | 5.202696  | 6.027212  |
| 306 | 8 | 0 | -2.345718  | 8.385732  | 0.593430  |
| 307 | 8 | 0 | -3.805337  | 6.692068  | -1.141590 |
| 308 | 6 | 0 | -3.260565  | 2.931151  | 6.659106  |
| 309 | 8 | 0 | -1.659897  | 4.747665  | 6.637227  |
| 310 | 8 | 0 | -4.806185  | 1.159996  | 6.686797  |
| 311 | 8 | 0 | -6.958607  | 3.157062  | -1.119437 |
| 312 | 6 | 0 | -7.001775  | 2.884055  | 5.873949  |
| 313 | 8 | 0 | -0.804648  | 6.753355  | 4.815843  |

|     |   |   |            |           |           |
|-----|---|---|------------|-----------|-----------|
| 314 | 6 | 0 | -3.535570  | 6.657091  | 5.878191  |
| 315 | 8 | 0 | -4.677669  | 4.388504  | -2.122773 |
| 316 | 6 | 0 | -3.220186  | 6.993473  | 4.436103  |
| 317 | 8 | 0 | -2.243984  | 2.135474  | 7.120539  |
| 318 | 6 | 0 | -5.581996  | 3.393609  | 6.021923  |
| 319 | 6 | 0 | -8.388724  | 4.161617  | 1.136866  |
| 320 | 8 | 0 | -8.160929  | 1.310095  | 0.519480  |
| 321 | 8 | 0 | -6.976353  | 0.222628  | 5.022393  |
| 322 | 8 | 0 | -7.535779  | -0.559185 | 2.407288  |
| 323 | 8 | 0 | -0.279645  | 7.656016  | 2.217602  |
| 324 | 6 | 0 | -4.578721  | 2.494839  | 6.434539  |
| 325 | 6 | 0 | -5.028901  | 8.010478  | 1.190882  |
| 326 | 6 | 0 | -2.938453  | 4.284208  | 6.433389  |
| 327 | 6 | 0 | -7.174214  | 4.874047  | 0.581966  |
| 328 | 6 | 0 | -5.371416  | 4.940662  | -1.075918 |
| 329 | 6 | 0 | -5.542319  | 6.707764  | 0.606805  |
| 330 | 6 | 0 | -6.529229  | 4.340834  | -0.545648 |
| 331 | 6 | 0 | -7.625794  | 3.471401  | 3.473903  |
| 332 | 6 | 0 | -1.556595  | 7.522807  | 2.722242  |
| 333 | 6 | 0 | -6.652172  | 6.044247  | 1.147111  |
| 334 | 6 | 0 | -3.949050  | 7.713142  | 2.210436  |
| 335 | 6 | 0 | -4.230839  | 7.271919  | 3.508022  |
| 336 | 6 | 0 | -1.876031  | 7.068898  | 4.014977  |
| 337 | 6 | 0 | -5.226260  | 4.731367  | 5.811192  |
| 338 | 6 | 0 | -7.953722  | 3.129244  | 2.155957  |
| 339 | 6 | 0 | -2.599631  | 7.877992  | 1.845353  |
| 340 | 6 | 0 | -4.894533  | 6.139627  | -0.508433 |
| 341 | 6 | 0 | -7.299313  | 2.509586  | 4.436950  |
| 342 | 6 | 0 | -7.889850  | 1.774121  | 1.786730  |
| 343 | 6 | 0 | -7.561550  | 0.777599  | 2.726318  |
| 344 | 6 | 0 | -7.277530  | 1.151638  | 4.054223  |
| 345 | 6 | 0 | -8.033821  | 3.865269  | 6.438723  |
| 346 | 6 | 0 | -6.140046  | 8.890522  | 1.770250  |
| 347 | 6 | 0 | -9.440635  | 5.120009  | 1.702386  |
| 348 | 6 | 0 | -4.585210  | 7.603491  | 6.470539  |
| 349 | 1 | 0 | -1.338425  | 8.470276  | 0.426660  |
| 350 | 1 | 0 | -3.240585  | 7.259286  | -0.504946 |
| 351 | 1 | 0 | -1.013584  | 3.971385  | 6.786678  |
| 352 | 1 | 0 | -5.699886  | 0.853567  | 6.295402  |
| 353 | 1 | 0 | -7.344121  | 3.321483  | -2.056432 |
| 354 | 1 | 0 | -7.089795  | 1.938613  | 6.494831  |
| 355 | 1 | 0 | -1.105271  | 6.198315  | 5.623717  |
| 356 | 1 | 0 | -2.589005  | 6.816021  | 6.481743  |
| 357 | 1 | 0 | -5.138248  | 3.523138  | -2.435735 |
| 358 | 1 | 0 | -2.469771  | 1.141500  | 7.022770  |
| 359 | 1 | 0 | -8.880487  | 3.614849  | 0.277607  |
| 360 | 1 | 0 | -7.823934  | 1.973985  | -0.189357 |
| 361 | 1 | 0 | -6.992990  | -0.720063 | 4.644965  |
| 362 | 1 | 0 | -7.741352  | -0.684470 | 1.409910  |
| 363 | 1 | 0 | 0.416207   | 7.508185  | 2.935630  |
| 364 | 1 | 0 | -4.563144  | 8.604124  | 0.348150  |
| 365 | 1 | 0 | -7.632573  | 4.523590  | 3.762112  |
| 366 | 1 | 0 | -7.134853  | 6.460361  | 2.032958  |
| 367 | 1 | 0 | -5.272898  | 7.148612  | 3.808241  |
| 368 | 1 | 0 | -5.991257  | 5.434679  | 5.479580  |
| 369 | 1 | 0 | -7.825391  | 4.086731  | 7.493023  |
| 370 | 1 | 0 | -8.050211  | 4.818201  | 5.900387  |
| 371 | 1 | 0 | -9.044408  | 3.440800  | 6.381720  |
| 372 | 1 | 0 | -6.900087  | 9.113515  | 1.011258  |
| 373 | 1 | 0 | -6.649372  | 8.425869  | 2.620906  |
| 374 | 1 | 0 | -5.730422  | 9.847053  | 2.120440  |
| 375 | 1 | 0 | -9.770842  | 5.834834  | 0.938786  |
| 376 | 1 | 0 | -10.324981 | 4.566141  | 2.043548  |
| 377 | 1 | 0 | -9.072133  | 5.696908  | 2.556955  |
| 378 | 1 | 0 | -5.553025  | 7.532882  | 5.964100  |
| 379 | 1 | 0 | -4.754322  | 7.379992  | 7.531686  |
| 380 | 1 | 0 | -4.254189  | 8.647158  | 6.399267  |
| 381 | 6 | 0 | -1.457553  | -8.264234 | 2.692354  |
| 382 | 8 | 0 | 2.475395   | -3.350129 | 4.267049  |
| 383 | 8 | 0 | 0.881008   | -1.360075 | 6.102392  |
| 384 | 6 | 0 | -2.785420  | -8.463916 | 0.634988  |
| 385 | 8 | 0 | -0.378223  | -8.800688 | 0.641769  |
| 386 | 8 | 0 | -5.127622  | -8.091707 | 0.651685  |
| 387 | 8 | 0 | -3.829510  | -1.056159 | 6.472692  |
| 388 | 6 | 0 | -5.161477  | -7.633655 | 3.513050  |
| 389 | 8 | 0 | 1.533809   | -6.955098 | 1.316704  |
| 390 | 6 | 0 | -0.102727  | -8.360287 | 3.359507  |
| 391 | 8 | 0 | -1.421084  | 0.119530  | 6.023694  |

|     |   |   |           |            |           |
|-----|---|---|-----------|------------|-----------|
| 392 | 6 | 0 | 0.501936  | -6.986877  | 3.562907  |
| 393 | 8 | 0 | -2.745713 | -8.769419  | -0.699285 |
| 394 | 6 | 0 | -3.879647 | -7.913050  | 2.755091  |
| 395 | 6 | 0 | -4.231282 | -3.793326  | 6.730889  |
| 396 | 8 | 0 | -5.636160 | -2.094851  | 4.735798  |
| 397 | 8 | 0 | -6.407752 | -5.779281  | 1.834363  |
| 398 | 8 | 0 | -6.595623 | -3.083890  | 2.401857  |
| 399 | 8 | 0 | 2.855886  | -4.657986  | 1.858312  |
| 400 | 6 | 0 | -3.944754 | -8.146044  | 1.367115  |
| 401 | 6 | 0 | 0.849233  | -4.304786  | 6.317087  |
| 402 | 6 | 0 | -1.549074 | -8.510548  | 1.310258  |
| 403 | 6 | 0 | -2.841380 | -3.229298  | 6.514569  |
| 404 | 6 | 0 | -1.436788 | -1.243968  | 6.205079  |
| 405 | 6 | 0 | -0.405987 | -3.459047  | 6.311453  |
| 406 | 6 | 0 | -2.695825 | -1.834806  | 6.385945  |
| 407 | 6 | 0 | -4.692098 | -5.662342  | 5.062497  |
| 408 | 6 | 0 | 2.004189  | -5.218502  | 2.794853  |
| 409 | 6 | 0 | -1.686345 | -4.016362  | 6.449779  |
| 410 | 6 | 0 | 0.993033  | -5.060566  | 5.013560  |
| 411 | 6 | 0 | 0.341803  | -6.272827  | 4.760222  |
| 412 | 6 | 0 | 1.302190  | -6.418110  | 2.554050  |
| 413 | 6 | 0 | -2.632554 | -7.958143  | 3.389131  |
| 414 | 6 | 0 | -4.791668 | -4.312480  | 5.423471  |
| 415 | 6 | 0 | 1.840927  | -4.540282  | 4.014060  |
| 416 | 6 | 0 | -0.289022 | -2.062094  | 6.184866  |
| 417 | 6 | 0 | -5.240197 | -6.168850  | 3.879522  |
| 418 | 6 | 0 | -5.443944 | -3.437467  | 4.533558  |
| 419 | 6 | 0 | -5.976411 | -3.906753  | 3.315638  |
| 420 | 6 | 0 | -5.880390 | -5.274075  | 2.998610  |
| 421 | 6 | 0 | -5.326438 | -8.566608  | 4.715515  |
| 422 | 6 | 0 | 0.909000  | -5.226872  | 7.538594  |
| 423 | 6 | 0 | -4.253906 | -4.831998  | 7.856647  |
| 424 | 6 | 0 | -0.165796 | -9.178738  | 4.654233  |
| 425 | 1 | 0 | 3.088347  | -3.080819  | 3.490920  |
| 426 | 1 | 0 | 1.702373  | -1.957946  | 6.005961  |
| 427 | 1 | 0 | -0.545210 | -8.912235  | -0.355941 |
| 428 | 1 | 0 | -5.876945 | -7.737736  | 1.249958  |
| 429 | 1 | 0 | -3.625293 | -0.077054  | 6.235988  |
| 430 | 1 | 0 | -6.034609 | -7.847833  | 2.817246  |
| 431 | 1 | 0 | 0.705331  | -7.440226  | 0.915956  |
| 432 | 1 | 0 | 0.585024  | -8.927958  | 2.662268  |
| 433 | 1 | 0 | -0.488040 | 0.505592   | 6.214129  |
| 434 | 1 | 0 | -3.516159 | -8.321945  | -1.187773 |
| 435 | 1 | 0 | -4.899759 | -2.946154  | 7.072215  |
| 436 | 1 | 0 | -5.018952 | -1.720005  | 5.465716  |
| 437 | 1 | 0 | -6.810925 | -5.035446  | 1.276286  |
| 438 | 1 | 0 | -6.468118 | -2.112357  | 2.678677  |
| 439 | 1 | 0 | 3.340373  | -5.411145  | 1.367589  |
| 440 | 1 | 0 | 1.736208  | -3.598689  | 6.400447  |
| 441 | 1 | 0 | -4.174617 | -6.349948  | 5.734570  |
| 442 | 1 | 0 | -1.784388 | -5.100773  | 6.518004  |
| 443 | 1 | 0 | -0.308514 | -6.687818  | 5.533649  |
| 444 | 1 | 0 | -2.574233 | -7.749040  | 4.457616  |
| 445 | 1 | 0 | -6.268838 | -8.367365  | 5.240467  |
| 446 | 1 | 0 | -5.337360 | -9.616290  | 4.395114  |
| 447 | 1 | 0 | -4.515287 | -8.461867  | 5.443728  |
| 448 | 1 | 0 | 0.884998  | -4.643905  | 8.468308  |
| 449 | 1 | 0 | 0.071439  | -5.930696  | 7.577296  |
| 450 | 1 | 0 | 1.834395  | -5.815791  | 7.541377  |
| 451 | 1 | 0 | -3.902040 | -4.388847  | 8.797241  |
| 452 | 1 | 0 | -5.272435 | -5.202787  | 8.026127  |
| 453 | 1 | 0 | -3.617110 | -5.697530  | 7.647322  |
| 454 | 1 | 0 | 0.828711  | -9.274569  | 5.106344  |
| 455 | 1 | 0 | -0.830110 | -8.736866  | 5.403500  |
| 456 | 1 | 0 | -0.535858 | -10.192006 | 4.449946  |
| 457 | 1 | 0 | 2.583459  | 3.017809   | -3.826685 |
| 458 | 1 | 0 | 0.783426  | 1.380741   | -4.385620 |
| 459 | 1 | 0 | 0.889915  | -0.927368  | -3.501768 |
| 460 | 1 | 0 | 4.782724  | -4.438158  | -1.289186 |
| 461 | 1 | 0 | 3.134265  | -4.540789  | -2.021665 |
| 462 | 1 | 0 | 3.312216  | -4.341640  | -0.256749 |
| 463 | 1 | 0 | 1.946824  | -2.664985  | -2.362413 |
| 464 | 1 | 0 | 3.508172  | -0.333849  | 2.369812  |
| 465 | 1 | 0 | 5.083867  | -0.667632  | 1.601202  |
| 466 | 1 | 0 | 3.902280  | 0.409262   | 0.797646  |
| 467 | 1 | 0 | 3.471388  | -2.592794  | 1.335572  |
| 468 | 1 | 0 | 1.673507  | -0.500200  | -0.003394 |
| 469 | 1 | 0 | 1.488525  | -3.507731  | 0.754457  |



|     |   |   |           |           |           |
|-----|---|---|-----------|-----------|-----------|
| 470 | 1 | 0 | -2.857280 | -2.998582 | 0.452656  |
| 471 | 1 | 0 | -2.880379 | -4.174764 | -0.883646 |
| 472 | 1 | 0 | -0.886212 | -4.346085 | 0.933216  |
| 473 | 1 | 0 | -1.203764 | -0.716541 | 0.040079  |
| 474 | 6 | 0 | -2.004409 | -2.191433 | -1.378455 |
| 475 | 6 | 0 | -0.845727 | -1.477833 | -0.674258 |
| 476 | 7 | 0 | -0.165374 | -2.551828 | 0.056043  |
| 477 | 8 | 0 | 4.387248  | -1.962711 | -0.439046 |
| 478 | 6 | 0 | 2.698094  | -2.001107 | -1.921481 |
| 479 | 6 | 0 | 2.626605  | 1.998803  | -3.436943 |
| 480 | 6 | 0 | -0.281834 | -4.709314 | -1.116223 |
| 481 | 8 | 0 | 0.677096  | -4.305462 | -1.768048 |
| 482 | 6 | 0 | 2.729923  | -0.608702 | -2.406783 |
| 483 | 8 | 0 | -0.881513 | -5.831830 | -1.270454 |
| 484 | 6 | 0 | 1.118525  | -2.550365 | 0.353838  |
| 485 | 6 | 0 | 2.033872  | -1.514677 | 0.178939  |
| 486 | 6 | 0 | 3.415346  | -1.690269 | 0.700771  |
| 487 | 7 | 0 | 3.747132  | -2.643441 | -1.412744 |
| 488 | 6 | 0 | 3.745614  | -4.081460 | -1.239389 |
| 489 | 6 | 0 | 3.698165  | 1.597343  | -2.637787 |
| 490 | 1 | 0 | -1.683696 | -2.579695 | -2.355807 |
| 491 | 6 | 0 | -0.907750 | -3.813062 | -0.029991 |
| 492 | 6 | 0 | -2.311130 | -3.356770 | -0.435208 |
| 493 | 6 | 0 | 1.616449  | 1.087714  | -3.743247 |
| 494 | 6 | 0 | 1.671733  | -0.207368 | -3.235798 |
| 495 | 6 | 0 | 3.756727  | 0.306419  | -2.123507 |
| 496 | 1 | 0 | -0.139856 | -0.991132 | -1.362327 |
| 497 | 1 | 0 | -2.859937 | -1.521106 | -1.536045 |
| 498 | 6 | 0 | 4.014632  | -0.496985 | 1.408695  |
| 499 | 1 | 0 | 4.497676  | 2.300128  | -2.392023 |
| 500 | 1 | 0 | 4.600822  | 0.006127  | -1.502873 |

-----

**Pl<sub>a</sub>@CP<sub>6R</sub>-in**

| Center<br>Number | Atomic<br>Number | Atomic<br>Type | Coordinates (Angstroms) |          |           |
|------------------|------------------|----------------|-------------------------|----------|-----------|
|                  |                  |                | X                       | Y        | Z         |
| 1                | 6                | 0              | 0.302865                | 7.979844 | -3.239271 |
| 2                | 8                | 0              | -2.887642               | 3.896190 | -6.919547 |
| 3                | 8                | 0              | -0.640659               | 2.017075 | -7.514659 |
| 4                | 6                | 0              | 0.908874                | 7.025289 | -1.058648 |
| 5                | 8                | 0              | -1.350494               | 7.372703 | -1.510093 |
| 6                | 8                | 0              | 3.139870                | 6.683852 | -0.425932 |
| 7                | 8                | 0              | 4.071838                | 1.615634 | -6.813664 |
| 8                | 6                | 0              | 4.131410                | 7.733354 | -3.007236 |
| 9                | 8                | 0              | -3.256258               | 7.400581 | -3.589773 |
| 10               | 6                | 0              | -0.766686               | 8.445274 | -4.206682 |
| 11               | 8                | 0              | 1.601479                | 0.438652 | -7.098216 |
| 12               | 6                | 0              | -1.321630               | 7.248955 | -4.953087 |
| 13               | 8                | 0              | 0.583744                | 6.459302 | 0.149237  |
| 14               | 6                | 0              | 2.662090                | 7.626962 | -2.655919 |
| 15               | 6                | 0              | 4.517095                | 4.358207 | -6.840563 |
| 16               | 8                | 0              | 6.035884                | 2.724828 | -4.946720 |
| 17               | 8                | 0              | 5.644371                | 5.977075 | -1.487379 |
| 18               | 8                | 0              | 6.615742                | 3.593794 | -2.382597 |
| 19               | 8                | 0              | -4.336053               | 5.060693 | -4.859628 |
| 20               | 6                | 0              | 2.272880                | 7.116080 | -1.400972 |
| 21               | 6                | 0              | -0.454765               | 4.900485 | -7.871578 |
| 22               | 6                | 0              | -0.061222               | 7.471959 | -1.979327 |
| 23               | 6                | 0              | 3.124349                | 3.786536 | -7.003002 |
| 24               | 6                | 0              | 1.670651                | 1.814220 | -7.126666 |
| 25               | 6                | 0              | 0.729873                | 4.053531 | -7.457026 |
| 26               | 6                | 0              | 2.952306                | 2.386434 | -6.972529 |
| 27               | 6                | 0              | 4.310595                | 6.002048 | -4.890403 |
| 28               | 6                | 0              | -3.107690               | 5.587930 | -5.202620 |
| 29               | 6                | 0              | 2.002642                | 4.591528 | -7.234795 |
| 30               | 6                | 0              | -1.153222               | 5.516185 | -6.680346 |
| 31               | 6                | 0              | -0.628207               | 6.617188 | -5.990800 |
| 32               | 6                | 0              | -2.582781               | 6.736573 | -4.586854 |
| 33               | 6                | 0              | 1.665955                | 8.026997 | -3.554621 |
| 34               | 6                | 0              | 4.775223                | 4.786688 | -5.410195 |
| 35               | 6                | 0              | -2.391706               | 4.992768 | -6.259617 |
| 36               | 6                | 0              | 0.569351                | 2.657437 | -7.358322 |
| 37               | 6                | 0              | 4.610043                | 6.418264 | -3.587492 |
| 38               | 6                | 0              | 5.541065                | 3.950633 | -4.574492 |
| 39               | 6                | 0              | 5.870725                | 4.342103 | -3.262579 |

|     |   |   |           |           |           |
|-----|---|---|-----------|-----------|-----------|
| 40  | 6 | 0 | 5.387769  | 5.570215  | -2.777594 |
| 41  | 6 | 0 | 4.454442  | 8.910268  | -3.932637 |
| 42  | 6 | 0 | -0.072135 | 5.959143  | -8.911638 |
| 43  | 6 | 0 | 4.804662  | 5.488932  | -7.833439 |
| 44  | 6 | 0 | -0.291929 | 9.541884  | -5.164258 |
| 45  | 1 | 0 | -3.796712 | 3.642636  | -6.541658 |
| 46  | 1 | 0 | -1.400702 | 2.688803  | -7.621650 |
| 47  | 1 | 0 | -2.043108 | 7.384050  | -2.260876 |
| 48  | 1 | 0 | 4.053112  | 6.430761  | -0.805877 |
| 49  | 1 | 0 | 3.852503  | 0.619118  | -6.870962 |
| 50  | 1 | 0 | 4.699219  | 7.923117  | -2.047530 |
| 51  | 1 | 0 | -4.152268 | 6.953012  | -3.380260 |
| 52  | 1 | 0 | -1.602923 | 8.900334  | -3.596131 |
| 53  | 1 | 0 | 0.642887  | 0.118421  | -7.094620 |
| 54  | 1 | 0 | -0.387464 | 6.653661  | 0.392254  |
| 55  | 1 | 0 | 5.248560  | 3.525274  | -7.085070 |
| 56  | 1 | 0 | 5.590157  | 2.386025  | -5.800329 |
| 57  | 1 | 0 | 6.136539  | 5.245077  | -0.969586 |
| 58  | 1 | 0 | 6.946173  | 2.731894  | -2.810179 |
| 59  | 1 | 0 | -4.353415 | 4.858849  | -3.849424 |
| 60  | 1 | 0 | -1.199773 | 4.209875  | -8.379478 |
| 61  | 1 | 0 | 3.694420  | 6.646099  | -5.519484 |
| 62  | 1 | 0 | 2.130484  | 5.674828  | -7.267694 |
| 63  | 1 | 0 | 0.353863  | 6.998947  | -6.276647 |
| 64  | 1 | 0 | 1.965268  | 8.399822  | -4.536284 |
| 65  | 1 | 0 | 5.537453  | 8.985459  | -4.096445 |
| 66  | 1 | 0 | 3.984772  | 8.817130  | -4.917226 |
| 67  | 1 | 0 | 4.119236  | 9.857986  | -3.493384 |
| 68  | 1 | 0 | 0.400203  | 5.495816  | -9.786903 |
| 69  | 1 | 0 | -0.961227 | 6.499899  | -9.260598 |
| 70  | 1 | 0 | 0.626503  | 6.704393  | -8.518450 |
| 71  | 1 | 0 | 4.155941  | 6.357942  | -7.684864 |
| 72  | 1 | 0 | 5.841357  | 5.836469  | -7.738532 |
| 73  | 1 | 0 | 4.663081  | 5.145883  | -8.866224 |
| 74  | 1 | 0 | 0.083064  | 10.411349 | -4.610256 |
| 75  | 1 | 0 | 0.506630  | 9.204835  | -5.832932 |
| 76  | 1 | 0 | -1.120917 | 9.885301  | -5.796987 |
| 77  | 6 | 0 | 4.994806  | 0.389092  | 6.651734  |
| 78  | 8 | 0 | 0.053211  | 4.535812  | 7.087851  |
| 79  | 8 | 0 | 0.893296  | 6.288048  | 5.018297  |
| 80  | 6 | 0 | 5.344310  | -1.129208 | 4.767761  |
| 81  | 8 | 0 | 3.656296  | -1.588032 | 6.436867  |
| 82  | 8 | 0 | 6.998042  | -0.778256 | 3.156574  |
| 83  | 8 | 0 | 4.350244  | 7.049626  | 1.705205  |
| 84  | 6 | 0 | 8.042496  | 1.580620  | 4.617515  |
| 85  | 8 | 0 | 1.543778  | 0.131211  | 8.163167  |
| 86  | 6 | 0 | 4.243530  | 0.744212  | 7.917255  |
| 87  | 8 | 0 | 1.561867  | 7.071213  | 2.465915  |
| 88  | 6 | 0 | 3.177699  | 1.789242  | 7.659488  |
| 89  | 8 | 0 | 4.942685  | -2.284445 | 4.126998  |
| 90  | 6 | 0 | 6.808363  | 0.811068  | 5.040772  |
| 91  | 6 | 0 | 6.367536  | 6.263464  | 3.444867  |
| 92  | 8 | 0 | 6.784126  | 5.514337  | 0.675902  |
| 93  | 8 | 0 | 8.539842  | 1.230352  | 1.910386  |
| 94  | 8 | 0 | 7.863807  | 3.013434  | -0.036963 |
| 95  | 8 | 0 | -0.500426 | 1.859088  | 7.640010  |
| 96  | 6 | 0 | 6.410541  | -0.329166 | 4.319502  |
| 97  | 6 | 0 | 2.761031  | 5.559301  | 6.974529  |
| 98  | 6 | 0 | 4.653546  | -0.785750 | 5.948082  |
| 99  | 6 | 0 | 4.914838  | 6.228189  | 3.859918  |
| 100 | 6 | 0 | 2.564979  | 6.631696  | 3.303459  |
| 101 | 6 | 0 | 3.177739  | 5.868649  | 5.554281  |
| 102 | 6 | 0 | 3.926436  | 6.639948  | 2.942194  |
| 103 | 6 | 0 | 7.133926  | 3.886620  | 3.980506  |
| 104 | 6 | 0 | 0.792206  | 2.348123  | 7.555095  |
| 105 | 6 | 0 | 4.513955  | 5.834367  | 5.141411  |
| 106 | 6 | 0 | 2.464374  | 4.087729  | 7.171767  |
| 107 | 6 | 0 | 3.466316  | 3.122639  | 7.341793  |
| 108 | 6 | 0 | 1.824276  | 1.415135  | 7.789416  |
| 109 | 6 | 0 | 6.059323  | 1.162453  | 6.172823  |
| 110 | 6 | 0 | 6.850105  | 4.885368  | 3.042021  |
| 111 | 6 | 0 | 1.118739  | 3.676110  | 7.245889  |
| 112 | 6 | 0 | 2.202072  | 6.253110  | 4.611299  |
| 113 | 6 | 0 | 7.687549  | 2.654965  | 3.610904  |
| 114 | 6 | 0 | 7.056075  | 4.605584  | 1.676554  |
| 115 | 6 | 0 | 7.602524  | 3.377320  | 1.267024  |
| 116 | 6 | 0 | 7.943510  | 2.422572  | 2.245967  |
| 117 | 6 | 0 | 8.823282  | 2.152481  | 5.805628  |

|     |   |   |           |           |           |
|-----|---|---|-----------|-----------|-----------|
| 118 | 6 | 0 | 3.767433  | 6.072238  | 8.010552  |
| 119 | 6 | 0 | 7.270080  | 6.886212  | 4.514827  |
| 120 | 6 | 0 | 5.184618  | 1.181728  | 9.046326  |
| 121 | 1 | 0 | 0.358693  | 5.409065  | 6.656110  |
| 122 | 1 | 0 | 0.276396  | 6.525251  | 4.246912  |
| 123 | 1 | 0 | 3.611660  | -2.465499 | 5.912824  |
| 124 | 1 | 0 | 7.596996  | -0.068602 | 2.726902  |
| 125 | 1 | 0 | 3.577656  | 7.426742  | 1.152075  |
| 126 | 1 | 0 | 8.739191  | 0.847197  | 4.108925  |
| 127 | 1 | 0 | 0.553994  | -0.042335 | 8.122292  |
| 128 | 1 | 0 | 3.722715  | -0.199720 | 8.269073  |
| 129 | 1 | 0 | 1.643378  | 6.635954  | 1.536520  |
| 130 | 1 | 0 | 5.539637  | -2.473593 | 3.319342  |
| 131 | 1 | 0 | 6.439764  | 6.936838  | 2.533197  |
| 132 | 1 | 0 | 6.181185  | 6.262826  | 1.024354  |
| 133 | 1 | 0 | 8.711588  | 1.168011  | 0.905963  |
| 134 | 1 | 0 | 7.621901  | 3.754526  | -0.677452 |
| 135 | 1 | 0 | -1.148392 | 2.620024  | 7.796884  |
| 136 | 1 | 0 | 1.796224  | 6.129810  | 7.159359  |
| 137 | 1 | 0 | 6.928385  | 4.076622  | 5.035321  |
| 138 | 1 | 0 | 5.275504  | 5.508789  | 5.853129  |
| 139 | 1 | 0 | 4.509359  | 3.423687  | 7.235305  |
| 140 | 1 | 0 | 6.331737  | 2.067376  | 6.719957  |
| 141 | 1 | 0 | 9.104376  | 1.356995  | 6.507323  |
| 142 | 1 | 0 | 9.747957  | 2.635508  | 5.464641  |
| 143 | 1 | 0 | 8.253656  | 2.899676  | 6.367432  |
| 144 | 1 | 0 | 4.737407  | 5.569737  | 7.940580  |
| 145 | 1 | 0 | 3.392560  | 5.909249  | 9.029138  |
| 146 | 1 | 0 | 3.942243  | 7.148177  | 7.888377  |
| 147 | 1 | 0 | 7.290485  | 6.303946  | 5.441606  |
| 148 | 1 | 0 | 6.929660  | 7.897540  | 4.770970  |
| 149 | 1 | 0 | 8.304551  | 6.963619  | 4.157201  |
| 150 | 1 | 0 | 5.947118  | 0.417276  | 9.237504  |
| 151 | 1 | 0 | 4.623930  | 1.329942  | 9.977912  |
| 152 | 1 | 0 | 5.702179  | 2.119899  | 8.826426  |
| 153 | 6 | 0 | 4.196781  | -4.768441 | -5.147033 |
| 154 | 8 | 0 | 3.960509  | -8.190510 | 0.342918  |
| 155 | 8 | 0 | 5.211013  | -6.294246 | 1.854718  |
| 156 | 6 | 0 | 3.156333  | -2.600101 | -5.565016 |
| 157 | 8 | 0 | 1.843682  | -4.645726 | -5.522959 |
| 158 | 8 | 0 | 4.400559  | -0.627929 | -5.655663 |
| 159 | 8 | 0 | 8.191351  | -2.588870 | 1.896852  |
| 160 | 6 | 0 | 6.932974  | -2.054791 | -5.206745 |
| 161 | 8 | 0 | 1.613942  | -7.057353 | -3.663427 |
| 162 | 6 | 0 | 4.061891  | -6.270901 | -5.027109 |
| 163 | 8 | 0 | 6.248741  | -4.108961 | 3.110477  |
| 164 | 6 | 0 | 4.040944  | -6.708457 | -3.577510 |
| 165 | 8 | 0 | 2.022442  | -1.869037 | -5.856784 |
| 166 | 6 | 0 | 5.582399  | -2.741660 | -5.224184 |
| 167 | 6 | 0 | 9.124296  | -3.049078 | -0.695506 |
| 168 | 8 | 0 | 8.154187  | -0.404907 | 0.123741  |
| 169 | 8 | 0 | 6.346940  | 0.495874  | -4.194514 |
| 170 | 8 | 0 | 6.800794  | 1.272029  | -1.654399 |
| 171 | 8 | 0 | 1.618230  | -8.038593 | -1.075679 |
| 172 | 6 | 0 | 4.420284  | -1.988652 | -5.465193 |
| 173 | 6 | 0 | 6.434280  | -7.391089 | -0.635537 |
| 174 | 6 | 0 | 3.046430  | -3.994298 | -5.412158 |
| 175 | 6 | 0 | 8.172888  | -4.012311 | -0.018229 |
| 176 | 6 | 0 | 6.695267  | -4.501722 | 1.862070  |
| 177 | 6 | 0 | 6.802344  | -6.053474 | -0.026259 |
| 178 | 6 | 0 | 7.678013  | -3.696431 | 1.263417  |
| 179 | 6 | 0 | 7.986717  | -2.517674 | -2.916178 |
| 180 | 6 | 0 | 2.765093  | -7.607219 | -1.686262 |
| 181 | 6 | 0 | 7.736127  | -5.195069 | -0.624637 |
| 182 | 6 | 0 | 5.190044  | -7.271781 | -1.488333 |
| 183 | 6 | 0 | 5.203138  | -6.778792 | -2.797787 |
| 184 | 6 | 0 | 2.814935  | -7.101955 | -3.004894 |
| 185 | 6 | 0 | 5.434823  | -4.123113 | -5.042540 |
| 186 | 6 | 0 | 8.329498  | -2.138388 | -1.611416 |
| 187 | 6 | 0 | 3.958083  | -7.686432 | -0.950058 |
| 188 | 6 | 0 | 6.230605  | -5.653647 | 1.196618  |
| 189 | 6 | 0 | 7.303828  | -1.663786 | -3.791437 |
| 190 | 6 | 0 | 7.914241  | -0.874479 | -1.148630 |
| 191 | 6 | 0 | 7.237187  | 0.013545  | -2.002255 |
| 192 | 6 | 0 | 6.949500  | -0.387779 | -3.319121 |
| 193 | 6 | 0 | 8.020937  | -2.889929 | -5.889625 |
| 194 | 6 | 0 | 7.592482  | -8.033675 | -1.406067 |
| 195 | 6 | 0 | 10.270168 | -3.759029 | -1.421418 |

|     |   |   |           |           |           |
|-----|---|---|-----------|-----------|-----------|
| 196 | 6 | 0 | 5.136205  | -7.015358 | -5.828211 |
| 197 | 1 | 0 | 3.011667  | -8.266649 | 0.678245  |
| 198 | 1 | 0 | 4.880099  | -7.134444 | 1.344683  |
| 199 | 1 | 0 | 1.088725  | -3.983572 | -5.694542 |
| 200 | 1 | 0 | 5.079940  | -0.157139 | -5.038817 |
| 201 | 1 | 0 | 7.760282  | -2.446811 | 2.808780  |
| 202 | 1 | 0 | 6.839256  | -1.102182 | -5.809747 |
| 203 | 1 | 0 | 1.641180  | -6.370888 | -4.409584 |
| 204 | 1 | 0 | 3.065802  | -6.556437 | -5.487387 |
| 205 | 1 | 0 | 5.573094  | -4.762553 | 3.461019  |
| 206 | 1 | 0 | 2.275273  | -0.877058 | -5.939779 |
| 207 | 1 | 0 | 9.602226  | -2.409773 | 0.105261  |
| 208 | 1 | 0 | 8.160167  | -1.168880 | 0.801925  |
| 209 | 1 | 0 | 5.944347  | 1.289007  | -3.696436 |
| 210 | 1 | 0 | 7.008041  | 1.478948  | -0.682243 |
| 211 | 1 | 0 | 0.814044  | -7.489412 | -1.443794 |
| 212 | 1 | 0 | 6.199697  | -8.093900 | 0.220747  |
| 213 | 1 | 0 | 8.264854  | -3.513147 | -3.265479 |
| 214 | 1 | 0 | 8.141562  | -5.460711 | -1.603859 |
| 215 | 1 | 0 | 6.148382  | -6.446438 | -3.227205 |
| 216 | 1 | 0 | 6.321190  | -4.721985 | -4.826638 |
| 217 | 1 | 0 | 7.741841  | -3.117274 | -6.926239 |
| 218 | 1 | 0 | 8.972139  | -2.343950 | -5.913665 |
| 219 | 1 | 0 | 8.202092  | -3.843854 | -5.383886 |
| 220 | 1 | 0 | 7.889776  | -7.452512 | -2.284998 |
| 221 | 1 | 0 | 8.476173  | -8.147639 | -0.766874 |
| 222 | 1 | 0 | 7.308157  | -9.033033 | -1.761682 |
| 223 | 1 | 0 | 9.921239  | -4.419882 | -2.221688 |
| 224 | 1 | 0 | 10.953091 | -3.029852 | -1.875664 |
| 225 | 1 | 0 | 10.853840 | -4.370389 | -0.721830 |
| 226 | 1 | 0 | 6.148107  | -6.820249 | -5.459999 |
| 227 | 1 | 0 | 4.974802  | -8.099595 | -5.777800 |
| 228 | 1 | 0 | 5.107581  | -6.722027 | -6.884697 |
| 229 | 6 | 0 | -5.724934 | -0.291577 | -6.328829 |
| 230 | 8 | 0 | -0.504585 | -3.545770 | -4.832144 |
| 231 | 8 | 0 | -1.395418 | -5.785244 | -3.428258 |
| 232 | 6 | 0 | -6.419725 | 1.515465  | -4.823993 |
| 233 | 8 | 0 | -4.560551 | 1.869056  | -6.199793 |
| 234 | 8 | 0 | -8.292373 | 1.282044  | -3.406357 |
| 235 | 8 | 0 | -5.473221 | -6.926595 | -1.019077 |
| 236 | 6 | 0 | -8.858696 | -1.392609 | -4.377175 |
| 237 | 8 | 0 | -2.321177 | 0.397242  | -6.787325 |
| 238 | 6 | 0 | -4.782710 | -0.789452 | -7.406931 |
| 239 | 8 | 0 | -2.817113 | -6.884699 | -1.005611 |
| 240 | 6 | 0 | -3.657890 | -1.582272 | -6.774379 |
| 241 | 8 | 0 | -6.270829 | 2.774644  | -4.273607 |
| 242 | 6 | 0 | -7.671141 | -0.587736 | -4.865089 |
| 243 | 6 | 0 | -7.105336 | -6.007216 | -3.099213 |
| 244 | 8 | 0 | -7.499919 | -5.163020 | -0.324690 |
| 245 | 8 | 0 | -9.122684 | -0.868709 | -1.649291 |
| 246 | 8 | 0 | -8.455543 | -2.660746 | 0.340565  |
| 247 | 8 | 0 | -0.276113 | -0.889809 | -5.511111 |
| 248 | 6 | 0 | -7.475867 | 0.712196  | -4.355637 |
| 249 | 6 | 0 | -2.794043 | -5.175542 | -5.715789 |
| 250 | 6 | 0 | -5.550275 | 1.004126  | -5.806355 |
| 251 | 6 | 0 | -5.596119 | -5.992156 | -3.210912 |
| 252 | 6 | 0 | -3.415101 | -6.393267 | -2.158513 |
| 253 | 6 | 0 | -3.526387 | -5.533986 | -4.441174 |
| 254 | 6 | 0 | -4.825038 | -6.436039 | -2.122752 |
| 255 | 6 | 0 | -7.918773 | -3.657736 | -3.677389 |
| 256 | 6 | 0 | -1.404393 | -1.617098 | -5.809576 |
| 257 | 6 | 0 | -4.921772 | -5.548589 | -4.356318 |
| 258 | 6 | 0 | -2.722457 | -3.676250 | -5.902807 |
| 259 | 6 | 0 | -3.762913 | -2.949807 | -6.495872 |
| 260 | 6 | 0 | -2.453477 | -0.929398 | -6.447844 |
| 261 | 6 | 0 | -6.777703 | -1.069330 | -5.828970 |
| 262 | 6 | 0 | -7.598926 | -4.625770 | -2.719162 |
| 263 | 6 | 0 | -1.561845 | -2.983745 | -5.510450 |
| 264 | 6 | 0 | -2.770340 | -5.914107 | -3.310292 |
| 265 | 6 | 0 | -8.436124 | -2.403665 | -3.333016 |
| 266 | 6 | 0 | -7.759872 | -4.297367 | -1.357948 |
| 267 | 6 | 0 | -8.246792 | -3.033278 | -0.972610 |
| 268 | 6 | 0 | -8.596275 | -2.096616 | -1.965980 |
| 269 | 6 | 0 | -9.628623 | -2.035526 | -5.535232 |
| 270 | 6 | 0 | -3.391423 | -5.884191 | -6.936487 |
| 271 | 6 | 0 | -7.780717 | -6.558896 | -4.356964 |
| 272 | 6 | 0 | -5.509444 | -1.566208 | -8.507711 |
| 273 | 1 | 0 | -0.754481 | -4.458594 | -4.434136 |

|     |   |   |            |           |           |
|-----|---|---|------------|-----------|-----------|
| 274 | 1 | 0 | -0.916081  | -6.112585 | -2.611991 |
| 275 | 1 | 0 | -3.780068  | 1.365383  | -6.635943 |
| 276 | 1 | 0 | -8.769898  | 0.563228  | -2.859221 |
| 277 | 1 | 0 | -4.800304  | -7.197722 | -0.280405 |
| 278 | 1 | 0 | -9.579691  | -0.674815 | -3.876516 |
| 279 | 1 | 0 | -1.450746  | 0.785850  | -6.423803 |
| 280 | 1 | 0 | -4.320913  | 0.115282  | -7.907378 |
| 281 | 1 | 0 | -1.840392  | -6.642057 | -0.962870 |
| 282 | 1 | 0 | -5.702077  | 3.355654  | -4.874969 |
| 283 | 1 | 0 | -7.379058  | -6.712043 | -2.254552 |
| 284 | 1 | 0 | -7.010869  | -5.999969 | -0.658444 |
| 285 | 1 | 0 | -9.201537  | -0.743831 | -0.644348 |
| 286 | 1 | 0 | -8.103092  | -3.373023 | 0.967303  |
| 287 | 1 | 0 | 0.427060   | -1.498987 | -5.062092 |
| 288 | 1 | 0 | -1.732065  | -5.560144 | -5.618035 |
| 289 | 1 | 0 | -7.775922  | -3.894432 | -4.733519 |
| 290 | 1 | 0 | -5.506943  | -5.212210 | -5.213820 |
| 291 | 1 | 0 | -4.685111  | -3.471079 | -6.758867 |
| 292 | 1 | 0 | -6.911699  | -2.082865 | -6.211418 |
| 293 | 1 | 0 | -9.024409  | -2.752423 | -6.100161 |
| 294 | 1 | 0 | -9.976449  | -1.272477 | -6.243065 |
| 295 | 1 | 0 | -10.511654 | -2.571993 | -5.164994 |
| 296 | 1 | 0 | -3.363473  | -6.973687 | -6.803147 |
| 297 | 1 | 0 | -2.820971  | -5.647628 | -7.843517 |
| 298 | 1 | 0 | -4.433381  | -5.606200 | -7.122433 |
| 299 | 1 | 0 | -7.442025  | -7.583187 | -4.560700 |
| 300 | 1 | 0 | -7.566150  | -5.962639 | -5.249651 |
| 301 | 1 | 0 | -8.870796  | -6.588279 | -4.234842 |
| 302 | 1 | 0 | -4.809266  | -1.868352 | -9.297375 |
| 303 | 1 | 0 | -6.286938  | -0.947331 | -8.973415 |
| 304 | 1 | 0 | -5.994469  | -2.474950 | -8.136659 |
| 305 | 6 | 0 | -4.636316  | 5.325163  | 5.514814  |
| 306 | 8 | 0 | -3.035994  | 8.246370  | -0.048869 |
| 307 | 8 | 0 | -4.243349  | 6.286633  | -1.692309 |
| 308 | 6 | 0 | -3.820932  | 3.147803  | 6.282689  |
| 309 | 8 | 0 | -2.365546  | 5.079598  | 6.219205  |
| 310 | 8 | 0 | -5.222686  | 1.265050  | 6.364616  |
| 311 | 8 | 0 | -7.117151  | 2.524499  | -1.551154 |
| 312 | 6 | 0 | -7.520487  | 2.765833  | 5.399682  |
| 313 | 8 | 0 | -1.586030  | 7.061256  | 4.350974  |
| 314 | 6 | 0 | -4.352245  | 6.793992  | 5.289897  |
| 315 | 8 | 0 | -4.866845  | 3.850127  | -2.516892 |
| 316 | 6 | 0 | -3.990714  | 7.061263  | 3.844026  |
| 317 | 8 | 0 | -2.759098  | 2.455014  | 6.805159  |
| 318 | 6 | 0 | -6.150255  | 3.393613  | 5.560787  |
| 319 | 6 | 0 | -8.758080  | 3.586834  | 0.523254  |
| 320 | 8 | 0 | -8.305954  | 0.721398  | 0.136180  |
| 321 | 8 | 0 | -7.270835  | 0.054789  | 4.756793  |
| 322 | 8 | 0 | -7.649391  | -0.955770 | 2.188095  |
| 323 | 8 | 0 | -1.003263  | 7.820528  | 1.721952  |
| 324 | 6 | 0 | -5.094093  | 2.598883  | 6.047613  |
| 325 | 6 | 0 | -5.705394  | 7.684084  | 0.451529  |
| 326 | 6 | 0 | -3.596613  | 4.509307  | 5.998794  |
| 327 | 6 | 0 | -7.567115  | 4.348432  | -0.016925 |
| 328 | 6 | 0 | -5.670136  | 4.425866  | -1.564849 |
| 329 | 6 | 0 | -6.081891  | 6.302711  | -0.050379 |
| 330 | 6 | 0 | -6.812013  | 3.779776  | -1.055626 |
| 331 | 6 | 0 | -8.069738  | 3.125530  | 2.937957  |
| 332 | 6 | 0 | -2.289723  | 7.612706  | 2.174310  |
| 333 | 6 | 0 | -7.171472  | 5.597163  | 0.478000  |
| 334 | 6 | 0 | -4.659402  | 7.556091  | 1.539606  |
| 335 | 6 | 0 | -4.971154  | 7.185008  | 2.852088  |
| 336 | 6 | 0 | -2.637588  | 7.225457  | 3.481339  |
| 337 | 6 | 0 | -5.890763  | 4.742598  | 5.288621  |
| 338 | 6 | 0 | -8.307933  | 2.664588  | 1.637049  |
| 339 | 6 | 0 | -3.311009  | 7.811539  | 1.225503  |
| 340 | 6 | 0 | -5.323620  | 5.701753  | -1.075080 |
| 341 | 6 | 0 | -7.724049  | 2.263624  | 3.985137  |
| 342 | 6 | 0 | -8.132525  | 1.294380  | 1.375306  |
| 343 | 6 | 0 | -7.782204  | 0.396376  | 2.402268  |
| 344 | 6 | 0 | -7.589626  | 0.886606  | 3.708144  |
| 345 | 6 | 0 | -8.648376  | 3.701949  | 5.844751  |
| 346 | 6 | 0 | -6.910847  | 8.510270  | 0.908664  |
| 347 | 6 | 0 | -9.907945  | 4.497984  | 0.961304  |
| 348 | 6 | 0 | -5.497960  | 7.691562  | 5.768628  |
| 349 | 1 | 0 | -2.030767  | 8.399667  | -0.179249 |
| 350 | 1 | 0 | -3.773686  | 6.963271  | -1.085389 |
| 351 | 1 | 0 | -1.667755  | 4.364153  | 6.430864  |

|     |   |   |            |           |           |
|-----|---|---|------------|-----------|-----------|
| 352 | 1 | 0 | -6.075756  | 0.865049  | 5.967229  |
| 353 | 1 | 0 | -7.422762  | 2.580610  | -2.529887 |
| 354 | 1 | 0 | -7.564619  | 1.866172  | 6.088821  |
| 355 | 1 | 0 | -1.883387  | 6.547347  | 5.185908  |
| 356 | 1 | 0 | -3.451677  | 7.062879  | 5.924102  |
| 357 | 1 | 0 | -5.232460  | 2.925267  | -2.777436 |
| 358 | 1 | 0 | -2.894363  | 1.442411  | 6.724137  |
| 359 | 1 | 0 | -9.157728  | 2.946038  | -0.318691 |
| 360 | 1 | 0 | -7.991335  | 1.361589  | -0.605141 |
| 361 | 1 | 0 | -7.191211  | -0.909597 | 4.449947  |
| 362 | 1 | 0 | -7.788347  | -1.166649 | 1.194614  |
| 363 | 1 | 0 | -0.336072  | 7.772129  | 2.479012  |
| 364 | 1 | 0 | -5.245626  | 8.249129  | -0.413955 |
| 365 | 1 | 0 | -8.163049  | 4.193016  | 3.143780  |
| 366 | 1 | 0 | -7.740305  | 6.042261  | 1.296079  |
| 367 | 1 | 0 | -6.013484  | 6.992279  | 3.111990  |
| 368 | 1 | 0 | -6.696335  | 5.366240  | 4.898391  |
| 369 | 1 | 0 | -8.504719  | 4.018824  | 6.885438  |
| 370 | 1 | 0 | -8.713933  | 4.606740  | 5.232135  |
| 371 | 1 | 0 | -9.620107  | 3.195253  | 5.782956  |
| 372 | 1 | 0 | -7.646117  | 8.612137  | 0.100907  |
| 373 | 1 | 0 | -7.424637  | 8.070798  | 1.769891  |
| 374 | 1 | 0 | -6.596340  | 9.521123  | 1.199849  |
| 375 | 1 | 0 | -10.243272 | 5.132568  | 0.131750  |
| 376 | 1 | 0 | -10.768717 | 3.902744  | 1.292922  |
| 377 | 1 | 0 | -9.633348  | 5.157609  | 1.791005  |
| 378 | 1 | 0 | -6.429793  | 7.516950  | 5.221446  |
| 379 | 1 | 0 | -5.706137  | 7.521675  | 6.832690  |
| 380 | 1 | 0 | -5.240911  | 8.751208  | 5.645266  |
| 381 | 6 | 0 | -1.029930  | -8.163118 | 3.319199  |
| 382 | 8 | 0 | 2.534320   | -2.882596 | 4.501680  |
| 383 | 8 | 0 | 0.686779   | -0.804364 | 6.068470  |
| 384 | 6 | 0 | -2.228809  | -8.614823 | 1.220531  |
| 385 | 8 | 0 | 0.178262   | -8.862410 | 1.382616  |
| 386 | 8 | 0 | -4.581481  | -8.362043 | 1.075875  |
| 387 | 8 | 0 | -4.035685  | -0.844233 | 6.361311  |
| 388 | 6 | 0 | -4.804996  | -7.696513 | 3.889705  |
| 389 | 8 | 0 | 1.949230   | -6.855611 | 1.967097  |
| 390 | 6 | 0 | 0.285715   | -8.109842 | 4.067356  |
| 391 | 8 | 0 | -1.720686  | 0.472859  | 5.826469  |
| 392 | 6 | 0 | 0.810032   | -6.690162 | 4.146711  |
| 393 | 8 | 0 | -2.088754  | -9.025450 | -0.076959 |
| 394 | 6 | 0 | -3.468291  | -7.950251 | 3.222966  |
| 395 | 6 | 0 | -4.235566  | -3.572829 | 6.827237  |
| 396 | 8 | 0 | -5.703325  | -2.133242 | 4.672435  |
| 397 | 8 | 0 | -6.093747  | -6.062411 | 2.029799  |
| 398 | 8 | 0 | -6.487171  | -3.351666 | 2.384763  |
| 399 | 8 | 0 | 3.099708   | -4.418451 | 2.271013  |
| 400 | 6 | 0 | -3.442488  | -8.295890 | 1.857505  |
| 401 | 6 | 0 | 0.881949   | -3.705932 | 6.588675  |
| 402 | 6 | 0 | -1.033984  | -8.542648 | 1.965228  |
| 403 | 6 | 0 | -2.886192  | -2.922128 | 6.597119  |
| 404 | 6 | 0 | -1.633073  | -0.865703 | 6.135812  |
| 405 | 6 | 0 | -0.434684  | -2.969897 | 6.468386  |
| 406 | 6 | 0 | -2.845162  | -1.536418 | 6.350976  |
| 407 | 6 | 0 | -4.519459  | -5.587929 | 5.296101  |
| 408 | 6 | 0 | 2.248195   | -4.928832 | 3.236847  |
| 409 | 6 | 0 | -1.670831  | -3.614363 | 6.630258  |
| 410 | 6 | 0 | 1.124205   | -4.587110 | 5.382203  |
| 411 | 6 | 0 | 0.551483   | -5.856885 | 5.243918  |
| 412 | 6 | 0 | 1.635411   | -6.193215 | 3.117738  |
| 413 | 6 | 0 | -2.258790  | -7.866803 | 3.922224  |
| 414 | 6 | 0 | -4.721507  | -4.225114 | 5.549583  |
| 415 | 6 | 0 | 1.987437   | -4.131426 | 4.364326  |
| 416 | 6 | 0 | -0.422576  | -1.585484 | 6.210302  |
| 417 | 6 | 0 | -4.989371  | -6.217124 | 4.138817  |
| 418 | 6 | 0 | -5.403605  | -3.467585 | 4.577720  |
| 419 | 6 | 0 | -5.853605  | -4.060452 | 3.380196  |
| 420 | 6 | 0 | -5.652410  | -5.436716 | 3.170610  |
| 421 | 6 | 0 | -4.981243  | -8.546491 | 5.150551  |
| 422 | 6 | 0 | 0.980789   | -4.482379 | 7.905411  |
| 423 | 6 | 0 | -4.211429  | -4.525829 | 8.026072  |
| 424 | 6 | 0 | 0.185970   | -8.782936 | 5.440507  |
| 425 | 1 | 0 | 3.230261   | -2.692667 | 3.771410  |
| 426 | 1 | 0 | 1.562193   | -1.323051 | 6.173576  |
| 427 | 1 | 0 | 0.078047   | -8.962989 | 0.376172  |
| 428 | 1 | 0 | -5.379085  | -7.985499 | 1.593640  |
| 429 | 1 | 0 | -3.904306  | 0.129818  | 6.057582  |

|     |   |   |           |           |           |
|-----|---|---|-----------|-----------|-----------|
| 430 | 1 | 0 | -5.623345 | -8.016467 | 3.168602  |
| 431 | 1 | 0 | 1.265401  | -7.597605 | 1.741861  |
| 432 | 1 | 0 | 1.040433  | -8.713603 | 3.477909  |
| 433 | 1 | 0 | -0.850939 | 0.961029  | 6.075103  |
| 434 | 1 | 0 | -2.879033 | -8.722940 | -0.638652 |
| 435 | 1 | 0 | -4.973238 | -2.755854 | 7.091067  |
| 436 | 1 | 0 | -5.160489 | -1.663640 | 5.406965  |
| 437 | 1 | 0 | -6.531011 | -5.394493 | 1.404926  |
| 438 | 1 | 0 | -6.462679 | -2.356837 | 2.605745  |
| 439 | 1 | 0 | 3.649193  | -5.186949 | 1.871094  |
| 440 | 1 | 0 | 1.708250  | -2.923791 | 6.611498  |
| 441 | 1 | 0 | -3.982801 | -6.186937 | 6.034745  |
| 442 | 1 | 0 | -1.684474 | -4.692371 | 6.797996  |
| 443 | 1 | 0 | -0.112923 | -6.218583 | 6.032330  |
| 444 | 1 | 0 | -2.273563 | -7.563672 | 4.969710  |
| 445 | 1 | 0 | -5.961470 | -8.367539 | 5.609940  |
| 446 | 1 | 0 | -4.914525 | -9.615888 | 4.912431  |
| 447 | 1 | 0 | -4.219767 | -8.338217 | 5.909411  |
| 448 | 1 | 0 | 0.892663  | -3.805090 | 8.764792  |
| 449 | 1 | 0 | 0.197104  | -5.239345 | 8.009593  |
| 450 | 1 | 0 | 1.947050  | -4.995158 | 7.987984  |
| 451 | 1 | 0 | -3.915430 | -3.990917 | 8.937901  |
| 452 | 1 | 0 | -5.204830 | -4.956441 | 8.203697  |
| 453 | 1 | 0 | -3.509708 | -5.355636 | 7.894221  |
| 454 | 1 | 0 | 1.156665  | -8.776385 | 5.951531  |
| 455 | 1 | 0 | -0.539290 | -8.296419 | 6.100391  |
| 456 | 1 | 0 | -0.124069 | -9.830944 | 5.333950  |
| 457 | 1 | 0 | 2.238062  | 2.992873  | -4.065025 |
| 458 | 1 | 0 | 0.748804  | 1.058366  | -4.582804 |
| 459 | 1 | 0 | 1.115973  | -1.123217 | -3.476049 |
| 460 | 1 | 0 | 5.540156  | -3.824390 | -1.110562 |
| 461 | 1 | 0 | 4.163187  | -4.097435 | -2.221995 |
| 462 | 1 | 0 | 3.871906  | -4.051090 | -0.470425 |
| 463 | 1 | 0 | 2.371539  | -2.541049 | -2.066318 |
| 464 | 1 | 0 | 3.268029  | -0.408841 | 2.480400  |
| 465 | 1 | 0 | 4.993616  | -0.365654 | 2.032204  |
| 466 | 1 | 0 | 3.801474  | 0.555614  | 1.074820  |
| 467 | 1 | 0 | 3.885052  | -2.508741 | 1.315608  |
| 468 | 1 | 0 | 1.895335  | -0.657503 | 0.062130  |
| 469 | 1 | 0 | 2.042016  | -3.611238 | 0.852226  |
| 470 | 1 | 0 | -2.333109 | -3.420537 | 0.661647  |
| 471 | 1 | 0 | -2.311572 | -4.707823 | -0.567434 |
| 472 | 1 | 0 | -0.230085 | -4.563744 | 1.187345  |
| 473 | 1 | 0 | -0.883798 | -1.131311 | 0.046202  |
| 474 | 6 | 0 | -1.596715 | -2.731078 | -1.268187 |
| 475 | 6 | 0 | -0.484992 | -1.867911 | -0.671052 |
| 476 | 7 | 0 | 0.334010  | -2.837954 | 0.086612  |
| 477 | 8 | 0 | 4.790726  | -1.527838 | -0.277500 |
| 478 | 6 | 0 | 2.939493  | -1.750315 | -1.556929 |
| 479 | 6 | 0 | 2.397567  | 2.028886  | -3.577401 |
| 480 | 6 | 0 | 0.358000  | -5.089374 | -0.842016 |
| 481 | 8 | 0 | 1.403015  | -4.722374 | -1.362961 |
| 482 | 6 | 0 | 2.791543  | -0.436072 | -2.293493 |
| 483 | 8 | 0 | -0.262206 | -6.185536 | -1.035674 |
| 484 | 6 | 0 | 1.589403  | -2.746363 | 0.333587  |
| 485 | 6 | 0 | 2.446396  | -1.603603 | -0.046003 |
| 486 | 6 | 0 | 3.779573  | -1.573251 | 0.730222  |
| 487 | 7 | 0 | 4.319945  | -2.179050 | -1.429123 |
| 488 | 6 | 0 | 4.477986  | -3.616495 | -1.288036 |
| 489 | 6 | 0 | 3.444781  | 1.865067  | -2.669050 |
| 490 | 1 | 0 | -1.277268 | -3.187730 | -2.216254 |
| 491 | 6 | 0 | -0.347082 | -4.143945 | 0.175593  |
| 492 | 6 | 0 | -1.787555 | -3.818697 | -0.209570 |
| 493 | 6 | 0 | 1.562123  | 0.952161  | -3.860920 |
| 494 | 6 | 0 | 1.763240  | -0.274724 | -3.224753 |
| 495 | 6 | 0 | 3.646135  | 0.643370  | -2.033465 |
| 496 | 1 | 0 | 0.137016  | -1.339787 | -1.403697 |
| 497 | 1 | 0 | -2.503115 | -2.140775 | -1.456144 |
| 498 | 6 | 0 | 3.969234  | -0.375588 | 1.633733  |
| 499 | 1 | 0 | 4.105719  | 2.703087  | -2.437922 |
| 500 | 1 | 0 | 4.477210  | 0.516057  | -1.335655 |

MC1a@CP<sub>6R-out</sub>

| Center<br>Number | Atomic<br>Number | Atomic<br>Type | Coordinates (Angstroms) |   |   |
|------------------|------------------|----------------|-------------------------|---|---|
|                  |                  |                | X                       | Y | Z |

|    |   |   |           |           |           |
|----|---|---|-----------|-----------|-----------|
| 1  | 6 | 0 | 7.099046  | 2.294175  | -5.279960 |
| 2  | 8 | 0 | 8.663098  | 3.573213  | 0.832920  |
| 3  | 8 | 0 | 6.299607  | 5.117809  | 1.161666  |
| 4  | 6 | 0 | 5.038731  | 1.112462  | -5.890472 |
| 5  | 8 | 0 | 6.737621  | -0.103345 | -4.829698 |
| 6  | 8 | 0 | 3.315714  | 2.198520  | -7.063264 |
| 7  | 8 | 0 | 2.922678  | 7.590446  | -1.100643 |
| 8  | 6 | 0 | 4.734195  | 4.734324  | -7.092098 |
| 9  | 8 | 0 | 8.680894  | 0.320327  | -2.759521 |
| 10 | 6 | 0 | 8.500080  | 2.260283  | -4.707713 |
| 11 | 8 | 0 | 3.734375  | 6.090753  | 1.036612  |
| 12 | 6 | 0 | 8.487907  | 2.627791  | -3.238726 |
| 13 | 8 | 0 | 4.237031  | -0.005358 | -5.936714 |
| 14 | 6 | 0 | 5.293470  | 3.493266  | -6.427094 |
| 15 | 6 | 0 | 4.515829  | 8.159532  | -3.314996 |
| 16 | 8 | 0 | 1.629330  | 7.938668  | -3.536281 |
| 17 | 8 | 0 | 1.940304  | 4.699439  | -7.048336 |
| 18 | 8 | 0 | 0.405646  | 6.182219  | -5.327907 |
| 19 | 8 | 0 | 8.722870  | 0.937738  | 0.084376  |
| 20 | 6 | 0 | 4.539249  | 2.302955  | -6.458191 |
| 21 | 6 | 0 | 8.307293  | 5.705710  | -0.927555 |
| 22 | 6 | 0 | 6.323710  | 1.119347  | -5.311241 |
| 23 | 6 | 0 | 5.057904  | 7.372905  | -2.141751 |
| 24 | 6 | 0 | 4.650452  | 6.332511  | 0.036628  |
| 25 | 6 | 0 | 6.864536  | 6.162998  | -1.000843 |
| 26 | 6 | 0 | 4.198966  | 7.093032  | -1.059589 |
| 27 | 6 | 0 | 4.571744  | 6.399097  | -5.164898 |
| 28 | 6 | 0 | 8.678391  | 1.898871  | -0.912953 |
| 29 | 6 | 0 | 6.370849  | 6.893224  | -2.089838 |
| 30 | 6 | 0 | 8.426333  | 4.281245  | -1.426734 |
| 31 | 6 | 0 | 8.370176  | 3.945543  | -2.787091 |
| 32 | 6 | 0 | 8.609075  | 1.592871  | -2.282642 |
| 33 | 6 | 0 | 6.550775  | 3.467001  | -5.815276 |
| 34 | 6 | 0 | 3.844166  | 7.215760  | -4.292615 |
| 35 | 6 | 0 | 8.597388  | 3.240345  | -0.496250 |
| 36 | 6 | 0 | 5.978788  | 5.865054  | 0.052910  |
| 37 | 6 | 0 | 3.946760  | 5.564192  | -6.099577 |
| 38 | 6 | 0 | 2.437591  | 7.152688  | -4.330472 |
| 39 | 6 | 0 | 1.774582  | 6.305677  | -5.235340 |
| 40 | 6 | 0 | 2.538438  | 5.520483  | -6.123464 |
| 41 | 6 | 0 | 5.810825  | 5.563151  | -7.800395 |
| 42 | 6 | 0 | 9.278162  | 6.642090  | -1.653844 |
| 43 | 6 | 0 | 5.563927  | 9.040417  | -3.998612 |
| 44 | 6 | 0 | 9.483924  | 3.128560  | -5.500182 |
| 45 | 1 | 0 | 8.749345  | 2.732556  | 1.419761  |
| 46 | 1 | 0 | 7.188160  | 4.627607  | 1.059069  |
| 47 | 1 | 0 | 7.459214  | -0.004049 | -4.110307 |
| 48 | 1 | 0 | 2.862130  | 3.103943  | -7.176060 |
| 49 | 1 | 0 | 2.375713  | 7.271728  | -0.298925 |
| 50 | 1 | 0 | 4.016587  | 4.392129  | -7.899572 |
| 51 | 1 | 0 | 8.637256  | -0.396736 | -2.005708 |
| 52 | 1 | 0 | 8.877789  | 1.196698  | -4.795379 |
| 53 | 1 | 0 | 4.086361  | 5.373314  | 1.669904  |
| 54 | 1 | 0 | 4.787456  | -0.847274 | -5.753615 |
| 55 | 1 | 0 | 3.722875  | 8.860114  | -2.904334 |
| 56 | 1 | 0 | 2.161319  | 8.303370  | -2.742898 |
| 57 | 1 | 0 | 0.925629  | 4.689142  | -6.934468 |
| 58 | 1 | 0 | -0.049338 | 6.905475  | -4.780804 |
| 59 | 1 | 0 | 9.547478  | 0.374513  | 0.009147  |
| 60 | 1 | 0 | 8.610619  | 5.721150  | 0.162420  |
| 61 | 1 | 0 | 5.661724  | 6.416351  | -5.119322 |
| 62 | 1 | 0 | 7.037724  | 7.102215  | -2.928719 |
| 63 | 1 | 0 | 8.226287  | 4.744006  | -3.518372 |
| 64 | 1 | 0 | 7.134222  | 4.388113  | -5.771954 |
| 65 | 1 | 0 | 5.359359  | 6.411278  | -8.330725 |
| 66 | 1 | 0 | 6.554425  | 5.970820  | -7.108368 |
| 67 | 1 | 0 | 6.346401  | 4.955296  | -8.540237 |
| 68 | 1 | 0 | 9.199082  | 7.665616  | -1.267113 |
| 69 | 1 | 0 | 10.314476 | 6.311413  | -1.507389 |
| 70 | 1 | 0 | 9.100890  | 6.681056  | -2.733436 |
| 71 | 1 | 0 | 5.106993  | 9.638301  | -4.797718 |
| 72 | 1 | 0 | 6.019974  | 9.735033  | -3.282374 |
| 73 | 1 | 0 | 6.371466  | 8.458069  | -4.454536 |
| 74 | 1 | 0 | 9.235038  | 4.193694  | -5.462058 |
| 75 | 1 | 0 | 10.502043 | 3.016940  | -5.106701 |
| 76 | 1 | 0 | 9.501571  | 2.832421  | -6.556466 |
| 77 | 6 | 0 | -5.692184 | -2.105652 | -4.716428 |



|     |   |   |           |           |            |
|-----|---|---|-----------|-----------|------------|
| 78  | 8 | 0 | -0.811286 | -6.078670 | -5.890575  |
| 79  | 8 | 0 | 0.917351  | -4.028366 | -6.397207  |
| 80  | 6 | 0 | -5.596103 | -0.746298 | -2.684051  |
| 81  | 8 | 0 | -5.771628 | -3.067482 | -2.443838  |
| 82  | 8 | 0 | -5.384916 | 1.649899  | -2.882564  |
| 83  | 8 | 0 | 1.483847  | 0.724976  | -7.077182  |
| 84  | 6 | 0 | -5.361019 | 1.623490  | -5.672593  |
| 85  | 8 | 0 | -4.985483 | -5.476554 | -3.625356  |
| 86  | 6 | 0 | -5.857365 | -3.468941 | -5.355782  |
| 87  | 8 | 0 | 2.449363  | -1.780237 | -6.015602  |
| 88  | 6 | 0 | -4.505498 | -4.131308 | -5.528870  |
| 89  | 8 | 0 | -5.630410 | -0.574929 | -1.318051  |
| 90  | 6 | 0 | -5.468562 | 0.339312  | -4.874950  |
| 91  | 6 | 0 | -1.000386 | 1.012722  | -8.258284  |
| 92  | 8 | 0 | 0.099545  | 3.079599  | -6.471615  |
| 93  | 8 | 0 | -4.078105 | 3.668095  | -4.256310  |
| 94  | 8 | 0 | -1.424333 | 4.300224  | -4.536058  |
| 95  | 8 | 0 | -2.519616 | -6.704698 | -3.795782  |
| 96  | 6 | 0 | -5.479643 | 0.423374  | -3.465844  |
| 97  | 6 | 0 | -1.461852 | -4.066678 | -7.879250  |
| 98  | 6 | 0 | -5.681967 | -1.998462 | -3.314020  |
| 99  | 6 | 0 | -0.498955 | -0.343776 | -7.810740  |
| 100 | 6 | 0 | 1.235504  | -1.647515 | -6.672562  |
| 101 | 6 | 0 | -0.734073 | -2.775349 | -7.583501  |
| 102 | 6 | 0 | 0.762931  | -0.425752 | -7.180359  |
| 103 | 6 | 0 | -3.135471 | 1.322234  | -6.893830  |
| 104 | 6 | 0 | -2.839516 | -5.751125 | -4.737561  |
| 105 | 6 | 0 | -1.219179 | -1.526291 | -7.995762  |
| 106 | 6 | 0 | -2.395982 | -4.409144 | -6.738260  |
| 107 | 6 | 0 | -3.630748 | -3.775834 | -6.562385  |
| 108 | 6 | 0 | -4.099054 | -5.132390 | -4.624780  |
| 109 | 6 | 0 | -5.563899 | -0.926654 | -5.465412  |
| 110 | 6 | 0 | -1.801292 | 1.666111  | -7.150378  |
| 111 | 6 | 0 | -2.005069 | -5.394490 | -5.812365  |
| 112 | 6 | 0 | 0.480654  | -2.820662 | -6.871505  |
| 113 | 6 | 0 | -3.909444 | 1.975200  | -5.926948  |
| 114 | 6 | 0 | -1.210293 | 2.663048  | -6.351648  |
| 115 | 6 | 0 | -1.952667 | 3.334717  | -5.367423  |
| 116 | 6 | 0 | -3.310663 | 3.003002  | -5.167927  |
| 117 | 6 | 0 | -6.171068 | 1.585124  | -6.973484  |
| 118 | 6 | 0 | -2.182177 | -4.061613 | -9.229762  |
| 119 | 6 | 0 | -1.786074 | 0.953928  | -9.572647  |
| 120 | 6 | 0 | -6.637503 | -3.422104 | -6.674168  |
| 121 | 1 | 0 | -0.223785 | -5.687241 | -6.633425  |
| 122 | 1 | 0 | 1.827950  | -3.921925 | -5.915953  |
| 123 | 1 | 0 | -5.396316 | -3.925424 | -2.849866  |
| 124 | 1 | 0 | -5.292143 | 1.567530  | -1.861501  |
| 125 | 1 | 0 | 2.470393  | 0.570474  | -6.833760  |
| 126 | 1 | 0 | -5.800880 | 2.447692  | -5.032939  |
| 127 | 1 | 0 | -4.602346 | -6.202112 | -3.026818  |
| 128 | 1 | 0 | -6.467788 | -4.105476 | -4.648780  |
| 129 | 1 | 0 | 2.590197  | -1.006921 | -5.386878  |
| 130 | 1 | 0 | -5.544330 | -1.468091 | -0.861569  |
| 131 | 1 | 0 | -0.091883 | 1.657051  | -8.458142  |
| 132 | 1 | 0 | 0.703246  | 2.309803  | -6.754432  |
| 133 | 1 | 0 | -3.520093 | 4.327965  | -3.718320  |
| 134 | 1 | 0 | -0.455727 | 4.494717  | -4.776117  |
| 135 | 1 | 0 | -1.509648 | -6.883144 | -3.798514  |
| 136 | 1 | 0 | -0.671501 | -4.881567 | -7.938242  |
| 137 | 1 | 0 | -3.590326 | 0.516591  | -7.471364  |
| 138 | 1 | 0 | -2.189984 | -1.478552 | -8.493723  |
| 139 | 1 | 0 | -3.921380 | -2.980293 | -7.250642  |
| 140 | 1 | 0 | -5.541655 | -0.996916 | -6.554033  |
| 141 | 1 | 0 | -7.223842 | 1.359275  | -6.773290  |
| 142 | 1 | 0 | -6.127242 | 2.557456  | -7.480330  |
| 143 | 1 | 0 | -5.798193 | 0.836540  | -7.679461  |
| 144 | 1 | 0 | -1.483275 | -3.836674 | -10.045287 |
| 145 | 1 | 0 | -2.986982 | -3.320147 | -9.274683  |
| 146 | 1 | 0 | -2.632576 | -5.040564 | -9.435958  |
| 147 | 1 | 0 | -2.702699 | 0.361564  | -9.490828  |
| 148 | 1 | 0 | -1.176498 | 0.516137  | -10.372183 |
| 149 | 1 | 0 | -2.079717 | 1.962120  | -9.891580  |
| 150 | 1 | 0 | -7.624137 | -2.967304 | -6.528592  |
| 151 | 1 | 0 | -6.789027 | -4.434073 | -7.070185  |
| 152 | 1 | 0 | -6.121130 | -2.844853 | -7.448575  |
| 153 | 6 | 0 | -1.268601 | 7.617932  | 3.787943   |
| 154 | 8 | 0 | -5.272171 | 2.548338  | 4.508152   |
| 155 | 8 | 0 | -6.396327 | 2.351121  | 1.935756   |

|     |   |   |           |           |           |
|-----|---|---|-----------|-----------|-----------|
| 156 | 6 | 0 | 0.953302  | 7.654708  | 2.749359  |
| 157 | 8 | 0 | 0.600777  | 6.837181  | 5.017435  |
| 158 | 8 | 0 | 1.267028  | 8.475027  | 0.561941  |
| 159 | 8 | 0 | -6.244749 | 4.531806  | -2.281993 |
| 160 | 6 | 0 | -1.511583 | 9.327989  | 0.355006  |
| 161 | 8 | 0 | -1.108265 | 4.583626  | 5.655913  |
| 162 | 6 | 0 | -2.120530 | 7.269834  | 4.989555  |
| 163 | 8 | 0 | -6.510593 | 2.239411  | -0.764928 |
| 164 | 6 | 0 | -2.902854 | 5.996660  | 4.744774  |
| 165 | 8 | 0 | 2.297218  | 7.402476  | 2.918776  |
| 166 | 6 | 0 | -0.979521 | 8.558392  | 1.546023  |
| 167 | 6 | 0 | -5.831588 | 7.071079  | -1.185957 |
| 168 | 8 | 0 | -4.217066 | 6.015511  | -3.405082 |
| 169 | 8 | 0 | -0.258498 | 8.131382  | -1.828379 |
| 170 | 8 | 0 | -1.561242 | 6.598257  | -3.691437 |
| 171 | 8 | 0 | -2.715746 | 2.333803  | 5.474650  |
| 172 | 6 | 0 | 0.390318  | 8.231238  | 1.595867  |
| 173 | 6 | 0 | -6.339459 | 4.889957  | 3.418342  |
| 174 | 6 | 0 | 0.116367  | 7.366858  | 3.845118  |
| 175 | 6 | 0 | -6.028131 | 5.857628  | -0.301691 |
| 176 | 6 | 0 | -6.321386 | 3.439800  | -0.117458 |
| 177 | 6 | 0 | -6.217340 | 4.808582  | 1.910591  |
| 178 | 6 | 0 | -6.182825 | 4.591942  | -0.905398 |
| 179 | 6 | 0 | -3.638421 | 8.142118  | -0.426903 |
| 180 | 6 | 0 | -3.142764 | 3.577959  | 5.063044  |
| 181 | 6 | 0 | -6.050993 | 5.936668  | 1.095576  |
| 182 | 6 | 0 | -4.964216 | 4.864182  | 4.049309  |
| 183 | 6 | 0 | -4.175746 | 6.013812  | 4.161300  |
| 184 | 6 | 0 | -2.372579 | 4.754512  | 5.143714  |
| 185 | 6 | 0 | -1.791349 | 8.205027  | 2.630260  |
| 186 | 6 | 0 | -4.350252 | 7.351953  | -1.338122 |
| 187 | 6 | 0 | -4.449786 | 3.647739  | 4.542257  |
| 188 | 6 | 0 | -6.297394 | 3.547789  | 1.290258  |
| 189 | 6 | 0 | -2.277161 | 8.426328  | -0.586242 |
| 190 | 6 | 0 | -3.654269 | 6.807708  | -2.434189 |
| 191 | 6 | 0 | -2.284097 | 7.071621  | -2.625114 |
| 192 | 6 | 0 | -1.598448 | 7.865473  | -1.686158 |
| 193 | 6 | 0 | -2.324273 | 10.551726 | 0.790911  |
| 194 | 6 | 0 | -7.173798 | 6.089238  | 3.877718  |
| 195 | 6 | 0 | -6.617686 | 8.291926  | -0.699768 |
| 196 | 6 | 0 | -3.017082 | 8.440701  | 5.407812  |
| 197 | 1 | 0 | -4.801159 | 1.717487  | 4.851239  |
| 198 | 1 | 0 | -6.265491 | 2.445083  | 2.941636  |
| 199 | 1 | 0 | 1.612691  | 6.747743  | 4.998746  |
| 200 | 1 | 0 | 0.753959  | 8.724838  | -0.289696 |
| 201 | 1 | 0 | -6.051400 | 3.589389  | -2.619806 |
| 202 | 1 | 0 | -0.618499 | 9.726535  | -0.221982 |
| 203 | 1 | 0 | -0.515432 | 5.397600  | 5.493876  |
| 204 | 1 | 0 | -1.426357 | 7.078115  | 5.863686  |
| 205 | 1 | 0 | -6.659291 | 1.481507  | -0.065353 |
| 206 | 1 | 0 | 2.800836  | 7.472330  | 2.037664  |
| 207 | 1 | 0 | -6.238016 | 6.816264  | -2.211779 |
| 208 | 1 | 0 | -5.150098 | 5.684105  | -3.131364 |
| 209 | 1 | 0 | 0.140340  | 7.566380  | -2.582945 |
| 210 | 1 | 0 | -2.107753 | 5.916575  | -4.228965 |
| 211 | 1 | 0 | -1.821910 | 2.393117  | 5.949009  |
| 212 | 1 | 0 | -6.893734 | 3.964301  | 3.766617  |
| 213 | 1 | 0 | -4.164727 | 8.555928  | 0.434327  |
| 214 | 1 | 0 | -5.937892 | 6.913660  | 1.568090  |
| 215 | 1 | 0 | -4.573649 | 6.960244  | 3.790513  |
| 216 | 1 | 0 | -2.862734 | 8.403486  | 2.575547  |
| 217 | 1 | 0 | -1.718104 | 11.220352 | 1.414861  |
| 218 | 1 | 0 | -2.663082 | 11.124726 | -0.081262 |
| 219 | 1 | 0 | -3.212443 | 10.282531 | 1.371505  |
| 220 | 1 | 0 | -8.181055 | 6.049671  | 3.444702  |
| 221 | 1 | 0 | -7.282321 | 6.089767  | 4.969769  |
| 222 | 1 | 0 | -6.730030 | 7.048088  | 3.592132  |
| 223 | 1 | 0 | -6.309061 | 8.621287  | 0.298059  |
| 224 | 1 | 0 | -6.478541 | 9.140581  | -1.381216 |
| 225 | 1 | 0 | -7.690737 | 8.071378  | -0.654222 |
| 226 | 1 | 0 | -2.410657 | 9.320444  | 5.658380  |
| 227 | 1 | 0 | -3.715447 | 8.741209  | 4.620336  |
| 228 | 1 | 0 | -3.610000 | 8.181907  | 6.293759  |
| 229 | 6 | 0 | 7.563563  | 1.788887  | 5.133449  |
| 230 | 8 | 0 | 2.219093  | 5.092093  | 5.551420  |
| 231 | 8 | 0 | 0.484616  | 3.572424  | 7.212090  |
| 232 | 6 | 0 | 7.544471  | 0.178883  | 3.280394  |
| 233 | 8 | 0 | 7.554361  | 2.447791  | 2.751476  |

|     |   |   |           |           |           |
|-----|---|---|-----------|-----------|-----------|
| 234 | 8 | 0 | 7.613628  | -2.133936 | 3.642181  |
| 235 | 8 | 0 | 0.388166  | -1.194168 | 8.102640  |
| 236 | 6 | 0 | 7.523457  | -1.788155 | 6.563360  |
| 237 | 8 | 0 | 6.573406  | 4.890862  | 3.623866  |
| 238 | 6 | 0 | 7.601426  | 3.227592  | 5.610756  |
| 239 | 8 | 0 | -0.919825 | 1.182936  | 7.113119  |
| 240 | 6 | 0 | 6.186730  | 3.765366  | 5.690383  |
| 241 | 8 | 0 | 7.519895  | -0.124950 | 1.939557  |
| 242 | 6 | 0 | 7.547475  | -0.626497 | 5.589040  |
| 243 | 6 | 0 | 3.041847  | -1.201455 | 8.974845  |
| 244 | 8 | 0 | 2.060846  | -3.272561 | 7.159702  |
| 245 | 8 | 0 | 6.394944  | -4.000287 | 5.308414  |
| 246 | 8 | 0 | 3.719479  | -4.685725 | 5.512038  |
| 247 | 8 | 0 | 3.935828  | 5.664354  | 3.493108  |
| 248 | 6 | 0 | 7.562397  | -0.886490 | 4.202629  |
| 249 | 6 | 0 | 3.131759  | 3.799930  | 8.030093  |
| 250 | 6 | 0 | 7.554031  | 1.505425  | 3.755632  |
| 251 | 6 | 0 | 2.382386  | 0.051796  | 8.442081  |
| 252 | 6 | 0 | 0.398799  | 1.166308  | 7.525573  |
| 253 | 6 | 0 | 2.429799  | 2.460688  | 7.994769  |
| 254 | 6 | 0 | 1.040478  | 0.010299  | 8.010150  |
| 255 | 6 | 0 | 5.256050  | -1.495184 | 7.714311  |
| 256 | 6 | 0 | 4.349452  | 4.958219  | 4.595814  |
| 257 | 6 | 0 | 3.057475  | 1.276583  | 8.395146  |
| 258 | 6 | 0 | 4.014343  | 3.969961  | 6.811582  |
| 259 | 6 | 0 | 5.333601  | 3.497699  | 6.766831  |
| 260 | 6 | 0 | 5.694106  | 4.550369  | 4.629103  |
| 261 | 6 | 0 | 7.534773  | 0.705527  | 6.021246  |
| 262 | 6 | 0 | 3.914948  | -1.847661 | 7.919513  |
| 263 | 6 | 0 | 3.514469  | 4.651881  | 5.687748  |
| 264 | 6 | 0 | 1.090890  | 2.391836  | 7.561638  |
| 265 | 6 | 0 | 6.082990  | -2.185450 | 6.820101  |
| 266 | 6 | 0 | 3.376917  | -2.880130 | 7.130983  |
| 267 | 6 | 0 | 4.184952  | -3.616815 | 6.244818  |
| 268 | 6 | 0 | 5.544043  | -3.281071 | 6.113899  |
| 269 | 6 | 0 | 8.291388  | -1.509892 | 7.857743  |
| 270 | 6 | 0 | 3.899583  | 4.015094  | 9.338899  |
| 271 | 6 | 0 | 3.805715  | -0.941259 | 10.277969 |
| 272 | 6 | 0 | 8.363715  | 3.406730  | 6.926612  |
| 273 | 1 | 0 | 1.577847  | 4.587054  | 6.164036  |
| 274 | 1 | 0 | -0.481632 | 3.421969  | 6.927689  |
| 275 | 1 | 0 | 7.210617  | 3.358160  | 3.069523  |
| 276 | 1 | 0 | 7.396110  | -2.868398 | 4.315504  |
| 277 | 1 | 0 | -0.575066 | -1.132579 | 7.762580  |
| 278 | 1 | 0 | 8.042493  | -2.663030 | 6.066837  |
| 279 | 1 | 0 | 6.118897  | 5.491328  | 2.930525  |
| 280 | 1 | 0 | 8.161736  | 3.830951  | 4.835594  |
| 281 | 1 | 0 | -1.110434 | 0.406120  | 6.467299  |
| 282 | 1 | 0 | 7.384285  | 0.727727  | 1.404801  |
| 283 | 1 | 0 | 2.219059  | -1.935579 | 9.233057  |
| 284 | 1 | 0 | 1.456788  | -2.559441 | 7.571491  |
| 285 | 1 | 0 | 5.897553  | -4.728027 | 4.797315  |
| 286 | 1 | 0 | 2.708790  | -4.795640 | 5.646828  |
| 287 | 1 | 0 | 2.931430  | 5.870115  | 3.550499  |
| 288 | 1 | 0 | 2.337636  | 4.605906  | 7.994442  |
| 289 | 1 | 0 | 5.673167  | -0.656743 | 8.274134  |
| 290 | 1 | 0 | 4.105749  | 1.312424  | 8.699110  |
| 291 | 1 | 0 | 5.711775  | 2.906568  | 7.602159  |
| 292 | 1 | 0 | 7.508110  | 0.907372  | 7.093670  |
| 293 | 1 | 0 | 9.336012  | -1.251484 | 7.644004  |
| 294 | 1 | 0 | 8.293606  | -2.396814 | 8.504258  |
| 295 | 1 | 0 | 7.860687  | -0.686405 | 8.436726  |
| 296 | 1 | 0 | 3.222672  | 3.949896  | 10.200184 |
| 297 | 1 | 0 | 4.366865  | 5.007698  | 9.357581  |
| 298 | 1 | 0 | 4.693459  | 3.277125  | 9.491254  |
| 299 | 1 | 0 | 4.233903  | -1.872026 | 10.670702 |
| 300 | 1 | 0 | 3.135875  | -0.533313 | 11.045478 |
| 301 | 1 | 0 | 4.628716  | -0.230661 | 10.152053 |
| 302 | 1 | 0 | 7.894605  | 2.878595  | 7.763132  |
| 303 | 1 | 0 | 8.417137  | 4.468327  | 7.200211  |
| 304 | 1 | 0 | 9.391844  | 3.034843  | 6.836153  |
| 305 | 6 | 0 | 3.228260  | -7.254566 | -3.973031 |
| 306 | 8 | 0 | 7.385908  | -2.571673 | -5.391349 |
| 307 | 8 | 0 | 8.543485  | -2.039026 | -2.964196 |
| 308 | 6 | 0 | 1.177823  | -6.762421 | -2.736760 |
| 309 | 8 | 0 | 1.501202  | -5.965866 | -5.001930 |
| 310 | 8 | 0 | 0.869770  | -7.427735 | -0.530413 |
| 311 | 8 | 0 | 7.942271  | -3.364953 | 1.577672  |

|     |   |   |           |            |           |
|-----|---|---|-----------|------------|-----------|
| 312 | 6 | 0 | 3.527781  | -8.734692  | -0.430062 |
| 313 | 8 | 0 | 3.294216  | -4.709666  | -6.634458 |
| 314 | 6 | 0 | 4.011890  | -7.167520  | -5.264399 |
| 315 | 8 | 0 | 8.449534  | -1.345566  | -0.427967 |
| 316 | 6 | 0 | 4.900198  | -5.940816  | -5.249542 |
| 317 | 8 | 0 | -0.077978 | -6.190277  | -2.745343 |
| 318 | 6 | 0 | 2.987389  | -8.014083  | -1.649688 |
| 319 | 6 | 0 | 7.651235  | -6.045803  | 0.967332  |
| 320 | 8 | 0 | 5.872737  | -4.769289  | 2.937689  |
| 321 | 8 | 0 | 2.236475  | -7.617593  | 1.779977  |
| 322 | 8 | 0 | 3.269909  | -5.623705  | 3.308134  |
| 323 | 8 | 0 | 4.919033  | -2.455671  | -6.595480 |
| 324 | 6 | 0 | 1.708145  | -7.427027  | -1.613436 |
| 325 | 6 | 0 | 8.321440  | -4.774982  | -3.939960 |
| 326 | 6 | 0 | 1.953233  | -6.654836  | -3.906261 |
| 327 | 6 | 0 | 7.856749  | -5.014593  | -0.120348 |
| 328 | 6 | 0 | 8.221179  | -2.677721  | -0.740902 |
| 329 | 6 | 0 | 8.170162  | -4.409865  | -2.477997 |
| 330 | 6 | 0 | 8.009997  | -3.657754  | 0.243966  |
| 331 | 6 | 0 | 5.560289  | -7.338599  | 0.281605  |
| 332 | 6 | 0 | 5.271127  | -3.622700  | -5.954307 |
| 333 | 6 | 0 | 7.924208  | -5.356044  | -1.475712 |
| 334 | 6 | 0 | 6.968007  | -4.788998  | -4.620424 |
| 335 | 6 | 0 | 6.129884  | -5.909794  | -4.583758 |
| 336 | 6 | 0 | 4.476888  | -4.783898  | -5.931012 |
| 337 | 6 | 0 | 3.723046  | -7.904548  | -2.837037 |
| 338 | 6 | 0 | 6.182695  | -6.390898  | 1.106435  |
| 339 | 6 | 0 | 6.529225  | -3.645698  | -5.318788 |
| 340 | 6 | 0 | 8.299727  | -3.060091  | -2.095240 |
| 341 | 6 | 0 | 4.232041  | -7.738784  | 0.470150  |
| 342 | 6 | 0 | 5.415287  | -5.766636  | 2.108172  |
| 343 | 6 | 0 | 4.083354  | -6.160300  | 2.340867  |
| 344 | 6 | 0 | 3.516894  | -7.163522  | 1.536047  |
| 345 | 6 | 0 | 4.416541  | -9.930652  | -0.782236 |
| 346 | 6 | 0 | 9.092027  | -6.082813  | -4.143062 |
| 347 | 6 | 0 | 8.518334  | -7.292277  | 0.757301  |
| 348 | 6 | 0 | 4.792840  | -8.445243  | -5.580693 |
| 349 | 1 | 0 | 6.924736  | -1.747160  | -5.768493 |
| 350 | 1 | 0 | 8.377847  | -2.306689  | -3.939184 |
| 351 | 1 | 0 | 0.558028  | -5.581585  | -4.828426 |
| 352 | 1 | 0 | 1.370379  | -7.583585  | 0.355977  |
| 353 | 1 | 0 | 8.039406  | -2.366540  | 1.778689  |
| 354 | 1 | 0 | 2.645230  | -9.153114  | 0.139772  |
| 355 | 1 | 0 | 2.746275  | -5.565992  | -6.506895 |
| 356 | 1 | 0 | 3.255409  | -7.036660  | -6.102372 |
| 357 | 1 | 0 | 7.641723  | -0.950935  | 0.026357  |
| 358 | 1 | 0 | -0.452031 | -6.165963  | -1.795865 |
| 359 | 1 | 0 | 7.991443  | -5.586403  | 1.944242  |
| 360 | 1 | 0 | 6.615068  | -4.219476  | 2.496279  |
| 361 | 1 | 0 | 1.771620  | -7.038168  | 2.486726  |
| 362 | 1 | 0 | 3.719153  | -4.801838  | 3.733142  |
| 363 | 1 | 0 | 3.947652  | -2.498919  | -6.911102 |
| 364 | 1 | 0 | 8.939232  | -3.962493  | -4.432393 |
| 365 | 1 | 0 | 6.131823  | -7.783362  | -0.534308 |
| 366 | 1 | 0 | 7.791882  | -6.402054  | -1.760631 |
| 367 | 1 | 0 | 6.449727  | -6.790128  | -4.024027 |
| 368 | 1 | 0 | 4.721036  | -8.345238  | -2.879452 |
| 369 | 1 | 0 | 3.872666  | -10.650725 | -1.406251 |
| 370 | 1 | 0 | 5.321128  | -9.640330  | -1.326560 |
| 371 | 1 | 0 | 4.737235  | -10.455010 | 0.127145  |
| 372 | 1 | 0 | 9.235003  | -6.287635  | -5.211665 |
| 373 | 1 | 0 | 10.085089 | -6.025057  | -3.679865 |
| 374 | 1 | 0 | 8.579208  | -6.947911  | -3.710675 |
| 375 | 1 | 0 | 8.282353  | -7.822440  | -0.170582 |
| 376 | 1 | 0 | 9.581183  | -7.021929  | 0.719094  |
| 377 | 1 | 0 | 8.385615  | -8.002574  | 1.582935  |
| 378 | 1 | 0 | 5.297079  | -8.364385  | -6.551911 |
| 379 | 1 | 0 | 5.563393  | -8.663952  | -4.833851 |
| 380 | 1 | 0 | 4.122448  | -9.312863  | -5.623351 |
| 381 | 6 | 0 | -5.130710 | -2.442184  | 5.158675  |
| 382 | 8 | 0 | -7.073783 | -4.243114  | -0.653421 |
| 383 | 8 | 0 | -4.805812 | -5.884788  | -1.170321 |
| 384 | 6 | 0 | -3.009339 | -1.227892  | 5.346541  |
| 385 | 8 | 0 | -4.814516 | -0.153323  | 4.301455  |
| 386 | 8 | 0 | -1.137530 | -2.164812  | 6.415335  |
| 387 | 8 | 0 | -1.099437 | -8.066003  | 0.889936  |
| 388 | 6 | 0 | -2.591855 | -4.668260  | 6.997067  |
| 389 | 8 | 0 | -7.290931 | -0.743150  | 2.739690  |

|     |   |   |            |           |           |
|-----|---|---|------------|-----------|-----------|
| 390 | 6 | 0 | -6.584277  | -2.472609 | 4.737326  |
| 391 | 8 | 0 | -2.220248  | -6.821840 | -1.287043 |
| 392 | 6 | 0 | -6.701551  | -2.962521 | 3.308083  |
| 393 | 8 | 0 | -2.196519  | -0.141688 | 5.128187  |
| 394 | 6 | 0 | -3.201885  | -3.501097 | 6.247940  |
| 395 | 6 | 0 | -2.341344  | -8.278514 | 3.376205  |
| 396 | 8 | 0 | 0.535146   | -7.898197 | 3.485643  |
| 397 | 8 | 0 | 0.158090   | -4.739348 | 7.065826  |
| 398 | 8 | 0 | 1.734936   | -6.283293 | 5.415575  |
| 399 | 8 | 0 | -7.521661  | -1.685552 | -0.135684 |
| 400 | 6 | 0 | -2.445061  | -2.335603 | 6.013388  |
| 401 | 6 | 0 | -6.471983  | -6.205517 | 1.240525  |
| 402 | 6 | 0 | -4.355899  | -1.289958 | 4.926327  |
| 403 | 6 | 0 | -3.035865  | -7.624358 | 2.204666  |
| 404 | 6 | 0 | -2.967308  | -6.904160 | -0.135144 |
| 405 | 6 | 0 | -5.010117  | -6.591509 | 1.180756  |
| 406 | 6 | 0 | -2.356187  | -7.526138 | 0.973781  |
| 407 | 6 | 0 | -2.433462  | -6.411817 | 5.124077  |
| 408 | 6 | 0 | -7.177324  | -2.458040 | 0.969153  |
| 409 | 6 | 0 | -4.346543  | -7.142059 | 2.283520  |
| 410 | 6 | 0 | -6.629117  | -4.753854 | 1.636355  |
| 411 | 6 | 0 | -6.483294  | -4.297043 | 2.953912  |
| 412 | 6 | 0 | -7.055770  | -2.031693 | 2.304094  |
| 413 | 6 | 0 | -4.525293  | -3.532823 | 5.793666  |
| 414 | 6 | 0 | -1.693395  | -7.251061 | 4.281756  |
| 415 | 6 | 0 | -6.948775  | -3.810982 | 0.646450  |
| 416 | 6 | 0 | -4.292704  | -6.442623 | -0.022609 |
| 417 | 6 | 0 | -1.816603  | -5.561903 | 6.049558  |
| 418 | 6 | 0 | -0.287671  | -7.171190 | 4.319099  |
| 419 | 6 | 0 | 0.368553   | -6.341515 | 5.246067  |
| 420 | 6 | 0 | -0.409310  | -5.556356 | 6.118821  |
| 421 | 6 | 0 | -3.614935  | -5.473954 | 7.805078  |
| 422 | 6 | 0 | -7.296722  | -7.128268 | 2.144943  |
| 423 | 6 | 0 | -3.264278  | -9.210364 | 4.168587  |
| 424 | 6 | 0 | -7.470054  | -3.287463 | 5.685804  |
| 425 | 1 | 0 | -7.086701  | -3.440885 | -1.303027 |
| 426 | 1 | 0 | -5.658155  | -5.349921 | -0.988114 |
| 427 | 1 | 0 | -5.675945  | -0.322574 | 3.782354  |
| 428 | 1 | 0 | -0.668055  | -3.052119 | 6.568247  |
| 429 | 1 | 0 | -0.766412  | -8.047607 | -0.078282 |
| 430 | 1 | 0 | -1.865118  | -4.239941 | 7.751863  |
| 431 | 1 | 0 | -7.610800  | -0.112113 | 1.993035  |
| 432 | 1 | 0 | -6.971740  | -1.408720 | 4.779719  |
| 433 | 1 | 0 | -2.761050  | -6.391562 | -2.039172 |
| 434 | 1 | 0 | -2.703675  | 0.598566  | 4.651164  |
| 435 | 1 | 0 | -1.516098  | -8.932008 | 2.946712  |
| 436 | 1 | 0 | -0.008544  | -8.337971 | 2.739217  |
| 437 | 1 | 0 | 1.164435   | -4.879772 | 7.120049  |
| 438 | 1 | 0 | 2.223800   | -6.678501 | 4.619120  |
| 439 | 1 | 0 | -7.488374  | -0.716777 | 0.098100  |
| 440 | 1 | 0 | -6.893912  | -6.328038 | 0.197056  |
| 441 | 1 | 0 | -3.522494  | -6.424144 | 5.061830  |
| 442 | 1 | 0 | -4.877653  | -7.220286 | 3.233653  |
| 443 | 1 | 0 | -6.188821  | -5.008616 | 3.727731  |
| 444 | 1 | 0 | -5.113759  | -4.438365 | 5.953777  |
| 445 | 1 | 0 | -4.352900  | -5.976866 | 7.172082  |
| 446 | 1 | 0 | -3.111762  | -6.250891 | 8.395593  |
| 447 | 1 | 0 | -4.159599  | -4.827962 | 8.504565  |
| 448 | 1 | 0 | -7.184935  | -8.176121 | 1.838640  |
| 449 | 1 | 0 | -7.003484  | -7.060851 | 3.197537  |
| 450 | 1 | 0 | -8.362947  | -6.877894 | 2.086616  |
| 451 | 1 | 0 | -4.082975  | -8.674093 | 4.659078  |
| 452 | 1 | 0 | -3.711646  | -9.967569 | 3.512734  |
| 453 | 1 | 0 | -2.706668  | -9.736821 | 4.953572  |
| 454 | 1 | 0 | -7.370158  | -2.927593 | 6.717947  |
| 455 | 1 | 0 | -8.526069  | -3.194060 | 5.405475  |
| 456 | 1 | 0 | -7.224669  | -4.354244 | 5.683174  |
| 457 | 1 | 0 | -15.606148 | 2.182689  | -0.695401 |
| 458 | 1 | 0 | -13.955064 | 3.181251  | 0.887137  |
| 459 | 1 | 0 | -12.116248 | 1.777866  | 1.809827  |
| 460 | 1 | 0 | -10.591917 | -3.212420 | 2.738226  |
| 461 | 1 | 0 | -9.533210  | -1.797808 | 2.316066  |
| 462 | 1 | 0 | -9.670186  | -3.211059 | 1.210580  |
| 463 | 1 | 0 | -10.935571 | -0.172656 | 2.021249  |
| 464 | 1 | 0 | -11.681633 | -4.199162 | -1.559848 |
| 465 | 1 | 0 | -12.234706 | -3.220506 | -2.955913 |
| 466 | 1 | 0 | -10.695589 | -4.138472 | -3.035024 |
| 467 | 1 | 0 | -9.714766  | -2.627132 | -1.212944 |

|     |   |   |            |           |           |
|-----|---|---|------------|-----------|-----------|
| 468 | 1 | 0 | -11.812355 | -0.793479 | -2.533791 |
| 469 | 1 | 0 | -9.291417  | -0.497587 | -0.681833 |
| 470 | 1 | 0 | -9.797008  | 4.275106  | -0.376084 |
| 471 | 1 | 0 | -11.060796 | 3.267743  | 0.372181  |
| 472 | 1 | 0 | -8.576980  | 2.309500  | -1.127693 |
| 473 | 1 | 0 | -11.386159 | 1.509371  | -3.083742 |
| 474 | 6 | 0 | -11.159251 | 3.304026  | -1.813097 |
| 475 | 6 | 0 | -11.420270 | 1.812399  | -2.027713 |
| 476 | 7 | 0 | -10.326064 | 1.148803  | -1.293383 |
| 477 | 8 | 0 | -11.998183 | -2.814242 | 0.509572  |
| 478 | 6 | 0 | -11.614861 | -0.729153 | 1.376113  |
| 479 | 6 | 0 | -14.803230 | 1.570964  | -0.280511 |
| 480 | 6 | 0 | -9.095830  | 1.525815  | 0.831185  |
| 481 | 8 | 0 | -9.790342  | 1.756200  | 1.809041  |
| 482 | 6 | 0 | -12.741345 | -0.014673 | 0.786945  |
| 483 | 8 | 0 | -8.068179  | 0.765586  | 0.769770  |
| 484 | 6 | 0 | -10.131475 | -0.131308 | -1.278364 |
| 485 | 6 | 0 | -10.935285 | -1.098289 | -1.959072 |
| 486 | 6 | 0 | -10.614341 | -2.403414 | -1.800986 |
| 487 | 7 | 0 | -11.347625 | -2.000981 | 1.219892  |
| 488 | 6 | 0 | -10.200694 | -2.577784 | 1.934272  |
| 489 | 6 | 0 | -14.702070 | 0.220999  | -0.621296 |
| 490 | 1 | 0 | -12.095377 | 3.875863  | -1.792540 |
| 491 | 6 | 0 | -9.497412  | 2.128202  | -0.536746 |
| 492 | 6 | 0 | -10.389291 | 3.358226  | -0.491397 |
| 493 | 6 | 0 | -13.878769 | 2.129352  | 0.605219  |
| 494 | 6 | 0 | -12.856992 | 1.346490  | 1.133767  |
| 495 | 6 | 0 | -13.685875 | -0.576049 | -0.095045 |
| 496 | 1 | 0 | -12.378229 | 1.485137  | -1.595487 |
| 497 | 1 | 0 | -10.537859 | 3.698302  | -2.631546 |
| 498 | 6 | 0 | -11.357430 | -3.546694 | -2.383627 |
| 499 | 1 | 0 | -15.431095 | -0.222876 | -1.301714 |
| 500 | 1 | 0 | -13.607120 | -1.630256 | -0.349301 |

### TS2a@CP<sub>6R</sub>-out

| Center Number | Atomic Number | Atomic Type | Coordinates (Angstroms) |           |           |
|---------------|---------------|-------------|-------------------------|-----------|-----------|
|               |               |             | X                       | Y         | Z         |
| 1             | 6             | 0           | 7.374832                | 2.174321  | -5.043137 |
| 2             | 8             | 0           | 8.842664                | 3.134381  | 1.151047  |
| 3             | 8             | 0           | 6.545717                | 4.776220  | 1.481552  |
| 4             | 6             | 0           | 5.272750                | 1.124770  | -5.745785 |
| 5             | 8             | 0           | 6.881635                | -0.216827 | -4.696039 |
| 6             | 8             | 0           | 3.635928                | 2.342270  | -6.911899 |
| 7             | 8             | 0           | 3.354735                | 7.502748  | -0.758576 |
| 8             | 6             | 0           | 5.183275                | 4.800284  | -6.812740 |
| 9             | 8             | 0           | 8.794245                | 0.026084  | -2.567189 |
| 10            | 6             | 0           | 8.757313                | 2.046573  | -4.439964 |
| 11            | 8             | 0           | 4.034965                | 5.879018  | 1.333457  |
| 12            | 6             | 0           | 8.725898                | 2.357114  | -2.958127 |
| 13            | 8             | 0           | 4.416183                | 0.052845  | -5.853643 |
| 14            | 6             | 0           | 5.661609                | 3.507811  | -6.183490 |
| 15            | 6             | 0           | 5.032083                | 8.081518  | -2.906861 |
| 16            | 8             | 0           | 2.145066                | 8.015714  | -3.209710 |
| 17            | 8             | 0           | 2.391751                | 4.906580  | -6.842620 |
| 18            | 8             | 0           | 0.885634                | 6.396274  | -5.103046 |
| 19            | 8             | 0           | 8.793774                | 0.530583  | 0.299920  |
| 20            | 6             | 0           | 4.848326                | 2.360435  | -6.277377 |
| 21            | 6             | 0           | 8.635088                | 5.348325  | -0.530758 |
| 22            | 6             | 0           | 6.541831                | 1.043138  | -5.138162 |
| 23            | 6             | 0           | 5.503987                | 7.222169  | -1.754479 |
| 24            | 6             | 0           | 4.988234                | 6.115504  | 0.367529  |
| 25            | 6             | 0           | 7.218637                | 5.878968  | -0.620720 |
| 26            | 6             | 0           | 4.603638                | 6.941389  | -0.706702 |
| 27            | 6             | 0           | 5.051194                | 6.395123  | -4.825020 |
| 28            | 6             | 0           | 8.821315                | 1.530107  | -0.659487 |
| 29            | 6             | 0           | 6.790237                | 6.676315  | -1.690145 |
| 30            | 6             | 0           | 8.698131                | 3.940144  | -1.083532 |
| 31            | 6             | 0           | 8.660539                | 3.660596  | -2.457173 |
| 32            | 6             | 0           | 8.772123                | 1.281224  | -2.041553 |
| 33            | 6             | 0           | 6.900461                | 3.393290  | -5.544754 |
| 34            | 6             | 0           | 4.341332                | 7.212567  | -3.938982 |
| 35            | 6             | 0           | 8.794894                | 2.856816  | -0.191612 |
| 36            | 6             | 0           | 6.291485                | 5.582745  | 0.397280  |
| 37            | 6             | 0           | 4.411318                | 5.630346  | -5.808301 |

|     |   |   |           |           |           |
|-----|---|---|-----------|-----------|-----------|
| 38  | 6 | 0 | 2.934918  | 7.222355  | -4.015001 |
| 39  | 6 | 0 | 2.255639  | 6.446452  | -4.970235 |
| 40  | 6 | 0 | 3.003731  | 5.659117  | -5.869873 |
| 41  | 6 | 0 | 6.318603  | 5.600128  | -7.460150 |
| 42  | 6 | 0 | 9.669078  | 6.262860  | -1.195187 |
| 43  | 6 | 0 | 6.139592  | 8.935956  | -3.527553 |
| 44  | 6 | 0 | 9.803616  | 2.893497  | -5.173378 |
| 45  | 1 | 0 | 8.873735  | 2.268501  | 1.705626  |
| 46  | 1 | 0 | 7.412705  | 4.248479  | 1.381725  |
| 47  | 1 | 0 | 7.589293  | -0.182270 | -3.957246 |
| 48  | 1 | 0 | 3.232691  | 3.273858  | -7.003138 |
| 49  | 1 | 0 | 2.771265  | 7.178983  | 0.015020  |
| 50  | 1 | 0 | 4.471877  | 4.526059  | -7.651059 |
| 51  | 1 | 0 | 8.693188  | -0.716381 | -1.844311 |
| 52  | 1 | 0 | 9.083205  | 0.969258  | -4.561220 |
| 53  | 1 | 0 | 4.333258  | 5.118348  | 1.943043  |
| 54  | 1 | 0 | 4.918054  | -0.822953 | -5.692115 |
| 55  | 1 | 0 | 4.263652  | 8.803550  | -2.486862 |
| 56  | 1 | 0 | 2.672394  | 8.321039  | -2.388853 |
| 57  | 1 | 0 | 1.374753  | 4.938720  | -6.752842 |
| 58  | 1 | 0 | 0.450737  | 7.113228  | -4.531533 |
| 59  | 1 | 0 | 9.587835  | -0.073989 | 0.217662  |
| 60  | 1 | 0 | 8.910006  | 5.306480  | 0.566024  |
| 61  | 1 | 0 | 6.138968  | 6.355133  | -4.751014 |
| 62  | 1 | 0 | 7.488606  | 6.885760  | -2.502863 |
| 63  | 1 | 0 | 8.573832  | 4.492873  | -3.159179 |
| 64  | 1 | 0 | 7.528759  | 4.280640  | -5.452324 |
| 65  | 1 | 0 | 5.924160  | 6.489563  | -7.967786 |
| 66  | 1 | 0 | 7.062087  | 5.943065  | -6.733764 |
| 67  | 1 | 0 | 6.843465  | 4.994700  | -8.209545 |
| 68  | 1 | 0 | 9.629595  | 7.273296  | -0.769940 |
| 69  | 1 | 0 | 10.683854 | 5.875738  | -1.036919 |
| 70  | 1 | 0 | 9.522216  | 6.352248  | -2.276358 |
| 71  | 1 | 0 | 5.733406  | 9.587632  | -4.311867 |
| 72  | 1 | 0 | 6.610112  | 9.577345  | -2.772174 |
| 73  | 1 | 0 | 6.929212  | 8.332829  | -3.987820 |
| 74  | 1 | 0 | 9.607645  | 3.967676  | -5.098171 |
| 75  | 1 | 0 | 10.804386 | 2.714488  | -4.760847 |
| 76  | 1 | 0 | 9.833179  | 2.638348  | -6.240032 |
| 77  | 6 | 0 | -5.634519 | -1.576670 | -4.943909 |
| 78  | 8 | 0 | -0.935714 | -5.753447 | -6.151774 |
| 79  | 8 | 0 | 0.905884  | -3.776217 | -6.539433 |
| 80  | 6 | 0 | -5.503513 | -0.287870 | -2.867706 |
| 81  | 8 | 0 | -5.824688 | -2.603075 | -2.706863 |
| 82  | 8 | 0 | -5.142030 | 2.097401  | -2.990111 |
| 83  | 8 | 0 | 1.741753  | 0.958652  | -7.053019 |
| 84  | 6 | 0 | -5.086321 | 2.156244  | -5.775588 |
| 85  | 8 | 0 | -5.129133 | -5.024905 | -3.960379 |
| 86  | 6 | 0 | -5.855515 | -2.909541 | -5.628727 |
| 87  | 8 | 0 | 2.544217  | -1.626218 | -6.046877 |
| 88  | 6 | 0 | -4.534845 | -3.633673 | -5.796908 |
| 89  | 8 | 0 | -5.548030 | -0.152666 | -1.499579 |
| 90  | 6 | 0 | -5.273559 | 0.854985  | -5.021679 |
| 91  | 6 | 0 | -0.695654 | 1.418142  | -8.274000 |
| 92  | 8 | 0 | 0.460834  | 3.356414  | -6.380545 |
| 93  | 8 | 0 | -3.742186 | 4.079504  | -4.252442 |
| 94  | 8 | 0 | -1.051333 | 4.581840  | -4.438140 |
| 95  | 8 | 0 | -2.724639 | -6.371471 | -4.123269 |
| 96  | 6 | 0 | -5.304014 | 0.896204  | -3.611401 |
| 97  | 6 | 0 | -1.436017 | -3.638731 | -8.075598 |
| 98  | 6 | 0 | -5.650028 | -1.512896 | -3.538456 |
| 99  | 6 | 0 | -0.277830 | 0.022520  | -7.862017 |
| 100 | 6 | 0 | 1.355777  | -1.408251 | -6.727671 |
| 101 | 6 | 0 | -0.648468 | -2.398715 | -7.719472 |
| 102 | 6 | 0 | 0.962332  | -0.147546 | -7.206710 |
| 103 | 6 | 0 | -2.848314 | 1.790073  | -6.954760 |
| 104 | 6 | 0 | -2.972813 | -5.366021 | -5.032832 |
| 105 | 6 | 0 | -1.056020 | -1.112630 | -8.100992 |
| 106 | 6 | 0 | -2.412626 | -3.973041 | -6.968281 |
| 107 | 6 | 0 | -3.617702 | -3.284040 | -6.795092 |
| 108 | 6 | 0 | -4.202292 | -4.688396 | -4.923887 |
| 109 | 6 | 0 | -5.427093 | -0.385168 | -5.653574 |
| 110 | 6 | 0 | -1.491486 | 2.072981  | -7.163430 |
| 111 | 6 | 0 | -2.095198 | -5.011654 | -6.073104 |
| 112 | 6 | 0 | 0.544547  | -2.532003 | -6.982269 |
| 113 | 6 | 0 | -3.613557 | 2.444890  | -5.982706 |
| 114 | 6 | 0 | -0.872351 | 3.006107  | -6.311128 |
| 115 | 6 | 0 | -1.605962 | 3.678182  | -5.320559 |

|     |   |   |           |           |            |
|-----|---|---|-----------|-----------|------------|
| 116 | 6 | 0 | -2.984141 | 3.410799  | -5.168741  |
| 117 | 6 | 0 | -5.864191 | 2.197455  | -7.095811  |
| 118 | 6 | 0 | -2.124618 | -3.548629 | -9.439761  |
| 119 | 6 | 0 | -1.447522 | 1.445216  | -9.609039  |
| 120 | 6 | 0 | -6.604784 | -2.783397 | -6.959756  |
| 121 | 1 | 0 | -0.311845 | -5.364476 | -6.865411  |
| 122 | 1 | 0 | 1.807023  | -3.733251 | -6.032429  |
| 123 | 1 | 0 | -5.498232 | -3.466315 | -3.137836  |
| 124 | 1 | 0 | -5.081285 | 1.980325  | -1.970001  |
| 125 | 1 | 0 | 2.709259  | 0.743640  | -6.781909  |
| 126 | 1 | 0 | -5.503079 | 2.980167  | -5.120032  |
| 127 | 1 | 0 | -4.799941 | -5.793948 | -3.385054  |
| 128 | 1 | 0 | -6.511925 | -3.535255 | -4.953745  |
| 129 | 1 | 0 | 2.704567  | -0.886603 | -5.383535  |
| 130 | 1 | 0 | -5.615044 | -1.061916 | -1.066832  |
| 131 | 1 | 0 | 0.249630  | 2.020597  | -8.427749  |
| 132 | 1 | 0 | 1.030995  | 2.565854  | -6.674841  |
| 133 | 1 | 0 | -3.166740 | 4.682562  | -3.669095  |
| 134 | 1 | 0 | -0.068300 | 4.734151  | -4.645851  |
| 135 | 1 | 0 | -1.726243 | -6.603014 | -4.113049  |
| 136 | 1 | 0 | -0.687562 | -4.491294 | -8.147844  |
| 137 | 1 | 0 | -3.328079 | 1.031642  | -7.574562  |
| 138 | 1 | 0 | -2.011212 | -0.996306 | -8.617600  |
| 139 | 1 | 0 | -3.850667 | -2.448226 | -7.457085  |
| 140 | 1 | 0 | -5.388317 | -0.423296 | -6.743068  |
| 141 | 1 | 0 | -6.931277 | 2.016801  | -6.926656  |
| 142 | 1 | 0 | -5.761811 | 3.181616  | -7.569941  |
| 143 | 1 | 0 | -5.510613 | 1.453126  | -7.815937  |
| 144 | 1 | 0 | -1.397224 | -3.331594 | -10.232030 |
| 145 | 1 | 0 | -2.889383 | -2.765294 | -9.473706  |
| 146 | 1 | 0 | -2.620062 | -4.494892 | -9.690285  |
| 147 | 1 | 0 | -2.395098 | 0.898795  | -9.571170  |
| 148 | 1 | 0 | -0.839829 | 1.003955  | -10.407968 |
| 149 | 1 | 0 | -1.680918 | 2.477632  | -9.898850  |
| 150 | 1 | 0 | -7.570032 | -2.283307 | -6.817569  |
| 151 | 1 | 0 | -6.799598 | -3.773713 | -7.389603  |
| 152 | 1 | 0 | -6.044530 | -2.209474 | -7.705405  |
| 153 | 6 | 0 | -0.955388 | 7.557766  | 4.026091   |
| 154 | 8 | 0 | -5.239855 | 2.687212  | 4.465649   |
| 155 | 8 | 0 | -6.290977 | 2.647178  | 1.840445   |
| 156 | 6 | 0 | 1.290886  | 7.515503  | 3.041950   |
| 157 | 8 | 0 | 0.838352  | 6.629263  | 5.265983   |
| 158 | 8 | 0 | 1.703184  | 8.403176  | 0.897551   |
| 159 | 8 | 0 | -5.919002 | 4.980460  | -2.283160  |
| 160 | 6 | 0 | -1.020155 | 9.412081  | 0.660481   |
| 161 | 8 | 0 | -1.008059 | 4.454034  | 5.798319   |
| 162 | 6 | 0 | -1.854429 | 7.210236  | 5.192896   |
| 163 | 8 | 0 | -6.294419 | 2.643415  | -0.869489  |
| 164 | 6 | 0 | -2.695233 | 5.989980  | 4.881531   |
| 165 | 8 | 0 | 2.614993  | 7.185266  | 3.232565   |
| 166 | 6 | 0 | -0.560070 | 8.568661  | 1.831451   |
| 167 | 6 | 0 | -5.409266 | 7.450521  | -1.076290  |
| 168 | 8 | 0 | -3.789672 | 6.390736  | -3.292800  |
| 169 | 8 | 0 | 0.227472  | 8.237162  | -1.538343  |
| 170 | 8 | 0 | -1.101885 | 6.843814  | -3.489765  |
| 171 | 8 | 0 | -2.729841 | 2.301027  | 5.494376   |
| 172 | 6 | 0 | 0.788835  | 8.166324  | 1.899932   |
| 173 | 6 | 0 | -6.146294 | 5.119328  | 3.422636   |
| 174 | 6 | 0 | 0.412295  | 7.230005  | 4.105236   |
| 175 | 6 | 0 | -5.691234 | 6.216203  | -0.245765  |
| 176 | 6 | 0 | -6.095297 | 3.807516  | -0.168022  |
| 177 | 6 | 0 | -5.988684 | 5.090877  | 1.916187   |
| 178 | 6 | 0 | -5.889696 | 4.984027  | -0.903631  |
| 179 | 6 | 0 | -3.184248 | 8.373104  | -0.222042  |
| 180 | 6 | 0 | -3.074922 | 3.579680  | 5.112345   |
| 181 | 6 | 0 | -5.746769 | 6.241318  | 1.152233   |
| 182 | 6 | 0 | -4.792962 | 4.995777  | 4.089402   |
| 183 | 6 | 0 | -3.946290 | 6.095642  | 4.261247   |
| 184 | 6 | 0 | -2.244967 | 4.708762  | 5.254451   |
| 185 | 6 | 0 | -1.416731 | 8.217078  | 2.881161   |
| 186 | 6 | 0 | -3.911422 | 7.656845  | -1.181004  |
| 187 | 6 | 0 | -4.359961 | 3.738497  | 4.557407   |
| 188 | 6 | 0 | -6.112136 | 3.860880  | 1.243676   |
| 189 | 6 | 0 | -1.806059 | 8.590107  | -0.335292  |
| 190 | 6 | 0 | -3.214926 | 7.116381  | -2.278817  |
| 191 | 6 | 0 | -1.828033 | 7.315179  | -2.424637  |
| 192 | 6 | 0 | -1.128109 | 8.036440  | -1.439154  |
| 193 | 6 | 0 | -1.779771 | 10.658604 | 1.126657   |



|     |   |   |           |           |           |
|-----|---|---|-----------|-----------|-----------|
| 194 | 6 | 0 | -6.928080 | 6.343306  | 3.909681  |
| 195 | 6 | 0 | -6.142620 | 8.692155  | -0.561042 |
| 196 | 6 | 0 | -2.700539 | 8.409804  | 5.634596  |
| 197 | 1 | 0 | -4.823386 | 1.822141  | 4.791649  |
| 198 | 1 | 0 | -6.148103 | 2.691111  | 2.845974  |
| 199 | 1 | 0 | 1.844218  | 6.486698  | 5.266941  |
| 200 | 1 | 0 | 1.225301  | 8.710624  | 0.043915  |
| 201 | 1 | 0 | -5.778885 | 4.039673  | -2.652013 |
| 202 | 1 | 0 | -0.092800 | 9.785650  | 0.122284  |
| 203 | 1 | 0 | -0.365762 | 5.235896  | 5.670862  |
| 204 | 1 | 0 | -1.193404 | 6.950322  | 6.075054  |
| 205 | 1 | 0 | -6.471565 | 1.856300  | -0.205192 |
| 206 | 1 | 0 | 3.144081  | 7.263571  | 2.367265  |
| 207 | 1 | 0 | -5.801610 | 7.257377  | -2.120734 |
| 208 | 1 | 0 | -4.743191 | 6.089179  | -3.052626 |
| 209 | 1 | 0 | 0.615914  | 7.680393  | -2.304005 |
| 210 | 1 | 0 | -1.668253 | 6.211634  | -4.066060 |
| 211 | 1 | 0 | -1.844411 | 2.293707  | 5.986050  |
| 212 | 1 | 0 | -6.757620 | 4.212283  | 3.718608  |
| 213 | 1 | 0 | -3.711726 | 8.781448  | 0.641057  |
| 214 | 1 | 0 | -5.599087 | 7.191822  | 1.666535  |
| 215 | 1 | 0 | -4.279786 | 7.073491  | 3.908825  |
| 216 | 1 | 0 | -2.474450 | 8.474710  | 2.809267  |
| 217 | 1 | 0 | -1.156844 | 11.268757 | 1.792448  |
| 218 | 1 | 0 | -2.065144 | 11.282849 | 0.270682  |
| 219 | 1 | 0 | -2.696040 | 10.413325 | 1.673214  |
| 220 | 1 | 0 | -7.920691 | 6.379567  | 3.444073  |
| 221 | 1 | 0 | -7.070876 | 6.304711  | 4.996771  |
| 222 | 1 | 0 | -6.422771 | 7.286464  | 3.678724  |
| 223 | 1 | 0 | -5.843441 | 8.965597  | 0.456264  |
| 224 | 1 | 0 | -5.942106 | 9.557460  | -1.204967 |
| 225 | 1 | 0 | -7.226517 | 8.526401  | -0.549982 |
| 226 | 1 | 0 | -2.056659 | 9.247283  | 5.931936  |
| 227 | 1 | 0 | -3.362990 | 8.774363  | 4.843102  |
| 228 | 1 | 0 | -3.327714 | 8.149538  | 6.496099  |
| 229 | 6 | 0 | 7.543224  | 1.242832  | 5.350320  |
| 230 | 8 | 0 | 2.353638  | 4.783331  | 5.769823  |
| 231 | 8 | 0 | 0.506589  | 3.296850  | 7.338252  |
| 232 | 6 | 0 | 7.496943  | -0.293023 | 3.435833  |
| 233 | 8 | 0 | 7.631948  | 1.991091  | 2.996679  |
| 234 | 8 | 0 | 7.443256  | -2.618511 | 3.708601  |
| 235 | 8 | 0 | 0.156584  | -1.489495 | 8.047685  |
| 236 | 6 | 0 | 7.290314  | -2.379177 | 6.637848  |
| 237 | 8 | 0 | 6.740598  | 4.441952  | 3.938485  |
| 238 | 6 | 0 | 7.637885  | 2.658806  | 5.884349  |
| 239 | 8 | 0 | -1.013162 | 0.989911  | 7.127584  |
| 240 | 6 | 0 | 6.249029  | 3.261633  | 5.951435  |
| 241 | 8 | 0 | 7.495281  | -0.544376 | 2.083997  |
| 242 | 6 | 0 | 7.397020  | -1.184225 | 5.710518  |
| 243 | 6 | 0 | 2.785832  | -1.661557 | 8.969071  |
| 244 | 8 | 0 | 1.748043  | -3.610667 | 7.051842  |
| 245 | 8 | 0 | 6.085263  | -4.481062 | 5.270242  |
| 246 | 8 | 0 | 3.375542  | -5.038646 | 5.385168  |
| 247 | 8 | 0 | 4.146890  | 5.344526  | 3.773994  |
| 248 | 6 | 0 | 7.437323  | -1.392067 | 4.315854  |
| 249 | 6 | 0 | 3.142351  | 3.361339  | 8.219850  |
| 250 | 6 | 0 | 7.557891  | 1.012505  | 3.962669  |
| 251 | 6 | 0 | 2.200833  | -0.357370 | 8.472735  |
| 252 | 6 | 0 | 0.293793  | 0.888630  | 7.563167  |
| 253 | 6 | 0 | 2.376421  | 2.061055  | 8.119111  |
| 254 | 6 | 0 | 0.867695  | -0.315521 | 8.014221  |
| 255 | 6 | 0 | 5.012117  | -2.016675 | 7.747046  |
| 256 | 6 | 0 | 4.498391  | 4.580636  | 4.859444  |
| 257 | 6 | 0 | 2.936311  | 0.832892  | 8.486186  |
| 258 | 6 | 0 | 4.061660  | 3.531189  | 7.028839  |
| 259 | 6 | 0 | 5.357521  | 2.997164  | 6.997120  |
| 260 | 6 | 0 | 5.821010  | 4.107464  | 4.909072  |
| 261 | 6 | 0 | 7.437235  | 0.129496  | 6.194050  |
| 262 | 6 | 0 | 3.650738  | -2.309375 | 7.908014  |
| 263 | 6 | 0 | 3.622760  | 4.276210  | 5.919647  |
| 264 | 6 | 0 | 1.045543  | 2.075478  | 7.657309  |
| 265 | 6 | 0 | 5.825916  | -2.712598 | 6.845239  |
| 266 | 6 | 0 | 3.081891  | -3.282544 | 7.067311  |
| 267 | 6 | 0 | 3.874270  | -4.023532 | 6.170573  |
| 268 | 6 | 0 | 5.251100  | -3.751558 | 6.083915  |
| 269 | 6 | 0 | 8.038193  | -2.189134 | 7.959699  |
| 270 | 6 | 0 | 3.887554  | 3.490192  | 9.552912  |
| 271 | 6 | 0 | 3.530917  | -1.489697 | 10.297548 |

|     |   |   |           |            |           |
|-----|---|---|-----------|------------|-----------|
| 272 | 6 | 0 | 8.374201  | 2.750078   | 7.223838  |
| 273 | 1 | 0 | 1.674144  | 4.289351   | 6.349261  |
| 274 | 1 | 0 | -0.458485 | 3.204974   | 7.026925  |
| 275 | 1 | 0 | 7.320546  | 2.903892   | 3.340321  |
| 276 | 1 | 0 | 7.167624  | -3.365428  | 4.345953  |
| 277 | 1 | 0 | -0.794794 | -1.369230  | 7.690709  |
| 278 | 1 | 0 | 7.777627  | -3.259859  | 6.119917  |
| 279 | 1 | 0 | 6.332432  | 5.088287   | 3.257476  |
| 280 | 1 | 0 | 8.246017  | 3.263096   | 5.146879  |
| 281 | 1 | 0 | -1.235664 | 0.240159   | 6.460828  |
| 282 | 1 | 0 | 7.416479  | 0.333720   | 1.579655  |
| 283 | 1 | 0 | 1.922590  | -2.363460  | 9.180487  |
| 284 | 1 | 0 | 1.169310  | -2.883416  | 7.475207  |
| 285 | 1 | 0 | 5.565642  | -5.162398  | 4.718990  |
| 286 | 1 | 0 | 2.357304  | -5.101386  | 5.489144  |
| 287 | 1 | 0 | 3.152456  | 5.597430   | 3.815278  |
| 288 | 1 | 0 | 2.389970  | 4.206852   | 8.196396  |
| 289 | 1 | 0 | 5.456029  | -1.222240  | 8.348860  |
| 290 | 1 | 0 | 3.978348  | 0.804883   | 8.811476  |
| 291 | 1 | 0 | 5.686074  | 2.358665   | 7.818426  |
| 292 | 1 | 0 | 7.390801  | 0.291751   | 7.272474  |
| 293 | 1 | 0 | 9.099399  | -1.976052  | 7.780510  |
| 294 | 1 | 0 | 7.979925  | -3.098720  | 8.571094  |
| 295 | 1 | 0 | 7.634466  | -1.367197  | 8.559927  |
| 296 | 1 | 0 | 3.187233  | 3.428339   | 10.395487 |
| 297 | 1 | 0 | 4.403054  | 4.456526   | 9.618994  |
| 298 | 1 | 0 | 4.639662  | 2.707886   | 9.695661  |
| 299 | 1 | 0 | 3.904622  | -2.454791  | 10.661933 |
| 300 | 1 | 0 | 2.863785  | -1.079362  | 11.066102 |
| 301 | 1 | 0 | 4.389759  | -0.815821  | 10.217434 |
| 302 | 1 | 0 | 7.859159  | 2.213851   | 8.027543  |
| 303 | 1 | 0 | 8.471428  | 3.796552   | 7.540194  |
| 304 | 1 | 0 | 9.385234  | 2.332028   | 7.142952  |
| 305 | 6 | 0 | 2.996345  | -7.208787  | -4.200264 |
| 306 | 8 | 0 | 7.417177  | -2.692549  | -5.342211 |
| 307 | 8 | 0 | 8.534039  | -2.312310  | -2.869058 |
| 308 | 6 | 0 | 0.944677  | -6.665436  | -2.987651 |
| 309 | 8 | 0 | 1.358603  | -5.794862  | -5.210427 |
| 310 | 8 | 0 | 0.553140  | -7.405972  | -0.818754 |
| 311 | 8 | 0 | 7.761790  | -3.780742  | 1.602473  |
| 312 | 6 | 0 | 3.142215  | -8.843618  | -0.716093 |
| 313 | 8 | 0 | 3.251934  | -4.566183  | -6.755374 |
| 314 | 6 | 0 | 3.812220  | -7.109534  | -5.470550 |
| 315 | 8 | 0 | 8.413369  | -1.713240  | -0.309521 |
| 316 | 6 | 0 | 4.760626  | -5.931570  | -5.387035 |
| 317 | 8 | 0 | -0.280573 | -6.031321  | -2.998737 |
| 318 | 6 | 0 | 2.665608  | -8.048887  | -1.916128 |
| 319 | 6 | 0 | 7.356114  | -6.418527  | 0.880210  |
| 320 | 8 | 0 | 5.594025  | -5.132537  | 2.859224  |
| 321 | 8 | 0 | 1.854414  | -7.753078  | 1.509896  |
| 322 | 8 | 0 | 2.944036  | -5.870827  | 3.136007  |
| 323 | 8 | 0 | 4.988840  | -2.403374  | -6.594094 |
| 324 | 6 | 0 | 1.415695  | -7.401482  | -1.882619 |
| 325 | 6 | 0 | 8.203992  | -4.994647  | -3.957080 |
| 326 | 6 | 0 | 1.751068  | -6.549276  | -4.135323 |
| 327 | 6 | 0 | 7.637499  | -5.357691  | -0.160966 |
| 328 | 6 | 0 | 8.128773  | -3.019506  | -0.680454 |
| 329 | 6 | 0 | 8.035724  | -4.678948  | -2.485475 |
| 330 | 6 | 0 | 7.847162  | -4.025046  | 0.260073  |
| 331 | 6 | 0 | 5.222332  | -7.578896  | 0.096717  |
| 332 | 6 | 0 | 5.265576  | -3.610496  | -5.991652 |
| 333 | 6 | 0 | 7.720639  | -5.649670  | -1.526991 |
| 334 | 6 | 0 | 6.868558  | -4.913009  | -4.667680 |
| 335 | 6 | 0 | 5.974019  | -5.989637  | -4.693731 |
| 336 | 6 | 0 | 4.412619  | -4.728954  | -6.031014 |
| 337 | 6 | 0 | 3.432860  | -7.927823  | -3.082115 |
| 338 | 6 | 0 | 5.869642  | -6.695798  | 0.972513  |
| 339 | 6 | 0 | 6.505297  | -3.722912  | -5.330236 |
| 340 | 6 | 0 | 8.220878  | -3.352820  | -2.046851 |
| 341 | 6 | 0 | 3.872102  | -7.920187  | 0.239336  |
| 342 | 6 | 0 | 5.109162  | -6.073334  | 1.980638  |
| 343 | 6 | 0 | 3.754518  | -6.409526  | 2.167407  |
| 344 | 6 | 0 | 3.160138  | -7.352378  | 1.311351  |
| 345 | 6 | 0 | 3.980627  | -10.066429 | -1.098298 |
| 346 | 6 | 0 | 8.912402  | -6.331503  | -4.194904 |
| 347 | 6 | 0 | 8.166710  | -7.697269  | 0.640450  |
| 348 | 6 | 0 | 4.535048  | -8.411669  | -5.823636 |
| 349 | 1 | 0 | 7.006718  | -1.831102  | -5.694821 |

|     |   |   |           |            |           |
|-----|---|---|-----------|------------|-----------|
| 350 | 1 | 0 | 8.377863  | -2.533147  | -3.857533 |
| 351 | 1 | 0 | 0.430049  | -5.373083  | -5.041992 |
| 352 | 1 | 0 | 1.024324  | -7.625375  | 0.070031  |
| 353 | 1 | 0 | 7.901853  | -2.796642  | 1.844837  |
| 354 | 1 | 0 | 2.227540  | -9.240941  | -0.183001 |
| 355 | 1 | 0 | 2.656286  | -5.395595  | -6.670918 |
| 356 | 1 | 0 | 3.082237  | -6.906491  | -6.317588 |
| 357 | 1 | 0 | 7.612895  | -1.295829  | 0.137063  |
| 358 | 1 | 0 | -0.674896 | -6.026062  | -2.057070 |
| 359 | 1 | 0 | 7.694289  | -6.014320  | 1.881887  |
| 360 | 1 | 0 | 6.372880  | -4.603630  | 2.456960  |
| 361 | 1 | 0 | 1.399823  | -7.176601  | 2.225775  |
| 362 | 1 | 0 | 3.420807  | -5.088280  | 3.602569  |
| 363 | 1 | 0 | 4.023928  | -2.384184  | -6.932312 |
| 364 | 1 | 0 | 8.873765  | -4.196538  | -4.402752 |
| 365 | 1 | 0 | 5.791272  | -8.019096  | -0.723466 |
| 366 | 1 | 0 | 7.544684  | -6.676176  | -1.855873 |
| 367 | 1 | 0 | 6.235174  | -6.906051  | -4.162224 |
| 368 | 1 | 0 | 4.408975  | -8.415141  | -3.121902 |
| 369 | 1 | 0 | 3.417449  | -10.733281 | -1.762998 |
| 370 | 1 | 0 | 4.910366  | -9.798801  | -1.610960 |
| 371 | 1 | 0 | 4.254641  | -10.641903 | -0.204759 |
| 372 | 1 | 0 | 9.070916  | -6.501683  | -5.267377 |
| 373 | 1 | 0 | 9.895393  | -6.342892  | -3.707497 |
| 374 | 1 | 0 | 8.345941  | -7.185164  | -3.809248 |
| 375 | 1 | 0 | 7.927858  | -8.178982  | -0.312779 |
| 376 | 1 | 0 | 9.241980  | -7.478361  | 0.636726  |
| 377 | 1 | 0 | 7.979644  | -8.431364  | 1.434093  |
| 378 | 1 | 0 | 5.064045  | -8.317501  | -6.780340 |
| 379 | 1 | 0 | 5.276884  | -8.699124  | -5.071066 |
| 380 | 1 | 0 | 3.823057  | -9.241487  | -5.915479 |
| 381 | 6 | 0 | -5.355783 | -2.384691  | 4.968662  |
| 382 | 8 | 0 | -7.190947 | -3.800394  | -0.976321 |
| 383 | 8 | 0 | -5.017082 | -5.545050  | -1.522200 |
| 384 | 6 | 0 | -3.188666 | -1.274002  | 5.254368  |
| 385 | 8 | 0 | -4.922300 | -0.072724  | 4.231374  |
| 386 | 8 | 0 | -1.380281 | -2.340487  | 6.311205  |
| 387 | 8 | 0 | -1.482213 | -7.998320  | 0.530787  |
| 388 | 6 | 0 | -2.954594 | -4.799092  | 6.753314  |
| 389 | 8 | 0 | -7.321418 | -0.468755  | 2.591651  |
| 390 | 6 | 0 | -6.799123 | -2.336683  | 4.513940  |
| 391 | 8 | 0 | -2.483146 | -6.608184  | -1.617482 |
| 392 | 6 | 0 | -6.896897 | -2.746790  | 3.058236  |
| 393 | 8 | 0 | -2.327299 | -0.214291  | 5.098733  |
| 394 | 6 | 0 | -3.497685 | -3.573909  | 6.046802  |
| 395 | 6 | 0 | -2.797506 | -8.249607  | 2.975265  |
| 396 | 8 | 0 | 0.090782  | -8.008648  | 3.153044  |
| 397 | 8 | 0 | -0.212328 | -4.994905  | 6.863682  |
| 398 | 8 | 0 | 1.324935  | -6.534675  | 5.173755  |
| 399 | 8 | 0 | -7.485866 | -1.239687  | -0.339145 |
| 400 | 6 | 0 | -2.686044 | -2.433799  | 5.879755  |
| 401 | 6 | 0 | -6.764670 | -5.885755  | 0.828780  |
| 402 | 6 | 0 | -4.527797 | -1.257600  | 4.806386  |
| 403 | 6 | 0 | -3.428457 | -7.513349  | 1.816404  |
| 404 | 6 | 0 | -3.261865 | -6.700310  | -0.487667 |
| 405 | 6 | 0 | -5.321833 | -6.340833  | 0.789291  |
| 406 | 6 | 0 | -2.712480 | -7.398586  | 0.607715  |
| 407 | 6 | 0 | -2.838621 | -6.461795  | 4.805426  |
| 408 | 6 | 0 | -7.246666 | -2.094070  | 0.732586  |
| 409 | 6 | 0 | -4.715699 | -6.969746  | 1.883368  |
| 410 | 6 | 0 | -6.861922 | -4.450173  | 1.296027  |
| 411 | 6 | 0 | -6.742541 | -4.072255  | 2.640453  |
| 412 | 6 | 0 | -7.154023 | -1.747837  | 2.092439  |
| 413 | 6 | 0 | -4.810689 | -3.527893  | 5.564838  |
| 414 | 6 | 0 | -2.121072 | -7.295060  | 3.938163  |
| 415 | 6 | 0 | -7.091954 | -3.440806  | 0.346292  |
| 416 | 6 | 0 | -4.565172 | -6.176446  | -0.387632 |
| 417 | 6 | 0 | -2.202038 | -5.683491  | 5.779332  |
| 418 | 6 | 0 | -0.714039 | -7.281265  | 4.003426  |
| 419 | 6 | 0 | -0.039143 | -6.524236  | 4.978045  |
| 420 | 6 | 0 | -0.797487 | -5.743790  | 5.871919  |
| 421 | 6 | 0 | -4.027811 | -5.592715  | 7.506449  |
| 422 | 6 | 0 | -7.658998 | -6.811874  | 1.660910  |
| 423 | 6 | 0 | -3.786002 | -9.164700  | 3.705805  |
| 424 | 6 | 0 | -7.738324 | -3.164871  | 5.397385  |
| 425 | 1 | 0 | -7.178983 | -2.967001  | -1.585328 |
| 426 | 1 | 0 | -5.830634 | -4.954166  | -1.334612 |
| 427 | 1 | 0 | -5.764938 | -0.182855  | 3.665050  |

|     |   |   |            |           |           |
|-----|---|---|------------|-----------|-----------|
| 428 | 1 | 0 | -0.955845  | -3.254242 | 6.438627  |
| 429 | 1 | 0 | -1.123509  | -7.955302 | -0.427277 |
| 430 | 1 | 0 | -2.224047  | -4.437950 | 7.538871  |
| 431 | 1 | 0 | -7.536672  | 0.221005  | 1.870218  |
| 432 | 1 | 0 | -7.146554  | -1.262641 | 4.603896  |
| 433 | 1 | 0 | -2.981006  | -6.112997 | -2.360444 |
| 434 | 1 | 0 | -2.793574  | 0.564593  | 4.642863  |
| 435 | 1 | 0 | -1.995690  | -8.926438 | 2.537874  |
| 436 | 1 | 0 | -0.456627  | -8.384527 | 2.374808  |
| 437 | 1 | 0 | 0.786460   | -5.177872 | 6.925054  |
| 438 | 1 | 0 | 1.811388   | -6.920373 | 4.371293  |
| 439 | 1 | 0 | -7.463933  | -0.281638 | -0.033069 |
| 440 | 1 | 0 | -7.161250  | -5.933079 | -0.230511 |
| 441 | 1 | 0 | -3.925708  | -6.421340 | 4.723940  |
| 442 | 1 | 0 | -5.275451  | -7.060610 | 2.815666  |
| 443 | 1 | 0 | -6.519781  | -4.838878 | 3.384827  |
| 444 | 1 | 0 | -5.439743  | -4.414005 | 5.670108  |
| 445 | 1 | 0 | -4.774765  | -6.033290 | 6.838469  |
| 446 | 1 | 0 | -3.571018  | -6.416861 | 8.069936  |
| 447 | 1 | 0 | -4.556836  | -4.954146 | 8.224397  |
| 448 | 1 | 0 | -7.595647  | -7.845037 | 1.297051  |
| 449 | 1 | 0 | -7.387925  | -6.819780 | 2.721516  |
| 450 | 1 | 0 | -8.708253  | -6.499182 | 1.594803  |
| 451 | 1 | 0 | -4.590119  | -8.607722 | 4.197296  |
| 452 | 1 | 0 | -4.252464  | -9.871401 | 3.008240  |
| 453 | 1 | 0 | -3.276039  | -9.749414 | 4.481802  |
| 454 | 1 | 0 | -7.658755  | -2.856209 | 6.447498  |
| 455 | 1 | 0 | -8.781664  | -3.026943 | 5.089845  |
| 456 | 1 | 0 | -7.524964  | -4.237787 | 5.352127  |
| 457 | 1 | 0 | -17.434852 | 0.455469  | -0.106414 |
| 458 | 1 | 0 | -15.927276 | 2.419824  | 0.170407  |
| 459 | 1 | 0 | -13.511601 | 2.071086  | 0.620016  |
| 460 | 1 | 0 | -10.108268 | -2.082590 | 2.539639  |
| 461 | 1 | 0 | -10.165368 | -0.280678 | 2.481787  |
| 462 | 1 | 0 | -9.504277  | -1.193334 | 1.108727  |
| 463 | 1 | 0 | -11.694931 | 0.748725  | 1.155339  |
| 464 | 1 | 0 | -11.970640 | -4.144224 | -1.227427 |
| 465 | 1 | 0 | -13.119136 | -2.875719 | -1.741091 |
| 466 | 1 | 0 | -11.629349 | -3.169241 | -2.681033 |
| 467 | 1 | 0 | -10.237496 | -2.367120 | -0.774480 |
| 468 | 1 | 0 | -12.403189 | -0.420301 | -1.750879 |
| 469 | 1 | 0 | -9.460405  | -0.287288 | -0.768793 |
| 470 | 1 | 0 | -9.093755  | 4.433477  | -1.213311 |
| 471 | 1 | 0 | -10.408109 | 3.841694  | -0.153258 |
| 472 | 1 | 0 | -8.319245  | 2.171974  | -1.608969 |
| 473 | 1 | 0 | -11.770090 | 1.700108  | -3.033523 |
| 474 | 6 | 0 | -10.825905 | 3.552785  | -2.267468 |
| 475 | 6 | 0 | -11.422677 | 2.157923  | -2.095395 |
| 476 | 7 | 0 | -10.311919 | 1.392727  | -1.537519 |
| 477 | 8 | 0 | -11.833481 | -2.379479 | 0.578264  |
| 478 | 6 | 0 | -12.192308 | -0.182738 | 0.853168  |
| 479 | 6 | 0 | -16.370487 | 0.307280  | 0.081919  |
| 480 | 6 | 0 | -8.970557  | 1.769140  | 0.448355  |
| 481 | 8 | 0 | -9.888539  | 1.874764  | 1.257995  |
| 482 | 6 | 0 | -13.636690 | -0.083292 | 0.556352  |
| 483 | 8 | 0 | -7.852648  | 1.182630  | 0.626001  |
| 484 | 6 | 0 | -10.387899 | 0.127008  | -1.180838 |
| 485 | 6 | 0 | -11.508447 | -0.704083 | -1.192111 |
| 486 | 6 | 0 | -11.314203 | -2.135642 | -0.818542 |
| 487 | 7 | 0 | -11.601062 | -1.279801 | 1.333815  |
| 488 | 6 | 0 | -10.267037 | -1.202984 | 1.904223  |
| 489 | 6 | 0 | -15.851723 | -0.984349 | 0.188448  |
| 490 | 1 | 0 | -11.592089 | 4.338130  | -2.273408 |
| 491 | 6 | 0 | -9.234865  | 2.261328  | -0.996925 |
| 492 | 6 | 0 | -9.857466  | 3.654109  | -1.086234 |
| 493 | 6 | 0 | -15.526576 | 1.407101  | 0.230767  |
| 494 | 6 | 0 | -14.170095 | 1.211273  | 0.473791  |
| 495 | 6 | 0 | -14.494358 | -1.186672 | 0.421314  |
| 496 | 1 | 0 | -12.264084 | 2.156428  | -1.381494 |
| 497 | 1 | 0 | -10.275923 | 3.606845  | -3.219628 |
| 498 | 6 | 0 | -12.055123 | -3.142726 | -1.669579 |
| 499 | 1 | 0 | -16.513306 | -1.846301 | 0.090514  |
| 500 | 1 | 0 | -14.093230 | -2.195021 | 0.509136  |

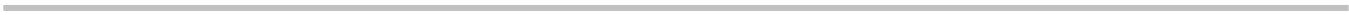

Supplement: d2qo00172a1.pdf [file d2qo00172a1.pdf]
